# Supplementary material for: Systemic factors associated with intraocular pressure among subjects in a health examination program in Japan
Source: PubMed Central journal article supplement (PMC7269229; doi:10.1371/journal.pone.0234042), 2020-06-03
Supplement: pone.0234042.s002.pdf [file pone.0234042.s002.pdf]

**Table S2.** Univariate analyses for possible correlations between each pair of parameters other than IOPs.

| <b>Parameter 1</b> | <b>Parameter 2</b> | <b>Spearman's <math>\rho</math></b> | <b>p-value</b> |
|--------------------|--------------------|-------------------------------------|----------------|
| Male=0/Female=1    | Age                | 0.0564                              | 0.0256*        |
| Height             | Age                | -0.2711                             | <.0001*        |
| Height             | Male=0/Female=1    | -0.7760                             | <.0001*        |
| Weight             | Age                | -0.2388                             | <.0001*        |
| Weight             | Male=0/Female=1    | -0.6049                             | <.0001*        |
| Weight             | Height             | 0.7109                              | <.0001*        |
| BMI                | Age                | -0.1003                             | <.0001*        |
| BMI                | Male=0/Female=1    | -0.1918                             | <.0001*        |
| BMI                | Height             | 0.1511                              | <.0001*        |
| BMI                | Weight             | 0.7838                              | <.0001*        |
| %Fat               | Age                | -0.1019                             | <.0001*        |
| %Fat               | Male=0/Female=1    | 0.4983                              | <.0001*        |
| %Fat               | Height             | -0.3694                             | <.0001*        |
| %Fat               | Weight             | 0.1827                              | <.0001*        |
| %Fat               | BMI                | 0.6022                              | <.0001*        |
| Waist              | Age                | 0.0009                              | 0.9731         |
| Waist              | Male=0/Female=1    | -0.3121                             | <.0001*        |
| Waist              | Height             | 0.3306                              | <.0001*        |
| Waist              | Weight             | 0.7535                              | <.0001*        |
| Waist              | BMI                | 0.783                               | <.0001*        |
| Waist              | %Fat               | 0.4164                              | <.0001*        |
| SBP                | Age                | 0.1637                              | <.0001*        |
| SBP                | Male=0/Female=1    | -0.1667                             | <.0001*        |
| SBP                | Height             | 0.0916                              | 0.0003*        |
| SBP                | Weight             | 0.2083                              | <.0001*        |
| SBP                | BMI                | 0.207                               | <.0001*        |
| SBP                | %Fat               | 0.0357                              | 0.1581         |
| SBP                | Waist              | 0.2274                              | <.0001*        |
| DBP                | Age                | -0.0046                             | 0.8548         |
| DBP                | Male=0/Female=1    | -0.2642                             | <.0001*        |
| DBP                | Height             | 0.2162                              | <.0001*        |
| DBP                | Weight             | 0.2951                              | <.0001*        |
| DBP                | BMI                | 0.2216                              | <.0001*        |
| DBP                | %Fat               | 0.0088                              | 0.7276         |
| DBP                | Waist              | 0.2701                              | <.0001*        |

|       |                 |         |         |
|-------|-----------------|---------|---------|
| DBP   | SBP             | 0.7639  | <.0001* |
| MBP   | Age             | 0.0698  | 0.0057* |
| MBP   | Male=0/Female=1 | -0.2367 | <.0001* |
| MBP   | Height          | 0.1738  | <.0001* |
| MBP   | Weight          | 0.2725  | <.0001* |
| MBP   | BMI             | 0.2263  | <.0001* |
| MBP   | %Fat            | 0.0186  | 0.4624  |
| MBP   | Waist           | 0.2656  | <.0001* |
| MBP   | SBP             | 0.9176  | <.0001* |
| MBP   | DBP             | 0.9546  | <.0001* |
| Pulse | Age             | 0.1276  | <.0001* |
| Pulse | Male=0/Female=1 | 0.2065  | <.0001* |
| Pulse | Height          | -0.2046 | <.0001* |
| Pulse | Weight          | -0.1306 | <.0001* |
| Pulse | BMI             | -0.0167 | 0.5076  |
| Pulse | %Fat            | 0.1743  | <.0001* |
| Pulse | Waist           | 0.0336  | 0.1832  |
| Pulse | SBP             | 0.1223  | <.0001* |
| Pulse | DBP             | 0.1375  | <.0001* |
| Pulse | MBP             | 0.1401  | <.0001* |
| BNP   | Age             | 0.4011  | <.0001* |
| BNP   | Male=0/Female=1 | 0.1509  | <.0001* |
| BNP   | Height          | -0.2011 | <.0001* |
| BNP   | Weight          | -0.2297 | <.0001* |
| BNP   | BMI             | -0.1506 | <.0001* |
| BNP   | %Fat            | -0.1080 | <.0001* |
| BNP   | Waist           | -0.1388 | <.0001* |
| BNP   | SBP             | 0.0532  | 0.0349* |
| BNP   | DBP             | -0.0655 | 0.0094* |
| BNP   | MBP             | -0.0150 | 0.5517  |
| BNP   | Pulse           | -0.0691 | 0.0062* |
| TP    | Age             | 0.0381  | 0.1316  |
| TP    | Male=0/Female=1 | 0.1078  | <.0001* |
| TP    | Height          | -0.0819 | 0.0012* |
| TP    | Weight          | 0.0061  | 0.808   |
| TP    | BMI             | 0.0903  | 0.0003* |
| TP    | %Fat            | 0.2328  | <.0001* |
| TP    | Waist           | 0.0681  | 0.0069* |

|      |                 |         |         |
|------|-----------------|---------|---------|
| TP   | SBP             | 0.0889  | 0.0004* |
| TP   | DBP             | 0.0539  | 0.0327* |
| TP   | MBP             | 0.0733  | 0.0037* |
| TP   | Pulse           | 0.214   | <.0001* |
| TP   | BNP             | -0.1329 | <.0001* |
| Alb  | Age             | -0.1614 | <.0001* |
| Alb  | Male=0/Female=1 | -0.0045 | 0.8595  |
| Alb  | Height          | 0.0488  | 0.0532  |
| Alb  | Weight          | 0.043   | 0.0885  |
| Alb  | BMI             | 0.0334  | 0.1859  |
| Alb  | %Fat            | 0.0893  | 0.0004* |
| Alb  | Waist           | 0.0041  | 0.8697  |
| Alb  | SBP             | 0.0741  | 0.0033* |
| Alb  | DBP             | 0.0834  | 0.0009* |
| Alb  | MBP             | 0.0834  | 0.0009* |
| Alb  | Pulse           | 0.1156  | <.0001* |
| Alb  | BNP             | -0.2321 | <.0001* |
| Alb  | TP              | 0.4998  | <.0001* |
| A/G  | Age             | -0.2117 | <.0001* |
| A/G  | Male=0/Female=1 | -0.1208 | <.0001* |
| A/G  | Height          | 0.1353  | <.0001* |
| A/G  | Weight          | 0.0494  | 0.0506  |
| A/G  | BMI             | -0.0419 | 0.097   |
| A/G  | %Fat            | -0.1390 | <.0001* |
| A/G  | Waist           | -0.0575 | 0.0227* |
| A/G  | SBP             | -0.0115 | 0.6498  |
| A/G  | DBP             | 0.0313  | 0.2146  |
| A/G  | MBP             | 0.013   | 0.6076  |
| A/G  | Pulse           | -0.1107 | <.0001* |
| A/G  | BNP             | -0.0912 | 0.0003* |
| A/G  | TP              | -0.5227 | <.0001* |
| A/G  | Alb             | 0.4048  | <.0001* |
| TBil | Age             | -0.0072 | 0.7766  |
| TBil | Male=0/Female=1 | -0.1539 | <.0001* |
| TBil | Height          | 0.1803  | <.0001* |
| TBil | Weight          | 0.1208  | <.0001* |
| TBil | BMI             | 0.0229  | 0.3653  |
| TBil | %Fat            | -0.1002 | <.0001* |

|      |                 |         |         |
|------|-----------------|---------|---------|
| TBil | Waist           | 0.0263  | 0.2981  |
| TBil | SBP             | 0.0515  | 0.0414* |
| TBil | DBP             | 0.0971  | 0.0001* |
| TBil | MBP             | 0.0815  | 0.0012* |
| TBil | Pulse           | -0.0639 | 0.0114* |
| TBil | BNP             | 0.0219  | 0.3868  |
| TBil | TP              | 0.0292  | 0.248   |
| TBil | Alb             | 0.1205  | <.0001* |
| TBil | A/G             | 0.0918  | 0.0003* |
| AST  | Age             | 0.1108  | <.0001* |
| AST  | Male=0/Female=1 | -0.1569 | <.0001* |
| AST  | Height          | 0.0588  | 0.0199* |
| AST  | Weight          | 0.0696  | 0.0058* |
| AST  | BMI             | 0.0662  | 0.0087* |
| AST  | %Fat            | -0.0438 | 0.0832  |
| AST  | Waist           | 0.093   | 0.0002* |
| AST  | SBP             | 0.0641  | 0.0111* |
| AST  | DBP             | 0.0695  | 0.0059* |
| AST  | MBP             | 0.0736  | 0.0035* |
| AST  | Pulse           | 0.0737  | 0.0035* |
| AST  | BNP             | -0.0014 | 0.9552  |
| AST  | TP              | 0.1814  | <.0001* |
| AST  | Alb             | 0.1047  | <.0001* |
| AST  | A/G             | -0.0919 | 0.0003* |
| AST  | TBil            | 0.0456  | 0.0709  |
| ALT  | Age             | -0.1223 | <.0001* |
| ALT  | Male=0/Female=1 | -0.2342 | <.0001* |
| ALT  | Height          | 0.1911  | <.0001* |
| ALT  | Weight          | 0.3225  | <.0001* |
| ALT  | BMI             | 0.3081  | <.0001* |
| ALT  | %Fat            | 0.1097  | <.0001* |
| ALT  | Waist           | 0.3038  | <.0001* |
| ALT  | SBP             | 0.0872  | 0.0005* |
| ALT  | DBP             | 0.1271  | <.0001* |
| ALT  | MBP             | 0.1188  | <.0001* |
| ALT  | Pulse           | 0.0871  | 0.0005* |
| ALT  | BNP             | -0.1819 | <.0001* |
| ALT  | TP              | 0.1556  | <.0001* |

|      |                 |         |         |
|------|-----------------|---------|---------|
| ALT  | Alb             | 0.1713  | <.0001* |
| ALT  | A/G             | 0.0151  | 0.5513  |
| ALT  | TBil            | 0.0682  | 0.0069* |
| ALT  | AST             | 0.7106  | <.0001* |
| γGTP | Age             | -0.0968 | 0.0001* |
| γGTP | Male=0/Female=1 | -0.4853 | <.0001* |
| γGTP | Height          | 0.3772  | <.0001* |
| γGTP | Weight          | 0.4311  | <.0001* |
| γGTP | BMI             | 0.3043  | <.0001* |
| γGTP | %Fat            | -0.0482 | 0.0564  |
| γGTP | Waist           | 0.3393  | <.0001* |
| γGTP | SBP             | 0.1813  | <.0001* |
| γGTP | DBP             | 0.2356  | <.0001* |
| γGTP | MBP             | 0.2272  | <.0001* |
| γGTP | Pulse           | 0.005   | 0.8434  |
| γGTP | BNP             | -0.1509 | <.0001* |
| γGTP | TP              | 0.0494  | 0.0504  |
| γGTP | Alb             | 0.0741  | 0.0033* |
| γGTP | A/G             | 0.0292  | 0.2482  |
| γGTP | TBil            | 0.0697  | 0.0058* |
| γGTP | AST             | 0.3914  | <.0001* |
| γGTP | ALT             | 0.556   | <.0001* |
| ALP  | Age             | 0.0855  | 0.0007* |
| ALP  | Male=0/Female=1 | 0.1147  | <.0001* |
| ALP  | Height          | -0.1370 | <.0001* |
| ALP  | Weight          | -0.0795 | 0.0016* |
| ALP  | BMI             | 0.0089  | 0.7241  |
| ALP  | %Fat            | 0.1177  | <.0001* |
| ALP  | Waist           | 0.0329  | 0.193   |
| ALP  | SBP             | 0.0638  | 0.0115* |
| ALP  | DBP             | 0.0451  | 0.0743  |
| ALP  | MBP             | 0.0559  | 0.0269* |
| ALP  | Pulse           | 0.1341  | <.0001* |
| ALP  | BNP             | 0.0079  | 0.7533  |
| ALP  | TP              | 0.142   | <.0001* |
| ALP  | Alb             | 0.0238  | 0.3466  |
| ALP  | A/G             | -0.1124 | <.0001* |
| ALP  | TBil            | -0.0637 | 0.0116* |

|      |                 |         |         |
|------|-----------------|---------|---------|
| ALP  | AST             | 0.0716  | 0.0045* |
| ALP  | ALT             | 0.1091  | <.0001* |
| ALP  | γGTP            | 0.0668  | 0.0081* |
| TCho | Age             | -0.0921 | 0.0003* |
| TCho | Male=0/Female=1 | 0.2354  | <.0001* |
| TCho | Height          | -0.1456 | <.0001* |
| TCho | Weight          | -0.0960 | 0.0001* |
| TCho | BMI             | -0.0149 | 0.5562  |
| TCho | %Fat            | 0.1882  | <.0001* |
| TCho | Waist           | -0.0210 | 0.4064  |
| TCho | SBP             | -0.0402 | 0.1114  |
| TCho | DBP             | -0.0216 | 0.3925  |
| TCho | MBP             | -0.0286 | 0.257   |
| TCho | Pulse           | 0.0666  | 0.0083* |
| TCho | BNP             | -0.0989 | <.0001* |
| TCho | TP              | 0.1181  | <.0001* |
| TCho | Alb             | 0.1536  | <.0001* |
| TCho | A/G             | 0.0128  | 0.6112  |
| TCho | TBil            | 0.0416  | 0.0994  |
| TCho | AST             | -0.0217 | 0.3896  |
| TCho | ALT             | -0.0040 | 0.8743  |
| TCho | γGTP            | -0.0367 | 0.1467  |
| TCho | ALP             | 0.0442  | 0.0803  |
| TG   | Age             | -0.0724 | 0.0041* |
| TG   | Male=0/Female=1 | -0.1955 | <.0001* |
| TG   | Height          | 0.1729  | <.0001* |
| TG   | Weight          | 0.3451  | <.0001* |
| TG   | BMI             | 0.3481  | <.0001* |
| TG   | %Fat            | 0.1966  | <.0001* |
| TG   | Waist           | 0.3652  | <.0001* |
| TG   | SBP             | 0.195   | <.0001* |
| TG   | DBP             | 0.2169  | <.0001* |
| TG   | MBP             | 0.2211  | <.0001* |
| TG   | Pulse           | 0.0812  | 0.0013* |
| TG   | BNP             | -0.1991 | <.0001* |
| TG   | TP              | 0.1186  | <.0001* |
| TG   | Alb             | 0.0969  | 0.0001* |
| TG   | A/G             | -0.0285 | 0.2596  |

|     |                 |         |         |
|-----|-----------------|---------|---------|
| TG  | TBil            | -0.0623 | 0.0135* |
| TG  | AST             | 0.0711  | 0.0048* |
| TG  | ALT             | 0.2487  | <.0001* |
| TG  | γGTP            | 0.3373  | <.0001* |
| TG  | ALP             | 0.0828  | 0.0010* |
| TG  | TCho            | 0.1635  | <.0001* |
| HDL | Age             | 0.0297  | 0.2389  |
| HDL | Male=0/Female=1 | 0.2664  | <.0001* |
| HDL | Height          | -0.2251 | <.0001* |
| HDL | Weight          | -0.3883 | <.0001* |
| HDL | BMI             | -0.3569 | <.0001* |
| HDL | %Fat            | -0.1374 | <.0001* |
| HDL | Waist           | -0.3778 | <.0001* |
| HDL | SBP             | -0.1092 | <.0001* |
| HDL | DBP             | -0.1349 | <.0001* |
| HDL | MBP             | -0.1290 | <.0001* |
| HDL | Pulse           | 0.0169  | 0.5024  |
| HDL | BNP             | 0.137   | <.0001* |
| HDL | TP              | -0.0644 | 0.0107* |
| HDL | Alb             | 0.0298  | 0.2382  |
| HDL | A/G             | 0.0831  | 0.0010* |
| HDL | TBil            | 0.0968  | 0.0001* |
| HDL | AST             | 0.0394  | 0.1187  |
| HDL | ALT             | -0.1606 | <.0001* |
| HDL | γGTP            | -0.1418 | <.0001* |
| HDL | ALP             | -0.0761 | 0.0025* |
| HDL | TCho            | 0.2595  | <.0001* |
| HDL | TG              | -0.5136 | <.0001* |
| LDL | Age             | -0.0788 | 0.0018* |
| LDL | Male=0/Female=1 | 0.1717  | <.0001* |
| LDL | Height          | -0.1017 | <.0001* |
| LDL | Weight          | 0.0051  | 0.8415  |
| LDL | BMI             | 0.0865  | 0.0006* |
| LDL | %Fat            | 0.2355  | <.0001* |
| LDL | Waist           | 0.0636  | 0.0117* |
| LDL | SBP             | -0.0379 | 0.1338  |
| LDL | DBP             | -0.0246 | 0.33    |
| LDL | MBP             | -0.0317 | 0.2091  |

|       |                 |         |         |
|-------|-----------------|---------|---------|
| LDL   | Pulse           | 0.0159  | 0.5294  |
| LDL   | BNP             | -0.1109 | <.0001* |
| LDL   | TP              | 0.1215  | <.0001* |
| LDL   | Alb             | 0.13    | <.0001* |
| LDL   | A/G             | -0.0111 | 0.6592  |
| LDL   | TBil            | 0.0375  | 0.1373  |
| LDL   | AST             | -0.1060 | <.0001* |
| LDL   | ALT             | -0.0237 | 0.3472  |
| LDL   | γGTP            | -0.0946 | 0.0002* |
| LDL   | ALP             | 0.046   | 0.0684  |
| LDL   | TCho            | 0.8233  | <.0001* |
| LDL   | TG              | 0.1179  | <.0001* |
| LDL   | HDL             | -0.0731 | 0.0038* |
| HbA1c | Age             | 0.1694  | <.0001* |
| HbA1c | Male=0/Female=1 | -0.0089 | 0.7257  |
| HbA1c | Height          | -0.0429 | 0.0897  |
| HbA1c | Weight          | 0.0624  | 0.0134* |
| HbA1c | BMI             | 0.1162  | <.0001* |
| HbA1c | %Fat            | 0.0972  | 0.0001* |
| HbA1c | Waist           | 0.1711  | <.0001* |
| HbA1c | SBP             | 0.0709  | 0.0049* |
| HbA1c | DBP             | 0.0046  | 0.8553  |
| HbA1c | MBP             | 0.034   | 0.1782  |
| HbA1c | Pulse           | 0.0454  | 0.0722  |
| HbA1c | BNP             | 0.0065  | 0.7977  |
| HbA1c | TP              | 0.0537  | 0.0333* |
| HbA1c | Alb             | -0.0195 | 0.4395  |
| HbA1c | A/G             | -0.0827 | 0.0010* |
| HbA1c | TBil            | -0.1773 | <.0001* |
| HbA1c | AST             | 0.0469  | 0.0632  |
| HbA1c | ALT             | 0.111   | <.0001* |
| HbA1c | γGTP            | 0.0799  | 0.0015* |
| HbA1c | ALP             | 0.1148  | <.0001* |
| HbA1c | TCho            | 0.0381  | 0.1319  |
| HbA1c | TG              | 0.1686  | <.0001* |
| HbA1c | HDL             | -0.1452 | <.0001* |
| HbA1c | LDL             | 0.0476  | 0.0595  |
| WBC   | Age             | -0.0628 | 0.0128* |



|     |                 |         |         |
|-----|-----------------|---------|---------|
| WBC | Male=0/Female=1 | -0.2137 | <.0001* |
| WBC | Height          | 0.1354  | <.0001* |
| WBC | Weight          | 0.2434  | <.0001* |
| WBC | BMI             | 0.2311  | <.0001* |
| WBC | %Fat            | 0.1126  | <.0001* |
| WBC | Waist           | 0.245   | <.0001* |
| WBC | SBP             | 0.1226  | <.0001* |
| WBC | DBP             | 0.1361  | <.0001* |
| WBC | MBP             | 0.1398  | <.0001* |
| WBC | Pulse           | 0.0465  | 0.0657  |
| WBC | BNP             | -0.0934 | 0.0002* |
| WBC | TP              | 0.0745  | 0.0032* |
| WBC | Alb             | -0.0025 | 0.9219  |
| WBC | A/G             | -0.0787 | 0.0018* |
| WBC | TBil            | -0.0901 | 0.0004* |
| WBC | AST             | 0.0144  | 0.5676  |
| WBC | ALT             | 0.1444  | <.0001* |
| WBC | γGTP            | 0.2164  | <.0001* |
| WBC | ALP             | 0.0878  | 0.0005* |
| WBC | TCho            | -0.0327 | 0.195   |
| WBC | TG              | 0.3127  | <.0001* |
| WBC | HDL             | -0.2823 | <.0001* |
| WBC | LDL             | 0.0442  | 0.0801  |
| WBC | HbA1c           | 0.1936  | <.0001* |
| RBC | Age             | -0.2372 | <.0001* |
| RBC | Male=0/Female=1 | -0.4208 | <.0001* |
| RBC | Height          | 0.406   | <.0001* |
| RBC | Weight          | 0.457   | <.0001* |
| RBC | BMI             | 0.2994  | <.0001* |
| RBC | %Fat            | 0.0438  | 0.0826  |
| RBC | Waist           | 0.3431  | <.0001* |
| RBC | SBP             | 0.1649  | <.0001* |
| RBC | DBP             | 0.2867  | <.0001* |
| RBC | MBP             | 0.2492  | <.0001* |
| RBC | Pulse           | -0.0050 | 0.842   |
| RBC | BNP             | -0.2571 | <.0001* |
| RBC | TP              | 0.1194  | <.0001* |
| RBC | Alb             | 0.2183  | <.0001* |

|     |                 |         |         |
|-----|-----------------|---------|---------|
| RBC | A/G             | 0.0892  | 0.0004* |
| RBC | TBil            | 0.1467  | <.0001* |
| RBC | AST             | 0.0698  | 0.0057* |
| RBC | ALT             | 0.2826  | <.0001* |
| RBC | γGTP            | 0.2925  | <.0001* |
| RBC | ALP             | 0.0948  | 0.0002* |
| RBC | TCho            | 0.0108  | 0.6686  |
| RBC | TG              | 0.2856  | <.0001* |
| RBC | HDL             | -0.2543 | <.0001* |
| RBC | LDL             | 0.0605  | 0.0166* |
| RBC | HbA1c           | 0.0877  | 0.0005* |
| RBC | WBC             | 0.2978  | <.0001* |
| Hb  | Age             | -0.1826 | <.0001* |
| Hb  | Male=0/Female=1 | -0.6287 | <.0001* |
| Hb  | Height          | 0.5463  | <.0001* |
| Hb  | Weight          | 0.5461  | <.0001* |
| Hb  | BMI             | 0.3094  | <.0001* |
| Hb  | %Fat            | -0.1063 | <.0001* |
| Hb  | Waist           | 0.3757  | <.0001* |
| Hb  | SBP             | 0.205   | <.0001* |
| Hb  | DBP             | 0.3062  | <.0001* |
| Hb  | MBP             | 0.2793  | <.0001* |
| Hb  | Pulse           | -0.0646 | 0.0105* |
| Hb  | BNP             | -0.2702 | <.0001* |
| Hb  | TP              | 0.0788  | 0.0018* |
| Hb  | Alb             | 0.2242  | <.0001* |
| Hb  | A/G             | 0.1434  | <.0001* |
| Hb  | TBil            | 0.2232  | <.0001* |
| Hb  | AST             | 0.1858  | <.0001* |
| Hb  | ALT             | 0.3639  | <.0001* |
| Hb  | γGTP            | 0.449   | <.0001* |
| Hb  | ALP             | 0.0296  | 0.2414  |
| Hb  | TCho            | -0.0266 | 0.2931  |
| Hb  | TG              | 0.2916  | <.0001* |
| Hb  | HDL             | -0.2271 | <.0001* |
| Hb  | LDL             | -0.0031 | 0.9034  |
| Hb  | HbA1c           | 0.0142  | 0.574   |
| Hb  | WBC             | 0.2769  | <.0001* |

|     |                 |         |         |
|-----|-----------------|---------|---------|
| Hb  | RBC             | 0.7969  | <.0001* |
| Ht  | Age             | -0.1688 | <.0001* |
| Ht  | Male=0/Female=1 | -0.5844 | <.0001* |
| Ht  | Height          | 0.5128  | <.0001* |
| Ht  | Weight          | 0.5094  | <.0001* |
| Ht  | BMI             | 0.2858  | <.0001* |
| Ht  | %Fat            | -0.0850 | 0.0008* |
| Ht  | Waist           | 0.3564  | <.0001* |
| Ht  | SBP             | 0.2125  | <.0001* |
| Ht  | DBP             | 0.3114  | <.0001* |
| Ht  | MBP             | 0.2866  | <.0001* |
| Ht  | Pulse           | -0.0491 | 0.052   |
| Ht  | BNP             | -0.2556 | <.0001* |
| Ht  | TP              | 0.0822  | 0.0011* |
| Ht  | Alb             | 0.2036  | <.0001* |
| Ht  | A/G             | 0.1162  | <.0001* |
| Ht  | TBil            | 0.202   | <.0001* |
| Ht  | AST             | 0.1706  | <.0001* |
| Ht  | ALT             | 0.3359  | <.0001* |
| Ht  | γGTP            | 0.4085  | <.0001* |
| Ht  | ALP             | 0.0542  | 0.0319* |
| Ht  | TCho            | -0.0099 | 0.6945  |
| Ht  | TG              | 0.2826  | <.0001* |
| Ht  | HDL             | -0.2114 | <.0001* |
| Ht  | LDL             | 0.0164  | 0.515   |
| Ht  | HbA1c           | 0.0477  | 0.0587  |
| Ht  | WBC             | 0.2983  | <.0001* |
| Ht  | RBC             | 0.8465  | <.0001* |
| Ht  | Hb              | 0.9552  | <.0001* |
| Plt | Age             | -0.1683 | <.0001* |
| Plt | Male=0/Female=1 | 0.1233  | <.0001* |
| Plt | Height          | -0.0925 | 0.0002* |
| Plt | Weight          | -0.0115 | 0.65    |
| Plt | BMI             | 0.0513  | 0.0423* |
| Plt | %Fat            | 0.1785  | <.0001* |
| Plt | Waist           | -0.0097 | 0.7022  |
| Plt | SBP             | -0.0372 | 0.1407  |
| Plt | DBP             | -0.0342 | 0.1752  |

|     |                 |         |         |
|-----|-----------------|---------|---------|
| Plt | MBP             | -0.0364 | 0.1497  |
| Plt | Pulse           | 0.0393  | 0.1198  |
| Plt | BNP             | -0.1631 | <.0001* |
| Plt | TP              | 0.0717  | 0.0045* |
| Plt | Alb             | -0.0090 | 0.7231  |
| Plt | A/G             | -0.0801 | 0.0015* |
| Plt | TBil            | -0.1823 | <.0001* |
| Plt | AST             | -0.1174 | <.0001* |
| Plt | ALT             | -0.0532 | 0.0353* |
| Plt | γGTP            | 0.0148  | 0.5588  |
| Plt | ALP             | 0.0571  | 0.0238* |
| Plt | TCho            | 0.1373  | <.0001* |
| Plt | TG              | 0.1092  | <.0001* |
| Plt | HDL             | -0.0180 | 0.4766  |
| Plt | LDL             | 0.1258  | <.0001* |
| Plt | HbA1c           | 0.0363  | 0.1506  |
| Plt | WBC             | 0.2529  | <.0001* |
| Plt | RBC             | -0.0491 | 0.0517  |
| Plt | Hb              | -0.1246 | <.0001* |
| Plt | Ht              | -0.1253 | <.0001* |
| Fib | Age             | 0.1543  | <.0001* |
| Fib | Male=0/Female=1 | 0.122   | <.0001* |
| Fib | Height          | -0.1595 | <.0001* |
| Fib | Weight          | -0.1098 | <.0001* |
| Fib | BMI             | -0.0269 | 0.287   |
| Fib | %Fat            | 0.0869  | 0.0006* |
| Fib | Waist           | -0.0510 | 0.0435* |
| Fib | SBP             | 0.0376  | 0.1362  |
| Fib | DBP             | -0.0186 | 0.4611  |
| Fib | MBP             | 0.0018  | 0.9418  |
| Fib | Pulse           | 0.0902  | 0.0003* |
| Fib | BNP             | 0.0464  | 0.0659  |
| Fib | TP              | 0.1151  | <.0001* |
| Fib | Alb             | -0.0769 | 0.0023* |
| Fib | A/G             | -0.1934 | <.0001* |
| Fib | TBil            | -0.1732 | <.0001* |
| Fib | AST             | -0.0490 | 0.0525  |
| Fib | ALT             | -0.1200 | <.0001* |

|     |                 |        |         |         |
|-----|-----------------|--------|---------|---------|
| Fib |                 | γGTP   | -0.1243 | <.0001* |
| Fib |                 | ALP    | 0.1643  | <.0001* |
| Fib |                 | TCho   | 0.0372  | 0.1403  |
| Fib |                 | TG     | 0.0009  | 0.9711  |
| Fib |                 | HDL    | -0.0647 | 0.0104* |
| Fib |                 | LDL    | 0.1014  | <.0001* |
| Fib |                 | HbA1c  | 0.1062  | <.0001* |
| Fib |                 | WBC    | 0.1805  | <.0001* |
| Fib |                 | RBC    | -0.1197 | <.0001* |
| Fib |                 | Hb     | -0.1228 | <.0001* |
| Fib |                 | Ht     | -0.0910 | 0.0003* |
| Fib |                 | Plt    | 0.1669  | <.0001* |
| BUN |                 | Age    | 0.1669  | <.0001* |
| BUN | Male=0/Female=1 |        | -0.0723 | 0.0042* |
| BUN |                 | Height | 0.0049  | 0.8448  |
| BUN |                 | Weight | -0.0106 | 0.6759  |
| BUN |                 | BMI    | -0.0187 | 0.4583  |
| BUN |                 | %Fat   | -0.0529 | 0.0362* |
| BUN |                 | Waist  | 0.0054  | 0.8317  |
| BUN |                 | SBP    | 0.0619  | 0.0142* |
| BUN |                 | DBP    | 0.0329  | 0.1924  |
| BUN |                 | MBP    | 0.0476  | 0.0594  |
| BUN |                 | Pulse  | -0.0284 | 0.2609  |
| BUN |                 | BNP    | 0.0489  | 0.0529  |
| BUN |                 | TP     | -0.0128 | 0.6118  |
| BUN |                 | Alb    | -0.0429 | 0.0893  |
| BUN |                 | A/G    | -0.0099 | 0.6945  |
| BUN |                 | TBil   | 0.0059  | 0.8164  |
| BUN |                 | AST    | 0.0339  | 0.1798  |
| BUN |                 | ALT    | 0.014   | 0.5801  |
| BUN |                 | γGTP   | -0.0264 | 0.2963  |
| BUN |                 | ALP    | -0.0511 | 0.0431* |
| BUN |                 | TCho   | -0.0426 | 0.0916  |
| BUN |                 | TG     | -0.0840 | 0.0009* |
| BUN |                 | HDL    | -0.0089 | 0.726   |
| BUN |                 | LDL    | -0.0197 | 0.4354  |
| BUN |                 | HbA1c  | 0.0908  | 0.0003* |
| BUN |                 | WBC    | 0.015   | 0.5516  |

|      |                 |         |         |
|------|-----------------|---------|---------|
| BUN  | RBC             | -0.0337 | 0.1824  |
| BUN  | Hb              | -0.0491 | 0.0517  |
| BUN  | Ht              | -0.0490 | 0.0525  |
| BUN  | Plt             | -0.1116 | <.0001* |
| BUN  | Fib             | 0.0014  | 0.9565  |
| Crea | Age             | -0.0296 | 0.242   |
| Crea | Male=0/Female=1 | -0.7243 | <.0001* |
| Crea | Height          | 0.5888  | <.0001* |
| Crea | Weight          | 0.4666  | <.0001* |
| Crea | BMI             | 0.1617  | <.0001* |
| Crea | %Fat            | -0.3686 | <.0001* |
| Crea | Waist           | 0.2207  | <.0001* |
| Crea | SBP             | 0.1494  | <.0001* |
| Crea | DBP             | 0.215   | <.0001* |
| Crea | MBP             | 0.2001  | <.0001* |
| Crea | Pulse           | -0.1784 | <.0001* |
| Crea | BNP             | -0.0960 | 0.0001* |
| Crea | TP              | -0.0721 | 0.0043* |
| Crea | Alb             | -0.0058 | 0.819   |
| Crea | A/G             | 0.0777  | 0.0021* |
| Crea | TBil            | 0.135   | <.0001* |
| Crea | AST             | 0.0964  | 0.0001* |
| Crea | ALT             | 0.1492  | <.0001* |
| Crea | γGTP            | 0.3266  | <.0001* |
| Crea | ALP             | -0.1439 | <.0001* |
| Crea | TCho            | -0.1621 | <.0001* |
| Crea | TG              | 0.1795  | <.0001* |
| Crea | HDL             | -0.2449 | <.0001* |
| Crea | LDL             | -0.0923 | 0.0003* |
| Crea | HbA1c           | 0.0036  | 0.8861  |
| Crea | WBC             | 0.2038  | <.0001* |
| Crea | RBC             | 0.3184  | <.0001* |
| Crea | Hb              | 0.4507  | <.0001* |
| Crea | Ht              | 0.4216  | <.0001* |
| Crea | Plt             | -0.1282 | <.0001* |
| Crea | Fib             | -0.0612 | 0.0153* |
| Crea | BUN             | 0.197   | <.0001* |
| Na   | Age             | -0.0546 | 0.0307* |

|    |                 |         |         |
|----|-----------------|---------|---------|
| Na | Male=0/Female=1 | 0.1422  | <.0001* |
| Na | Height          | -0.1311 | <.0001* |
| Na | Weight          | -0.0875 | 0.0005* |
| Na | BMI             | 0.0025  | 0.9211  |
| Na | %Fat            | 0.0587  | 0.0201* |
| Na | Waist           | -0.1105 | <.0001* |
| Na | SBP             | -0.0192 | 0.4483  |
| Na | DBP             | -0.0823 | 0.0011* |
| Na | MBP             | -0.0605 | 0.0166* |
| Na | Pulse           | -0.0386 | 0.1267  |
| Na | BNP             | -0.0249 | 0.324   |
| Na | TP              | -0.1081 | <.0001* |
| Na | Alb             | 0.0638  | 0.0114* |
| Na | A/G             | 0.1741  | <.0001* |
| Na | TBil            | -0.0278 | 0.2711  |
| Na | AST             | -0.0687 | 0.0065* |
| Na | ALT             | -0.0681 | 0.0070* |
| Na | γGTP            | -0.1029 | <.0001* |
| Na | ALP             | -0.0039 | 0.8764  |
| Na | TCho            | 0.0201  | 0.4265  |
| Na | TG              | -0.0472 | 0.0614  |
| Na | HDL             | 0.0393  | 0.1194  |
| Na | LDL             | 0.0643  | 0.0108* |
| Na | HbA1c           | -0.1037 | <.0001* |
| Na | WBC             | -0.0909 | 0.0003* |
| Na | RBC             | -0.0774 | 0.0021* |
| Na | Hb              | -0.0394 | 0.1191  |
| Na | Ht              | -0.0376 | 0.1365  |
| Na | Plt             | -0.0025 | 0.9201  |
| Na | Fib             | 0.0678  | 0.0072* |
| Na | BUN             | -0.0239 | 0.3433  |
| Na | Crea            | -0.0501 | 0.0472* |
| K  | Age             | 0.049   | 0.0522  |
| K  | Male=0/Female=1 | -0.1553 | <.0001* |
| K  | Height          | 0.1119  | <.0001* |
| K  | Weight          | 0.0772  | 0.0022* |
| K  | BMI             | 0.0261  | 0.3011  |
| K  | %Fat            | -0.0706 | 0.0051* |

|    |                 |         |         |
|----|-----------------|---------|---------|
| K  | Waist           | 0.0266  | 0.292   |
| K  | SBP             | 0.0076  | 0.7649  |
| K  | DBP             | -0.0028 | 0.911   |
| K  | MBP             | 0.0021  | 0.9332  |
| K  | Pulse           | -0.0578 | 0.0221* |
| K  | BNP             | -0.0225 | 0.3729  |
| K  | TP              | -0.0083 | 0.7437  |
| K  | Alb             | 0.0223  | 0.3777  |
| K  | A/G             | 0.0428  | 0.0905  |
| K  | TBil            | -0.0694 | 0.0060* |
| K  | AST             | 0.0728  | 0.0039* |
| K  | ALT             | 0.0263  | 0.2974  |
| K  | γGTP            | 0.0658  | 0.0092* |
| K  | ALP             | -0.0213 | 0.4     |
| K  | TCho            | -0.0683 | 0.0068* |
| K  | TG              | 0.052   | 0.0393* |
| K  | HDL             | -0.0457 | 0.07    |
| K  | LDL             | -0.0435 | 0.0848  |
| K  | HbA1c           | 0.0955  | 0.0002* |
| K  | WBC             | 0.087   | 0.0006* |
| K  | RBC             | 0.0467  | 0.0641  |
| K  | Hb              | 0.1035  | <.0001* |
| K  | Ht              | 0.1017  | <.0001* |
| K  | Plt             | 0.0925  | 0.0002* |
| K  | Fib             | 0.0789  | 0.0018* |
| K  | BUN             | 0.1378  | <.0001* |
| K  | Crea            | 0.1772  | <.0001* |
| K  | Na              | -0.0059 | 0.8153  |
| Cl | Age             | -0.1177 | <.0001* |
| Cl | Male=0/Female=1 | 0.0554  | 0.0282* |
| Cl | Height          | -0.0322 | 0.203   |
| Cl | Weight          | 0.0372  | 0.1408  |
| Cl | BMI             | 0.0929  | 0.0002* |
| Cl | %Fat            | 0.0368  | 0.1456  |
| Cl | Waist           | -0.0101 | 0.6891  |
| Cl | SBP             | -0.0840 | 0.0009* |
| Cl | DBP             | -0.0926 | 0.0002* |
| Cl | MBP             | -0.0942 | 0.0002* |



|    |                 |         |         |
|----|-----------------|---------|---------|
| Cl | Pulse           | -0.1331 | <.0001* |
| Cl | BNP             | 0.036   | 0.154   |
| Cl | TP              | -0.2947 | <.0001* |
| Cl | Alb             | -0.1521 | <.0001* |
| Cl | A/G             | 0.1516  | <.0001* |
| Cl | TBil            | -0.0450 | 0.0747  |
| Cl | AST             | -0.1603 | <.0001* |
| Cl | ALT             | -0.0972 | 0.0001* |
| Cl | γGTP            | -0.0809 | 0.0013* |
| Cl | ALP             | -0.1193 | <.0001* |
| Cl | TCho            | -0.0727 | 0.0040* |
| Cl | TG              | -0.0435 | 0.085   |
| Cl | HDL             | -0.0772 | 0.0022* |
| Cl | LDL             | 0.0326  | 0.1965  |
| Cl | HbA1c           | -0.1413 | <.0001* |
| Cl | WBC             | -0.0566 | 0.0249* |
| Cl | RBC             | -0.1533 | <.0001* |
| Cl | Hb              | -0.1415 | <.0001* |
| Cl | Ht              | -0.1693 | <.0001* |
| Cl | Plt             | 0.0312  | 0.2168  |
| Cl | Fib             | -0.0583 | 0.0210* |
| Cl | BUN             | 0.0144  | 0.5699  |
| Cl | Crea            | 0.0407  | 0.1067  |
| Cl | Na              | 0.5363  | <.0001* |
| Cl | K               | 0.1074  | <.0001* |
| Ca | Age             | -0.0961 | 0.0001* |
| Ca | Male=0/Female=1 | 0.1373  | <.0001* |
| Ca | Height          | -0.0547 | 0.0302* |
| Ca | Weight          | -0.0160 | 0.5269  |
| Ca | BMI             | 0.025   | 0.3231  |
| Ca | %Fat            | 0.1784  | <.0001* |
| Ca | Waist           | 0.0313  | 0.2154  |
| Ca | SBP             | 0.0282  | 0.2642  |
| Ca | DBP             | 0.0364  | 0.1491  |
| Ca | MBP             | 0.0338  | 0.1802  |
| Ca | Pulse           | 0.0919  | 0.0003* |
| Ca | BNP             | -0.1521 | <.0001* |
| Ca | TP              | 0.4304  | <.0001* |

|    |                 |         |         |
|----|-----------------|---------|---------|
| Ca | Alb             | 0.5069  | <.0001* |
| Ca | A/G             | 0.0448  | 0.0762  |
| Ca | TBil            | 0.0563  | 0.0256* |
| Ca | AST             | 0.0418  | 0.0975  |
| Ca | ALT             | 0.0799  | 0.0015* |
| Ca | γGTP            | 0.0063  | 0.8021  |
| Ca | ALP             | 0.0667  | 0.0082* |
| Ca | TCho            | 0.2129  | <.0001* |
| Ca | TG              | 0.09    | 0.0004* |
| Ca | HDL             | 0.0507  | 0.0445* |
| Ca | LDL             | 0.1658  | <.0001* |
| Ca | HbA1c           | 0.0728  | 0.0039* |
| Ca | WBC             | 0.0806  | 0.0014* |
| Ca | RBC             | 0.1222  | <.0001* |
| Ca | Hb              | 0.1142  | <.0001* |
| Ca | Ht              | 0.106   | <.0001* |
| Ca | Plt             | 0.1247  | <.0001* |
| Ca | Fib             | 0.098   | 0.0001* |
| Ca | BUN             | -0.0020 | 0.9361  |
| Ca | Crea            | -0.0260 | 0.3028  |
| Ca | Na              | 0.0133  | 0.5994  |
| Ca | K               | 0.1824  | <.0001* |
| Ca | Cl              | -0.1907 | <.0001* |
| UA | Age             | -0.0723 | 0.0042* |
| UA | Male=0/Female=1 | -0.5344 | <.0001* |
| UA | Height          | 0.4506  | <.0001* |
| UA | Weight          | 0.4892  | <.0001* |
| UA | BMI             | 0.3044  | <.0001* |
| UA | %Fat            | -0.1107 | <.0001* |
| UA | Waist           | 0.3424  | <.0001* |
| UA | SBP             | 0.1677  | <.0001* |
| UA | DBP             | 0.2189  | <.0001* |
| UA | MBP             | 0.2093  | <.0001* |
| UA | Pulse           | -0.1050 | <.0001* |
| UA | BNP             | -0.1114 | <.0001* |
| UA | TP              | 0.0467  | 0.0644  |
| UA | Alb             | 0.0285  | 0.2599  |
| UA | A/G             | -0.0135 | 0.594   |

|     |                 |         |         |
|-----|-----------------|---------|---------|
| UA  | TBil            | 0.0551  | 0.0290* |
| UA  | AST             | 0.1641  | <.0001* |
| UA  | ALT             | 0.2525  | <.0001* |
| UA  | γGTP            | 0.4053  | <.0001* |
| UA  | ALP             | -0.1223 | <.0001* |
| UA  | TCho            | -0.1216 | <.0001* |
| UA  | TG              | 0.2386  | <.0001* |
| UA  | HDL             | -0.2733 | <.0001* |
| UA  | LDL             | -0.0648 | 0.0102* |
| UA  | HbA1c           | 0.0277  | 0.2722  |
| UA  | WBC             | 0.2359  | <.0001* |
| UA  | RBC             | 0.3026  | <.0001* |
| UA  | Hb              | 0.3924  | <.0001* |
| UA  | Ht              | 0.3688  | <.0001* |
| UA  | Plt             | -0.0436 | 0.0845  |
| UA  | Fib             | -0.0277 | 0.272   |
| UA  | BUN             | 0.1419  | <.0001* |
| UA  | Crea            | 0.5719  | <.0001* |
| UA  | Na              | -0.0535 | 0.0342* |
| UA  | K               | 0.147   | <.0001* |
| UA  | Cl              | 0.0326  | 0.1966  |
| UA  | Ca              | 0.0663  | 0.0086* |
| Amy | Age             | 0.1806  | <.0001* |
| Amy | Male=0/Female=1 | 0.0393  | 0.1195  |
| Amy | Height          | -0.1133 | <.0001* |
| Amy | Weight          | -0.2444 | <.0001* |
| Amy | BMI             | -0.2485 | <.0001* |
| Amy | %Fat            | -0.1641 | <.0001* |
| Amy | Waist           | -0.2232 | <.0001* |
| Amy | SBP             | -0.0826 | 0.0011* |
| Amy | DBP             | -0.0954 | 0.0002* |
| Amy | MBP             | -0.0937 | 0.0002* |
| Amy | Pulse           | 0.0306  | 0.2255  |
| Amy | BNP             | 0.0868  | 0.0006* |
| Amy | TP              | 0.0348  | 0.1677  |
| Amy | Alb             | -0.0712 | 0.0048* |
| Amy | A/G             | -0.0845 | 0.0008* |
| Amy | TBil            | -0.0117 | 0.6434  |

|       |                 |         |         |
|-------|-----------------|---------|---------|
| Amy   | AST             | 0.0418  | 0.0983  |
| Amy   | ALT             | -0.0892 | 0.0004* |
| Amy   | γGTP            | -0.1564 | <.0001* |
| Amy   | ALP             | 0.0255  | 0.3124  |
| Amy   | TCho            | 0.0112  | 0.6568  |
| Amy   | TG              | -0.1464 | <.0001* |
| Amy   | HDL             | 0.137   | <.0001* |
| Amy   | LDL             | -0.0072 | 0.7769  |
| Amy   | HbA1c           | -0.0666 | 0.0083* |
| Amy   | WBC             | -0.1269 | <.0001* |
| Amy   | RBC             | -0.0868 | 0.0006* |
| Amy   | Hb              | -0.1059 | <.0001* |
| Amy   | Ht              | -0.0832 | 0.0010* |
| Amy   | Plt             | -0.0254 | 0.3148  |
| Amy   | Fib             | 0.057   | 0.0239* |
| Amy   | BUN             | 0.0744  | 0.0032* |
| Amy   | Crea            | 0.0757  | 0.0027* |
| Amy   | Na              | -0.0193 | 0.4441  |
| Amy   | K               | 0.028   | 0.2676  |
| Amy   | Cl              | -0.1149 | <.0001* |
| Amy   | Ca              | 0       | 1       |
| Amy   | UA              | -0.1030 | <.0001* |
| IMT_R | Age             | 0.3642  | <.0001* |
| IMT_R | Male=0/Female=1 | -0.0528 | 0.0364* |
| IMT_R | Height          | -0.0334 | 0.1862  |
| IMT_R | Weight          | 0.0104  | 0.6794  |
| IMT_R | BMI             | 0.0415  | 0.1001  |
| IMT_R | %Fat            | -0.0332 | 0.1887  |
| IMT_R | Waist           | 0.1502  | <.0001* |
| IMT_R | SBP             | 0.1973  | <.0001* |
| IMT_R | DBP             | 0.0989  | <.0001* |
| IMT_R | MBP             | 0.1474  | <.0001* |
| IMT_R | Pulse           | 0.0144  | 0.5692  |
| IMT_R | BNP             | 0.1249  | <.0001* |
| IMT_R | TP              | 0.0554  | 0.0281* |
| IMT_R | Alb             | -0.0726 | 0.0040* |
| IMT_R | A/G             | -0.1375 | <.0001* |
| IMT_R | TBil            | -0.0306 | 0.2255  |

|       |                 |         |         |
|-------|-----------------|---------|---------|
| IMT_R | AST             | 0.033   | 0.1918  |
| IMT_R | ALT             | -0.0113 | 0.6534  |
| IMT_R | γGTP            | -0.0139 | 0.5836  |
| IMT_R | ALP             | 0.0708  | 0.0050* |
| IMT_R | TCho            | -0.0217 | 0.3914  |
| IMT_R | TG              | 0.0192  | 0.4463  |
| IMT_R | HDL             | -0.0469 | 0.0631  |
| IMT_R | LDL             | -0.0194 | 0.4423  |
| IMT_R | HbA1c           | 0.1594  | <.0001* |
| IMT_R | WBC             | 0.0262  | 0.3     |
| IMT_R | RBC             | 0.0177  | 0.4846  |
| IMT_R | Hb              | 0.0412  | 0.1026  |
| IMT_R | Ht              | 0.0384  | 0.1281  |
| IMT_R | Plt             | -0.0256 | 0.3107  |
| IMT_R | Fib             | 0.0267  | 0.2899  |
| IMT_R | BUN             | 0.1077  | <.0001* |
| IMT_R | Crea            | 0.0363  | 0.1504  |
| IMT_R | Na              | -0.0743 | 0.0032* |
| IMT_R | K               | 0.0353  | 0.1627  |
| IMT_R | Cl              | -0.1430 | <.0001* |
| IMT_R | Ca              | 0.0157  | 0.5333  |
| IMT_R | UA              | 0.0265  | 0.2939  |
| IMT_R | Amy             | 0.0717  | 0.0045* |
| IMT_L | Age             | 0.4187  | <.0001* |
| IMT_L | Male=0/Female=1 | -0.0234 | 0.3545  |
| IMT_L | Height          | -0.0719 | 0.0044* |
| IMT_L | Weight          | -0.0096 | 0.7035  |
| IMT_L | BMI             | 0.0423  | 0.0939  |
| IMT_L | %Fat            | -0.0132 | 0.6016  |
| IMT_L | Waist           | 0.147   | <.0001* |
| IMT_L | SBP             | 0.236   | <.0001* |
| IMT_L | DBP             | 0.1256  | <.0001* |
| IMT_L | MBP             | 0.1808  | <.0001* |
| IMT_L | Pulse           | 0.0277  | 0.2735  |
| IMT_L | BNP             | 0.1434  | <.0001* |
| IMT_L | TP              | 0.0449  | 0.0757  |
| IMT_L | Alb             | -0.0797 | 0.0016* |
| IMT_L | A/G             | -0.1375 | <.0001* |

|       |       |         |         |
|-------|-------|---------|---------|
| IMT_L | TBil  | -0.0347 | 0.1694  |
| IMT_L | AST   | 0.0377  | 0.1351  |
| IMT_L | ALT   | 0.0139  | 0.5835  |
| IMT_L | γGTP  | 0.0206  | 0.4145  |
| IMT_L | ALP   | 0.0851  | 0.0007* |
| IMT_L | TCho  | -0.0396 | 0.1165  |
| IMT_L | TG    | 0.0501  | 0.0471* |
| IMT_L | HDL   | -0.0932 | 0.0002* |
| IMT_L | LDL   | -0.0124 | 0.6222  |
| IMT_L | HbA1c | 0.1882  | <.0001* |
| IMT_L | WBC   | 0.0507  | 0.0449* |
| IMT_L | RBC   | -0.0282 | 0.2647  |
| IMT_L | Hb    | 0.001   | 0.9691  |
| IMT_L | Ht    | 0.0062  | 0.8072  |
| IMT_L | Plt   | -0.0540 | 0.0325* |
| IMT_L | Fib   | 0.0639  | 0.0113* |
| IMT_L | BUN   | 0.102   | <.0001* |
| IMT_L | Crea  | 0.0111  | 0.6593  |
| IMT_L | Na    | -0.0962 | 0.0001* |
| IMT_L | K     | 0.0437  | 0.0834  |
| IMT_L | Cl    | -0.1511 | <.0001* |
| IMT_L | Ca    | 0.0139  | 0.5829  |
| IMT_L | UA    | 0.0058  | 0.8178  |
| IMT_L | Amy   | 0.0155  | 0.5406  |
| IMT_L | IMT_R | 0.5943  | <.0001* |

---
