# Supplementary material for: Systemic factors associated with intraocular pressure among subjects in a health examination program in Japan
Source: PLoS One. 2020 Jun 3;15(6):e0234042. doi: 10.1371/journal.pone.0234042 (PMC7269229; doi:10.1371/journal.pone.0234042)
Supplement: S1 Table — (PDF) [file pone.0234042.s001.pdf]

Table S1. Dataset

| Age | Sex | Height | BW   | BMI   | %Fat | Waist | SBP | DBP | MBP   | Pulse | BNP  | TP  | Alb | A/G | Tbil | AST | ALT | γGTP | Alp | TC  | TG  | HDL | LDL   | HbA1c | WBC  | RBC | Hb   | Ht   | Plt  | Fib | BUN  | Cre  | Na  | K   | Cl  | Ca  | UA  | Amy | RIOP | LIOP | RIMT | LIMIT |
|-----|-----|--------|------|-------|------|-------|-----|-----|-------|-------|------|-----|-----|-----|------|-----|-----|------|-----|-----|-----|-----|-------|-------|------|-----|------|------|------|-----|------|------|-----|-----|-----|-----|-----|-----|------|------|------|-------|
| 73  | M   | 168.9  | 56.2 | 19.7  | 20.7 | 82    | 120 | 60  | 80    | 73    | 5.5  | 7.4 | 4.4 | 1.5 | 0.4  | 16  | 13  | 23   | 251 | 147 | 41  | 43  | 95.8  | 7.6   | 66.4 | 451 | 14.1 | 42.1 | 19   | 221 | 22.4 | 0.85 | 143 | 3.9 | 107 | 9.1 | 5   | 65  | 12.4 | 9.2  | 0.7  | 0.7   |
| 71  | F   | 147.9  | 51.3 | 23.45 | 32.1 | 74    | 129 | 70  | 89.67 | 71    | 21.6 | 7.3 | 4   | 1.2 | 0.4  | 52  | 51  | 61   | 330 | 256 | 108 | 69  | 165.4 | 5.8   | 62.1 | 401 | 12.3 | 35.9 | 22.3 | 303 | 13.3 | 0.46 | 144 | 3.6 | 108 | 8.8 | 4.1 | 73  | 13.5 | 14.5 | 0.7  | 0.7   |
| 85  | M   | 161.9  | 43   | 16.4  | 11.7 | 70    | 121 | 69  | 86.33 | 64    | 19.1 | 8.3 | 4.4 | 1.1 | 0.5  | 23  | 10  | 24   | 186 | 173 | 53  | 75  | 87.4  | 5.1   | 64.5 | 441 | 14.6 | 42.8 | 21.6 | 341 | 15.9 | 0.58 | 140 | 4.6 | 101 | 9.8 | 5.3 | 117 | 11.1 | 8.7  | 0.8  | 0.8   |
| 72  | M   | 158.3  | 62.9 | 25.1  | 24.7 | 89    | 118 | 60  | 79.33 | 54    | 7.9  | 8.2 | 4.6 | 1.3 | 0.8  | 39  | 50  | 72   | 287 | 235 | 109 | 63  | 150.2 | 6.5   | 49.7 | 466 | 14.6 | 43.2 | 25.1 | 308 | 9.2  | 0.77 | 144 | 3.4 | 104 | 9   | 7.8 | 47  | 10.1 | 10.5 | 0.6  | 0.6   |
| 55  | F   | 152.3  | 52.5 | 22.63 | 31.1 | 75    | 104 | 56  | 72    | 55    | 7    | 7.7 | 4.5 | 1.4 | 0.7  | 29  | 41  | 26   | 285 | 304 | 107 | 65  | 217.6 | 6     | 44.7 | 468 | 14.8 | 43.5 | 19.7 | 318 | 11   | 0.53 | 143 | 3.9 | 105 | 9.2 | 4.2 | 63  | 12.9 | 11   | 0.8  | 0.6   |
| 64  | M   | 168.2  | 66.3 | 23.43 | 23.1 | 83    | 115 | 59  | 77.67 | 51    | 19.9 | 6.9 | 4.3 | 1.7 | 0.8  | 23  | 21  | 43   | 194 | 177 | 116 | 47  | 106.8 | 10.4  | 67.3 | 412 | 13.2 | 39   | 216  | 335 | 18.1 | 0.8  | 140 | 4.4 | 106 | 9   | 6.3 | 55  | 16.5 | 19.4 | 0.7  | 0.6   |
| 70  | M   | 164.7  | 61.6 | 22.71 | 20.8 | 84    | 147 | 66  | 93    | 81    | 29.2 | 7.3 | 4.5 | 1.6 | 0.9  | 23  | 18  | 50   | 154 | 203 | 109 | 57  | 124.2 | 5.6   | 71.3 | 450 | 14.9 | 44.8 | 23.8 | 261 | 19.9 | 0.67 | 143 | 4.3 | 106 | 9.1 | 6.5 | 56  | 7.7  | 7.8  | 0.7  | 1.1   |
| 69  | F   | 159    | 60.2 | 23.81 | 33.8 | 81    | 157 | 81  | 106.3 | 62    | 53   | 7.6 | 4.1 | 1.2 | 0.7  | 22  | 18  | 20   | 183 | 201 | 135 | 61  | 113   | 5.1   | 77.3 | 421 | 13   | 39.4 | 33   | 272 | 16   | 0.57 | 143 | 4.1 | 107 | 9.4 | 4.3 | 81  | 10.4 | 11   | 1.1  | 1     |
| 57  | M   | 173.2  | 66.3 | 22.1  | 19.1 | 86    | 134 | 79  | 97.33 | 54    | 17.8 | 6.6 | 4.4 | 2   | 1    | 23  | 19  | 28   | 245 | 209 | 139 | 50  | 131.2 | 5.2   | 61.9 | 483 | 15.1 | 44.7 | 18.7 | 279 | 11.9 | 0.87 | 147 | 4.2 | 106 | 9.4 | 7.2 | 85  | 7.9  | 7.7  | 0.7  | 0.6   |
| 73  | M   | 165.7  | 59   | 21.49 | 21.4 | 88.5  | 135 | 81  | 99    | 76    | 3    | 7.6 | 4.7 | 1.6 | 0.7  | 32  | 61  | 47   | 246 | 227 | 126 | 46  | 155.8 | 5.5   | 47.2 | 466 | 15.5 | 46.7 | 28.7 | 283 | 12.3 | 0.88 | 144 | 4.4 | 105 | 9.7 | 5.6 | 97  | 11.9 | 20.1 | 0.8  | 0.9   |
| 49  | M   | 174.1  | 68.6 | 22.63 | 21   | 89    | 113 | 60  | 77.67 | 52    | 3.2  | 6.3 | 4.2 | 2   | 0.7  | 18  | 23  | 48   | 317 | 213 | 89  | 46  | 149.2 | 5.3   | 57.5 | 464 | 15   | 45.4 | 23.6 | 279 | 11.5 | 0.71 | 147 | 4.1 | 110 | 8.9 | 4.3 | 126 | 8.3  | 10.6 | 0.6  | 0.5   |
| 54  | M   | 174.9  | 89   | 29.09 | 29.1 | 101   | 105 | 60  | 75    | 71    | 12   | 7   | 4.6 | 1.9 | 0.6  | 23  | 28  | 115  | 258 | 217 | 169 | 46  | 137.2 | 6.2   | 62   | 492 | 16.2 | 48.6 | 21.9 | 226 | 15.4 | 0.67 | 144 | 4.4 | 104 | 9.1 | 4.7 | 34  | 11   | 10.5 | 0.5  | 0.6   |
| 57  | M   | 173.3  | 66.8 | 22.24 | 18.8 | 82    | 119 | 69  | 85.67 | 59    | 18.4 | 7.3 | 4.4 | 1.5 | 0.8  | 21  | 13  | 41   | 243 | 236 | 68  | 72  | 150.4 | 5.8   | 42.6 | 394 | 13.9 | 42.1 | 23.3 | 414 | 19.4 | 0.81 | 146 | 4.7 | 109 | 9.1 | 6.6 | 58  | 18.8 | 15.3 | 0.8  | 0.7   |
| 58  | M   | 167.7  | 75.8 | 26.95 | 24.2 | 96.5  | 125 | 76  | 92.33 | 57    | 31.8 | 6.8 | 4.2 | 1.6 | 0.4  | 17  | 13  | 66   | 280 | 238 | 162 | 53  | 152.6 | 5.8   | 93.3 | 438 | 14.2 | 42   | 28.7 | 296 | 12.5 | 0.71 | 145 | 4.5 | 108 | 9.1 | 6.5 | 50  | 12.5 | 11.3 | 0.7  | 0.8   |
| 68  | F   | 149.1  | 49.1 | 22.09 | 26.7 | 71    | 96  | 51  | 66    | 68    | 13.7 | 7   | 4.3 | 1.6 | 0.5  | 21  | 13  | 13   | 235 | 216 | 81  | 76  | 123.8 | 4.9   | 49.4 | 405 | 12.9 | 39.6 | 24.1 | 320 | 17.5 | 0.48 | 146 | 4.2 | 107 | 9.1 | 3.9 | 86  | 14.4 | 14.9 | 0.7  | 0.7   |
| 64  | F   | 155.2  | 57   | 23.66 | 31.2 | 76    | 125 | 66  | 85.67 | 64    | 32.2 | 7.2 | 4.3 | 1.5 | 0.9  | 25  | 19  | 28   | 202 | 250 | 81  | 80  | 153.8 | 4.8   | 44.8 | 394 | 12.4 | 37.8 | 20.9 | 247 | 17.2 | 0.51 | 145 | 4.3 | 108 | 9   | 3.1 | 49  | 14.1 | 12.7 | 0.9  | 0.8   |
| 61  | F   | 163.3  | 63.3 | 23.74 | 33.8 | 76    | 132 | 64  | 86.67 | 62    | 10.1 | 7.2 | 4.7 | 1.9 | 0.9  | 24  | 27  | 38   | 214 | 249 | 105 | 60  | 168   | 5.3   | 58.9 | 415 | 13.1 | 38.5 | 22.9 | 275 | 18.4 | 0.52 | 143 | 4.1 | 107 | 9.6 | 4.6 | 57  | 16.5 | 15.2 | 0.5  | 0.5   |
| 79  | M   | 163.3  | 72.4 | 27.15 | 26.3 | 97.5  | 117 | 62  | 80.33 | 72    | 41.1 | 7.3 | 4.4 | 1.5 | 1    | 26  | 31  | 67   | 173 | 223 | 86  | 62  | 143.8 | 4.7   | 58.1 | 430 | 14.1 | 42   | 14.1 | 226 | 15.7 | 0.51 | 142 | 4.1 | 101 | 9   | 4.7 | 41  | 9.8  | 8.5  | 0.6  | 1     |
| 54  | F   | 154.5  | 52.3 | 21.91 | 27.8 | 75    | 120 | 72  | 88    | 73    | 15.4 | 7.1 | 4.2 | 1.4 | 0.7  | 16  | 19  | 17   | 218 | 245 | 168 | 64  | 147.4 | 4.9   | 50.7 | 395 | 12.4 | 37.9 | 24.8 | 301 | 11   | 0.58 | 141 | 3.9 | 104 | 9.1 | 3.6 | 135 | 9.7  | 10.4 | 0.5  | 0.6   |
| 40  | M   | 165.9  | 86.2 | 31.32 | 29.7 | 99    | 142 | 80  | 100.7 | 53    | 2.5  | 7.5 | 4.7 | 1.7 | 0.9  | 55  | 113 | 112  | 162 | 240 | 481 | 41  | 102.8 | 5.1   | 63.2 | 521 | 15.6 | 45   | 26.6 | 219 | 10.7 | 0.8  | 143 | 4   | 105 | 9.5 | 5.1 | 45  | 15.8 | 17.4 | 0.7  | 0.7   |
| 39  | F   | 157.4  | 71.6 | 28.9  | 45.2 | 86    | 116 | 50  | 72    | 62    | 2.7  | 7.8 | 4.4 | 1.3 | 0.5  | 22  | 24  | 33   | 174 | 196 | 58  | 51  | 133.4 | 5.6   | 64.4 | 462 | 14.2 | 42   | 22.4 | 301 | 14.7 | 0.64 | 140 | 4.5 | 105 | 9.3 | 7.2 | 61  | 11.7 | 13.3 | 0.5  | 0.6   |
| 58  | M   | 171    | 66.5 | 22.74 | 20.6 | 83.5  | 127 | 76  | 93    | 79    | 4.8  | 7.5 | 4.7 | 1.7 | 0.5  | 26  | 24  | 31   | 219 | 242 | 70  | 84  | 144   | 5.2   | 65.4 | 472 | 15.7 | 45.6 | 23.3 | 394 | 15.3 | 0.8  | 141 | 4.6 | 107 | 9.4 | 8.7 | 68  | 12.8 | 13   | 0.8  | 0.7   |
| 64  | M   | 162.9  | 73.2 | 27.58 | 30.4 | 95    | 132 | 66  | 88    | 62    | 8.9  | 7.4 | 4.3 | 1.4 | 0.6  | 21  | 27  | 41   | 290 | 232 | 139 | 67  | 137.2 | 8.5   | 74   | 480 | 15.6 | 45.4 | 33.6 | 331 | 17.1 | 0.73 | 141 | 4.5 | 105 | 9.4 | 5   | 52  | 13.1 | 14   | 0.9  | 1.3   |
| 58  | M   | 176.5  | 65.8 | 21.12 | 24.4 | 86.5  | 109 | 56  | 73.67 | 49    | 15.1 | 7.7 | 4.2 | 1.2 | 1    | 18  | 18  | 35   | 170 | 190 | 71  | 62  | 113.8 | 4.9   | 75   | 428 | 13.7 | 41.5 | 26.2 | 250 | 17   | 0.53 | 141 | 4.1 | 105 | 9.3 | 5.4 | 68  | 13.9 | 13.1 | 0.8  | 0.8   |
| 55  | F   | 152.5  | 62.8 | 27    | 43.4 | 86    | 128 | 62  | 84    | 58    | 5.8  | 7.4 | 4.4 | 1.5 | 0.7  | 20  | 24  | 56   | 253 | 234 | 206 | 58  | 134.8 | 5.6   | 49.5 | 445 | 13.3 | 40.5 | 30.4 | 271 | 15.2 | 0.67 | 142 | 4.5 | 105 | 9.7 | 4.9 | 68  | 17.5 | 16.7 | 0.6  | 0.6   |
| 62  | F   | 157.3  | 49.7 | 20.09 | 26.5 | 71    | 96  | 60  | 72    | 62    | 10.6 | 7.3 | 4.3 | 1.4 | 0.6  | 40  | 40  | 175  | 480 | 262 | 91  | 68  | 175.8 | 5.1   | 91.3 | 437 | 13.6 | 41.8 | 27.9 | 349 | 14.5 | 0.75 | 143 | 4.1 | 105 | 9.5 | 5.6 | 89  | 13.9 | 12   | 0.7  | 0.8   |
| 50  | F   | 158.1  | 50.3 | 20.12 | 28.6 | 70.5  | 111 | 64  | 79.67 | 68    | 4.7  | 8   | 4   | 1   | 0.3  | 20  | 12  | 29   | 247 | 180 | 80  | 70  | 94    | 5.2   | 91.9 | 444 | 9.6  | 32.3 | 56.3 | 279 | 15.6 | 0.47 | 140 | 4.5 | 103 | 8.7 | 4   | 51  | 15.8 | 12.9 | 0.5  | 0.6   |
| 46  | M   | 173.2  | 67.6 | 22.53 | 21.4 | 82    | 120 | 72  | 88    | 55    | 18.2 | 7.4 | 4.2 | 1.3 | 0.4  | 21  | 11  | 18   | 192 | 168 | 161 | 41  | 94.8  | 5.9   | 51.9 | 408 | 14.3 | 42.1 | 23.3 | 301 | 21.5 | 0.94 | 146 | 4.5 | 108 | 8.9 | 7.6 | 45  | 9.1  | 12.8 | 0.9  | 0.7   |
| 58  | M   | 165.1  | 68.8 | 25.24 | 24.4 | 85    | 159 | 90  | 113   | 60    | 11.2 | 6.6 | 4.2 | 1.8 | 0.8  | 16  | 13  | 23   | 168 | 162 | 88  | 37  | 107.4 | 5.1   | 51.2 | 471 | 15.4 | 44.5 | 18.1 | 279 | 12.1 | 0.85 | 141 | 4.2 | 107 | 9.2 | 5.4 | 56  | 9.9  | 9.7  | 0.6  | 0.5   |
| 52  | M   | 162.4  | 54.1 | 20.51 | 14.6 | 71    | 109 | 66  | 80.33 | 54    | 14.5 | 6.6 | 4.1 | 1.6 | 0.8  | 20  | 14  | 23   | 109 | 192 | 76  | 66  | 110.8 | 5.3   | 61.6 | 395 | 12.8 | 37.8 | 20.2 | 233 | 21.9 | 0.92 | 146 | 3.9 | 110 | 9.3 | 5.4 | 145 | 10.4 | 11.4 | 0.5  | 0.5   |
| 52  | M   | 170.6  | 59.3 | 20.37 | 19   | 71    | 124 | 62  | 82.67 | 52    | 8.4  | 7.5 | 4.5 | 1.5 | 1.1  | 17  | 11  | 17   | 148 | 157 | 44  | 58  | 90.2  | 4.7   | 40.1 | 457 | 14.6 | 42.1 | 24.1 | 243 | 14.7 | 0.81 | 143 | 3.8 | 106 | 9.1 | 6.1 | 73  | 9.4  | 9.2  | 0.5  | 0.5   |
| 50  | M   | 167.8  | 73.7 | 26.17 | 24.5 | 86    | 157 | 96  | 116.3 | 61    | 2    | 7.6 | 4.6 | 1.5 | 0.7  | 36  | 58  | 47   | 183 | 190 | 154 | 31  | 128.2 | 5     | 61.6 | 533 | 17.6 | 50.5 | 23.7 | 196 | 16.6 | 1.12 | 143 | 4.2 | 104 | 9.6 | 6.6 | 73  | 16.7 | 13.6 | 0.8  | 0.9   |
| 49  | M   | 180.1  | 86.2 | 26.58 | 23.3 | 88    | 128 | 65  | 86    | 55    | 8.8  | 7.5 | 4.4 | 1.4 | 0.7  | 22  | 28  | 86   | 163 | 233 | 189 | 60  | 135.2 | 4.9   | 50.4 | 397 | 13.7 | 38.9 | 32.3 | 244 | 15.4 | 0.8  | 143 | 4.1 | 105 | 9.1 | 6.4 | 46  | 17.5 | 17.2 | 0.7  | 0.7   |
| 58  | M   | 162.1  | 48.5 | 18.46 | 14.4 | 69    | 122 | 75  | 90.67 | 63    | 10.6 | 7.2 | 4.5 | 1.7 | 1.6  | 28  | 17  | 66   | 186 | 195 | 37  | 73  | 114.6 | 4.9   | 38.6 | 475 | 15.6 | 46.2 | 29.6 | 296 | 16.4 | 0.58 | 144 | 4.4 | 105 | 9.4 | 3.3 | 94  | 13   | 11   | 0.5  | 0.7   |
| 67  | M   | 169.7  | 71.2 | 24.72 | 24   | 87.5  | 155 | 76  | 102.3 | 44    | 12   | 7.4 | 4.3 | 1.4 | 1.5  | 22  | 17  | 22   | 164 | 229 | 100 | 72  | 137   |       |      |     |      |      |      |     |      |      |     |     |     |     |     |     |      |      |      |       |

|      |       |      |       |      |      |     |     |       |    |      |     |     |     |     |    |    |     |     |     |     |    |       |     |      |     |      |      |      |     |      |      |     |     |     |      |     |     |      |        |     |     |
|------|-------|------|-------|------|------|-----|-----|-------|----|------|-----|-----|-----|-----|----|----|-----|-----|-----|-----|----|-------|-----|------|-----|------|------|------|-----|------|------|-----|-----|-----|------|-----|-----|------|--------|-----|-----|
| 62 F | 161.1 | 54.7 | 21.08 | 26.7 | 77   | 146 | 71  | 96    | 58 | 3.5  | 7.1 | 4.5 | 1.7 | 0.4 | 19 | 19 | 26  | 212 | 226 | 108 | 59 | 145.4 | 5.4 | 46.6 | 465 | 14.2 | 43   | 25   | 349 | 11.3 | 0.48 | 143 | 4   | 104 | 9.2  | 4.4 | 79  | 10.4 | 10.8   | 0.9 | 1   |
| 50 F | 152   | 54.5 | 23.59 | 30.7 | 67   | 105 | 59  | 74.33 | 66 | 14   | 7.8 | 4.5 | 1.4 | 0.9 | 16 | 13 | 15  | 242 | 200 | 57  | 77 | 111.6 | 4.8 | 51   | 443 | 13.1 | 38.8 | 33.9 | 361 | 14.1 | 0.63 | 143 | 4.1 | 107 | 9.6  | 4.9 | 69  | 14.2 | 13.8   | 0.5 | 0.5 |
| 57 M | 172.3 | 76.4 | 25.73 | 18.8 | 82   | 114 | 76  | 88.67 | 55 | 33.6 | 7.3 | 4.3 | 1.4 | 0.9 | 20 | 22 | 27  | 199 | 228 | 77  | 56 | 156.6 | 5.1 | 56.7 | 454 | 14.7 | 43.7 | 26.9 | 320 | 19.2 | 0.87 | 143 | 4.2 | 108 | 9.5  | 5.7 | 91  | 13   | 11.1   | 0.6 | 0.6 |
| 53 M | 169   | 71.3 | 24.96 | 23.2 | 83   | 124 | 70  | 88    | 51 | 10.7 | 6.9 | 4.3 | 1.7 | 1.2 | 24 | 27 | 69  | 243 | 232 | 105 | 51 | 160   | 5.7 | 56   | 457 | 15   | 43.5 | 33.6 | 355 | 10.4 | 0.83 | 141 | 4.1 | 104 | 9.1  | 5.6 | 80  | 14.8 | 12.1   | 0.6 | 0.5 |
| 54 M | 164.5 | 63.1 | 23.32 | 21.1 | 78   | 125 | 76  | 92.33 | 57 | 5.1  | 7.3 | 4.3 | 1.4 | 0.6 | 18 | 13 | 25  | 166 | 148 | 57  | 48 | 88.6  | 6.5 | 77.1 | 433 | 14.8 | 43   | 20.4 | 275 | 14.1 | 0.67 | 144 | 4.3 | 108 | 9.3  | 5.9 | 67  | 11.8 | 15.8   | 0.6 | 0.6 |
| 58 M | 160.5 | 59.4 | 23.06 | 22.4 | 78   | 106 | 54  | 71.33 | 49 | 15.4 | 6.6 | 4.2 | 1.8 | 0.5 | 26 | 26 | 48  | 160 | 178 | 123 | 51 | 102.4 | 6.2 | 84.2 | 435 | 14.7 | 42.3 | 28.9 | 250 | 10.3 | 0.86 | 143 | 4.4 | 104 | 9.7  | 6.2 | 97  | 15.5 | 12.5   | 0.6 | 0.7 |
| 59 F | 157.3 | 55.5 | 22.43 | 26.8 | 70   | 122 | 65  | 84    | 68 | 30.2 | 7.8 | 4.6 | 1.4 | 0.7 | 24 | 22 | 57  | 304 | 234 | 73  | 84 | 135.4 | 4.8 | 42.6 | 399 | 12.3 | 35.6 | 31.3 | 296 | 8.3  | 0.5  | 143 | 3.9 | 106 | 10.3 | 5.2 | 105 | 17.5 | 17.7   | 0.6 | 0.5 |
| 67 M | 170   | 64.8 | 22.42 | 22.9 | 84.5 | 123 | 75  | 91    | 65 | 18.8 | 7.3 | 4.5 | 1.6 | 1.2 | 17 | 12 | 18  | 177 | 222 | 90  | 47 | 157   | 4.7 | 58.5 | 441 | 14.5 | 41.3 | 19.9 | 320 | 23.4 | 0.88 | 145 | 4.1 | 108 | 9.4  | 4.7 | 103 | 11.6 | 13.2   | 0.5 | 0.7 |
| 64 F | 151.3 | 49.8 | 21.75 | 26.4 | 65   | 100 | 58  | 72    | 65 | 46.2 | 7.9 | 4.5 | 1.3 | 0.8 | 23 | 13 | 19  | 164 | 269 | 93  | 78 | 172.4 | 5.2 | 59.9 | 411 | 12.5 | 36.8 | 20.4 | 326 | 15.4 | 0.65 | 142 | 3.8 | 104 | 9.3  | 4.5 | 65  | 13.5 | 13.7   | 0.6 | 0.7 |
| 58 M | 164.3 | 63.4 | 23.49 | 26.5 | 84   | 142 | 92  | 108.7 | 65 | 15.5 | 7.4 | 4.5 | 1.6 | 0.6 | 17 | 21 | 110 | 245 | 243 | 148 | 68 | 145.4 | 4.9 | 97.5 | 444 | 15.2 | 46   | 29.9 | 483 | 13.8 | 0.9  | 144 | 4.5 | 107 | 9.7  | 4.8 | 72  | 9.8  | 8.3    | 0.7 | 0.7 |
| 61 M | 165.7 | 70.1 | 25.53 | 25.9 | 90   | 130 | 74  | 92.67 | 63 | 11.4 | 7.8 | 4.7 | 1.5 | 0.6 | 24 | 19 | 43  | 157 | 214 | 75  | 78 | 121   | 5.5 | 50.1 | 444 | 14.7 | 42.2 | 22.8 | 198 | 10.9 | 0.77 | 138 | 4.2 | 99  | 8.8  | 5.3 | 91  | 10.9 | 11.7   | 0.4 | 0.6 |
| 61 F | 163.2 | 54.4 | 20.42 | 21.2 | 68   | 121 | 60  | 80.33 | 61 | 41   | 7.4 | 4.2 | 1.3 | 0.7 | 36 | 35 | 54  | 210 | 228 | 132 | 56 | 145.6 | 4.6 | 41.5 | 446 | 14.2 | 42.8 | 26.8 | 310 | 10.8 | 0.74 | 146 | 4   | 106 | 9.1  | 6.1 | 46  | 9.2  | 8.5    | 0.7 | 0.7 |
| 65 F | 148.1 | 38.3 | 17.46 | 17.5 | 60.5 | 139 | 79  | 99    | 57 | 21.7 | 7   | 4.4 | 1.7 | 0.5 | 32 | 29 | 45  | 214 | 211 | 55  | 83 | 117   | 5.5 | 44.9 | 391 | 12.6 | 37.4 | 17.8 | 355 | 12.9 | 0.44 | 145 | 3.9 | 106 | 9.1  | 4.1 | 67  | 12.5 | 10.8   | 0.8 | 0.9 |
| 53 M | 161.3 | 76.7 | 29.48 | 33.5 | 89   | 128 | 56  | 80    | 54 | 6.6  | 7.2 | 4.4 | 1.6 | 0.8 | 20 | 14 | 23  | 201 | 175 | 98  | 41 | 114.4 | 4.7 | 65   | 516 | 17.2 | 48.6 | 24   | 355 | 18.6 | 0.67 | 145 | 4   | 105 | 8.8  | 6.3 | 66  | 17.3 | 18     | 0.5 | 0.5 |
| 63 M | 162.5 | 65.8 | 24.92 | 21.6 | 82   | 105 | 61  | 75.67 | 48 | 7.3  | 8   | 4.7 | 1.4 | 0.8 | 25 | 25 | 36  | 238 | 178 | 161 | 49 | 96.8  | 5.2 | 59.8 | 531 | 15.2 | 44.7 | 24.5 | 305 | 20.5 | 0.7  | 143 | 4.2 | 104 | 9.1  | 5.7 | 97  | 11.7 | 16.8   | 0.6 | 0.7 |
| 57 F | 155.7 | 50.4 | 20.79 | 29.9 | 71   | 105 | 54  | 71    | 68 | 7    | 7.2 | 4.4 | 1.6 | 0.7 | 16 | 14 | 14  | 186 | 180 | 107 | 51 | 107.6 | 4.7 | 77.3 | 444 | 13.5 | 39.9 | 22.5 | 331 | 6.7  | 0.48 | 141 | 4.1 | 104 | 9    | 3   | 64  | 16   | 15.9   | 0.5 | 0.7 |
| 66 F | 164.1 | 61.8 | 22.95 | 30.1 | 82   | 142 | 67  | 92    | 67 | 5    | 7.9 | 4.5 | 1.3 | 0.7 | 24 | 21 | 22  | 306 | 221 | 76  | 71 | 134.8 | 7.4 | 62.6 | 445 | 13.7 | 41.5 | 24   | 292 | 18.2 | 0.54 | 143 | 4.6 | 104 | 9.7  | 4.3 | 51  | 11.4 | 19     | 0.7 | 1.1 |
| 67 M | 164.1 | 51.2 | 19.01 | 16.3 | 70.5 | 137 | 74  | 95    | 62 | 36.7 | 7.7 | 4.3 | 1.3 | 1.1 | 22 | 16 | 41  | 241 | 188 | 98  | 51 | 117.4 | 4.9 | 54   | 397 | 13.1 | 38.9 | 25.8 | 244 | 12   | 0.74 | 143 | 4   | 106 | 8.6  | 4.5 | 86  | 15.9 | 15.5   | 0.6 | 0.6 |
| 57 M | 162.1 | 70.3 | 26.75 | 26.7 | 88   | 123 | 61  | 81.67 | 59 | 20.2 | 7.5 | 4.6 | 1.6 | 0.4 | 41 | 44 | 117 | 206 | 164 | 64  | 60 | 91.2  | 5.5 | 76.2 | 436 | 14.5 | 42.6 | 23   | 315 | 13.6 | 0.96 | 146 | 4.5 | 107 | 9.8  | 7.4 | 66  | 12.4 | 12.9   | 0.5 | 0.6 |
| 57 M | 159.7 | 61.2 | 24    | 24   | 77   | 138 | 80  | 99.33 | 49 | 13   | 7.7 | 4.7 | 1.5 | 1.1 | 31 | 33 | 146 | 154 | 158 | 184 | 47 | 74.2  | 5.6 | 63.3 | 464 | 15.5 | 45.2 | 23.7 | 320 | 16.6 | 0.87 | 143 | 4.5 | 106 | 9.5  | 8.4 | 75  | 11.7 | 11.9   | 0.7 | 0.6 |
| 57 M | 164.1 | 73.3 | 27.22 | 25.7 | 90   | 146 | 86  | 106   | 46 | 15.9 | 7   | 4.4 | 1.7 | 0.5 | 24 | 40 | 29  | 249 | 207 | 122 | 56 | 126.6 | 4.9 | 55.4 | 496 | 15.2 | 44.9 | 21.1 | 355 | 15.2 | 1    | 143 | 4.1 | 106 | 9.4  | 6.8 | 67  | 10.1 | 9.5    | 0.8 | 0.6 |
| 56 F | 149.5 | 50.6 | 22.64 | 29.2 | 65   | 142 | 83  | 102.7 | 58 | 8.9  | 7.1 | 4.6 | 1.8 | 0.8 | 20 | 21 | 16  | 303 | 215 | 58  | 60 | 143.4 | 4.8 | 42.7 | 449 | 14   | 40.4 | 26.5 | 257 | 16.9 | 0.51 | 142 | 4   | 105 | 9.4  | 3.4 | 71  | 9.5  | 8.8    | 0.6 | 0.7 |
| 58 F | 160.1 | 50.1 | 19.55 | 20   | 67   | 91  | 48  | 62.33 | 47 | 29.7 | 7.1 | 4.4 | 1.6 | 1.3 | 37 | 32 | 18  | 187 | 243 | 65  | 95 | 135   | 5.1 | 41.3 | 390 | 12.1 | 35.9 | 17.7 | 292 | 18.7 | 0.56 | 142 | 4   | 106 | 9    | 4.4 | 98  | 14   | 12.5   | 0.7 | 0.8 |
| 55 M | 168.5 | 71.5 | 25.18 | 25.1 | 86   | 133 | 69  | 90.33 | 58 | 5.3  | 7.4 | 4.6 | 1.6 | 0.7 | 23 | 17 | 24  | 146 | 173 | 97  | 61 | 92.6  | 4.9 | 55.6 | 430 | 14.2 | 42   | 22   | 264 | 17.1 | 0.92 | 144 | 4   | 106 | 9.5  | 7   | 54  | 14.9 | 16     | 0.5 | 0.5 |
| 55 F | 158.3 | 52.3 | 20.87 | 23.5 | 66   | 93  | 45  | 61    | 48 | 14.3 | 7.2 | 4.4 | 1.6 | 0.6 | 26 | 22 | 19  | 149 | 209 | 81  | 76 | 116.8 | 5.4 | 32   | 406 | 12.9 | 38.3 | 14.5 | 250 | 13.6 | 0.61 | 142 | 4.1 | 107 | 9.5  | 4.2 | 113 | 8    | 7.9    | 0.5 | 0.7 |
| 59 M | 161.3 | 53.6 | 20.6  | 18.9 | 76   | 139 | 83  | 101.7 | 52 | 11.4 | 7   | 4.3 | 1.5 | 0.9 | 21 | 16 | 23  | 238 | 205 | 119 | 51 | 130.2 | 5.3 | 51.4 | 425 | 13.8 | 40.6 | 27.8 | 315 | 20.4 | 0.67 | 143 | 4   | 107 | 9    | 7.4 | 73  | 10.1 | 9.4    | 0.8 | 0.8 |
| 66 M | 165.5 | 47.5 | 17.34 | 9.8  | 66   | 128 | 78  | 94.67 | 52 | 22.8 | 6.7 | 4.4 | 1.9 | 0.9 | 21 | 14 | 13  | 204 | 163 | 55  | 85 | 67    | 6.4 | 46   | 421 | 14.6 | 42.9 | 20.2 | 239 | 13   | 0.65 | 145 | 4.1 | 107 | 9    | 3   | 135 | 11.9 | 11.8   | 0.6 | 0.6 |
| 63 F | 154.1 | 57.7 | 24.3  | 30.1 | 73.5 | 142 | 72  | 95.33 | 63 | 20.6 | 7.3 | 4.1 | 1.3 | 0.6 | 23 | 15 | 17  | 225 | 228 | 137 | 74 | 126.6 | 4.9 | 50   | 425 | 13.6 | 40.5 | 19.5 | 296 | 18.8 | 0.76 | 144 | 4   | 107 | 9.4  | 4.1 | 50  | 9.9  | 12.4   | 0.5 | 0.7 |
| 62 M | 164.4 | 51.6 | 19.09 | 18.6 | 75   | 133 | 75  | 94.33 | 57 | 45   | 7.7 | 4.5 | 1.4 | 0.5 | 29 | 27 | 16  | 285 | 129 | 89  | 35 | 76.2  | 5.6 | 57.1 | 417 | 13.5 | 39.2 | 19.7 | 283 | 21.7 | 0.77 | 142 | 4.1 | 106 | 9.4  | 6.3 | 216 | 11.1 | 10.2   | 0.6 | 0.6 |
| 57 M | 166.4 | 55.3 | 19.97 | 16.1 | 70   | 131 | 80  | 97    | 55 | 9.6  | 7.1 | 4.6 | 1.8 | 0.8 | 18 | 16 | 21  | 115 | 212 | 138 | 66 | 118.4 | 5.1 | 62.2 | 449 | 13.9 | 40.6 | 23.1 | 253 | 17.9 | 0.67 | 145 | 4.2 | 107 | 9.1  | 3.2 | 63  | 9.5  | 17.1   | 0.7 | 0.7 |
| 68 F | 150   | 45.8 | 20.36 | 25   | 67   | 117 | 50  | 72.33 | 80 | 3.9  | 7.4 | 4.6 | 1.6 | 0.5 | 21 | 13 | 18  | 235 | 211 | 151 | 44 | 136.8 | 5.5 | 56.6 | 429 | 13.3 | 39.7 | 27.8 | 343 | 9.7  | 0.7  | 144 | 4   | 104 | 9.1  | 4.9 | 83  | 13.4 | 14.2   | 0.6 | 0.6 |
| 58 M | 170.4 | 81.2 | 27.97 | 25.2 | 95   | 127 | 79  | 95    | 57 | 5.6  | 7.2 | 4.6 | 1.8 | 1.2 | 29 | 19 | 102 | 239 | 213 | 253 | 68 | 94.4  | 5.9 | 49.6 | 445 | 16.1 | 45.5 | 17.8 | 326 | 11.2 | 0.9  | 145 | 4.3 | 107 | 9.1  | 5.9 | 61  | 10.2 | 14.6   | 0.4 | 0.4 |
| 53 M | 161   | 54.5 | 21.03 | 19.8 | 72   | 120 | 69  | 86    | 47 | 15   | 7   | 4.3 | 1.6 | 0.8 | 18 | 27 | 42  | 260 | 166 | 136 | 46 | 92.8  | 5.5 | 68.1 | 485 | 15.4 | 45.4 | 22.8 | 279 | 19.6 | 0.84 | 144 | 4.7 | 108 | 9.1  | 4.8 | 64  | 10.6 | 9.5    | 0.6 | 0.7 |
| 61 M | 168.5 | 60.5 | 21.31 | 17.2 | 81   | 165 | 81  | 109   | 55 | 21.9 | 7.1 | 4.3 | 1.5 | 0.5 | 35 | 32 | 77  | 316 | 197 | 114 | 63 | 111.2 | 7.5 | 63.7 | 429 | 13   | 39   | 30   | 477 | 25.4 | 1.17 | 144 | 3.8 | 107 | 9.5  | 7.9 | 48  | 8    | 10.8   | 0.6 | 0.6 |
| 58 M | 169.3 | 71.8 | 25.05 | 25.7 | 86   | 138 | 88  | 104.7 | 43 | 7    | 7.5 | 4.6 | 1.6 | 0.6 | 21 | 19 | 43  | 233 | 240 | 198 | 57 | 143.4 | 5.8 | 68.8 | 508 | 15.3 | 44.8 | 26.3 | 310 | 17.8 | 0.88 | 144 | 4.1 | 105 | 9.3  | 3.7 | 66  | 13.1 | 10.4   | 0.7 | 0.7 |
| 54 M | 162.2 | 81.8 | 31.09 | 30.9 | 95   | 153 | 100 | 117.7 | 65 | 9.5  | 7.3 | 4.4 | 1.5 | 0.7 | 56 | 64 | 72  | 172 | 165 | 101 | 59 | 85.8  | 7.1 | 72.8 | 498 | 16.4 | 46.2 | 15.2 | 244 | 14   | 0.61 | 143 | 4   | 105 | 8.7  | 5.2 | 42  | 14.2 | 16.1</ |     |     |

|      |       |      |       |      |      |     |     |       |    |      |     |     |     |     |    |    |     |     |     |     |     |       |     |       |     |      |      |      |     |      |      |     |     |     |     |     |     |      |      |     |     |
|------|-------|------|-------|------|------|-----|-----|-------|----|------|-----|-----|-----|-----|----|----|-----|-----|-----|-----|-----|-------|-----|-------|-----|------|------|------|-----|------|------|-----|-----|-----|-----|-----|-----|------|------|-----|-----|
| 62 M | 157   | 52.4 | 21.26 | 15.3 | 69   | 104 | 62  | 76    | 45 | 11.3 | 6.9 | 4.1 | 1.5 | 0.6 | 24 | 23 | 15  | 214 | 197 | 73  | 75  | 107.4 | 6   | 48.8  | 388 | 12.8 | 37.5 | 14.6 | 223 | 21.7 | 0.58 | 142 | 4   | 107 | 8.9 | 3.7 | 105 | 11.4 | 10.7 | 0.6 | 0.7 |
| 67 F | 147.8 | 58.3 | 26.69 | 35.4 | 84   | 157 | 101 | 119.7 | 92 | 43.5 | 8.3 | 4.6 | 1.2 | 0.5 | 22 | 21 | 38  | 236 | 281 | 136 | 60  | 193.8 | 5.1 | 100.2 | 499 | 15.4 | 46.4 | 30.1 | 337 | 16.7 | 0.79 | 145 | 4.2 | 104 | 9.8 | 6.3 | 64  | 8    | 9    | 1   | 0.7 |
| 68 M | 158.9 | 67.8 | 26.85 | 29.7 | 90   | 128 | 74  | 92    | 52 | 35.7 | 7.4 | 4.5 | 1.6 | 0.9 | 22 | 28 | 29  | 255 | 202 | 110 | 59  | 121   | 4.5 | 65.2  | 508 | 16.1 | 47.1 | 16.5 | 267 | 14.5 | 0.68 | 143 | 3.9 | 107 | 9.3 | 5.7 | 89  | 10.7 | 10.6 | 0.7 | 0.9 |
| 63 M | 167.3 | 64.1 | 22.9  | 21.1 | 80   | 147 | 84  | 105   | 55 | 22.6 | 7.3 | 4.5 | 1.6 | 0.8 | 19 | 12 | 50  | 248 | 224 | 100 | 70  | 134   | 5.5 | 44.9  | 412 | 14.9 | 42.3 | 20.8 | 271 | 11.3 | 0.76 | 141 | 4.4 | 102 | 9.4 | 5.1 | 71  | 13.7 | 13.4 | 0.5 | 0.7 |
| 54 F | 151.8 | 53.3 | 23.13 | 28.8 | 73   | 135 | 83  | 100.3 | 54 | 27.6 | 6.8 | 3.9 | 1.3 | 0.6 | 19 | 16 | 30  | 224 | 189 | 64  | 63  | 113.2 | 4.9 | 61.2  | 426 | 13.3 | 40.2 | 16.9 | 343 | 15   | 0.69 | 143 | 3.7 | 107 | 8.7 | 4.6 | 73  | 9.2  | 9.2  | 0.5 | 0.6 |
| 65 F | 156.5 | 44.5 | 18.17 | 19.6 | 63   | 107 | 61  | 76.33 | 61 | 29.4 | 6.9 | 4.5 | 1.9 | 1.1 | 22 | 16 | 12  | 169 | 206 | 53  | 78  | 117.4 | 5.1 | 38.7  | 415 | 12.9 | 38.1 | 17.6 | 223 | 15.7 | 0.71 | 144 | 4   | 106 | 9.3 | 4.9 | 66  | 11.4 | 10.6 | 0.7 | 0.6 |
| 69 F | 155.1 | 54.5 | 22.66 | 31.4 | 77   | 135 | 63  | 87    | 61 | 36   | 7.8 | 4.4 | 1.3 | 0.8 | 26 | 19 | 25  | 202 | 239 | 127 | 62  | 151.6 | 5.9 | 49.6  | 457 | 14.4 | 42.9 | 21.7 | 267 | 15.3 | 0.62 | 141 | 4.2 | 101 | 10  | 5.4 | 61  | 16.7 | 14.9 | 1.2 | 1.1 |
| 63 M | 172.4 | 85.4 | 28.73 | 29.3 | 98   | 125 | 61  | 82.33 | 48 | 5.9  | 7.7 | 4.6 | 1.5 | 0.5 | 17 | 21 | 26  | 195 | 177 | 100 | 53  | 104   | 6   | 62.8  | 471 | 14.9 | 43.7 | 25.2 | 361 | 15.2 | 0.67 | 142 | 3.9 | 105 | 9.4 | 5   | 85  | 12.1 | 14.9 | 0.9 | 0.7 |
| 67 F | 153.1 | 59.9 | 25.56 | 31   | 73   | 131 | 57  | 81.67 | 54 | 51.1 | 7.2 | 4.4 | 1.6 | 0.5 | 25 | 16 | 29  | 268 | 270 | 50  | 86  | 174   | 5.2 | 45.5  | 407 | 13   | 39.3 | 17.5 | 279 | 12.9 | 0.66 | 144 | 4.4 | 107 | 9.3 | 3.7 | 119 | 14.7 | 12.7 | 0.9 | 1.1 |
| 65 F | 149   | 56.7 | 25.54 | 34.1 | 79   | 120 | 63  | 82    | 50 | 17.1 | 8.3 | 4.4 | 1.1 | 0.8 | 21 | 19 | 16  | 287 | 214 | 167 | 38  | 142.6 | 5.2 | 54    | 437 | 13.9 | 41.2 | 24.1 | 305 | 9.2  | 0.57 | 142 | 4   | 105 | 9.6 | 5.4 | 58  | 10   | 9.7  | 0.7 | 0.9 |
| 67 M | 164.6 | 60.5 | 22.33 | 24.8 | 81   | 173 | 74  | 107   | 53 | 20.4 | 7.4 | 4.6 | 1.6 | 0.6 | 19 | 17 | 66  | 250 | 222 | 238 | 57  | 117.4 | 7.1 | 58.2  | 448 | 14.2 | 41.5 | 23.8 | 279 | 15.8 | 0.92 | 141 | 4.4 | 103 | 9.7 | 5.6 | 52  | 13.5 | 13.1 | 0.5 | 1   |
| 64 F | 150.1 | 57.1 | 25.34 | 32.7 | 78   | 121 | 71  | 87.67 | 65 | 21.5 | 7.4 | 4.5 | 1.6 | 1.4 | 19 | 24 | 50  | 205 | 258 | 317 | 47  | 147.6 | 5.5 | 57    | 426 | 13.6 | 39.2 | 33.8 | 250 | 13.2 | 0.69 | 141 | 4.3 | 104 | 9.7 | 6.1 | 55  | 22.2 | 23.6 | 0.9 | 1.2 |
| 67 F | 143.9 | 44.5 | 21.49 | 28.1 | 70   | 129 | 61  | 83.67 | 66 | 11.8 | 7.6 | 4.5 | 1.5 | 0.9 | 22 | 12 | 25  | 301 | 312 | 66  | 55  | 243.8 | 5.4 | 59.1  | 431 | 12.9 | 38   | 27.7 | 337 | 14.5 | 0.53 | 141 | 3.9 | 109 | 9.4 | 5.2 | 80  | 10.8 | 9.9  | 0.6 | 0.7 |
| 63 F | 147.7 | 39.9 | 18.29 | 19.7 | 63   | 125 | 67  | 86.33 | 58 | 34.6 | 7   | 3.7 | 1.1 | 0.7 | 30 | 13 | 18  | 349 | 187 | 98  | 58  | 109.4 | 5.3 | 78.6  | 386 | 11   | 33.6 | 27.1 | 337 | 20.2 | 0.78 | 141 | 4.1 | 106 | 8.5 | 3.7 | 134 | 15.2 | 15.3 | 0.6 | 0.7 |
| 57 M | 165   | 57.9 | 21.27 | 15   | 80   | 124 | 69  | 87.33 | 65 | 7.8  | 6.8 | 4.3 | 1.7 | 0.6 | 24 | 20 | 87  | 162 | 174 | 41  | 70  | 95.8  | 5.6 | 48.6  | 420 | 15.3 | 44.5 | 15.2 | 375 | 11.9 | 0.83 | 143 | 4.3 | 108 | 9.1 | 6   | 95  | 10.9 | 10.9 | 0.5 | 0.7 |
| 54 F | 147.3 | 45.6 | 21.02 | 25.1 | 64   | 104 | 57  | 72.67 | 63 | 22.7 | 6.7 | 4.2 | 1.7 | 0.6 | 20 | 18 | 16  | 182 | 196 | 93  | 76  | 101.4 | 4.9 | 49.4  | 401 | 13.3 | 39.3 | 28   | 305 | 12   | 0.63 | 144 | 4   | 108 | 8.9 | 3.4 | 157 | 13.9 | 13.1 | 0.4 | 0.4 |
| 54 M | 172.5 | 66   | 22.18 | 17.5 | 77   | 120 | 66  | 84    | 62 | 9.7  | 6.7 | 4.2 | 1.7 | 0.8 | 12 | 12 | 28  | 213 | 220 | 86  | 63  | 139.8 | 5.3 | 66.4  | 460 | 14.5 | 43.2 | 27.4 | 264 | 14.5 | 1.05 | 143 | 4.3 | 109 | 9.4 | 4   | 106 | 12.6 | 10.1 | 0.4 | 0.4 |
| 50 F | 158.7 | 54.9 | 21.8  | 25.9 | 68.5 | 98  | 53  | 68    | 63 | 10.5 | 6.8 | 4.1 | 1.5 | 0.4 | 18 | 12 | 13  | 242 | 211 | 67  | 65  | 132.6 | 5.2 | 39.7  | 376 | 10.6 | 33   | 25.4 | 287 | 16.1 | 0.6  | 142 | 4   | 105 | 9.1 | 4.4 | 105 | 9.3  | 9.6  | 0.7 | 0.6 |
| 60 M | 164.1 | 66.4 | 24.66 | 24.6 | 84   | 142 | 77  | 98.67 | 54 | 7.5  | 7.3 | 4.5 | 1.6 | 1.7 | 23 | 23 | 25  | 203 | 227 | 88  | 47  | 162.4 | 5.1 | 45.9  | 520 | 15.3 | 45.5 | 18.4 | 247 | 17.2 | 0.93 | 144 | 3.8 | 106 | 9.2 | 6   | 85  | 10.8 | 11.1 | 0.6 | 0.5 |
| 61 F | 149.5 | 45.9 | 20.54 | 25.6 | 66   | 104 | 66  | 78.67 | 69 | 8.8  | 7.6 | 4.4 | 1.4 | 0.8 | 20 | 12 | 20  | 133 | 223 | 101 | 51  | 151.8 | 5.4 | 44.4  | 413 | 13.1 | 38.8 | 23.2 | 292 | 15.3 | 0.64 | 143 | 4.4 | 105 | 9.6 | 5.1 | 123 | 14.4 | 10.3 | 0.5 | 0.5 |
| 63 M | 164.3 | 62.2 | 23.04 | 23.9 | 85   | 117 | 67  | 83.67 | 70 | 26.2 | 7.3 | 4.1 | 1.3 | 0.4 | 22 | 15 | 22  | 220 | 246 | 109 | 45  | 179.2 | 5.4 | 137.1 | 439 | 15.4 | 44   | 22.2 | 331 | 10.3 | 0.81 | 141 | 4.5 | 107 | 8.9 | 5.8 | 49  | 8.2  | 10.2 | 1.5 | 1.6 |
| 60 F | 148.1 | 51.3 | 23.39 | 31.2 | 74   | 133 | 61  | 85    | 57 | 12.2 | 8.1 | 4.3 | 1.1 | 0.4 | 18 | 14 | 19  | 235 | 303 | 295 | 56  | 188   | 5.5 | 61.3  | 367 | 12.3 | 36.5 | 26.7 | 337 | 15.1 | 0.66 | 142 | 4   | 105 | 9.4 | 4.6 | 92  | 14.1 | 11.5 | 0.6 | 0.7 |
| 56 F | 148.1 | 46.4 | 21.15 | 23.9 | 69   | 98  | 41  | 60    | 58 | 22.9 | 7   | 4.3 | 1.6 | 1   | 24 | 19 | 19  | 226 | 174 | 68  | 65  | 95.4  | 5.3 | 50.8  | 350 | 11.7 | 34.9 | 22.7 | 247 | 12.9 | 0.64 | 143 | 4.1 | 107 | 9.3 | 3.5 | 50  | 13.3 | 11.2 | 0.4 | 0.5 |
| 69 F | 153.3 | 44.6 | 18.98 | 23.8 | 68   | 114 | 73  | 86.67 | 66 | 48   | 7.3 | 4.4 | 1.5 | 0.6 | 29 | 19 | 22  | 280 | 249 | 102 | 83  | 145.6 | 5.4 | 75.3  | 439 | 13.9 | 42.6 | 28.8 | 287 | 14   | 0.6  | 143 | 4.3 | 106 | 9.6 | 3.5 | 105 | 12.2 | 12.4 | 0.7 | 0.6 |
| 63 F | 156.4 | 60.8 | 24.86 | 31.6 | 77   | 108 | 64  | 78.67 | 71 | 8.3  | 8   | 4.7 | 1.4 | 0.8 | 24 | 31 | 31  | 251 | 214 | 164 | 67  | 114.2 | 8   | 67.6  | 494 | 15   | 43.2 | 21.5 | 331 | 20.8 | 0.67 | 141 | 3.8 | 104 | 9.4 | 3.9 | 69  | 8.3  | 8    | 0.8 | 0.7 |
| 62 M | 165.7 | 72.3 | 26.33 | 21.4 | 83   | 127 | 82  | 97    | 58 | 11.4 | 7.4 | 4.7 | 1.7 | 1   | 20 | 25 | 35  | 207 | 187 | 93  | 76  | 92.4  | 4.6 | 44    | 433 | 15   | 42.8 | 16   | 287 | 12.8 | 0.74 | 145 | 4.2 | 105 | 9.6 | 6.9 | 65  | 12.5 | 20.3 | 0.7 | 0.8 |
| 66 F | 152.3 | 45.5 | 19.62 | 24.4 | 65   | 131 | 62  | 85    | 63 | 23.6 | 7.8 | 4.4 | 1.3 | 0.6 | 21 | 13 | 16  | 276 | 223 | 92  | 72  | 132.6 | 5.3 | 56.6  | 453 | 14.2 | 42.7 | 23.3 | 403 | 13.9 | 0.66 | 142 | 4.4 | 101 | 9.8 | 3.9 | 126 | 17.9 | 15.8 | 0.9 | 1.2 |
| 63 F | 155.3 | 42.8 | 17.75 | 19.9 | 58   | 96  | 42  | 60    | 71 | 35.3 | 7.4 | 4.7 | 1.7 | 1   | 23 | 15 | 15  | 190 | 230 | 57  | 117 | 101.6 | 5   | 37.5  | 404 | 13   | 38.5 | 18.1 | 283 | 10.1 | 0.61 | 143 | 4.9 | 105 | 9.8 | 4.2 | 63  | 14.2 | 14.4 | 0.6 | 0.7 |
| 50 M | 172.4 | 57.7 | 19.41 | 19.2 | 72   | 138 | 68  | 91.33 | 63 | 14.9 | 7.8 | 4.7 | 1.5 | 0.6 | 32 | 22 | 129 | 278 | 167 | 66  | 69  | 84.8  | 5   | 77.5  | 479 | 17.8 | 50.1 | 31.3 | 271 | 9.4  | 0.82 | 144 | 5   | 102 | 10  | 7.4 | 67  | 11.8 | 12.8 | 0.5 | 0.6 |
| 52 M | 160.5 | 69.1 | 26.82 | 24.1 | 88   | 111 | 60  | 77    | 58 | 22.7 | 7.4 | 4.1 | 1.2 | 1.1 | 22 | 22 | 29  | 220 | 252 | 200 | 45  | 167   | 4.7 | 80.7  | 529 | 16   | 46.7 | 24   | 260 | 11.4 | 0.92 | 143 | 4   | 103 | 9.3 | 6.2 | 65  | 11.3 | 11.4 | 0.6 | 0.7 |
| 51 M | 156.1 | 66.8 | 27.41 | 32.1 | 95   | 137 | 78  | 97.67 | 61 | 19.8 | 7.3 | 4.7 | 1.8 | 0.4 | 29 | 34 | 371 | 221 | 199 | 80  | 77  | 106   | 4.4 | 64.9  | 448 | 15.1 | 43.8 | 20.5 | 301 | 14.6 | 0.59 | 147 | 4.1 | 107 | 9.3 | 6.9 | 82  | 11.4 | 10.7 | 0.7 | 0.6 |
| 53 M | 167.5 | 70.2 | 25.02 | 23.6 | 82   | 136 | 88  | 104   | 59 | 5.7  | 7.9 | 4.4 | 1.3 | 1   | 22 | 27 | 31  | 204 | 204 | 130 | 79  | 99    | 5.1 | 97.3  | 491 | 15.7 | 45.7 | 33.1 | 283 | 16.3 | 0.88 | 146 | 4.1 | 105 | 9.7 | 5.9 | 84  | 13.1 | 12.1 | 0.5 | 0.5 |
| 67 M | 166.7 | 52   | 18.71 | 19.2 | 68   | 129 | 67  | 87.67 | 62 | 13.5 | 7.3 | 4.4 | 1.5 | 1.6 | 36 | 21 | 25  | 238 | 218 | 86  | 64  | 136.8 | 4.9 | 73.9  | 456 | 14.4 | 43.2 | 26.7 | 315 | 19.8 | 0.8  | 146 | 4.6 | 104 | 9.7 | 5.8 | 110 | 14.7 | 14.6 | 0.7 | 0.9 |
| 49 M | 172.9 | 84   | 28.1  | 25.3 | 91   | 104 | 56  | 72    | 69 | 11.9 | 7.8 | 4.8 | 1.6 | 1.2 | 31 | 41 | 62  | 136 | 276 | 162 | 56  | 187.6 | 4.8 | 60    | 490 | 15.8 | 45.3 | 27.3 | 301 | 14.1 | 0.93 | 145 | 3.6 | 107 | 9.8 | 6.6 | 50  | 16.8 | 16.9 | 0.6 | 0.5 |
| 60 M | 163.7 | 62.2 | 23.21 | 23.1 | 82   | 115 | 69  | 84.33 | 61 | 38.1 | 7.2 | 4.4 | 1.6 | 0.6 | 32 | 26 | 52  | 190 | 191 | 47  | 84  | 97.6  | 4.7 | 54.2  | 459 | 14.6 | 42.8 | 25   | 368 | 12.5 | 0.96 | 143 | 3.8 | 106 | 9.7 | 6.4 | 80  | 14.6 | 15.3 | 0.7 | 0.7 |
| 60 F | 149.1 | 50.3 | 22.63 | 32   | 68   | 128 | 73  | 91.33 | 58 | 17.5 | 7.6 | 4.4 | 1.4 | 0.6 | 27 | 19 | 21  | 202 | 213 | 104 | 53  | 139.2 | 5.5 | 60.5  | 391 | 12.8 | 37.9 | 15.6 | 296 | 13.1 | 0.56 | 145 | 3.7 | 104 |     |     |     |      |      |     |     |

|      |       |      |       |      |      |     |     |       |    |      |     |     |     |     |    |     |     |     |     |     |    |       |     |      |     |      |      |      |     |      |      |     |     |     |     |     |     |      |      |     |     |
|------|-------|------|-------|------|------|-----|-----|-------|----|------|-----|-----|-----|-----|----|-----|-----|-----|-----|-----|----|-------|-----|------|-----|------|------|------|-----|------|------|-----|-----|-----|-----|-----|-----|------|------|-----|-----|
| 68 M | 161.2 | 68.7 | 26.44 | 26.4 | 84.5 | 139 | 76  | 97    | 55 | 6.4  | 7.3 | 4.4 | 1.5 | 0.9 | 25 | 21  | 140 | 265 | 195 | 89  | 59 | 118.2 | 5.3 | 59.8 | 451 | 15.3 | 44.6 | 23.7 | 271 | 16.3 | 0.89 | 141 | 4   | 98  | 9.4 | 5.9 | 95  | 10.6 | 11.3 | 0.7 | 0.6 |
| 69 F | 148.5 | 54.3 | 24.62 | 32.9 | 73   | 98  | 57  | 70.67 | 48 | 21.3 | 7.5 | 4.4 | 1.4 | 0.8 | 21 | 7   | 13  | 287 | 197 | 157 | 61 | 104.6 | 5.5 | 35.5 | 416 | 13.8 | 41.2 | 26.5 | 326 | 11.8 | 0.52 | 142 | 5.2 | 103 | 9.2 | 3.7 | 87  | 9.2  | 11.7 | 0.6 | 0.7 |
| 68 F | 146.3 | 41.7 | 19.48 | 22.7 | 61   | 103 | 53  | 69.67 | 76 | 32.2 | 7.4 | 4.4 | 1.5 | 0.9 | 25 | 18  | 20  | 171 | 225 | 67  | 90 | 121.6 | 5.2 | 51   | 429 | 13.7 | 41.5 | 17.8 | 264 | 16.8 | 0.66 | 142 | 4.1 | 101 | 9.2 | 4.2 | 77  | 14.5 | 10.4 | 0.7 | 1   |
| 54 M | 166.5 | 71   | 25.61 | 26.2 | 85   | 118 | 73  | 88    | 58 | 7.6  | 7.4 | 4.5 | 1.6 | 0.6 | 21 | 27  | 57  | 268 | 232 | 291 | 39 | 134.8 | 5.2 | 92.1 | 516 | 16.1 | 48.5 | 26.3 | 296 | 11.3 | 0.59 | 142 | 4   | 103 | 8.8 | 6.3 | 55  | 8.3  | 9.1  | 0.8 | 0.9 |
| 57 M | 172.1 | 85   | 28.7  | 27.9 | 94   | 139 | 76  | 97    | 72 | 3.3  | 7.6 | 5   | 1.9 | 0.6 | 34 | 56  | 61  | 177 | 274 | 235 | 46 | 181   | 5.7 | 61   | 504 | 16.5 | 45.9 | 21.7 | 267 | 17.7 | 0.91 | 144 | 5   | 104 | 9.9 | 7.6 | 46  | 14.1 | 15.7 | 1.2 | 0.8 |
| 52 M | 157.7 | 60.9 | 24.49 | 20   | 82   | 136 | 85  | 102   | 46 | 13.7 | 7.4 | 4.7 | 1.7 | 0.7 | 23 | 22  | 26  | 225 | 191 | 107 | 50 | 119.6 | 4.4 | 55.8 | 527 | 16.6 | 47.1 | 21.5 | 271 | 16.3 | 0.93 | 142 | 3.6 | 103 | 9.1 | 4.9 | 88  | 7.9  | 9.6  | 0.7 | 0.7 |
| 68 F | 153.3 | 54.2 | 23.06 | 30.8 | 76   | 111 | 58  | 75.67 | 77 | 14.4 | 7.8 | 4.7 | 1.5 | 0.9 | 18 | 14  | 29  | 462 | 249 | 130 | 46 | 177   | 5.6 | 63.4 | 399 | 13   | 38.4 | 28.9 | 301 | 11.8 | 0.45 | 142 | 4   | 101 | 9.5 | 3.7 | 63  | 13.4 | 9.6  | 0.7 | 0.6 |
| 67 M | 166.1 | 68.8 | 24.94 | 21.4 | 87   | 153 | 80  | 104.3 | 52 | 23.9 | 7.2 | 4.4 | 1.6 | 0.7 | 31 | 47  | 34  | 244 | 170 | 69  | 40 | 116.2 | 6.5 | 61.2 | 468 | 15.4 | 45.5 | 17.1 | 424 | 14.2 | 0.73 | 143 | 4.4 | 102 | 9.1 | 4.5 | 101 | 14.6 | 13.2 | 0.7 | 2.1 |
| 56 F | 151.1 | 47.6 | 20.85 | 29.8 | 69   | 125 | 80  | 95    | 70 | 4.6  | 8   | 4.7 | 1.4 | 0.7 | 18 | 17  | 15  | 347 | 211 | 80  | 41 | 154   | 5.2 | 58.7 | 464 | 14.1 | 42.1 | 26   | 337 | 11.8 | 0.63 | 143 | 4.2 | 103 | 9.8 | 4.9 | 55  | 16.5 | 14   | 0.6 | 1.6 |
| 52 M | 161.1 | 74.5 | 28.71 | 29.9 | 90   | 136 | 77  | 96.67 | 59 | 4.4  | 7.2 | 4.3 | 1.5 | 0.3 | 23 | 56  | 48  | 319 | 249 | 182 | 45 | 167.6 | 6.6 | 108  | 510 | 16.4 | 48.7 | 41.6 | 283 | 11.8 | 0.95 | 143 | 4.2 | 107 | 9   | 6.2 | 54  | 15.8 | 15.7 | 0.9 | 0.9 |
| 65 F | 156.5 | 56.1 | 22.91 | 29.8 | 73   | 109 | 59  | 75.67 | 60 | 43.8 | 7.1 | 4.4 | 1.6 | 0.8 | 22 | 19  | 19  | 242 | 287 | 68  | 78 | 195.4 | 5.5 | 58.6 | 423 | 13   | 39.7 | 30.1 | 349 | 15.1 | 0.5  | 145 | 4.5 | 105 | 9.5 | 5   | 63  | 10.5 | 7.6  | 1.5 | 0.7 |
| 69 F | 140.4 | 56.3 | 28.56 | 34.9 | 79   | 145 | 83  | 103.7 | 97 | 11   | 7.6 | 4.7 | 1.6 | 1.1 | 35 | 31  | 23  | 396 | 180 | 103 | 68 | 91.4  | 5.8 | 82.8 | 431 | 13.7 | 40.8 | 28.8 | 271 | 11   | 0.54 | 145 | 4   | 101 | 9.7 | 3.9 | 70  | 14.8 | 11.5 | 0.7 | 0.5 |
| 67 F | 146.1 | 50.6 | 23.71 | 30.1 | 70   | 155 | 96  | 115.7 | 61 | 28.1 | 6.4 | 4   | 1.7 | 0.6 | 17 | 23  | 32  | 290 | 203 | 74  | 92 | 96.2  | 5.6 | 93.7 | 389 | 12   | 35.3 | 43.5 | 414 | 18.3 | 0.49 | 145 | 4   | 105 | 9.3 | 3.8 | 45  | 15.5 | 15.3 | 0.5 | 0.7 |
| 64 M | 174.1 | 82.6 | 27.25 | 27.1 | 94   | 122 | 77  | 92    | 56 | 4.8  | 7.8 | 4.6 | 1.4 | 0.8 | 32 | 34  | 27  | 208 | 206 | 106 | 49 | 135.8 | 5.8 | 79.7 | 470 | 15.6 | 46.9 | 27.1 | 394 | 14.3 | 1.14 | 144 | 4.5 | 106 | 9.1 | 8.1 | 98  | 12.1 | 12.5 | 0.7 | 0.9 |
| 66 F | 148.5 | 52.6 | 23.85 | 31.2 | 74.5 | 125 | 79  | 94.33 | 56 | 10.3 | 7.3 | 4.6 | 1.7 | 0.7 | 29 | 16  | 18  | 185 | 203 | 68  | 68 | 121.4 | 5.4 | 39.4 | 425 | 15   | 43.2 | 20.5 | 279 | 13.6 | 0.64 | 145 | 3.9 | 105 | 9.4 | 5.1 | 48  | 14.9 | 16.3 | 0.8 | 0.8 |
| 57 F | 156.7 | 55   | 22.4  | 29.5 | 74   | 141 | 59  | 86.33 | 68 | 19   | 7.4 | 4.4 | 1.5 | 0.6 | 34 | 40  | 22  | 535 | 192 | 405 | 36 | 75    | 5.4 | 50.7 | 492 | 15.1 | 43.9 | 20.1 | 271 | 10.1 | 0.53 | 144 | 4.6 | 104 | 9.4 | 3.1 | 78  | 12.6 | 15.4 | 0.9 | 0.8 |
| 66 M | 162.5 | 62.2 | 23.56 | 24.3 | 84   | 148 | 68  | 94.67 | 55 | 12.5 | 8   | 4.6 | 1.4 | 0.6 | 29 | 23  | 47  | 290 | 198 | 108 | 66 | 110.4 | 5.3 | 62.4 | 482 | 16.2 | 46.8 | 31   | 310 | 13   | 0.69 | 144 | 4.5 | 104 | 9.4 | 5   | 82  | 12.4 | 14.2 | 0.8 | 0.6 |
| 68 F | 150.9 | 55.9 | 24.55 | 32.4 | 79   | 165 | 100 | 121.7 | 67 | 49.6 | 8.5 | 4.4 | 1.1 | 0.7 | 25 | 18  | 22  | 310 | 187 | 371 | 38 | 74.8  | 5.6 | 75.4 | 491 | 14   | 42.9 | 27.8 | 361 | 12   | 0.76 | 144 | 4.3 | 103 | 9.7 | 7.1 | 73  | 12.8 | 12.2 | 1.2 | 1   |
| 41 M | 175.3 | 87.6 | 28.51 | 34.5 | 89   | 102 | 50  | 67.33 | 57 | 2.7  | 7.6 | 4.7 | 1.6 | 1.4 | 53 | 96  | 64  | 184 | 287 | 122 | 50 | 212.6 | 5.2 | 54.6 | 559 | 17.5 | 50.4 | 20.9 | 253 | 16.6 | 0.75 | 142 | 4   | 102 | 9.4 | 7.3 | 67  | 11.6 | 12.7 | 0.5 | 1   |
| 58 M | 174.7 | 70.3 | 23.03 | 23.5 | 86   | 107 | 58  | 74.33 | 62 | 10.1 | 7.3 | 4.3 | 1.4 | 0.8 | 25 | 19  | 22  | 281 | 192 | 112 | 57 | 112.6 | 5.4 | 71   | 495 | 16.1 | 47.2 | 27.8 | 287 | 15.7 | 0.93 | 143 | 4.1 | 102 | 9   | 4.4 | 65  | 10.4 | 8.1  | 0.7 | 0.8 |
| 66 F | 147.6 | 45.2 | 20.75 | 26.8 | 71   | 118 | 66  | 83.33 | 56 | 12.4 | 7.5 | 4.5 | 1.5 | 0.5 | 22 | 16  | 40  | 299 | 241 | 153 | 63 | 147.4 | 5.2 | 48.7 | 366 | 12   | 36.4 | 32.6 | 315 | 14.4 | 0.4  | 144 | 4.2 | 102 | 9.4 | 3.8 | 58  | 13.6 | 13.6 | 0.8 | 0.8 |
| 67 F | 144.1 | 45   | 21.67 | 24.9 | 63   | 123 | 76  | 91.67 | 52 | 14.5 | 7   | 4.5 | 1.8 | 0.7 | 25 | 16  | 21  | 195 | 220 | 111 | 51 | 146.8 | 5.4 | 68.3 | 439 | 13.3 | 39.9 | 25.1 | 247 | 12.1 | 0.67 | 147 | 4.1 | 106 | 9.5 | 4.8 | 60  | 12.9 | 15   | 0.7 | 0.6 |
| 68 F | 149.9 | 46.7 | 20.78 | 25.9 | 63   | 133 | 63  | 86.33 | 61 | 33.4 | 7   | 4.2 | 1.5 | 0.7 | 21 | 16  | 18  | 173 | 224 | 71  | 71 | 138.8 | 5.4 | 45.2 | 392 | 13.3 | 39.6 | 18.9 | 271 | 11.1 | 0.63 | 143 | 4   | 103 | 8.8 | 4   | 71  | 14.2 | 13.9 | 0.7 | 0.8 |
| 58 M | 168.1 | 60.7 | 21.48 | 18.7 | 73   | 131 | 81  | 97.67 | 63 | 7.4  | 7   | 4.4 | 1.7 | 0.8 | 26 | 24  | 21  | 191 | 191 | 102 | 70 | 100.6 | 5.3 | 37.2 | 454 | 15   | 43.5 | 21.4 | 244 | 14.7 | 0.85 | 144 | 4.3 | 102 | 8.9 | 4.3 | 100 | 17.8 | 17.3 | 0.7 | 0.8 |
| 57 F | 156.8 | 51.4 | 20.91 | 25.5 | 65   | 103 | 68  | 79.67 | 49 | 11.9 | 7.5 | 4.3 | 1.3 | 0.7 | 22 | 15  | 12  | 206 | 218 | 67  | 96 | 108.6 | 5.1 | 38.1 | 425 | 13.2 | 39.6 | 21.1 | 320 | 15   | 0.54 | 144 | 4.1 | 103 | 8.9 | 3.3 | 119 | 11.4 | 14.9 | 0.7 | 0.7 |
| 66 F | 154.5 | 58.8 | 24.63 | 30.6 | 72   | 128 | 53  | 78    | 58 | 31.6 | 7.7 | 4.5 | 1.4 | 0.5 | 23 | 22  | 14  | 159 | 223 | 79  | 55 | 152.2 | 5.6 | 41.1 | 419 | 13.5 | 41.1 | 30.3 | 287 | 14.6 | 0.56 | 148 | 5.4 | 106 | 9.6 | 5.2 | 129 | 7.7  | 8.7  | 1.1 | 1   |
| 57 F | 147.3 | 52.9 | 24.38 | 32.2 | 71   | 85  | 51  | 62.33 | 61 | 4.5  | 7.1 | 4.2 | 1.4 | 0.6 | 79 | 121 | 97  | 210 | 200 | 58  | 62 | 126.4 | 5   | 37.5 | 413 | 13.2 | 40.8 | 27.5 | 275 | 15.2 | 0.6  | 144 | 4   | 103 | 8.9 | 3.5 | 98  | 12.3 | 11.6 | 0.7 | 0.6 |
| 51 F | 156   | 71.9 | 29.54 | 34.4 | 85   | 179 | 115 | 136.3 | 60 | 3.2  | 7.8 | 4.7 | 1.5 | 0.5 | 19 | 14  | 23  | 192 | 286 | 90  | 62 | 206   | 5.4 | 52   | 425 | 12.6 | 38.6 | 37.9 | 271 | 16.4 | 0.58 | 142 | 4.2 | 101 | 9.3 | 4.4 | 71  | 17.5 | 16.2 | 0.8 | 0.7 |
| 61 F | 163.9 | 69.8 | 25.98 | 38.9 | 85   | 107 | 57  | 73.67 | 63 | 6.4  | 7.5 | 4.3 | 1.3 | 0.8 | 21 | 18  | 14  | 228 | 184 | 95  | 60 | 105   | 4.9 | 42.4 | 423 | 13.5 | 39.5 | 26.8 | 239 | 12.2 | 0.67 | 143 | 4.2 | 103 | 9.3 | 4.2 | 97  | 11.5 | 11.1 | 0.7 | 0.8 |
| 67 M | 153.3 | 59.8 | 25.45 | 29.5 | 86   | 154 | 91  | 112   | 70 | 36.8 | 8.1 | 4.5 | 1.3 | 0.5 | 25 | 15  | 49  | 155 | 183 | 184 | 48 | 98.2  | 5   | 49.4 | 504 | 14.5 | 43.6 | 31.1 | 301 | 13.5 | 0.65 | 143 | 4.4 | 105 | 9.2 | 5.2 | 81  | 12.9 | 9.5  | 0.9 | 1   |
| 60 M | 163.6 | 70.8 | 26.45 | 29.5 | 89   | 125 | 87  | 99.67 | 65 | 180  | 7.7 | 4.5 | 1.4 | 0.8 | 42 | 46  | 83  | 237 | 234 | 289 | 51 | 125.2 | 5.5 | 65.4 | 490 | 15.5 | 45.1 | 18.3 | 287 | 13.8 | 0.97 | 142 | 4.5 | 103 | 9.9 | 6.1 | 77  | 15.5 | 14.4 | 0.6 | 0.8 |
| 56 M | 168.3 | 85.6 | 30.22 | 32.8 | 97   | 138 | 73  | 94.67 | 66 | 14.3 | 8   | 5   | 1.7 | 1.7 | 37 | 47  | 22  | 219 | 157 | 118 | 53 | 80.4  | 4.9 | 60.2 | 521 | 17.5 | 49.8 | 18.4 | 315 | 16.6 | 0.86 | 146 | 4.6 | 102 | 9.9 | 6.4 | 141 | 13.2 | 14   | 0.8 | 0.5 |
| 66 M | 172.1 | 73.7 | 24.88 | 29.5 | 89   | 134 | 80  | 98    | 65 | 3.1  | 8   | 4.8 | 1.5 | 1.4 | 30 | 27  | 29  | 224 | 230 | 83  | 56 | 157.4 | 4.8 | 59.6 | 459 | 16   | 46.4 | 19.1 | 326 | 18.2 | 0.86 | 144 | 4.4 | 101 | 9.5 | 6.9 | 40  | 10.6 | 9.7  | 1.2 | 1.2 |
| 63 M | 165.9 | 70.8 | 25.72 | 27.4 | 82.5 | 116 | 63  | 80.67 | 49 | 17.2 | 7.8 | 4.4 | 1.3 | 0.8 | 21 | 15  | 21  | 205 | 236 | 83  | 59 | 160.4 | 5.5 | 65.8 | 451 | 14.5 | 42.3 | 29.6 | 436 | 12.9 | 1.15 | 144 | 4.4 | 105 | 9.5 | 6.1 | 101 | 15.9 | 16.5 | 0.8 | 0.7 |
| 62 F | 144.1 | 46.5 | 22.39 | 29.3 | 67.5 | 121 | 75  | 90.33 | 67 | 9.4  | 7.5 | 4.6 | 1.6 | 1.1 | 35 | 33  | 21  | 178 | 231 | 80  | 85 | 130   | 5.7 | 58.2 | 450 | 13.4 | 41.1 | 39.5 | 355 | 14   | 0.72 | 144 | 4.8 | 100 | 9.9 | 5.6 | 98  | 12.1 | 11.9 | 0.8 | 0.7 |
| 42 F | 148.6 | 59.9 | 27.13 | 39   | 75   | 119 | 75  | 89.67 | 64 | 7.2  | 7.6 | 4.6 | 1.5 | 0.8 | 34 | 42  | 37  | 157 | 222 | 86  | 85 | 119.8 | 7.2 | 70.2 | 490 | 15.8 | 47   | 32.3 | 219 | 11.9 | 0.56 | 143 | 3.  |     |     |     |     |      |      |     |     |

|      |       |      |       |      |      |     |    |       |    |      |     |     |     |     |    |    |     |     |     |     |     |       |     |       |     |      |      |      |     |      |      |     |     |     |      |     |     |      |      |     |     |
|------|-------|------|-------|------|------|-----|----|-------|----|------|-----|-----|-----|-----|----|----|-----|-----|-----|-----|-----|-------|-----|-------|-----|------|------|------|-----|------|------|-----|-----|-----|------|-----|-----|------|------|-----|-----|
| 66 F | 152.1 | 55.6 | 24.03 | 28.8 | 73   | 121 | 70 | 87    | 57 | 14.7 | 7.5 | 4.2 | 1.3 | 1.2 | 25 | 16 | 27  | 332 | 217 | 81  | 60  | 140.8 | 4.7 | 54.7  | 320 | 11.5 | 33.2 | 16.4 | 375 | 12.6 | 0.53 | 143 | 4.5 | 104 | 9.2  | 3.3 | 64  | 10.3 | 10.6 | 0.7 | 0.6 |
| 60 M | 163.7 | 59.3 | 22.13 | 22.6 | 80   | 127 | 68 | 87.67 | 72 | 6.2  | 6.9 | 4.3 | 1.7 | 0.8 | 34 | 50 | 73  | 295 | 231 | 67  | 66  | 151.6 | 4.7 | 40.5  | 460 | 15.4 | 44.5 | 18.3 | 275 | 16.4 | 0.84 | 143 | 4.3 | 103 | 9    | 5.4 | 112 | 18   | 15.4 | 0.7 | 0.5 |
| 54 F | 157.5 | 58.5 | 23.58 | 33.2 | 77   | 115 | 72 | 86.33 | 71 | 18   | 7.8 | 4.3 | 1.2 | 0.5 | 12 | 9  | 11  | 237 | 184 | 107 | 47  | 115.6 | 5.3 | 49.9  | 476 | 13.8 | 42.3 | 25.7 | 331 | 8.9  | 0.7  | 143 | 3.9 | 103 | 9    | 4.6 | 90  | 14.6 | 17.4 | 0.8 | 1   |
| 59 F | 162.9 | 61.4 | 23.14 | 29.4 | 75   | 108 | 64 | 78.67 | 68 | 15.6 | 6.9 | 4.4 | 1.8 | 0.7 | 24 | 22 | 27  | 338 | 196 | 261 | 62  | 81.8  | 5.3 | 50.4  | 463 | 13.9 | 43.1 | 23.4 | 275 | 9.9  | 0.58 | 144 | 3.7 | 103 | 9.4  | 4.1 | 131 | 11.9 | 13.3 | 0.8 | 1   |
| 55 M | 180.1 | 83.2 | 25.65 | 36.9 | 101  | 138 | 76 | 96.67 | 82 | 9.7  | 7.8 | 4.4 | 1.3 | 1   | 32 | 53 | 101 | 313 | 202 | 353 | 40  | 91.4  | 6.3 | 96.7  | 538 | 16.9 | 49.9 | 29.7 | 292 | 17.4 | 0.82 | 142 | 4.2 | 100 | 9.4  | 7   | 47  | 11.9 | 9.5  | 0.8 | 0.6 |
| 51 F | 150.6 | 59.9 | 26.41 | 34.9 | 79   | 134 | 63 | 86.67 | 91 | 13.6 | 8.6 | 4.4 | 1   | 0.6 | 20 | 20 | 13  | 248 | 170 | 119 | 51  | 95.2  | 5.4 | 56.6  | 468 | 13   | 39.7 | 33.3 | 414 | 11.4 | 0.44 | 143 | 3.9 | 104 | 9.6  | 4   | 85  | 16.6 | 13.5 | 0.7 | 0.5 |
| 67 F | 157.3 | 72   | 29.1  | 39.4 | 97   | 133 | 58 | 83    | 93 | 9    | 7.6 | 4.7 | 1.6 | 0.8 | 19 | 22 | 20  | 232 | 181 | 141 | 42  | 110.8 | 7.4 | 73    | 472 | 14.9 | 43.6 | 26   | 403 | 22.8 | 0.61 | 142 | 4.7 | 104 | 10.1 | 5.7 | 94  | 17.5 | 19.5 | 0.8 | 0.8 |
| 62 M | 158.5 | 58.4 | 23.25 | 26.3 | 82   | 105 | 59 | 74.33 | 60 | 22.2 | 7.6 | 4.4 | 1.4 | 0.7 | 43 | 55 | 59  | 284 | 202 | 118 | 55  | 123.4 | 7.5 | 48.5  | 442 | 15   | 44.3 | 17.2 | 250 | 16.7 | 0.53 | 143 | 3.9 | 104 | 9.3  | 6.2 | 72  | 14.6 | 15.6 | 0.5 | 0.6 |
| 58 F | 155.7 | 44.7 | 18.44 | 22.2 | 62   | 155 | 89 | 111   | 91 | 4.7  | 7.8 | 4.8 | 1.6 | 0.8 | 25 | 29 | 23  | 231 | 237 | 108 | 64  | 151.4 | 5.5 | 48.9  | 422 | 13.8 | 40.9 | 23.6 | 305 | 14.8 | 0.55 | 142 | 4   | 102 | 9.6  | 4.7 | 88  | 10.6 | 12.4 | 0.9 | 1.5 |
| 71 M | 148.9 | 55.4 | 24.99 | 22.8 | 77   | 132 | 69 | 90    | 51 | 23   | 7.5 | 4.3 | 1.3 | 0.8 | 31 | 11 | 29  | 190 | 218 | 83  | 69  | 132.4 | 6   | 49.1  | 460 | 17.2 | 49.7 | 18.8 | 264 | 7.5  | 0.88 | 145 | 4   | 103 | 9.1  | 5   | 84  | 12.7 | 14.7 | 0.9 | 1   |
| 74 F | 151.2 | 43.8 | 19.16 | 20.7 | 60   | 154 | 70 | 98    | 76 | 69   | 7.4 | 4.6 | 1.6 | 0.7 | 31 | 18 | 15  | 148 | 258 | 96  | 108 | 130.8 | 5.3 | 59    | 443 | 13.8 | 41.5 | 20.2 | 301 | 7.4  | 0.71 | 146 | 3.9 | 103 | 9.5  | 3.7 | 91  | 11.8 | 12.3 | 0.8 | 0.6 |
| 82 M | 154.3 | 50.1 | 21.04 | 15.6 | 76   | 156 | 85 | 108.7 | 66 | 97.8 | 6.9 | 4.1 | 1.5 | 0.7 | 22 | 12 | 34  | 261 | 132 | 62  | 49  | 70.6  | 6   | 66.7  | 471 | 14.5 | 43.2 | 20.7 | 368 | 6.9  | 0.78 | 142 | 5.1 | 104 | 9.1  | 4.9 | 61  | 11.9 | 12.2 | 0.7 | 1.5 |
| 78 F | 135.9 | 40.3 | 21.82 | 28.8 | 69   | 116 | 62 | 80    | 66 | 30.3 | 8   | 4.8 | 1.5 | 0.6 | 31 | 16 | 22  | 242 | 163 | 93  | 56  | 88.4  | 4.9 | 62.3  | 461 | 14.9 | 45.6 | 20.6 | 331 | 8    | 0.49 | 147 | 4.2 | 105 | 9.5  | 4.3 | 80  | 14.2 | 14.4 | 0.7 | 1   |
| 58 M | 163.7 | 60.5 | 22.58 | 20.7 | 82   | 100 | 59 | 72.67 | 77 | 9.9  | 7.3 | 4   | 1.2 | 0.3 | 20 | 23 | 75  | 360 | 117 | 157 | 28  | 57.6  | 6.1 | 63.8  | 492 | 15.1 | 44.7 | 26.7 | 283 | 7.3  | 1    | 145 | 3.7 | 107 | 8.8  | 6.7 | 121 | 9.1  | 8    | 0.6 | 0.7 |
| 64 M | 165.6 | 79   | 28.81 | 33.4 | 94   | 143 | 83 | 103   | 61 | 7.8  | 7.3 | 4.2 | 1.4 | 1   | 51 | 70 | 105 | 190 | 158 | 123 | 39  | 94.4  | 5.5 | 54.1  | 459 | 15.3 | 43.6 | 26.2 | 244 | 7.3  | 0.76 | 143 | 4.2 | 102 | 9.1  | 5.8 | 65  | 11.1 | 13.5 | 0.7 | 1   |
| 64 F | 148.1 | 52.6 | 23.98 | 30.5 | 74   | 124 | 77 | 92.67 | 66 | 5.8  | 7.2 | 4.3 | 1.5 | 0.5 | 20 | 14 | 20  | 235 | 232 | 83  | 58  | 157.4 | 5.7 | 38.6  | 410 | 13   | 38.4 | 26.6 | 292 | 7.2  | 0.67 | 144 | 4.9 | 104 | 9.4  | 3.8 | 113 | 9.3  | 11   | 1.6 | 1   |
| 58 F | 141.7 | 53.6 | 26.69 | 32.4 | 75   | 121 | 69 | 86.33 | 92 | 4.1  | 7.6 | 4.9 | 1.8 | 0.6 | 27 | 26 | 36  | 483 | 242 | 108 | 73  | 147.4 | 5.2 | 51.3  | 457 | 14   | 41.4 | 28.6 | 305 | 8    | 0.5  | 144 | 3.7 | 102 | 9.5  | 4.5 | 62  | 14.3 | 14.3 | 0.8 | 0.8 |
| 49 F | 158.4 | 53.5 | 21.32 | 28   | 66   | 152 | 80 | 104   | 76 | 33.9 | 7.8 | 4.2 | 1.2 | 0.9 | 20 | 17 | 15  | 156 | 243 | 77  | 102 | 125.6 | 5.1 | 51.8  | 471 | 14.7 | 43.8 | 25.8 | 305 | 17.1 | 0.83 | 141 | 3.9 | 101 | 9.1  | 4.6 | 76  | 16.3 | 13.2 | 0.8 | 0.7 |
| 69 M | 160.1 | 54.3 | 21.18 | 16.2 | 75.5 | 128 | 68 | 88    | 61 | 2.5  | 7.2 | 4.5 | 1.7 | 0.5 | 26 | 32 | 32  | 295 | 271 | 197 | 72  | 159.6 | 7.8 | 60.8  | 454 | 15.1 | 44.2 | 37.8 | 326 | 13.9 | 0.91 | 139 | 4.7 | 98  | 9.4  | 5   | 86  | 15.7 | 14.1 | 0.9 | 0.6 |
| 65 M | 166.9 | 67.4 | 24.2  | 22.5 | 85   | 126 | 66 | 86    | 51 | 20.9 | 8   | 4.3 | 1.2 | 0.8 | 29 | 22 | 48  | 208 | 168 | 65  | 71  | 84    | 5.4 | 60.6  | 477 | 16.2 | 47   | 24.8 | 368 | 11.7 | 0.68 | 142 | 4.7 | 103 | 8.8  | 6.5 | 60  | 10.6 | 11.4 | 0.8 | 0.9 |
| 70 F | 148.5 | 49.6 | 22.49 | 29.3 | 66   | 102 | 51 | 68    | 84 | 14.8 | 8   | 4.1 | 1.1 | 0.6 | 45 | 37 | 23  | 383 | 152 | 85  | 49  | 86    | 4.9 | 44.3  | 398 | 14.1 | 39.2 | 19.9 | 228 | 17.9 | 0.56 | 144 | 4   | 106 | 9.6  | 5.4 | 115 | 13.4 | 13.8 | 0.9 | 0.7 |
| 72 M | 161.8 | 67.1 | 25.63 | 25.1 | 91   | 157 | 87 | 110.3 | 74 | 7.6  | 7.2 | 4.4 | 1.6 | 0.6 | 26 | 29 | 48  | 273 | 165 | 100 | 42  | 103   | 5.5 | 88.2  | 487 | 15.2 | 45.1 | 31.3 | 326 | 14.4 | 0.92 | 145 | 4.3 | 104 | 9.4  | 5.2 | 79  | 10.8 | 10.6 | 0.9 | 0.9 |
| 66 M | 158.5 | 50.1 | 19.94 | 20.6 | 70.5 | 103 | 60 | 74.33 | 72 | 5.8  | 7.1 | 4.4 | 1.6 | 1.1 | 37 | 29 | 33  | 166 | 222 | 63  | 96  | 113.4 | 5.7 | 53.9  | 482 | 15.4 | 45.7 | 23.6 | 257 | 13.1 | 0.64 | 145 | 4   | 104 | 9    | 4.9 | 89  | 13.3 | 10.1 | 0.7 | 0.7 |
| 67 F | 142.5 | 41.3 | 20.34 | 26   | 64.5 | 130 | 62 | 84.67 | 65 | 21.6 | 6.8 | 4.3 | 1.7 | 0.5 | 36 | 42 | 24  | 243 | 173 | 102 | 69  | 83.6  | 6.6 | 54.7  | 344 | 11.3 | 32.7 | 25.2 | 384 | 12.5 | 0.52 | 145 | 3.6 | 104 | 8.9  | 2.8 | 72  | 12.9 | 10.5 | 1.2 | 1.4 |
| 69 M | 163.3 | 69.3 | 25.99 | 24.9 | 86   | 179 | 87 | 117.7 | 67 | 15.1 | 7.4 | 4.4 | 1.5 | 0.7 | 26 | 21 | 29  | 212 | 234 | 192 | 44  | 151.6 | 4.5 | 79.8  | 477 | 15.2 | 43.8 | 33.1 | 331 | 13.6 | 1.02 | 146 | 4.7 | 104 | 9.1  | 5   | 59  | 9.9  | 11.2 | 1.3 | 1.5 |
| 61 F | 152.5 | 42.8 | 18.4  | 20   | 61   | 129 | 79 | 95.67 | 66 | 46.7 | 7.3 | 3.8 | 1.1 | 1.2 | 27 | 23 | 15  | 247 | 230 | 69  | 130 | 86.2  | 4.8 | 51.9  | 461 | 13.9 | 42   | 25.1 | 315 | 18.9 | 0.57 | 144 | 3.5 | 102 | 8.7  | 4.4 | 135 | 13.1 | 13.1 | 1   | 1.1 |
| 59 F | 155.6 | 70.2 | 28.99 | 41.9 | 80   | 123 | 66 | 85    | 72 | 8.7  | 7.4 | 4.3 | 1.4 | 0.8 | 24 | 22 | 27  | 282 | 211 | 40  | 77  | 126   | 5.2 | 53.9  | 481 | 14.9 | 43.5 | 25.3 | 331 | 16.7 | 0.63 | 142 | 4.1 | 100 | 9.3  | 5.9 | 79  | 17.3 | 17.6 | 0.8 | 0.7 |
| 69 F | 157.7 | 62.9 | 25.29 | 34   | 85   | 120 | 55 | 76.67 | 66 | 10.3 | 8   | 4   | 1   | 0.5 | 19 | 17 | 18  | 222 | 169 | 106 | 36  | 111.8 | 5.3 | 60.1  | 408 | 13   | 38.2 | 33.5 | 550 | 9.3  | 0.69 | 142 | 3.6 | 100 | 9.3  | 5.3 | 67  | 16.1 | 15.1 | 0.9 | 0.9 |
| 67 F | 148.1 | 58   | 26.44 | 40.1 | 91   | 132 | 88 | 102.7 | 82 | 2.2  | 8.1 | 4.7 | 1.4 | 0.8 | 31 | 30 | 34  | 262 | 167 | 228 | 35  | 86.4  | 5   | 72    | 430 | 13.6 | 40.6 | 14.6 | 236 | 16   | 0.69 | 143 | 4   | 103 | 9.3  | 4.9 | 89  | 13.8 | 13.7 | 0.7 | 0.7 |
| 50 F | 160.6 | 55   | 21.32 | 27.9 | 63   | 155 | 92 | 113   | 82 | 12.4 | 7.7 | 4.8 | 1.7 | 0.8 | 17 | 10 | 21  | 195 | 240 | 61  | 98  | 129.8 | 5   | 41.2  | 477 | 14.9 | 44.1 | 21   | 267 | 16.7 | 0.57 | 143 | 4.2 | 102 | 9.5  | 3.9 | 83  | 14.7 | 17.2 | 0.6 | 0.8 |
| 66 M | 171.3 | 75.2 | 25.63 | 27.2 | 99.5 | 128 | 72 | 90.67 | 72 | 4.6  | 8.1 | 4.6 | 1.3 | 0.8 | 29 | 32 | 64  | 187 | 196 | 131 | 50  | 119.8 | 5.2 | 79.8  | 468 | 15.8 | 44.7 | 31.8 | 275 | 15.3 | 0.8  | 143 | 4.1 | 103 | 9.3  | 7.2 | 65  | 13   | 13.3 | 0.8 | 0.8 |
| 67 M | 164.6 | 77.8 | 28.72 | 28.3 | 88   | 136 | 69 | 91.33 | 67 | 30   | 7.7 | 4.6 | 1.5 | 0.8 | 26 | 32 | 56  | 166 | 168 | 358 | 34  | 62.4  | 4.9 | 48.6  | 444 | 15.4 | 42.8 | 19.7 | 260 | 15.1 | 0.93 | 142 | 4.3 | 102 | 10   | 8.9 | 104 | 13.7 | 16.4 | 0.8 | 0.8 |
| 72 F | 145.7 | 47.5 | 22.38 | 35.2 | 69   | 130 | 79 | 96    | 74 | 24.4 | 8.3 | 4.4 | 1.1 | 0.4 | 24 | 15 | 56  | 381 | 196 | 196 | 59  | 97.8  | 5.2 | 67.8  | 379 | 12.5 | 37.4 | 34.4 | 264 | 21.6 | 1.11 | 142 | 4.4 | 103 | 9.8  | 5.7 | 116 | 11.3 | 10.2 | 1.1 | 1   |
| 70 M | 176.1 | 69.1 | 22.28 | 18.1 | 83   | 154 | 71 | 98.67 | 64 | 14.8 | 7.8 | 4   | 1.1 | 1.2 | 16 | 10 | 61  | 311 | 213 | 106 | 53  | 138.8 | 6   | 110.9 | 406 | 13.8 | 41   | 22.3 | 663 | 16.8 | 0.93 | 141 | 4.5 | 101 | 8.9  | 6.1 | 47  | 7.8  | 7.6  | 1   | 1.1 |
| 59 M | 161.3 | 59.9 | 23.02 | 21.2 | 85   | 150 | 90 | 110   | 67 | 5.9  | 7   | 4.3 | 1.6 | 0.9 | 22 | 17 | 28  | 178 | 211 | 105 | 55  | 135   | 5.4 | 64.2  | 489 | 16.4 | 48.1 | 28.3 | 349 | 11.8 | 0.67 | 143 | 4.7 | 103 | 9.7  | 5.3 | 76  | 14.2 | 15.9 | 0.8 | 1.1 |
| 66 F | 159.1 | 59.9 | 23.66 | 34.6 | 75   | 123 | 65 | 84.33 | 68 | 22.8 | 7.3 | 4.3 | 1.4 | 0.6 | 17 | 16 | 13  | 312 | 181 | 119 | 58  | 99.2  | 5.3 | 59    | 440 | 13.7 | 40.9 | 19   | 375 | 13.6 | 0.54 | 143 | 3.9 | 103 | 9.2  | 3.9 | 65  | 13.4 |      |     |     |

|      |       |      |       |      |      |     |     |       |     |      |     |     |     |     |    |    |     |     |     |     |     |       |     |       |     |      |      |      |     |      |      |     |     |     |      |     |     |      |      |     |     |
|------|-------|------|-------|------|------|-----|-----|-------|-----|------|-----|-----|-----|-----|----|----|-----|-----|-----|-----|-----|-------|-----|-------|-----|------|------|------|-----|------|------|-----|-----|-----|------|-----|-----|------|------|-----|-----|
| 64 F | 152.9 | 51.5 | 22.03 | 29.1 | 70   | 135 | 71  | 92.33 | 72  | 5.9  | 8.1 | 4.7 | 1.4 | 0.5 | 25 | 17 | 30  | 218 | 199 | 160 | 58  | 109   | 5.1 | 57.2  | 452 | 14.9 | 43.2 | 20.3 | 279 | 11.5 | 0.56 | 145 | 4.8 | 105 | 9.6  | 3.6 | 74  | 13.8 | 12.5 | 0.7 | 0.8 |
| 62 F | 154   | 46.9 | 19.78 | 23.9 | 60   | 154 | 78  | 103.3 | 107 | 27.1 | 7.2 | 4   | 1.3 | 0.6 | 26 | 17 | 17  | 191 | 196 | 66  | 50  | 132.8 | 5.4 | 111.3 | 390 | 12.6 | 38.7 | 22.7 | 513 | 9.3  | 0.55 | 141 | 3.9 | 100 | 9    | 3.8 | 107 | 13.6 | 12.8 | 0.7 | 0.8 |
| 61 F | 158.9 | 57.5 | 22.77 | 32.6 | 70.5 | 152 | 101 | 118   | 60  | 14.9 | 7.6 | 4.5 | 1.5 | 1   | 28 | 21 | 20  | 312 | 244 | 95  | 64  | 161   | 4.9 | 44.5  | 477 | 13.6 | 43.1 | 27.9 | 461 | 13.1 | 0.6  | 144 | 3.7 | 104 | 9.2  | 4   | 113 | 9    | 11.2 | 0.9 | 0.9 |
| 61 F | 154.7 | 49   | 20.47 | 23.2 | 73   | 141 | 80  | 100.3 | 71  | 18   | 7.8 | 4.7 | 1.5 | 0.6 | 20 | 13 | 23  | 183 | 269 | 155 | 55  | 183   | 5.1 | 44.4  | 393 | 11.6 | 35.4 | 23.6 | 250 | 15.7 | 0.59 | 144 | 4.3 | 105 | 9.7  | 3.5 | 70  | 12.6 | 14.8 | 0.6 | 0.9 |
| 62 F | 142   | 55   | 27.28 | 38.5 | 71   | 149 | 81  | 103.7 | 67  | 11.3 | 6.4 | 4.2 | 1.9 | 0.4 | 20 | 15 | 18  | 207 | 198 | 127 | 47  | 125.6 | 5   | 73.6  | 421 | 14.1 | 42.3 | 19.2 | 283 | 20.6 | 0.58 | 144 | 4   | 109 | 8.7  | 4   | 96  | 17.3 | 11.6 | 0.8 | 0.8 |
| 62 F | 147.7 | 57.6 | 26.4  | 36.2 | 76.5 | 117 | 46  | 69.67 | 71  | 13.9 | 7.9 | 4.7 | 1.5 | 0.6 | 24 | 25 | 47  | 149 | 245 | 126 | 64  | 155.8 | 5.6 | 61.7  | 434 | 13.1 | 40.4 | 20.9 | 331 | 16   | 0.71 | 143 | 4.4 | 103 | 10.2 | 7.8 | 113 | 14.2 | 11.6 | 0.6 | 0.6 |
| 66 M | 172.5 | 77.9 | 26.18 | 28.3 | 95   | 125 | 60  | 81.67 | 58  | 12.7 | 7.1 | 4.6 | 1.8 | 0.9 | 28 | 26 | 87  | 236 | 239 | 160 | 57  | 150   | 5.6 | 51.7  | 521 | 16.3 | 50.9 | 18.6 | 244 | 14   | 0.87 | 144 | 4.2 | 106 | 9    | 7   | 53  | 9.4  | 9.2  | 0.7 | 0.6 |
| 55 M | 164.9 | 68.8 | 25.3  | 23.1 | 83   | 124 | 68  | 86.67 | 65  | 4.6  | 7.3 | 4.7 | 1.8 | 0.8 | 16 | 18 | 56  | 198 | 252 | 104 | 66  | 165.2 | 5.8 | 39.7  | 496 | 16   | 48.5 | 22.1 | 257 | 11.5 | 0.73 | 144 | 4.3 | 105 | 9    | 2.9 | 121 | 15.1 | 13.4 | 0.7 | 0.6 |
| 67 F | 150.5 | 57.9 | 25.56 | 39.8 | 79   | 113 | 59  | 77    | 51  | 33.4 | 7.2 | 4.3 | 1.5 | 0.5 | 17 | 13 | 24  | 167 | 234 | 175 | 60  | 139   | 6.2 | 68.5  | 498 | 14.7 | 43.9 | 30   | 239 | 17   | 0.62 | 143 | 4.5 | 105 | 8.9  | 6   | 100 | 13.3 | 14   | 1   | 0.8 |
| 62 M | 165.5 | 60.8 | 22.2  | 19.8 | 72.5 | 131 | 72  | 91.67 | 59  | 2.2  | 7.9 | 4.6 | 1.4 | 0.6 | 32 | 31 | 34  | 177 | 244 | 283 | 48  | 139.4 | 5.1 | 44.9  | 440 | 14.3 | 42.5 | 20.3 | 375 | 13.5 | 0.61 | 143 | 4   | 102 | 9.4  | 5.2 | 68  | 8.4  | 10.3 | 0.7 | 0.7 |
| 72 F | 151.3 | 45.2 | 19.75 | 24.4 | 70.5 | 133 | 75  | 94.33 | 80  | 50.9 | 6.9 | 4.1 | 1.5 | 0.4 | 23 | 23 | 14  | 386 | 223 | 96  | 77  | 126.8 | 4.9 | 67.2  | 406 | 12.1 | 38.1 | 19.8 | 292 | 18.1 | 0.75 | 142 | 3.9 | 106 | 9    | 3.3 | 147 | 10.6 | 9    | 0.8 | 0.9 |
| 74 F | 152.8 | 55   | 23.56 | 27.6 | 73   | 148 | 81  | 103.3 | 69  | 40.5 | 7.2 | 4.1 | 1.3 | 0.6 | 20 | 14 | 22  | 205 | 225 | 94  | 56  | 150.2 | 5.3 | 76.3  | 482 | 14.5 | 45.3 | 19.7 | 337 | 14.6 | 0.68 | 144 | 4.1 | 106 | 8.7  | 5.3 | 73  | 12.1 | 10.7 | 0.8 | 1.1 |
| 58 M | 155.9 | 50.9 | 20.94 | 20.5 | 76   | 141 | 78  | 99    | 59  | 24   | 7.3 | 4.4 | 1.5 | 1.5 | 20 | 27 | 38  | 265 | 225 | 101 | 63  | 141.8 | 8.8 | 54.1  | 498 | 15.7 | 45.3 | 18.5 | 175 | 15.2 | 0.77 | 142 | 3.4 | 98  | 9.1  | 5   | 45  | 13.2 | 15.9 | 0.8 | 0.7 |
| 69 F | 151.8 | 46.5 | 20.18 | 25.9 | 66   | 113 | 58  | 76.33 | 95  | 23.8 | 7.6 | 4.6 | 1.5 | 1   | 18 | 9  | 23  | 245 | 239 | 68  | 57  | 168.4 | 5.3 | 151.9 | 412 | 12.3 | 38.6 | 19.3 | 483 | 11.3 | 0.69 | 140 | 3.8 | 100 | 9.3  | 3.4 | 51  | 12.4 | 12.9 | 0.8 | 1.2 |
| 58 F | 159.9 | 57.8 | 22.61 | 29.3 | 73   | 120 | 61  | 80.67 | 57  | 5.3  | 8.6 | 4.6 | 1.2 | 0.6 | 17 | 12 | 12  | 229 | 193 | 120 | 45  | 124   | 5.1 | 78.7  | 479 | 13.9 | 42.5 | 21   | 226 | 15.8 | 0.74 | 142 | 3.9 | 103 | 9.7  | 7.3 | 63  | 12.1 | 11.9 | 1   | 1   |
| 63 F | 147.9 | 46.6 | 21.3  | 25.2 | 69.5 | 103 | 72  | 82.33 | 72  | 26.7 | 7.3 | 4.5 | 1.6 | 0.9 | 21 | 4  | 16  | 190 | 195 | 89  | 50  | 127.2 | 5.4 | 46.7  | 462 | 12.7 | 41   | 18.9 | 216 | 11.8 | 0.6  | 143 | 4   | 104 | 9.2  | 4.6 | 58  | 12.8 | 13   | 0.6 | 0.9 |
| 63 F | 154.9 | 49.9 | 20.8  | 26.5 | 69   | 128 | 75  | 92.67 | 59  | 8.5  | 7.6 | 4.9 | 1.8 | 0.7 | 24 | 23 | 24  | 220 | 226 | 109 | 66  | 138.2 | 5.6 | 50.3  | 465 | 13.7 | 43.4 | 18.3 | 260 | 15.1 | 0.59 | 142 | 3.4 | 102 | 9.4  | 5.8 | 104 | 12.7 | 13.7 | 0.6 | 1.1 |
| 69 F | 154.1 | 56.1 | 23.62 | 31.7 | 64.5 | 127 | 64  | 85    | 91  | 28.8 | 7.5 | 4.7 | 1.7 | 0.8 | 19 | 10 | 13  | 182 | 180 | 75  | 66  | 99    | 5.2 | 44.5  | 435 | 13.3 | 41.5 | 25.7 | 283 | 13.4 | 0.56 | 144 | 4.2 | 104 | 9.2  | 4.6 | 91  | 17.1 | 14.7 | 0.7 | 0.8 |
| 61 M | 171.2 | 71.6 | 24.43 | 20.2 | 88   | 137 | 84  | 101.7 | 63  | 17.2 | 8.1 | 4.6 | 1.3 | 0.9 | 42 | 37 | 22  | 224 | 264 | 104 | 69  | 174.2 | 4.9 | 70.6  | 488 | 15.8 | 48.6 | 19.1 | 305 | 16.3 | 0.87 | 142 | 4   | 103 | 9.5  | 6.4 | 192 | 15.8 | 14.4 | 0.9 | 0.8 |
| 62 M | 170.4 | 74.5 | 25.66 | 25.1 | 88   | 130 | 69  | 89.33 | 67  | 3.7  | 7.9 | 4.8 | 1.5 | 0.5 | 29 | 40 | 28  | 265 | 220 | 130 | 40  | 154   | 5.3 | 62.9  | 557 | 15.8 | 48.4 | 15.9 | 305 | 11.4 | 0.76 | 143 | 4   | 101 | 9.3  | 6   | 76  | 13.4 | 13.8 | 0.5 | 0.8 |
| 63 F | 153.4 | 53.2 | 22.61 | 27.2 | 73   | 146 | 92  | 110   | 69  | 6    | 7.4 | 4.7 | 1.7 | 0.6 | 23 | 19 | 22  | 236 | 216 | 117 | 62  | 130.6 | 5.4 | 59.4  | 480 | 14   | 44   | 24   | 271 | 10.9 | 0.49 | 143 | 4.1 | 102 | 9    | 3.2 | 86  | 9.5  | 12.1 | 0.7 | 0.8 |
| 67 M | 155.4 | 60.9 | 25.22 | 21.9 | 85.5 | 109 | 57  | 74.33 | 53  | 6.4  | 7.4 | 4.4 | 1.5 | 0.5 | 17 | 18 | 29  | 169 | 196 | 405 | 36  | 79    | 5.3 | 72.7  | 473 | 15   | 45   | 20.2 | 310 | 16.3 | 0.8  | 144 | 4.4 | 105 | 9    | 7   | 90  | 15.7 | 14.2 | 0.7 | 0.9 |
| 64 M | 155.6 | 59.2 | 24.45 | 26   | 75   | 179 | 100 | 126.3 | 59  | 15.3 | 7.1 | 4.3 | 1.5 | 1.3 | 21 | 17 | 21  | 240 | 168 | 112 | 53  | 92.6  | 5   | 75.7  | 502 | 14.7 | 46.5 | 22.2 | 287 | 12.9 | 0.72 | 141 | 4.5 | 101 | 9    | 6.5 | 90  | 11.9 | 18.6 | 0.8 | 1.1 |
| 67 F | 155.7 | 51   | 21.04 | 28.1 | 71   | 124 | 71  | 88.67 | 68  | 11.1 | 7.6 | 4.6 | 1.5 | 0.7 | 18 | 14 | 18  | 220 | 214 | 73  | 68  | 131.4 | 5.8 | 52.6  | 449 | 13.4 | 41.8 | 24.8 | 301 | 21.1 | 0.6  | 142 | 4   | 102 | 9.9  | 5.4 | 67  | 10.2 | 10.2 | 0.7 | 0.8 |
| 57 F | 153.3 | 44.2 | 18.81 | 24.1 | 58   | 138 | 69  | 92    | 89  | 14.4 | 8.3 | 4.7 | 1.3 | 0.5 | 20 | 21 | 18  | 308 | 197 | 111 | 52  | 122.8 | 5.2 | 51.5  | 498 | 14.2 | 43.6 | 20.2 | 305 | 16.8 | 0.63 | 144 | 3.7 | 105 | 9.4  | 4.6 | 100 | 13.8 | 12.4 | 2.1 | 1.2 |
| 63 M | 169   | 68.5 | 23.98 | 24   | 81.5 | 131 | 76  | 94.33 | 52  | 16   | 7.4 | 4.5 | 1.6 | 0.8 | 19 | 15 | 12  | 173 | 202 | 173 | 43  | 124.4 | 5   | 55.5  | 487 | 13.9 | 42.9 | 23.1 | 301 | 14.1 | 0.87 | 141 | 3.8 | 103 | 9    | 6.1 | 68  | 17.5 | 14.2 | 0.6 | 0.7 |
| 62 F | 155.6 | 53.2 | 21.97 | 26.7 | 67   | 138 | 92  | 107.3 | 60  | 23.9 | 7.1 | 4.5 | 1.7 | 0.8 | 25 | 22 | 29  | 204 | 253 | 104 | 63  | 169.2 | 5.2 | 50.2  | 441 | 13.6 | 42.9 | 24.2 | 337 | 15.4 | 0.71 | 145 | 4   | 105 | 9.1  | 4.5 | 102 | 12.9 | 13.2 | 0.7 | 0.8 |
| 60 M | 168.1 | 54.6 | 19.32 | 17   | 72.5 | 151 | 83  | 105.7 | 77  | 4.6  | 7.7 | 4.3 | 1.3 | 0.7 | 35 | 29 | 123 | 274 | 210 | 592 | 41  | 50.6  | 5   | 57.1  | 468 | 15.5 | 47.1 | 24.9 | 275 | 10.7 | 0.72 | 146 | 3.8 | 104 | 9    | 7.6 | 78  | 15.7 | 14.6 | 0.9 | 0.7 |
| 62 F | 154.6 | 49.5 | 20.71 | 27.3 | 66   | 131 | 71  | 91    | 69  | 9.5  | 7.3 | 4.5 | 1.6 | 0.9 | 14 | 12 | 15  | 228 | 229 | 71  | 69  | 145.8 | 5.3 | 56.8  | 485 | 13.8 | 44.2 | 20.9 | 239 | 16.2 | 0.6  | 145 | 4.4 | 107 | 8.8  | 4.2 | 58  | 12.7 | 13.6 | 0.8 | 0.6 |
| 67 F | 148.2 | 62.8 | 28.59 | 32.7 | 86   | 128 | 64  | 85.33 | 62  | 9.5  | 7   | 4   | 1.3 | 0.6 | 19 | 17 | 11  | 188 | 215 | 114 | 50  | 142.2 | 5.3 | 51.6  | 376 | 13.2 | 38.9 | 16.2 | 384 | 14.2 | 0.61 | 144 | 3.8 | 106 | 8.5  | 5.2 | 60  | 8.3  | 13.4 | 0.5 | 0.7 |
| 71 M | 165.6 | 52.2 | 19.03 | 15.4 | 71   | 114 | 75  | 88    | 79  | 20.5 | 7.4 | 4.3 | 1.4 | 0.8 | 14 | 14 | 26  | 200 | 169 | 83  | 48  | 104.4 | 5.5 | 45.6  | 460 | 14.3 | 42   | 18.1 | 349 | 15.2 | 0.75 | 143 | 4.2 | 105 | 9.1  | 4.7 | 92  | 13.8 | 15.5 | 0.9 | 0.9 |
| 69 F | 154.9 | 46.9 | 19.55 | 21.8 | 65   | 97  | 54  | 68.33 | 66  | 18.1 | 6.9 | 4.3 | 1.7 | 0.6 | 21 | 16 | 17  | 185 | 225 | 70  | 92  | 119   | 5.5 | 49.1  | 431 | 13.8 | 42.3 | 21.4 | 228 | 14.7 | 0.65 | 144 | 4.2 | 108 | 9.7  | 5   | 89  | 7.6  | 7.9  | 0.6 | 0.7 |
| 65 M | 162.6 | 73.1 | 27.65 | 23.9 | 97   | 149 | 89  | 109   | 63  | 3.8  | 7.7 | 4.5 | 1.4 | 1   | 43 | 45 | 39  | 184 | 172 | 158 | 56  | 84.4  | 4.9 | 52.7  | 446 | 14.5 | 43.6 | 17.7 | 264 | 10.5 | 0.81 | 143 | 4.3 | 104 | 9    | 6.1 | 98  | 7.8  | 9.3  | 1.2 | 1.6 |
| 60 M | 173.3 | 71.4 | 23.77 | 22.6 | 85   | 103 | 58  | 73    | 48  | 22.6 | 7.1 | 4.4 | 1.6 | 1.5 | 24 | 19 | 18  | 165 | 205 | 63  | 55  | 137.4 | 5.2 | 37.1  | 504 | 15.9 | 49.1 | 14.9 | 267 | 14.8 | 0.9  | 145 | 4.6 | 108 | 8.8  | 6.2 | 77  | 15.2 | 12.2 | 1.2 | 0.6 |
| 68 M | 162.7 | 52   | 19.64 | 13.7 | 66   | 121 | 64  | 83    | 63  | 16.7 | 7.8 | 5   | 1.8 | 1.4 | 26 | 18 | 26  | 214 | 257 | 76  | 110 | 131.8 | 5.3 | 38.7  | 491 | 15.1 | 46.4 | 17.7 | 212 | 20.5 | 0.77 | 145 | 4.6 | 104 | 9.3  | 4.8 | 108 | 12.7 | 12.6 | 0.6 | 0.7 |
| 48 F | 160.9 | 71.2 | 27.5  | 30.7 | 78.5 | 94  | 52  | 66    | 54  | 43.1 | 7.3 | 4.2 | 1.4 | 0.5 | 15 | 12 | 15  | 122 | 197 | 77  | 50  | 131.6 | 5.4 | 36.5  | 392 | 9.6  | 31.7 | 25.7 | 231 | 14.8 | 0.69 | 144 | 4   | 109 |      |     |     |      |      |     |     |

|    |   |       |      |       |      |      |     |    |       |    |      |     |     |     |     |    |    |     |     |     |     |     |       |     |      |     |      |      |      |     |      |      |     |     |     |     |     |     |      |      |     |     |
|----|---|-------|------|-------|------|------|-----|----|-------|----|------|-----|-----|-----|-----|----|----|-----|-----|-----|-----|-----|-------|-----|------|-----|------|------|------|-----|------|------|-----|-----|-----|-----|-----|-----|------|------|-----|-----|
| 63 | M | 168.1 | 49.6 | 17.55 | 15.1 | 68   | 148 | 72 | 97.33 | 50 | 28.6 | 6.9 | 4.5 | 1.9 | 1   | 36 | 28 | 69  | 186 | 186 | 69  | 102 | 70.2  | 4.7 | 50.3 | 475 | 16.1 | 47   | 20.8 | 219 | 14.8 | 0.62 | 144 | 4.7 | 104 | 9.3 | 6.1 | 51  | 14.7 | 16.1 | 0.8 | 0.7 |
| 65 | F | 152.9 | 52.4 | 22.41 | 29.8 | 77   | 118 | 59 | 78.67 | 63 | 11   | 7   | 4.4 | 1.7 | 0.7 | 16 | 11 | 13  | 215 | 266 | 199 | 58  | 168.2 | 5.8 | 53   | 444 | 13.6 | 40.9 | 20.1 | 315 | 12.9 | 0.7  | 144 | 4.3 | 105 | 9.1 | 4.6 | 76  | 10.2 | 10.5 | 0.9 | 1.1 |
| 65 | F | 143.9 | 51.5 | 24.87 | 27.5 | 72   | 124 | 69 | 87.33 | 58 | 48.7 | 7   | 4.2 | 1.5 | 0.5 | 20 | 14 | 14  | 266 | 182 | 143 | 47  | 106.4 | 5.4 | 54.3 | 429 | 12.7 | 38.8 | 15.6 | 271 | 10.5 | 0.6  | 145 | 3.8 | 106 | 8.8 | 5   | 79  | 16.5 | 14.5 | 1.2 | 0.7 |
| 55 | F | 147.9 | 50.3 | 22.99 | 28.8 | 64.5 | 116 | 63 | 80.67 | 63 | 6.6  | 7.3 | 4.2 | 1.4 | 0.6 | 19 | 15 | 10  | 160 | 166 | 112 | 56  | 87.6  | 5.1 | 54.8 | 393 | 12.6 | 38.3 | 22.8 | 279 | 17.2 | 0.46 | 142 | 4.1 | 103 | 9.3 | 3.8 | 98  | 19.6 | 18   | 0.7 | 0.7 |
| 51 | M | 165.7 | 53.5 | 19.49 | 16.6 | 71.5 | 148 | 80 | 102.7 | 61 | 29.3 | 7.3 | 4.5 | 1.6 | 0.5 | 29 | 30 | 75  | 199 | 161 | 58  | 91  | 58.4  | 5.1 | 60.3 | 454 | 14.1 | 42.6 | 26.5 | 260 | 15.1 | 0.75 | 141 | 4.2 | 102 | 9   | 7.1 | 80  | 12.2 | 12.7 | 0.8 | 0.6 |
| 53 | M | 170.5 | 73.5 | 25.28 | 25.2 | 86   | 115 | 72 | 86.33 | 60 | 4.1  | 7.5 | 4.4 | 1.4 | 0.7 | 20 | 16 | 22  | 158 | 218 | 74  | 71  | 132.2 | 4.4 | 72.8 | 475 | 14.9 | 44.8 | 25.9 | 326 | 11.8 | 1.1  | 143 | 4.4 | 106 | 9.3 | 6.6 | 73  | 10.6 | 11.5 | 0.7 | 0.5 |
| 52 | M | 167.8 | 71.3 | 25.32 | 25.1 | 82   | 129 | 76 | 93.67 | 49 | 9.1  | 7.2 | 4.7 | 1.9 | 1.1 | 25 | 20 | 109 | 230 | 178 | 137 | 62  | 88.6  | 5.7 | 62.6 | 464 | 14.7 | 44.7 | 25.7 | 331 | 19.2 | 1.13 | 143 | 4.3 | 106 | 9.6 | 7.6 | 55  | 11.5 | 13   | 0.7 | 0.5 |
| 53 | M | 150.5 | 40.9 | 18.06 | 14.5 | 63   | 103 | 52 | 69    | 45 | 30.5 | 7.2 | 4.5 | 1.7 | 0.5 | 38 | 35 | 28  | 218 | 193 | 104 | 59  | 113.2 | 5.5 | 73   | 489 | 15.9 | 47.2 | 22.7 | 221 | 21.8 | 0.78 | 145 | 5.3 | 106 | 9.3 | 5.3 | 96  | 11.9 | 10.3 | 0.6 | 0.6 |
| 50 | M | 174.9 | 61.6 | 20.14 | 19.7 | 77   | 136 | 74 | 94.67 | 70 | 2    | 7.5 | 4.9 | 1.9 | 0.7 | 20 | 19 | 27  | 232 | 229 | 66  | 98  | 117.8 | 4.8 | 44.9 | 516 | 16.6 | 50.2 | 26.1 | 315 | 7.2  | 0.84 | 142 | 4.1 | 102 | 9.5 | 4.7 | 88  | 13.9 | 15.5 | 0.8 | 0.8 |
| 58 | M | 167.9 | 61.9 | 21.96 | 24.3 | 83   | 152 | 91 | 111.3 | 77 | 2    | 7.8 | 4.8 | 1.6 | 0.5 | 24 | 25 | 59  | 241 | 252 | 98  | 89  | 143.4 | 5.3 | 59.4 | 482 | 15.3 | 45.4 | 23.8 | 315 | 14.2 | 1.09 | 143 | 4.4 | 104 | 9.6 | 6.9 | 107 | 20.5 | 19.6 | 0.7 | 0.9 |
| 54 | F | 166.1 | 58.4 | 21.17 | 24.4 | 68   | 120 | 64 | 82.67 | 65 | 17.6 | 7.5 | 4.5 | 1.5 | 0.8 | 27 | 27 | 31  | 161 | 181 | 49  | 76  | 95.2  | 4.8 | 34.6 | 422 | 13.4 | 40.2 | 11.4 | 247 | 14.7 | 0.79 | 143 | 3.7 | 104 | 9.7 | 4.5 | 124 | 10.4 | 9.8  | 0.6 | 0.7 |
| 57 | M | 174   | 77   | 25.43 | 24.7 | 86.5 | 167 | 93 | 117.7 | 63 | 21.6 | 7.2 | 4.5 | 1.7 | 1.4 | 32 | 26 | 65  | 150 | 188 | 287 | 44  | 86.6  | 4.6 | 59.5 | 505 | 16   | 48.2 | 18.8 | 283 | 14.9 | 0.88 | 146 | 3.9 | 107 | 9.3 | 6.5 | 44  | 10.2 | 13.9 | 0.5 | 0.8 |
| 68 | M | 172.6 | 73.7 | 24.74 | 19.9 | 90   | 128 | 80 | 96    | 59 | 49.6 | 6.9 | 4.2 | 1.6 | 1   | 30 | 22 | 101 | 282 | 192 | 52  | 70  | 111.6 | 4.3 | 49.6 | 454 | 15   | 43.2 | 22.6 | 242 | 11.7 | 0.84 | 143 | 4.1 | 106 | 8.8 | 5.3 | 73  | 8.6  | 11   | 0.7 | 0.8 |
| 55 | F | 150.4 | 39.1 | 17.29 | 19.3 | 64.8 | 112 | 62 | 78.67 | 88 | 14.4 | 7.5 | 4.5 | 1.5 | 0.5 | 22 | 14 | 15  | 197 | 238 | 45  | 117 | 112   | 4.8 | 47.3 | 458 | 13.9 | 41.4 | 21.3 | 317 | 11.2 | 0.7  | 142 | 4.3 | 104 | 9.6 | 4.1 | 170 | 12.4 | 13.1 | 0.6 | 0.6 |
| 57 | F | 150.5 | 62.6 | 27.64 | 40.3 | 80.5 | 137 | 81 | 99.67 | 62 | 4.3  | 7.4 | 4.5 | 1.6 | 0.9 | 25 | 32 | 20  | 146 | 209 | 78  | 70  | 123.4 | 5.2 | 61.5 | 435 | 13.9 | 41.3 | 18.4 | 328 | 17.1 | 0.61 | 141 | 3.7 | 102 | 9.4 | 9   | 48  | 12.6 | 18.5 | 0.6 | 0.6 |
| 67 | F | 143.9 | 53.9 | 26.03 | 36.3 | 80   | 125 | 64 | 84.33 | 80 | 3.2  | 8.1 | 4.5 | 1.3 | 0.7 | 19 | 19 | 22  | 212 | 193 | 86  | 56  | 119.8 | 6.6 | 65.1 | 446 | 13.6 | 41.7 | 28.4 | 439 | 24.4 | 0.63 | 143 | 4.5 | 107 | 9.5 | 5   | 75  | 10.7 | 12.6 | 0.8 | 0.8 |
| 64 | F | 154.7 | 56.1 | 23.44 | 29.1 | 73.5 | 146 | 81 | 102.7 | 70 | 64.8 | 7.7 | 4.2 | 1.2 | 0.8 | 19 | 13 | 15  | 214 | 186 | 72  | 64  | 107.6 | 5.5 | 47.9 | 420 | 12.8 | 38.8 | 19.9 | 250 | 14.4 | 0.74 | 143 | 3.9 | 106 | 9.1 | 4.4 | 37  | 8.5  | 11.1 | 0.5 | 0.7 |
| 66 | F | 153.7 | 59.4 | 25.14 | 31.8 | 77   | 126 | 69 | 88    | 64 | 8.5  | 7.4 | 4.9 | 2   | 0.8 | 27 | 29 | 28  | 207 | 199 | 137 | 71  | 100.6 | 6.6 | 57.5 | 472 | 14   | 43.1 | 17.4 | 269 | 15.1 | 0.82 | 145 | 4.2 | 106 | 9.4 | 5.7 | 96  | 23.9 | 24.5 | 1.3 | 0.8 |
| 63 | F | 150.5 | 58.4 | 25.78 | 33.6 | 72.5 | 124 | 75 | 91.33 | 74 | 4.2  | 7.4 | 4.4 | 1.5 | 0.7 | 17 | 14 | 17  | 189 | 248 | 76  | 57  | 175.8 | 5.1 | 51.9 | 445 | 13.5 | 40.3 | 22.1 | 360 | 22.5 | 0.68 | 143 | 4   | 106 | 9   | 4.6 | 54  | 13   | 12.6 | 0.8 | 0.7 |
| 65 | M | 168.1 | 65.5 | 23.18 | 21.6 | 80   | 148 | 78 | 101.3 | 56 | 10.8 | 7.2 | 4.5 | 1.7 | 0.4 | 21 | 19 | 30  | 386 | 134 | 92  | 49  | 66.6  | 6.4 | 65.9 | 474 | 14.9 | 44.6 | 22.6 | 353 | 14.2 | 0.93 | 141 | 4.3 | 101 | 9.3 | 5.2 | 66  | 18.1 | 13.9 | 0.8 | 0.7 |
| 46 | F | 157.3 | 62.9 | 25.42 | 34.3 | 80.5 | 109 | 65 | 79.67 | 62 | 5.9  | 7.4 | 4.2 | 1.3 | 0.8 | 14 | 11 | 32  | 169 | 170 | 111 | 80  | 67.8  | 4.8 | 61   | 476 | 14.3 | 43.6 | 8.6  | 254 | 9.3  | 0.67 | 141 | 3.7 | 103 | 9   | 5.1 | 43  | 13   | 12   | 0.5 | 0.5 |
| 80 | M | 163.1 | 73.3 | 27.55 | 23.4 | 101  | 133 | 72 | 92.33 | 74 | 48.2 | 7.5 | 4.4 | 1.4 | 1.1 | 29 | 26 | 44  | 161 | 211 | 160 | 53  | 126   | 4.8 | 55.7 | 449 | 14.3 | 43.3 | 15.6 | 242 | 16.2 | 0.58 | 143 | 4.1 | 102 | 9   | 5.6 | 39  | 9.1  | 9.5  | 0.5 | 1.2 |
| 52 | M | 172.1 | 57.5 | 19.41 | 14.3 | 67.5 | 112 | 75 | 87.33 | 51 | 7    | 7.4 | 4.8 | 1.8 | 1   | 18 | 11 | 35  | 195 | 238 | 62  | 78  | 147.6 | 5   | 41.5 | 482 | 14.9 | 45.4 | 18.5 | 286 | 12.5 | 0.77 | 144 | 4.6 | 103 | 9.9 | 6.1 | 94  | 10.8 | 8.7  | 0.3 | 0.4 |
| 54 | F | 154.4 | 51.1 | 21.44 | 26.4 | 70   | 102 | 55 | 70.67 | 51 | 7.2  | 7.1 | 4.5 | 1.7 | 0.9 | 13 | 12 | 18  | 253 | 261 | 59  | 75  | 174.2 | 5.6 | 49.7 | 441 | 13.4 | 40.1 | 30.7 | 257 | 14.4 | 0.62 | 143 | 3.9 | 106 | 9.4 | 4.1 | 62  | 10   | 8.9  | 0.4 | 0.5 |
| 64 | F | 163.1 | 68.5 | 25.75 | 30.5 | 86   | 128 | 79 | 95.33 | 60 | 32   | 7.2 | 4.3 | 1.5 | 0.6 | 25 | 23 | 17  | 238 | 226 | 110 | 57  | 147   | 5.2 | 50.5 | 395 | 12.1 | 36.2 | 20.8 | 322 | 14.6 | 0.57 | 144 | 3.9 | 106 | 9   | 4.8 | 46  | 11.5 | 10.8 | 0.6 | 0.7 |
| 55 | M | 183.3 | 80   | 23.81 | 24.1 | 87   | 145 | 83 | 103.7 | 71 | 3.5  | 7.6 | 4.7 | 1.6 | 1.1 | 19 | 21 | 30  | 241 | 207 | 206 | 44  | 121.8 | 5.4 | 61.6 | 558 | 16.6 | 47.5 | 22.7 | 273 | 14.4 | 1.01 | 144 | 4   | 105 | 9.3 | 6.8 | 75  | 12   | 10.6 | 0.6 | 0.7 |
| 68 | F | 149.7 | 54.2 | 24.19 | 28.6 | 78.5 | 143 | 83 | 103   | 72 | 13.5 | 7   | 4.3 | 1.6 | 0.8 | 19 | 17 | 17  | 239 | 227 | 72  | 60  | 152.6 | 5.3 | 71.1 | 434 | 12.8 | 38.8 | 19.4 | 239 | 16.7 | 0.63 | 142 | 4.4 | 107 | 9   | 3.8 | 77  | 16   | 16.8 | 0.7 | 0.9 |
| 67 | F | 155.6 | 59.9 | 24.74 | 31.5 | 77   | 149 | 89 | 109   | 56 | 46.9 | 7.3 | 4.6 | 1.7 | 0.6 | 16 | 11 | 15  | 226 | 195 | 125 | 52  | 118   | 5.7 | 64.9 | 443 | 13.3 | 40.5 | 28.9 | 328 | 11.2 | 0.73 | 143 | 4.1 | 104 | 9.6 | 5.1 | 64  | 16.6 | 13   | 0.5 | 0.8 |
| 57 | F | 155.9 | 49.9 | 20.53 | 23.3 | 61   | 183 | 89 | 120.3 | 62 | 91.2 | 7.4 | 4.5 | 1.6 | 0.6 | 17 | 13 | 13  | 174 | 196 | 59  | 63  | 121.2 | 5.2 | 62.1 | 456 | 13.9 | 41.5 | 23.2 | 311 | 13   | 0.7  | 144 | 4.6 | 106 | 9.3 | 4.2 | 66  | 16.6 | 19.3 | 0.7 | 0.9 |
| 54 | M | 166.3 | 62.1 | 22.45 | 20.2 | 79.5 | 133 | 87 | 102.3 | 48 | 25.7 | 7.5 | 4.4 | 1.4 | 1.1 | 27 | 29 | 63  | 225 | 183 | 112 | 47  | 113.6 | 5.3 | 41.7 | 477 | 15.5 | 43.4 | 20.8 | 209 | 12.1 | 0.72 | 140 | 4.4 | 103 | 9.3 | 6.4 | 51  | 9.7  | 12.8 | 0.6 | 0.9 |
| 49 | M | 169.3 | 63   | 21.98 | 17.5 | 71   | 136 | 74 | 94.67 | 45 | 27.3 | 6.8 | 4.5 | 2   | 1.2 | 19 | 16 | 21  | 179 | 179 | 58  | 52  | 115.4 | 5.1 | 75.3 | 436 | 15.6 | 46.9 | 20.5 | 311 | 9.8  | 0.82 | 142 | 4.5 | 105 | 9.4 | 5.9 | 74  | 13.9 | 11.7 | 0.6 | 0.7 |
| 62 | F | 161.3 | 42.7 | 16.41 | 15.5 | 61.5 | 107 | 60 | 75.67 | 57 | 15.1 | 7.4 | 4.4 | 1.5 | 0.8 | 24 | 22 | 41  | 228 | 226 | 90  | 71  | 137   | 6.3 | 54.5 | 469 | 14.1 | 42.6 | 23.3 | 301 | 12.4 | 0.51 | 141 | 4.7 | 103 | 9.6 | 4.9 | 80  | 13.4 | 12.5 | 0.8 | 0.9 |
| 56 | F | 151.3 | 54.7 | 23.9  | 27.9 | 79   | 119 | 78 | 91.67 | 70 | 11.4 | 7.5 | 4.6 | 1.6 | 1.1 | 19 | 17 | 15  | 250 | 200 | 55  | 64  | 125   | 4.6 | 40.8 | 416 | 13   | 38.5 | 21.6 | 301 | 17.9 | 0.67 | 143 | 4.1 | 103 | 9.3 | 3.8 | 46  | 12.1 | 13   | 0.7 | 0.6 |
| 66 | M | 166.9 | 52.6 | 18.88 | 16.6 | 72.5 | 113 | 55 | 74.33 | 55 | 12   | 6.3 | 4.2 | 2   | 1.1 | 25 | 16 | 64  | 262 | 201 | 98  | 78  | 103.4 | 4.8 | 47.1 | 438 | 14.7 | 44.3 | 25.2 | 286 | 13.1 | 0.65 | 141 | 4.7 | 105 | 8.9 | 5.4 | 53  | 7.3  | 8.1  | 0.6 | 0.6 |
| 61 | F | 149.4 | 44.8 | 20.07 | 25.8 | 66   | 132 | 78 | 96    | 92 | 4.5  | 7.6 | 4.6 | 1.5 | 1.1 | 28 | 26 | 29  | 231 | 206 | 80  | 48  | 142   | 5.1 | 41.1 | 485 | 14.3 | 43.1 | 19.3 | 317 | 11.2 | 0.63 | 143 | 3.6 | 104 | 9.4 | 4.7 | 63  | 13.8 | 14.6 | 0.6 | 0.6 |
| 57 | M | 171.7 | 67.9 | 23.03 | 24.1 | 83   | 159 | 87 | 111   | 80 | 12.9 |     |     |     |     |    |    |     |     |     |     |     |       |     |      |     |      |      |      |     |      |      |     |     |     |     |     |     |      |      |     |     |

|    |   |       |      |       |      |      |     |    |       |    |      |     |     |     |     |    |    |     |     |     |     |    |       |     |       |     |      |      |      |     |      |      |     |     |     |     |     |     |      |      |     |     |
|----|---|-------|------|-------|------|------|-----|----|-------|----|------|-----|-----|-----|-----|----|----|-----|-----|-----|-----|----|-------|-----|-------|-----|------|------|------|-----|------|------|-----|-----|-----|-----|-----|-----|------|------|-----|-----|
| 55 | M | 163.3 | 66.8 | 25.05 | 24.3 | 85   | 120 | 71 | 87.33 | 69 | 3.2  | 7.6 | 4.5 | 1.5 | 0.7 | 30 | 25 | 276 | 303 | 190 | 77  | 64 | 110.6 | 5.1 | 49.4  | 469 | 14.8 | 44.9 | 21.9 | 317 | 13   | 0.73 | 143 | 5   | 106 | 9.2 | 6.2 | 48  | 8.8  | 9.7  | 0.6 | 0.6 |
| 61 | M | 168.2 | 56.8 | 20.08 | 18.9 | 79.5 | 129 | 73 | 91.67 | 67 | 28.3 | 7.1 | 4.6 | 1.8 | 0.7 | 17 | 11 | 27  | 216 | 184 | 70  | 64 | 106   | 8.7 | 74.5  | 459 | 15   | 43.9 | 26.4 | 296 | 21.2 | 0.75 | 142 | 4.8 | 102 | 9.4 | 5   | 58  | 9.6  | 11.5 | 0.6 | 0.7 |
| 51 | M | 165.3 | 63.8 | 23.35 | 21.5 | 78   | 113 | 64 | 80.33 | 63 | 2.7  | 7.4 | 4.8 | 1.8 | 1.1 | 20 | 24 | 30  | 206 | 229 | 181 | 53 | 139.8 | 5.3 | 100.5 | 524 | 16.1 | 45.9 | 19.5 | 328 | 12.8 | 0.79 | 143 | 4   | 106 | 9.5 | 5.4 | 52  | 11.9 | 9.9  | 0.8 | 0.7 |
| 72 | F | 159.4 | 49.2 | 19.36 | 19.1 | 66   | 141 | 80 | 100.3 | 61 | 25   | 7   | 4.2 | 1.5 | 0.8 | 32 | 18 | 14  | 220 | 207 | 65  | 81 | 113   | 5.2 | 43.8  | 398 | 14.2 | 39.2 | 15.3 | 334 | 27.6 | 0.83 | 144 | 5.2 | 106 | 9.5 | 6.6 | 79  | 9.9  | 9.9  | 0.8 | 0.8 |
| 65 | F | 154.9 | 52.4 | 21.84 | 25.1 | 83   | 133 | 67 | 89    | 69 | 13.7 | 6.9 | 4.1 | 1.5 | 1.2 | 19 | 37 | 25  | 94  | 206 | 130 | 72 | 108   | 5.3 | 69.7  | 416 | 13.1 | 38.7 | 26.4 | 306 | 19.6 | 0.77 | 144 | 4.5 | 105 | 9.2 | 3.3 | 162 | 12.9 | 12   | 1.1 | 0.9 |
| 59 | M | 156.5 | 57.4 | 23.44 | 25.7 | 86   | 118 | 72 | 87.33 | 38 | 5.5  | 7.4 | 4.6 | 1.6 | 0.6 | 29 | 35 | 59  | 373 | 170 | 87  | 56 | 96.6  | 6.3 | 48.3  | 494 | 14.5 | 43.9 | 22.9 | 296 | 16.2 | 0.75 | 144 | 4.4 | 107 | 9.4 | 6.9 | 67  | 8.3  | 9.1  | 0.7 | 0.9 |
| 62 | F | 154.2 | 53   | 22.29 | 26   | 75.5 | 114 | 66 | 82    | 69 | 34.5 | 7.2 | 4.4 | 1.6 | 1.1 | 30 | 27 | 17  | 244 | 179 | 96  | 49 | 110.8 | 4.6 | 49.9  | 452 | 13.8 | 40.1 | 7.3  | 224 | 11.1 | 0.7  | 144 | 3.9 | 108 | 9   | 5.7 | 56  | 19.1 | 16.2 | 0.7 | 0.8 |
| 65 | M | 157.1 | 58.6 | 23.74 | 24.3 | 86   | 126 | 65 | 85.33 | 61 | 11.2 | 7.2 | 4.4 | 1.6 | 1.1 | 25 | 18 | 91  | 180 | 165 | 112 | 59 | 83.6  | 5.2 | 56.8  | 390 | 12.2 | 36.5 | 19.5 | 340 | 25.7 | 0.9  | 140 | 4.5 | 108 | 9.3 | 6.6 | 77  | 8.6  | 10.2 | 1   | 2.1 |
| 62 | M | 164.4 | 66.3 | 24.53 | 21.1 | 84.5 | 151 | 70 | 97    | 54 | 20.6 | 8.2 | 4.9 | 1.5 | 0.7 | 27 | 35 | 30  | 125 | 211 | 181 | 41 | 133.8 | 5.6 | 42    | 456 | 14.8 | 44.2 | 17.8 | 233 | 16.3 | 0.71 | 145 | 3.8 | 105 | 9.7 | 6.2 | 67  | 14.5 | 15.4 | 0.5 | 0.6 |
| 69 | M | 175.5 | 68.1 | 22.11 | 17.4 | 84   | 157 | 89 | 111.7 | 80 | 31.8 | 7.1 | 4   | 1.3 | 0.8 | 22 | 14 | 51  | 175 | 285 | 383 | 49 | 159.4 | 8.4 | 48.5  | 465 | 14.7 | 43.3 | 12.5 | 286 | 14.5 | 0.86 | 141 | 4.6 | 104 | 9   | 5.7 | 112 | 9.4  | 11.4 | 0.7 | 0.6 |
| 50 | M | 163.5 | 69.6 | 26.04 | 25.2 | 87   | 120 | 63 | 82    | 54 | 6.7  | 7.4 | 4.2 | 1.3 | 0.8 | 37 | 43 | 259 | 164 | 215 | 219 | 48 | 123.2 | 5.2 | 74.6  | 504 | 16.7 | 49.6 | 16.5 | 360 | 12.6 | 0.93 | 143 | 3.9 | 107 | 9.7 | 7.8 | 95  | 8    | 8.6  | 0.6 | 0.6 |
| 66 | F | 141   | 49.9 | 25.1  | 30.9 | 76   | 102 | 60 | 74    | 71 | 30.4 | 7.4 | 4.5 | 1.6 | 1   | 20 | 9  | 17  | 168 | 211 | 109 | 71 | 118.2 | 5.5 | 54.9  | 370 | 11.3 | 34   | 23.4 | 317 | 14.6 | 0.75 | 146 | 4.8 | 110 | 8.7 | 5.4 | 105 | 12   | 10.5 | 0.5 | 0.6 |
| 66 | F | 142.5 | 43.4 | 21.37 | 37.2 | 76   | 175 | 72 | 106.3 | 92 | 23.3 | 8.3 | 4.6 | 1.2 | 0.5 | 22 | 16 | 31  | 238 | 220 | 99  | 61 | 139.2 | 5.3 | 90.4  | 417 | 12.8 | 39   | 29.4 | 233 | 13.8 | 0.67 | 146 | 4.7 | 111 | 9.5 | 5.7 | 105 | 16.5 | 15.4 | 0.7 | 0.6 |
| 68 | M | 167   | 75.6 | 27.11 | 19.9 | 87   | 129 | 61 | 83.67 | 47 | 55.8 | 7.1 | 4.4 | 1.6 | 1.6 | 21 | 12 | 36  | 260 | 158 | 143 | 41 | 88.4  | 5.1 | 62.2  | 512 | 16   | 46   | 20.5 | 277 | 13.9 | 1.26 | 144 | 4.4 | 108 | 9.4 | 7.8 | 97  | 14.6 | 15.1 | 0.7 | 0.6 |
| 65 | M | 162.2 | 55.6 | 21.13 | 19.9 | 79   | 141 | 88 | 105.7 | 58 | 27.1 | 7   | 4.5 | 1.8 | 1.3 | 22 | 16 | 16  | 212 | 240 | 97  | 68 | 152.6 | 5.4 | 50.6  | 514 | 15.6 | 47.8 | 15.3 | 247 | 13.8 | 0.87 | 146 | 4   | 104 | 9.6 | 5.9 | 91  | 12.1 | 11.9 | 0.6 | 0.7 |
| 64 | F | 151.3 | 45.5 | 19.88 | 20.8 | 63   | 109 | 65 | 79.67 | 56 | 31.8 | 7.3 | 4   | 1.2 | 0.8 | 23 | 17 | 32  | 238 | 150 | 34  | 58 | 85.2  | 5.4 | 40.4  | 397 | 11.7 | 35.9 | 13.6 | 282 | 12.3 | 0.54 | 143 | 4.1 | 104 | 9.1 | 4.2 | 55  | 11.3 | 12   | 0.5 | 0.6 |
| 52 | M | 177.3 | 89.4 | 28.44 | 27.2 | 95   | 112 | 64 | 80    | 62 | 13.2 | 7.4 | 4.3 | 1.4 | 0.8 | 37 | 48 | 32  | 297 | 173 | 98  | 57 | 96.4  | 5.4 | 63.1  | 531 | 16.4 | 49.9 | 15.8 | 171 | 13.6 | 0.81 | 144 | 4   | 106 | 9.3 | 7.3 | 53  | 9.7  | 10.7 | 0.7 | 0.6 |
| 50 | M | 160.3 | 62.9 | 24.48 | 21.1 | 77.5 | 119 | 76 | 90.33 | 54 | 23.3 | 7   | 4.3 | 1.6 | 0.5 | 17 | 14 | 39  | 185 | 159 | 56  | 55 | 92.8  | 5.1 | 51.1  | 469 | 13.8 | 41.9 | 26.1 | 306 | 15.1 | 0.85 | 145 | 3.8 | 105 | 9   | 5.8 | 121 | 9.5  | 14.7 | 0.8 | 0.8 |
| 55 | M | 167.3 | 69.6 | 24.87 | 24.8 | 87   | 122 | 74 | 90    | 68 | 17.8 | 7   | 4.3 | 1.6 | 0.9 | 27 | 56 | 33  | 161 | 184 | 206 | 36 | 106.8 | 5.6 | 61.8  | 481 | 14.9 | 44.7 | 17   | 241 | 13.9 | 0.93 | 144 | 4   | 107 | 9.5 | 6.3 | 81  | 14.5 | 13.5 | 0.6 | 0.6 |
| 54 | M | 166.5 | 90.4 | 32.61 | 36.7 | 107  | 117 | 60 | 79    | 83 | 4.3  | 7.8 | 4.6 | 1.4 | 0.8 | 32 | 49 | 105 | 223 | 205 | 212 | 50 | 112.6 | 5.9 | 55.2  | 472 | 15.3 | 46.4 | 16.2 | 228 | 12.5 | 0.66 | 141 | 3.9 | 105 | 9.2 | 6.8 | 67  | 16.3 | 19.5 | 0.6 | 0.7 |
| 68 | F | 151.3 | 46.6 | 20.36 | 19.1 | 68   | 108 | 60 | 76    | 65 | 11.8 | 6.4 | 3.9 | 1.5 | 0.5 | 27 | 17 | 12  | 176 | 175 | 70  | 74 | 87    | 4.3 | 28.2  | 372 | 12.4 | 37.9 | 17.5 | 273 | 14.9 | 0.6  | 144 | 4   | 108 | 8.7 | 4.1 | 76  | 13.5 | 12.9 | 0.7 | 0.7 |
| 65 | F | 148.9 | 48.2 | 21.74 | 25.4 | 80   | 129 | 57 | 81    | 58 | 74.1 | 7.5 | 4.7 | 1.6 | 2.1 | 24 | 20 | 46  | 198 | 187 | 87  | 74 | 95.6  | 5.2 | 65.9  | 384 | 12.3 | 37.7 | 23.9 | 233 | 13.8 | 0.58 | 142 | 3.9 | 104 | 9.6 | 5.2 | 39  | 14.6 | 13.3 | 0.7 | 0.7 |
| 68 | F | 146.1 | 47.5 | 22.25 | 26.9 | 74   | 123 | 62 | 82.33 | 69 | 33.7 | 7.3 | 4.4 | 1.5 | 0.9 | 21 | 15 | 32  | 196 | 222 | 130 | 57 | 139   | 5.8 | 66.7  | 425 | 12.9 | 40.8 | 23   | 340 | 15.1 | 0.61 | 144 | 4   | 104 | 9.9 | 5.8 | 71  | 10   | 10.2 | 1   | 0.9 |
| 51 | M | 171.3 | 60.6 | 20.65 | 14.7 | 73.5 | 151 | 89 | 109.7 | 47 | 11.7 | 6.7 | 4.4 | 1.9 | 1   | 15 | 10 | 39  | 196 | 193 | 141 | 73 | 91.8  | 4.6 | 48.9  | 433 | 14.3 | 43.7 | 20.2 | 265 | 12.9 | 0.87 | 142 | 4.6 | 108 | 9   | 5.5 | 48  | 16   | 15.2 | 0.6 | 0.6 |
| 51 | F | 156.1 | 45.8 | 18.8  | 21.7 | 66.5 | 111 | 76 | 87.67 | 55 | 22.4 | 7.7 | 4.5 | 1.4 | 0.9 | 14 | 11 | 14  | 221 | 162 | 51  | 68 | 83.8  | 5   | 37.9  | 396 | 11.7 | 37.1 | 11.5 | 221 | 9.4  | 0.66 | 142 | 4.4 | 108 | 9.1 | 2.8 | 82  | 11.2 | 13.5 | 0.5 | 0.6 |
| 47 | M | 167.3 | 66.8 | 23.87 | 24   | 85   | 145 | 85 | 105   | 61 | 7.3  | 7.4 | 4.6 | 1.6 | 0.5 | 42 | 36 | 311 | 154 | 214 | 196 | 50 | 124.8 | 5.1 | 77.5  | 473 | 15.4 | 46.1 | 20.8 | 250 | 10.8 | 0.67 | 143 | 4.3 | 105 | 9.7 | 8.3 | 45  | 12.5 | 14.5 | 0.5 | 0.5 |
| 48 | F | 155.6 | 51.9 | 21.44 | 29.6 | 71   | 105 | 50 | 68.33 | 63 | 17.4 | 8   | 4.4 | 1.2 | 0.6 | 15 | 14 | 18  | 152 | 204 | 145 | 45 | 130   | 5.3 | 81.3  | 414 | 10.9 | 34.8 | 39.9 | 286 | 9.6  | 0.63 | 141 | 4.7 | 107 | 9.4 | 3.6 | 60  | 10.5 | 9.2  | 0.6 | 0.6 |
| 63 | F | 152.2 | 53.2 | 22.97 | 26.6 | 79   | 120 | 61 | 80.67 | 60 | 23.4 | 7.3 | 4.2 | 1.4 | 0.8 | 18 | 17 | 21  | 239 | 231 | 165 | 48 | 150   | 5.8 | 64    | 426 | 12.9 | 40.5 | 30.1 | 347 | 11.8 | 0.65 | 144 | 4.1 | 107 | 9.3 | 3.9 | 75  | 13.2 | 13.8 | 0.6 | 0.5 |
| 66 | M | 166.4 | 55.3 | 19.97 | 16.3 | 68   | 126 | 71 | 89.33 | 51 | 10.8 | 7   | 4.4 | 1.7 | 0.5 | 22 | 14 | 47  | 268 | 207 | 88  | 57 | 132.4 | 4.7 | 45.1  | 428 | 13.6 | 40.7 | 21.7 | 322 | 15.7 | 0.77 | 141 | 4.4 | 102 | 9.3 | 5.3 | 88  | 7.9  | 8.3  | 0.7 | 1.2 |
| 65 | F | 154.2 | 45.7 | 19.22 | 20.9 | 69   | 109 | 54 | 72.33 | 59 | 34.4 | 7.3 | 4.4 | 1.5 | 0.4 | 28 | 13 | 18  | 143 | 216 | 73  | 74 | 127.4 | 5.2 | 49.8  | 437 | 13.1 | 39.4 | 22.1 | 239 | 15.8 | 0.64 | 144 | 4.5 | 108 | 9.4 | 4.7 | 70  | 11.2 | 15.7 | 0.6 | 0.7 |
| 64 | M | 154.6 | 57.5 | 24.06 | 24.5 | 78   | 156 | 56 | 89.33 | 56 | 15.2 | 7.1 | 4.6 | 1.8 | 0.5 | 21 | 20 | 30  | 175 | 200 | 88  | 46 | 136.4 | 6.3 | 60.3  | 407 | 13   | 39.6 | 18.1 | 273 | 20   | 0.86 | 144 | 4.1 | 106 | 9.1 | 5.2 | 71  | 11.9 | 13   | 2.1 | 1.6 |
| 63 | M | 161.3 | 69   | 26.52 | 22.7 | 88   | 156 | 78 | 104   | 54 | 30.1 | 7.4 | 4.4 | 1.5 | 0.7 | 20 | 13 | 56  | 86  | 199 | 172 | 57 | 107.6 | 5.3 | 65.1  | 468 | 13.9 | 42.1 | 19.3 | 347 | 16.7 | 0.79 | 145 | 3.9 | 110 | 9.1 | 7   | 62  | 17   | 16.8 | 0.5 | 0.7 |
| 66 | M | 171   | 64.5 | 22.06 | 17.7 | 79   | 120 | 54 | 76    | 43 | 23.9 | 7.1 | 4.2 | 1.4 | 0.9 | 30 | 28 | 26  | 137 | 201 | 108 | 90 | 89.4  | 6.5 | 61.7  | 447 | 14.7 | 45   | 22.1 | 212 | 13   | 0.73 | 140 | 4.8 | 104 | 8.7 | 5.1 | 137 | 14.4 | 14.4 | 0.8 | 1.1 |
| 62 | F | 162.5 | 56.9 | 21.55 | 27.5 | 71   | 131 | 81 | 97.67 | 59 | 14.8 | 7.9 | 4.5 | 1.3 | 0.8 | 22 | 15 | 15  | 316 | 287 | 47  | 93 | 184.6 | 5.5 | 54.1  | 456 | 13.4 | 42.3 | 21   | 347 | 12.8 | 0.63 | 142 | 3.8 | 103 | 9.5 | 4.1 | 90  | 15.7 | 15.3 | 0.7 | 0.8 |
| 67 | M | 168.9 | 63.1 | 22.12 | 22   | 84   | 117 | 58 | 77.67 | 49 | 9.7  | 6.8 | 4.1 | 1.5 | 0.8 | 21 | 15 | 20  | 168 | 178 | 63  | 57 | 108.4 | 5.2 | 60.1  | 508 | 13.7 | 43.1 | 22.5 | 226 | 14.4 | 0.85 | 144 | 4   | 109 | 8.6 | 5.6 | 125 | 7.6  | 7.4  | 0.6 | 0.9 |
| 68 | F | 157.5 | 52.2 | 21.04 | 23.7 | 73   | 135 | 85 | 101.7 | 78 | 34.1 | 7.5 | 4.3 | 1.3 | 1.1 | 18 | 12 |     |     |     |     |    |       |     |       |     |      |      |      |     |      |      |     |     |     |     |     |     |      |      |     |     |

|      |       |      |       |      |      |     |    |       |    |      |     |     |     |     |    |    |     |     |     |     |    |       |     |       |     |      |      |      |     |      |      |     |     |     |      |     |     |      |      |     |     |
|------|-------|------|-------|------|------|-----|----|-------|----|------|-----|-----|-----|-----|----|----|-----|-----|-----|-----|----|-------|-----|-------|-----|------|------|------|-----|------|------|-----|-----|-----|------|-----|-----|------|------|-----|-----|
| 66 F | 156.9 | 66.5 | 27.01 | 34.1 | 90   | 155 | 81 | 105.7 | 75 | 11   | 7.4 | 4.2 | 1.3 | 1.2 | 20 | 14 | 15  | 251 | 191 | 70  | 48 | 129   | 5.3 | 68.6  | 459 | 13.7 | 41.9 | 23   | 437 | 15.9 | 0.64 | 143 | 3.9 | 105 | 9.5  | 6.1 | 86  | 12.3 | 10.7 | 1.2 | 1.2 |
| 57 M | 159.3 | 55.5 | 21.87 | 26.7 | 81.5 | 115 | 62 | 79.67 | 67 | 8.8  | 7.1 | 4.4 | 1.6 | 1   | 33 | 52 | 48  | 219 | 219 | 135 | 55 | 137   | 6.3 | 116.2 | 467 | 15.3 | 45.4 | 25.4 | 269 | 13.6 | 0.76 | 140 | 4.3 | 105 | 9    | 4.6 | 71  | 14.3 | 15.2 | 0.6 | 0.8 |
| 63 F | 143.2 | 47.7 | 23.26 | 30.4 | 73   | 122 | 61 | 81.33 | 86 | 12.2 | 7.6 | 4.4 | 1.4 | 0.6 | 29 | 31 | 24  | 255 | 204 | 48  | 63 | 131.4 | 5.5 | 60    | 436 | 13   | 39.4 | 29.2 | 296 | 15.1 | 0.65 | 141 | 4.1 | 105 | 9.3  | 4.4 | 47  | 10.3 | 9.1  | 0.8 | 0.9 |
| 60 F | 147.3 | 45.1 | 20.79 | 22.7 | 60   | 106 | 50 | 68.67 | 54 | 23.6 | 7.2 | 4.3 | 1.5 | 0.8 | 27 | 17 | 20  | 205 | 249 | 42  | 87 | 153.6 | 5   | 50.7  | 474 | 14.8 | 44.5 | 25.9 | 226 | 18.8 | 0.61 | 142 | 4   | 106 | 9.6  | 4.2 | 58  | 13.1 | 11.9 | 0.7 | 0.7 |
| 68 F | 154.9 | 48.7 | 20.23 | 24.6 | 70   | 110 | 56 | 74    | 55 | 14.8 | 7.2 | 4.3 | 1.5 | 1.6 | 18 | 16 | 38  | 140 | 257 | 106 | 77 | 158.8 | 5.3 | 56.8  | 406 | 12.9 | 39.9 | 23.1 | 254 | 12.9 | 0.55 | 143 | 3.9 | 103 | 9.2  | 4.1 | 75  | 14.9 | 19.4 | 0.7 | 0.8 |
| 55 F | 155.5 | 68.3 | 28.25 | 36.9 | 85   | 119 | 74 | 89    | 71 | 25.1 | 7   | 4.5 | 1.8 | 0.5 | 19 | 33 | 27  | 180 | 231 | 120 | 63 | 144   | 5.3 | 60.2  | 479 | 13.2 | 40.6 | 32.8 | 257 | 10.1 | 0.59 | 143 | 4.2 | 107 | 9.5  | 5.7 | 97  | 10.6 | 12.7 | 0.6 | 0.6 |
| 52 F | 159.3 | 51.1 | 20.14 | 24.3 | 68   | 120 | 70 | 86.67 | 53 | 17.8 | 7.9 | 4.8 | 1.5 | 1.6 | 24 | 15 | 19  | 154 | 270 | 71  | 93 | 162.8 | 5.4 | 26.6  | 408 | 12.7 | 38.5 | 19.1 | 277 | 12.1 | 0.68 | 142 | 3.9 | 103 | 9.7  | 4.6 | 108 | 14.4 | 12   | 0.5 | 0.7 |
| 57 M | 163.4 | 69.4 | 25.99 | 28.2 | 86.5 | 148 | 89 | 108.7 | 69 | 4    | 8.1 | 5.1 | 1.7 | 0.9 | 28 | 37 | 21  | 282 | 240 | 151 | 49 | 160.8 | 5.3 | 42.9  | 518 | 15.2 | 46.4 | 22.2 | 221 | 19.8 | 0.83 | 143 | 4.5 | 104 | 9.6  | 5.7 | 76  | 12   | 9.8  | 0.6 | 0.8 |
| 65 F | 142.8 | 51.4 | 25.21 | 36.5 | 75   | 154 | 79 | 104   | 71 | 7.9  | 8   | 4.3 | 1.2 | 0.6 | 37 | 66 | 46  | 244 | 229 | 102 | 59 | 149.6 | 5.5 | 45.3  | 477 | 14.2 | 43.1 | 19.1 | 301 | 18.6 | 0.6  | 144 | 4.5 | 107 | 9    | 5.2 | 94  | 15.2 | 14.6 | 0.5 | 0.7 |
| 58 M | 160.5 | 71.6 | 27.79 | 31.8 | 86.5 | 130 | 79 | 96    | 78 | 32.7 | 7.8 | 4.1 | 1.1 | 0.8 | 26 | 27 | 60  | 255 | 172 | 126 | 47 | 99.8  | 5.4 | 66.6  | 472 | 15.2 | 45.9 | 16.1 | 273 | 11.7 | 0.91 | 142 | 4.2 | 105 | 9    | 7.2 | 133 | 14   | 13.6 | 0.5 | 0.7 |
| 57 F | 158.1 | 51.4 | 20.56 | 24   | 71   | 100 | 48 | 65.33 | 62 | 9.9  | 7.4 | 4.5 | 1.6 | 0.8 | 21 | 16 | 27  | 236 | 217 | 87  | 90 | 109.6 | 5.2 | 46.3  | 417 | 12.5 | 39.2 | 29.3 | 265 | 16.7 | 0.66 | 144 | 4   | 103 | 9.4  | 4.7 | 64  | 7.9  | 8.5  | 0.6 | 0.5 |
| 66 M | 162.6 | 49.7 | 18.8  | 16.4 | 73.5 | 122 | 59 | 80    | 52 | 7.5  | 7.3 | 4.5 | 1.6 | 1   | 24 | 17 | 28  | 211 | 221 | 99  | 63 | 138.2 | 5.1 | 53.9  | 456 | 14.1 | 43.7 | 21.6 | 265 | 8.8  | 0.78 | 145 | 4.6 | 105 | 9.5  | 6.5 | 76  | 11.9 | 14.6 | 1.1 | 1.1 |
| 57 M | 166.1 | 74.3 | 26.93 | 30.1 | 91   | 118 | 81 | 93.33 | 59 | 11.7 | 7.6 | 4.5 | 1.5 | 0.5 | 58 | 79 | 107 | 191 | 161 | 195 | 33 | 89    | 5.5 | 62.9  | 496 | 15.6 | 47   | 27.9 | 317 | 12   | 0.74 | 144 | 4.2 | 106 | 9.7  | 6.4 | 71  | 12.8 | 13.6 | 0.6 | 0.8 |
| 59 M | 167.2 | 64.5 | 23.07 | 21.3 | 80.5 | 128 | 66 | 86.67 | 65 | 9.2  | 7.6 | 4.6 | 1.5 | 1   | 23 | 32 | 27  | 273 | 207 | 139 | 51 | 128.2 | 5.2 | 73.2  | 540 | 16.1 | 48.1 | 20.2 | 334 | 9.8  | 0.79 | 141 | 4.3 | 103 | 9.6  | 5.3 | 87  | 9.8  | 10.3 | 0.7 | 0.8 |
| 54 M | 166.5 | 84.6 | 30.52 | 29.1 | 93   | 127 | 67 | 87    | 71 | 36.3 | 7   | 4.4 | 1.7 | 0.8 | 32 | 55 | 105 | 146 | 173 | 83  | 55 | 101.4 | 6.8 | 66.9  | 490 | 15.8 | 46.9 | 15.2 | 265 | 28.7 | 0.76 | 142 | 4.1 | 104 | 9.2  | 5.9 | 91  | 17.3 | 17.1 | 0.8 | 0.8 |
| 58 M | 169.2 | 85   | 29.69 | 31.6 | 97   | 120 | 66 | 84    | 70 | 11   | 6.8 | 4.3 | 1.7 | 0.7 | 31 | 50 | 72  | 182 | 187 | 156 | 66 | 89.8  | 5.7 | 59.6  | 547 | 15.7 | 48.2 | 18.8 | 291 | 14.2 | 0.93 | 143 | 4   | 104 | 8.8  | 7.3 | 58  | 13.6 | 14.4 | 0.6 | 0.7 |
| 69 M | 161   | 57.2 | 22.07 | 22.6 | 83.5 | 107 | 56 | 73    | 66 | 8.2  | 7.2 | 4.1 | 1.3 | 0.4 | 22 | 19 | 26  | 197 | 204 | 143 | 62 | 113.4 | 5.2 | 66.7  | 462 | 13.8 | 42.4 | 24.8 | 301 | 11.4 | 0.66 | 141 | 4.3 | 102 | 9    | 5   | 73  | 18.2 | 17   | 0.8 | 0.9 |
| 69 F | 148   | 50.1 | 22.87 | 28.2 | 81   | 123 | 61 | 81.67 | 80 | 8    | 7.4 | 4.6 | 1.6 | 0.5 | 20 | 23 | 51  | 317 | 187 | 96  | 58 | 109.8 | 5.6 | 35    | 433 | 13   | 40.3 | 19.5 | 219 | 12.2 | 0.58 | 143 | 4.4 | 104 | 9.2  | 6.2 | 70  | 17   | 17.1 | 0.7 | 0.8 |
| 52 F | 153.9 | 63.1 | 26.64 | 21   | 70   | 98  | 53 | 68    | 71 | 4.9  | 6.6 | 3.9 | 1.4 | 1   | 14 | 10 | 13  | 132 | 192 | 88  | 65 | 109.4 | 5.3 | 65.8  | 458 | 13.4 | 41.3 | 25   | 286 | 10.1 | 0.62 | 139 | 3.9 | 105 | 8.7  | 4.8 | 54  | 9.4  | 13.4 | 0.8 | 0.8 |
| 69 M | 159.5 | 49   | 19.26 | 15.9 | 64   | 127 | 81 | 96.33 | 72 | 8.9  | 7.4 | 4.5 | 1.6 | 1.1 | 22 | 15 | 13  | 319 | 235 | 65  | 65 | 157   | 5.4 | 83.7  | 483 | 14.4 | 44.4 | 17.4 | 311 | 17.6 | 0.75 | 143 | 4.1 | 103 | 9.4  | 4.3 | 76  | 10.9 | 9.7  | 1.1 | 0.9 |
| 51 F | 154.2 | 57.3 | 24.1  | 34.6 | 88   | 117 | 71 | 86.33 | 66 | 4.1  | 7.2 | 4.4 | 1.6 | 0.6 | 18 | 14 | 15  | 201 | 153 | 63  | 57 | 83.4  | 4.9 | 47.6  | 432 | 12.1 | 38.3 | 29.6 | 241 | 9.6  | 0.46 | 141 | 3.9 | 104 | 9    | 4.5 | 76  | 17.6 | 17.2 | 0.7 | 0.7 |
| 60 M | 172   | 76.3 | 25.79 | 25.8 | 87   | 137 | 80 | 99    | 57 | 8.7  | 7.3 | 4.5 | 1.6 | 0.7 | 22 | 17 | 41  | 157 | 175 | 175 | 66 | 74    | 5   | 52.4  | 532 | 16.9 | 50.3 | 22.9 | 291 | 16.6 | 0.8  | 143 | 4.4 | 105 | 10.3 | 6.1 | 60  | 8.8  | 8.6  | 0.8 | 0.9 |
| 54 F | 151   | 49.1 | 21.53 | 28.6 | 69   | 100 | 70 | 80    | 54 | 19.6 | 7.9 | 4.5 | 1.3 | 0.6 | 34 | 23 | 53  | 209 | 263 | 59  | 98 | 153.2 | 5.3 | 52.4  | 459 | 12.4 | 39   | 35.2 | 398 | 17.9 | 0.66 | 142 | 4.5 | 103 | 9.8  | 5.2 | 119 | 11.4 | 12.6 | 0.6 | 0.7 |
| 57 M | 173.5 | 83.4 | 27.71 | 24.6 | 91   | 115 | 68 | 83.67 | 54 | 4.3  | 7.2 | 4.6 | 1.8 | 1   | 22 | 24 | 56  | 297 | 222 | 127 | 70 | 126.6 | 4.9 | 53.5  | 476 | 14.3 | 43.8 | 19.7 | 198 | 11.9 | 0.77 | 144 | 4   | 108 | 9.4  | 5.4 | 46  | 7.8  | 7.6  | 0.7 | 0.7 |
| 52 F | 162.5 | 43.7 | 16.55 | 14.6 | 60   | 120 | 60 | 80    | 78 | 22.5 | 7.4 | 4.6 | 1.6 | 1.3 | 24 | 21 | 21  | 189 | 195 | 40  | 88 | 99    | 5.1 | 37.4  | 437 | 13.4 | 41.2 | 11.3 | 219 | 12.3 | 0.6  | 144 | 4.3 | 106 | 9.5  | 3.1 | 72  | 14.3 | 14.3 | 0.5 | 0.7 |
| 65 M | 158.9 | 44.8 | 17.74 | 13.4 | 62   | 92  | 53 | 66    | 60 | 18.9 | 6.9 | 4.3 | 1.7 | 0.6 | 26 | 15 | 19  | 266 | 227 | 76  | 68 | 143.8 | 5.2 | 99.5  | 477 | 14.3 | 43.5 | 15.1 | 328 | 19.5 | 0.68 | 143 | 4.3 | 104 | 9.4  | 4.2 | 94  | 15   | 11   | 0.7 | 0.7 |
| 68 M | 159.6 | 57.3 | 22.5  | 24.3 | 86   | 127 | 82 | 97    | 80 | 2    | 7.5 | 4.5 | 1.5 | 0.9 | 26 | 25 | 42  | 465 | 210 | 135 | 71 | 112   | 5.1 | 39.9  | 496 | 15.2 | 47.3 | 20   | 375 | 17.1 | 0.81 | 142 | 4.4 | 102 | 9.8  | 3.2 | 91  | 13.1 | 13.1 | 0.7 | 1.6 |
| 67 F | 146.1 | 39.2 | 18.36 | 21.8 | 60   | 117 | 63 | 81    | 66 | 4.1  | 7.5 | 4.5 | 1.5 | 0.8 | 24 | 12 | 10  | 226 | 220 | 68  | 91 | 115.4 | 5.7 | 37.8  | 418 | 13.1 | 39.9 | 23   | 334 | 18.5 | 0.76 | 144 | 5.2 | 104 | 9.7  | 5.2 | 127 | 14.6 | 15.4 | 0.5 | 0.9 |
| 69 M | 162.1 | 51   | 19.41 | 14.3 | 73.5 | 107 | 57 | 73.67 | 59 | 21   | 6.9 | 4.3 | 1.7 | 0.3 | 15 | 10 | 12  | 214 | 219 | 106 | 63 | 134.8 | 5.5 | 66.5  | 426 | 11.6 | 36.1 | 37.1 | 368 | 13.4 | 0.75 | 142 | 4.1 | 103 | 9.3  | 4   | 92  | 8    | 8.6  | 0.6 | 0.8 |
| 57 M | 163.9 | 63.1 | 23.49 | 22.6 | 87   | 132 | 80 | 97.33 | 62 | 3.5  | 6.9 | 4.5 | 1.9 | 0.6 | 16 | 19 | 131 | 219 | 222 | 79  | 61 | 145.2 | 5.2 | 51.4  | 450 | 15   | 44.6 | 20.3 | 286 | 13.5 | 0.77 | 144 | 4.2 | 106 | 9.1  | 5.3 | 98  | 14.2 | 13.1 | 0.7 | 1.1 |
| 51 M | 170.4 | 81.6 | 28.1  | 35.2 | 89   | 144 | 75 | 98    | 72 | 4.8  | 8.1 | 4.5 | 1.3 | 1   | 36 | 47 | 20  | 206 | 165 | 76  | 42 | 107.8 | 5.4 | 66.4  | 536 | 16.4 | 49.5 | 26.3 | 269 | 12   | 0.81 | 140 | 4.3 | 102 | 9.8  | 7   | 109 | 8    | 9.9  | 0.7 | 0.8 |
| 63 M | 170.5 | 64.3 | 22.12 | 18.4 | 78   | 141 | 71 | 94.33 | 61 | 5.2  | 7.5 | 4.4 | 1.4 | 1.1 | 30 | 23 | 24  | 151 | 212 | 107 | 71 | 119.6 | 5.2 | 62.2  | 482 | 16.4 | 49   | 18.2 | 286 | 15.8 | 0.8  | 141 | 4.4 | 103 | 9.1  | 5.5 | 101 | 22.5 | 19.4 | 0.8 | 0.8 |
| 59 F | 156.8 | 51.1 | 20.78 | 23.9 | 67.5 | 115 | 70 | 85    | 79 | 16.4 | 8   | 4.7 | 1.4 | 1.2 | 21 | 25 | 23  | 232 | 236 | 90  | 56 | 162   | 6   | 66.7  | 525 | 15.6 | 46.7 | 21.7 | 291 | 16.5 | 0.7  | 141 | 4.3 | 101 | 9.7  | 4.5 | 116 | 17.2 | 16.9 | 0.8 | 0.8 |
| 69 M | 147.7 | 61.8 | 28.33 | 28.2 | 87.5 | 108 | 69 | 82    | 75 | 11.7 | 7.3 | 4.2 | 1.4 | 0.8 | 22 | 26 | 26  | 186 | 194 | 87  | 50 | 126.6 | 5.7 | 51.1  | 464 | 14.5 | 44.3 | 19.2 | 286 | 14.4 | 0.92 | 143 | 4.7 | 105 | 9.8  | 7.3 | 77  | 9.2  | 11   | 0.9 | 0.8 |
| 64 M | 169.5 | 53.8 | 18.73 | 14.3 | 72.5 | 112 | 64 | 80    | 49 | 15.8 | 7.3 | 4.6 | 1.7 | 0.6 | 38 | 21 | 15  | 203 | 191 | 63  | 75 | 103.4 | 5   | 41.4  | 482 | 15.5 | 46   | 16.5 | 328 | 20.2 | 0.96 | 144 | 4.2 | 104 | 9.3  | 4.9 | 123 | 14.9 | 11   | 0.9 | 0.8 |
| 66 F | 148.2 | 43.2 | 19.67 | 26   | 72   | 152 | 83 | 106   | 67 | 18.1 | 7.4 | 4.4 | 1.5 | 0.5 | 26 | 17 | 16  | 234 | 208 | 156 | 72 | 104.8 | 5.4 | 54.9  | 405 | 13   | 40.1 | 17.1 | 340 | 15.2 | 0.55 | 142 | 3.8 | 101 |      |     |     |      |      |     |     |

|      |       |      |       |      |      |     |    |       |    |      |     |     |     |     |    |    |     |     |     |     |     |       |     |      |     |      |      |      |     |      |      |     |     |     |     |     |     |      |      |       |     |
|------|-------|------|-------|------|------|-----|----|-------|----|------|-----|-----|-----|-----|----|----|-----|-----|-----|-----|-----|-------|-----|------|-----|------|------|------|-----|------|------|-----|-----|-----|-----|-----|-----|------|------|-------|-----|
| 50 M | 165.7 | 55.5 | 20.21 | 17.7 | 71.5 | 108 | 68 | 81.33 | 49 | 24.1 | 7.3 | 4.5 | 1.6 | 0.8 | 16 | 12 | 45  | 199 | 206 | 89  | 82  | 106.2 | 5.4 | 64.3 | 465 | 15.6 | 44.3 | 20   | 269 | 11.2 | 0.75 | 145 | 4   | 104 | 9.4 | 7.2 | 49  | 11   | 14.2 | 0.7   | 0.5 |
| 65 F | 146.1 | 55.6 | 26.05 | 42.9 | 86.5 | 138 | 65 | 89.33 | 54 | 28.2 | 8.1 | 4.7 | 1.4 | 0.8 | 33 | 43 | 24  | 307 | 160 | 49  | 49  | 101.2 | 5.3 | 68.1 | 447 | 13.4 | 41.2 | 27.6 | 328 | 11.8 | 0.56 | 144 | 4   | 102 | 9.8 | 4.9 | 86  | 13.3 | 14.4 | 0.8   | 0.9 |
| 62 M | 162.5 | 59.7 | 22.61 | 21   | 78   | 146 | 76 | 99.33 | 85 | 6.2  | 8.1 | 4.3 | 1.1 | 0.6 | 40 | 52 | 129 | 230 | 209 | 245 | 52  | 108   | 10  | 102  | 462 | 15.2 | 43.7 | 27   | 296 | 20.6 | 0.96 | 143 | 3.5 | 101 | 9.4 | 5.4 | 46  | 16.7 | 17.9 | 0.5   | 0.8 |
| 65 F | 141.9 | 46.3 | 22.99 | 33.6 | 71   | 154 | 77 | 102.7 | 63 | 15   | 8.2 | 4.4 | 1.2 | 0.6 | 23 | 23 | 35  | 248 | 225 | 113 | 76  | 126.4 | 5.7 | 62.5 | 488 | 13.4 | 41.3 | 21   | 340 | 14.7 | 0.68 | 142 | 3.7 | 102 | 9.2 | 5.7 | 87  | 12.9 | 10.6 | 0.8   | 0.7 |
| 64 F | 156.2 | 52.7 | 21.6  | 27.8 | 72   | 115 | 52 | 73    | 76 | 16.2 | 7.4 | 4.5 | 1.6 | 0.7 | 22 | 13 | 15  | 245 | 248 | 105 | 60  | 167   | 5.3 | 58.7 | 415 | 12.4 | 39.1 | 18.3 | 411 | 11   | 0.63 | 143 | 3.9 | 102 | 9.3 | 4.4 | 69  | 14.8 | 13   | 0.5   | 0.8 |
| 59 F | 153.2 | 54   | 23.01 | 26.9 | 74   | 118 | 59 | 78.67 | 56 | 35.2 | 7.1 | 4   | 1.3 | 0.6 | 31 | 23 | 27  | 187 | 173 | 182 | 42  | 94.6  | 5.5 | 65.9 | 467 | 13   | 40.7 | 28.1 | 216 | 8.8  | 0.7  | 144 | 4   | 108 | 9.1 | 4.5 | 87  | 10.6 | 12.8 | 0.7   | 0.8 |
| 61 M | 161.3 | 57.5 | 22.1  | 23.2 | 80.5 | 130 | 60 | 83.33 | 68 | 154  | 7.5 | 4.5 | 1.5 | 0.9 | 41 | 34 | 83  | 168 | 211 | 129 | 42  | 143.2 | 5.5 | 59   | 464 | 15   | 45.5 | 23.3 | 360 | 9.9  | 0.64 | 142 | 4.1 | 103 | 9.4 | 5   | 73  | 13.1 | 10.6 | 0.5   | 0.5 |
| 65 M | 162   | 57.6 | 21.95 | 18.4 | 73   | 142 | 64 | 90    | 66 | 82.9 | 7.4 | 3.9 | 1.1 | 0.3 | 39 | 19 | 47  | 286 | 132 | 87  | 82  | 32.6  | 4.7 | 62.6 | 375 | 11.9 | 35.2 | 29   | 429 | 14.9 | 0.82 | 137 | 4.6 | 98  | 8.4 | 6.1 | 126 | 12.8 | 16.3 | 0.7   | 0.8 |
| 65 F | 149.7 | 44.3 | 19.77 | 27.6 | 76   | 133 | 74 | 93.67 | 73 | 15.1 | 7.6 | 4.4 | 1.4 | 0.6 | 22 | 15 | 19  | 233 | 258 | 107 | 89  | 147.6 | 5.2 | 43.5 | 445 | 14.1 | 40.8 | 18.5 | 257 | 11.3 | 0.64 | 143 | 4.2 | 104 | 9.3 | 5.1 | 79  | 9.3  | 9    | 0.8   | 0.9 |
| 66 M | 162.5 | 49   | 18.56 | 15   | 68   | 128 | 77 | 94    | 61 | 19.1 | 7.4 | 4.4 | 1.5 | 1.1 | 28 | 21 | 109 | 254 | 219 | 55  | 99  | 109   | 5.2 | 64.9 | 488 | 16.2 | 46.6 | 17.8 | 282 | 16.6 | 0.81 | 145 | 4.6 | 106 | 9.2 | 6   | 68  | 15.6 | 12.7 | 1.214 | 0.7 |
| 64 M | 168.1 | 66.5 | 23.53 | 25.1 | 83   | 109 | 76 | 87    | 69 | 55.8 | 6.9 | 4.5 | 1.9 | 1.3 | 21 | 30 | 29  | 272 | 213 | 145 | 56  | 128   | 5.2 | 73.8 | 510 | 15.8 | 47.6 | 17.4 | 254 | 11.7 | 0.64 | 143 | 4.2 | 104 | 9.2 | 5.4 | 77  | 15.3 | 15.5 | 0.7   | 1.3 |
| 69 M | 164   | 59.9 | 22.27 | 18.9 | 77.5 | 115 | 65 | 81.67 | 49 | 39.5 | 6.4 | 3.9 | 1.6 | 1.4 | 27 | 20 | 67  | 287 | 171 | 104 | 76  | 74.2  | 4.9 | 47   | 416 | 14.8 | 42.1 | 24.2 | 244 | 14.7 | 0.86 | 143 | 4.1 | 104 | 8.9 | 5.4 | 117 | 10.4 | 9.4  | 0.8   | 0.8 |
| 67 F | 141.7 | 39.3 | 19.57 | 27   | 66   | 130 | 58 | 82    | 66 | 97.6 | 7.6 | 4.2 | 1.2 | 0.9 | 30 | 28 | 72  | 228 | 206 | 63  | 66  | 127.4 | 5.7 | 60.5 | 448 | 13.6 | 41.2 | 27.2 | 433 | 10.4 | 0.61 | 142 | 4.5 | 100 | 9.5 | 4.7 | 72  | 11.3 | 13.3 | 0.8   | 1.8 |
| 59 M | 166.8 | 55.5 | 19.95 | 18.7 | 78   | 146 | 85 | 105.3 | 66 | 40.6 | 7   | 4.2 | 1.5 | 0.5 | 18 | 14 | 30  | 175 | 185 | 65  | 62  | 120   | 5.3 | 64   | 469 | 15.4 | 47.1 | 22.5 | 368 | 10.4 | 0.82 | 144 | 4.1 | 104 | 9.1 | 6.2 | 56  | 12.9 | 12.3 | 0.5   | 0.7 |
| 59 M | 154.1 | 55.7 | 23.46 | 21   | 80   | 115 | 67 | 83    | 64 | 12   | 7.4 | 4.2 | 1.3 | 0.3 | 23 | 18 | 14  | 278 | 150 | 95  | 41  | 90    | 6   | 48.8 | 466 | 13.4 | 40.4 | 36.8 | 442 | 12.6 | 0.69 | 144 | 4.3 | 102 | 9.4 | 5.3 | 48  | 12   | 10.3 | 0.7   | 1.1 |
| 59 F | 151.3 | 55.7 | 24.33 | 27.7 | 78   | 120 | 63 | 82    | 61 | 26.8 | 7   | 4.4 | 1.7 | 1.1 | 18 | 14 | 25  | 294 | 282 | 82  | 118 | 147.6 | 5.1 | 75.2 | 443 | 13.7 | 42.2 | 22.4 | 311 | 21.1 | 0.64 | 144 | 4.3 | 104 | 9.4 | 4.5 | 201 | 12.9 | 13.3 | 0.7   | 0.7 |
| 68 F | 149.6 | 47.6 | 21.27 | 27.7 | 79.5 | 122 | 68 | 86    | 74 | 28.8 | 7.1 | 4.4 | 1.6 | 0.8 | 25 | 23 | 25  | 246 | 192 | 59  | 68  | 112.2 | 5.1 | 33.9 | 404 | 13.8 | 40.9 | 13.4 | 411 | 18.5 | 0.63 | 144 | 4.3 | 105 | 9.4 | 4.5 | 96  | 12.5 | 12   | 0.7   | 0.8 |
| 68 F | 142.6 | 33.5 | 16.47 | 15.1 | 69   | 138 | 62 | 87.33 | 65 | 42.5 | 7.7 | 4.6 | 1.5 | 0.6 | 28 | 17 | 28  | 266 | 223 | 84  | 78  | 128.2 | 5.1 | 33.3 | 421 | 13.5 | 41   | 16.1 | 244 | 10.1 | 0.57 | 146 | 3.7 | 105 | 9.1 | 3.2 | 74  | 10.8 | 11.2 | 0.7   | 0.8 |
| 66 F | 151.3 | 65.5 | 28.61 | 40   | 83   | 131 | 67 | 88.33 | 70 | 13.8 | 7.4 | 4.4 | 1.5 | 0.9 | 23 | 16 | 30  | 320 | 228 | 209 | 52  | 134.2 | 5.6 | 56.1 | 402 | 12.3 | 37.3 | 32.6 | 340 | 13.1 | 0.53 | 145 | 3.8 | 104 | 8.9 | 4.1 | 86  | 11.3 | 9.8  | 0.7   | 0.7 |
| 67 F | 147.7 | 43.5 | 19.94 | 25.5 | 79.5 | 150 | 75 | 100   | 70 | 33.4 | 7.8 | 4.3 | 1.2 | 0.6 | 29 | 19 | 28  | 301 | 239 | 93  | 68  | 152.4 | 5.7 | 72.7 | 459 | 13.9 | 43.1 | 39.4 | 375 | 7.4  | 0.6  | 142 | 4.2 | 102 | 9.6 | 3.6 | 137 | 15.8 | 15.5 | 0.5   | 2   |
| 65 F | 147   | 46.5 | 21.52 | 22.5 | 72   | 128 | 68 | 88    | 63 | 15.6 | 7.9 | 4.8 | 1.5 | 0.8 | 30 | 23 | 15  | 358 | 219 | 91  | 72  | 128.8 | 5.4 | 52.6 | 434 | 14.5 | 43.9 | 20.2 | 328 | 15.4 | 0.6  | 144 | 4.7 | 103 | 9.9 | 4.5 | 76  | 13.5 | 12.1 | 0.8   | 1.5 |
| 67 M | 153.7 | 45.7 | 19.34 | 11.9 | 65   | 122 | 67 | 85.33 | 51 | 59.8 | 6.7 | 4.2 | 1.7 | 0.5 | 22 | 14 | 20  | 217 | 195 | 92  | 73  | 103.6 | 5   | 38.7 | 421 | 12.8 | 39.9 | 24.7 | 223 | 13   | 0.89 | 142 | 4.5 | 105 | 8.8 | 4.8 | 124 | 12.3 | 12.6 | 1.2   | 0.7 |
| 64 F | 145   | 54.7 | 26.02 | 35.2 | 91   | 144 | 78 | 100   | 77 | 3.7  | 7.7 | 4.6 | 1.5 | 0.5 | 21 | 25 | 121 | 348 | 220 | 81  | 89  | 114.8 | 5.3 | 69.1 | 436 | 14.3 | 43.4 | 20.8 | 291 | 15.6 | 0.79 | 142 | 4.4 | 103 | 9.7 | 4.2 | 106 | 14.3 | 15.9 | 0.7   | 0.7 |
| 66 F | 155.2 | 52.9 | 21.96 | 28.2 | 85   | 101 | 54 | 69.67 | 72 | 5.7  | 7.2 | 4.4 | 1.6 | 0.9 | 26 | 24 | 20  | 262 | 221 | 147 | 67  | 124.6 | 5.2 | 54.7 | 456 | 13.5 | 40.8 | 29.2 | 250 | 20.9 | 0.65 | 143 | 4.5 | 104 | 9.6 | 4.9 | 131 | 14.1 | 13.2 | 0.8   | 0.8 |
| 68 M | 164.7 | 62.6 | 23.08 | 24.1 | 81.5 | 138 | 86 | 103.3 | 87 | 9    | 7.7 | 4.4 | 1.3 | 0.8 | 29 | 32 | 63  | 196 | 218 | 124 | 82  | 111.2 | 5.4 | 80   | 510 | 15.6 | 47.2 | 26   | 291 | 14.2 | 0.79 | 143 | 5.1 | 102 | 9.5 | 7.2 | 95  | 16.3 | 13.7 | 0.7   | 0.8 |
| 64 F | 152.9 | 58   | 24.81 | 30.4 | 84   | 135 | 71 | 92.33 | 66 | 16.9 | 6.9 | 4.5 | 1.9 | 0.6 | 21 | 29 | 33  | 216 | 204 | 138 | 52  | 124.4 | 5.4 | 67.7 | 428 | 13.1 | 39.7 | 22.3 | 296 | 18.6 | 0.6  | 143 | 4.1 | 105 | 9.4 | 5.5 | 69  | 11.3 | 12.9 | 0.7   | 0.8 |
| 67 M | 166.4 | 63   | 22.75 | 23.2 | 81   | 156 | 72 | 100   | 58 | 6.6  | 7.2 | 4.3 | 1.5 | 0.6 | 26 | 17 | 36  | 254 | 196 | 100 | 65  | 111   | 5.7 | 64.3 | 514 | 15.2 | 47.4 | 18.7 | 269 | 19.8 | 0.89 | 141 | 4.4 | 104 | 9.1 | 6   | 101 | 13.3 | 15.3 | 1.2   | 3.3 |
| 68 M | 167.2 | 54.2 | 19.39 | 19.3 | 73   | 134 | 82 | 99.33 | 58 | 51.4 | 7.2 | 3.9 | 1.2 | 0.6 | 23 | 11 | 63  | 176 | 173 | 106 | 51  | 100.8 | 5.3 | 70.4 | 398 | 12.8 | 39.4 | 26.5 | 334 | 12.7 | 0.82 | 143 | 4.6 | 105 | 9.1 | 7.4 | 73  | 12.2 | 10.8 | 0.5   | 0.7 |
| 66 F | 152.9 | 55.9 | 23.91 | 33.2 | 91.5 | 149 | 91 | 110.3 | 67 | 14.4 | 7.2 | 4.3 | 1.5 | 0.8 | 31 | 28 | 19  | 224 | 195 | 107 | 71  | 102.6 | 5   | 61.9 | 430 | 14.1 | 42.3 | 28.6 | 317 | 10.4 | 0.66 | 144 | 4.5 | 105 | 9.4 | 3.7 | 73  | 14.6 | 16.8 | 0.7   | 0.9 |
| 55 M | 174.5 | 81.6 | 26.8  | 26   | 84   | 130 | 74 | 92.67 | 58 | 63.4 | 7.6 | 4.3 | 1.3 | 1.6 | 33 | 23 | 32  | 136 | 158 | 133 | 54  | 97.4  | 5.1 | 63.3 | 485 | 15.5 | 46.1 | 18.6 | 250 | 16.1 | 0.97 | 142 | 4   | 101 | 9.4 | 6.6 | 98  | 13.3 | 13.7 | 0.7   | 0.7 |
| 54 F | 147.8 | 38.5 | 17.62 | 19.9 | 57   | 103 | 52 | 69    | 76 | 9.5  | 6.9 | 4.1 | 1.5 | 0.4 | 24 | 17 | 32  | 140 | 227 | 39  | 105 | 114.2 | 5   | 45.2 | 370 | 9.6  | 32.4 | 49.9 | 375 | 10.2 | 0.69 | 140 | 3.3 | 98  | 9.4 | 5.9 | 78  | 7.9  | 7.9  | 0.5   | 0.5 |
| 57 M | 159.1 | 50.5 | 19.95 | 18.3 | 76   | 146 | 90 | 108.7 | 64 | 28.9 | 7.3 | 4.4 | 1.5 | 0.5 | 26 | 20 | 36  | 243 | 194 | 78  | 70  | 108.4 | 4.8 | 70   | 428 | 14.8 | 45.4 | 24.5 | 340 | 15.9 | 0.98 | 142 | 4.2 | 103 | 9.5 | 7.9 | 108 | 14.3 | 14.1 | 0.5   | 0.7 |
| 69 M | 170.9 | 72   | 24.65 | 21.1 | 87   | 126 | 78 | 94    | 70 | 22.4 | 7.1 | 4.2 | 1.4 | 0.7 | 22 | 17 | 21  | 203 | 195 | 84  | 51  | 127.2 | 5   | 44.3 | 473 | 14.7 | 45.2 | 20   | 257 | 15.5 | 0.68 | 141 | 4.1 | 102 | 8.6 | 2.8 | 56  | 11.9 | 12.9 | 0.7   | 0.7 |
| 59 F | 146.5 | 40.7 | 18.96 | 25.7 | 61   | 174 | 98 | 123.3 | 60 | 87.4 | 7.4 | 4.5 | 1.6 | 0.8 | 30 | 17 | 70  | 212 | 233 | 85  | 84  | 132   | 5.1 | 33.7 | 424 | 13.1 | 40.7 | 20.5 | 241 | 13.8 | 0.52 | 143 | 3.8 | 104 | 9.3 | 3.8 | 82  | 13   | 11.5 | 0.7   | 0.7 |
| 65 F | 147.2 | 39.7 | 18.32 | 20.7 | 62   | 158 | 77 | 104   | 82 | 19.6 | 7.3 | 4.4 | 1.5 | 0.7 | 26 | 20 | 15  | 306 | 219 | 114 | 76  | 120.2 | 4.9 | 65.2 | 568 | 15.4 | 48.7 | 23.6 | 247 | 12.2 | 0.48 | 144 | 4.4 | 104 | 9.1 | 3.3 | 69  | 12.9 | 12.3 | 0.8   | 0.9 |
| 63 M | 163   | 60.8 | 22.88 | 22   | 79   | 120 | 61 | 80.67 | 83 | 5.5  | 7.4 | 4.5 | 1.6 | 0.8 | 39 | 79 | 120 | 286 | 254 | 171 | 66  | 153.8 | 5.3 | 66.5 | 485 | 16.1 | 48.4 | 19.5 | 261 | 22.6 | 0.74 |     |     |     |     |     |     |      |      |       |     |

|      |       |      |       |      |      |     |    |       |    |      |     |     |     |     |     |     |     |     |     |     |    |       |     |      |     |      |      |      |     |      |      |     |     |     |     |     |     |      |      |     |     |
|------|-------|------|-------|------|------|-----|----|-------|----|------|-----|-----|-----|-----|-----|-----|-----|-----|-----|-----|----|-------|-----|------|-----|------|------|------|-----|------|------|-----|-----|-----|-----|-----|-----|------|------|-----|-----|
| 63 F | 153.4 | 45.2 | 19.21 | 22.9 | 61   | 101 | 61 | 74.33 | 65 | 12   | 7.4 | 4.5 | 1.6 | 0.6 | 18  | 10  | 16  | 177 | 199 | 44  | 46 | 144.2 | 5.4 | 31.4 | 327 | 10.6 | 32.8 | 22.9 | 494 | 19.2 | 0.73 | 141 | 4.1 | 103 | 9.7 | 2.1 | 119 | 11.7 | 8.9  | 0.5 | 0.8 |
| 52 M | 170.9 | 75.3 | 25.78 | 23.3 | 81.5 | 118 | 56 | 76.67 | 53 | 7    | 7.5 | 4.6 | 1.6 | 1.2 | 31  | 53  | 185 | 239 | 235 | 129 | 55 | 154.2 | 6   | 68.8 | 492 | 15.4 | 45.2 | 21.4 | 228 | 15.7 | 0.96 | 142 | 4.3 | 103 | 9.6 | 5.9 | 85  | 17   | 14.6 | 0.7 | 0.7 |
| 65 M | 165.8 | 58.8 | 21.39 | 15.4 | 73   | 139 | 73 | 95    | 48 | 12.3 | 6.9 | 4.3 | 1.7 | 0.8 | 22  | 21  | 31  | 143 | 146 | 45  | 53 | 84    | 6   | 49.3 | 467 | 14.8 | 45.6 | 20   | 257 | 20.8 | 0.79 | 142 | 4   | 103 | 9.1 | 4.1 | 89  | 12.5 | 15.3 | 0.7 | 0.7 |
| 62 F | 149.3 | 45.8 | 20.55 | 25.5 | 73   | 113 | 70 | 84.33 | 81 | 8    | 7.6 | 4.4 | 1.4 | 1   | 22  | 15  | 20  | 124 | 239 | 70  | 58 | 167   | 5.6 | 38.3 | 424 | 13.3 | 40.3 | 22.5 | 317 | 15   | 0.63 | 146 | 4.7 | 103 | 9.3 | 4.7 | 107 | 14.1 | 11.7 | 0.7 | 0.5 |
| 66 M | 168.1 | 72.5 | 25.66 | 23.2 | 83.5 | 123 | 85 | 97.67 | 55 | 6.8  | 7.6 | 4.4 | 1.4 | 1.1 | 29  | 36  | 32  | 261 | 171 | 95  | 55 | 97    | 4.8 | 54.6 | 502 | 16.1 | 46.2 | 15.1 | 277 | 15.3 | 0.75 | 145 | 4.6 | 105 | 9.4 | 5.8 | 69  | 10   | 9.8  | 1   | 0.9 |
| 61 M | 170.1 | 57.6 | 19.91 | 14.3 | 69   | 137 | 85 | 102.3 | 73 | 11.8 | 7.3 | 4.7 | 1.8 | 1   | 20  | 18  | 30  | 202 | 218 | 121 | 70 | 123.8 | 5.4 | 54.3 | 504 | 15   | 46.5 | 22.9 | 236 | 15.4 | 0.88 | 147 | 4.4 | 104 | 9.4 | 5.6 | 78  | 13.5 | 10.2 | 0.5 | 0.5 |
| 71 M | 156.9 | 70.9 | 28.8  | 29.4 | 93   | 148 | 83 | 104.7 | 70 | 8.5  | 7.5 | 4.3 | 1.3 | 0.6 | 20  | 21  | 23  | 199 | 209 | 61  | 56 | 140.8 | 6.6 | 77.8 | 443 | 13.2 | 40   | 21.3 | 340 | 21.6 | 0.87 | 145 | 4.3 | 104 | 9   | 6.1 | 90  | 11.4 | 12.4 | 0.7 | 0.9 |
| 55 M | 177.5 | 80.4 | 25.52 | 28.3 | 90   | 129 | 75 | 93    | 74 | 15   | 8   | 4.6 | 1.4 | 0.4 | 38  | 31  | 50  | 205 | 251 | 779 | 64 | 31.2  | 4.9 | 42   | 444 | 15.3 | 43.8 | 15.8 | 221 | 16.8 | 0.89 | 144 | 4.5 | 103 | 9   | 8.9 | 74  | 13.4 | 13.7 | 0.7 | 0.5 |
| 51 M | 170.2 | 77.5 | 26.75 | 30.7 | 88   | 158 | 86 | 110   | 72 | 3.2  | 7.7 | 4.3 | 1.3 | 0.6 | 34  | 30  | 213 | 255 | 203 | 259 | 49 | 102.2 | 6.7 | 79.2 | 494 | 15.6 | 45.5 | 29.5 | 386 | 13.5 | 0.68 | 142 | 4.2 | 101 | 9   | 5.9 | 80  | 12.5 | 15.7 | 0.7 | 0.7 |
| 56 M | 171.4 | 81.2 | 27.64 | 30   | 89   | 133 | 86 | 101.7 | 76 | 3.6  | 7.8 | 4.6 | 1.4 | 0.6 | 49  | 95  | 367 | 220 | 209 | 284 | 41 | 111.2 | 5.5 | 89.5 | 470 | 15.1 | 45.1 | 20.5 | 317 | 18.7 | 0.84 | 145 | 4.6 | 102 | 9.4 | 6.6 | 58  | 8.9  | 8.7  | 0.7 | 0.8 |
| 88 M | 164.4 | 45.9 | 16.98 | 11.2 | 61   | 113 | 59 | 77    | 67 | 106  | 7.3 | 4.5 | 1.6 | 0.8 | 43  | 26  | 35  | 231 | 176 | 84  | 54 | 105.2 | 5.2 | 37.2 | 395 | 12.4 | 38.1 | 13.3 | 286 | 19.2 | 0.96 | 143 | 4.8 | 99  | 8.9 | 5.4 | 145 | 8.3  | 8.6  | 0.8 | 0.9 |
| 50 M | 163.7 | 70.2 | 26.2  | 22.9 | 82   | 136 | 82 | 100   | 40 | 2.3  | 7.3 | 4.5 | 1.6 | 0.7 | 20  | 19  | 25  | 203 | 180 | 214 | 47 | 90.2  | 5.8 | 91.8 | 502 | 15.5 | 45.9 | 18.6 | 277 | 17.1 | 0.77 | 145 | 3.8 | 103 | 9.3 | 5   | 56  | 9    | 8    | 0.5 | 0.8 |
| 65 F | 149.9 | 51.2 | 22.79 | 31.2 | 85   | 135 | 70 | 91.67 | 62 | 16.6 | 7.3 | 4.4 | 1.5 | 1.1 | 16  | 14  | 11  | 311 | 209 | 95  | 61 | 129   | 5.4 | 56.3 | 486 | 14.4 | 44   | 17.8 | 311 | 20   | 0.63 | 144 | 4.3 | 101 | 9.4 | 6.7 | 81  | 10   | 9.7  | 0.7 | 0.8 |
| 57 F | 154.5 | 53.3 | 22.33 | 34.6 | 89   | 106 | 54 | 71.33 | 73 | 14.2 | 7.5 | 4.5 | 1.5 | 1   | 20  | 15  | 13  | 353 | 228 | 96  | 69 | 139.8 | 5.3 | 60.8 | 497 | 13.8 | 41.9 | 20.1 | 360 | 19.3 | 0.89 | 145 | 4.3 | 103 | 9.5 | 5.5 | 81  | 15.4 | 16.3 | 0.7 | 0.7 |
| 69 F | 146.3 | 40.1 | 18.74 | 22.8 | 66.5 | 115 | 58 | 77    | 55 | 22.6 | 7   | 4.3 | 1.6 | 0.6 | 27  | 21  | 16  | 180 | 237 | 88  | 87 | 132.4 | 5.2 | 43.7 | 416 | 12.5 | 38.8 | 24.6 | 261 | 15.8 | 0.47 | 145 | 3.7 | 105 | 8.7 | 3.2 | 73  | 16.5 | 16.1 | 0.9 | 0.8 |
| 67 F | 151.5 | 61.5 | 26.79 | 40.6 | 83.5 | 134 | 75 | 94.67 | 76 | 29   | 7.2 | 4.4 | 1.6 | 0.5 | 29  | 28  | 108 | 277 | 200 | 213 | 50 | 107.4 | 5.4 | 79.7 | 416 | 13   | 37.8 | 25   | 347 | 18   | 0.67 | 144 | 4   | 103 | 9.2 | 4.8 | 62  | 16.3 | 16.1 | 0.5 | 0.7 |
| 51 M | 161.8 | 53.4 | 20.4  | 22.4 | 71.5 | 118 | 81 | 93.33 | 70 | 3.5  | 7.4 | 4.6 | 1.6 | 0.8 | 25  | 21  | 24  | 135 | 197 | 94  | 77 | 101.2 | 5.1 | 49.7 | 490 | 15.3 | 45.2 | 16.2 | 286 | 19   | 0.93 | 145 | 4   | 102 | 9.6 | 3.7 | 74  | 10.1 | 8.3  | 0.7 | 0.5 |
| 69 F | 150.5 | 50.9 | 22.47 | 30   | 82   | 120 | 77 | 91.33 | 69 | 5.4  | 7.8 | 4.5 | 1.4 | 0.6 | 22  | 15  | 14  | 158 | 218 | 76  | 57 | 145.8 | 5.2 | 45.9 | 424 | 12.6 | 38.6 | 21.5 | 317 | 13.9 | 0.61 | 144 | 3.9 | 103 | 9.3 | 5.5 | 100 | 11   | 11   | 0.8 | 1   |
| 48 M | 165   | 73.3 | 26.92 | 30.7 | 91.5 | 140 | 86 | 104   | 68 | 7.5  | 7.2 | 4.5 | 1.7 | 0.9 | 15  | 18  | 23  | 358 | 209 | 118 | 54 | 131.4 | 4.9 | 58.4 | 509 | 15.9 | 46.7 | 29.3 | 296 | 11.4 | 0.76 | 142 | 4.5 | 101 | 9.5 | 5.5 | 70  | 12.5 | 14.1 | 0.7 | 0.5 |
| 47 F | 161.3 | 64.5 | 24.79 | 35.5 | 85   | 134 | 80 | 98    | 71 | 3.2  | 7.2 | 4.1 | 1.3 | 0.5 | 21  | 34  | 80  | 153 | 227 | 109 | 57 | 148.2 | 5.1 | 75.2 | 471 | 13.9 | 43.7 | 35.1 | 311 | 8.2  | 0.62 | 143 | 4.2 | 102 | 9.1 | 4.8 | 73  | 12   | 11.9 | 1.1 | 0.8 |
| 69 M | 163.5 | 64.2 | 24.02 | 21.1 | 74.5 | 151 | 80 | 103.7 | 63 | 4.1  | 7.1 | 4.3 | 1.5 | 0.5 | 18  | 15  | 26  | 173 | 152 | 62  | 52 | 87.6  | 5.3 | 73.5 | 481 | 14.3 | 43.3 | 22.7 | 347 | 22.9 | 0.79 | 144 | 4.2 | 103 | 9   | 5.2 | 90  | 11.7 | 10.7 | 0.9 | 0.8 |
| 62 F | 157.6 | 44.5 | 17.92 | 21.7 | 70   | 139 | 75 | 96.33 | 81 | 44.3 | 7.5 | 4.6 | 1.6 | 0.8 | 23  | 13  | 12  | 285 | 212 | 54  | 67 | 134.2 | 5   | 41.1 | 461 | 13.8 | 43.8 | 19.2 | 265 | 12.8 | 0.74 | 144 | 4   | 100 | 9.3 | 4.4 | 108 | 13.6 | 15.5 | 1.1 | 1.1 |
| 83 M | 152.7 | 52.2 | 22.39 | 19.1 | 79   | 133 | 81 | 98.33 | 67 | 122  | 7.5 | 4.3 | 1.3 | 0.7 | 21  | 13  | 34  | 254 | 151 | 122 | 48 | 78.6  | 5.7 | 82.6 | 503 | 15.2 | 46.4 | 21.4 | 368 | 14   | 0.97 | 145 | 4.9 | 103 | 9.2 | 7   | 80  | 14.3 | 11.7 | 1.1 | 1.6 |
| 79 F | 134.1 | 42.8 | 23.8  | 31.7 | 84   | 131 | 75 | 93.67 | 95 | 17.4 | 8.1 | 4.7 | 1.4 | 0.6 | 40  | 16  | 41  | 273 | 204 | 128 | 71 | 107.4 | 4.6 | 74.9 | 463 | 14.6 | 45.7 | 24.4 | 360 | 12.3 | 0.4  | 144 | 4.1 | 102 | 8.8 | 3.8 | 72  | 13.6 | 15.1 | 0.8 | 0.7 |
| 57 M | 161.1 | 51.6 | 19.88 | 17.5 | 69   | 120 | 77 | 91.33 | 52 | 2.1  | 7.2 | 4.4 | 1.6 | 1.1 | 14  | 13  | 31  | 189 | 196 | 134 | 52 | 117.2 | 5   | 41.7 | 455 | 14.5 | 44   | 23.1 | 334 | 14.8 | 0.89 | 143 | 4   | 101 | 9.1 | 5.2 | 72  | 11.5 | 11.9 | 0.5 | 0.7 |
| 53 F | 159.3 | 51.9 | 20.45 | 25.9 | 69   | 121 | 67 | 85    | 75 | 2.5  | 7.7 | 4.5 | 1.4 | 1.2 | 25  | 19  | 12  | 244 | 206 | 40  | 80 | 118   | 4.9 | 75.6 | 453 | 13.7 | 42.2 | 22.4 | 368 | 26.8 | 0.71 | 144 | 4.1 | 103 | 9.6 | 3.6 | 97  | 10.5 | 9.3  | 0.8 | 0.8 |
| 56 M | 168.5 | 68.7 | 24.2  | 22.9 | 84   | 119 | 68 | 85    | 65 | 9    | 7.6 | 4.4 | 1.4 | 0.8 | 19  | 23  | 37  | 290 | 217 | 97  | 71 | 126.6 | 5.2 | 59.1 | 502 | 16.3 | 46.7 | 22.8 | 231 | 11.6 | 0.84 | 143 | 4.2 | 102 | 9.3 | 3.6 | 79  | 13.8 | 9.6  | 0.7 | 0.7 |
| 59 M | 168.3 | 51.1 | 18.04 | 18.9 | 71   | 126 | 80 | 95.33 | 85 | 8.1  | 7.8 | 4.8 | 1.6 | 1   | 35  | 39  | 264 | 354 | 268 | 194 | 81 | 148.2 | 4.9 | 49.2 | 464 | 14.7 | 44.4 | 20.1 | 296 | 11.8 | 0.71 | 145 | 3.9 | 101 | 9.3 | 6.4 | 110 | 15.7 | 14.9 | 0.5 | 0.5 |
| 53 M | 171.2 | 67.9 | 23.17 | 23.7 | 77.5 | 111 | 72 | 85    | 62 | 13.2 | 6.9 | 4.3 | 1.7 | 1   | 22  | 18  | 159 | 221 | 259 | 226 | 73 | 140.8 | 5.1 | 59.8 | 509 | 16.6 | 49   | 18.2 | 317 | 14.8 | 0.86 | 145 | 4.3 | 104 | 8.9 | 5.9 | 55  | 14.1 | 14.7 | 0.8 | 0.8 |
| 67 F | 148.5 | 38.6 | 17.5  | 21.7 | 71   | 138 | 76 | 96.67 | 66 | 26.3 | 8   | 4.5 | 1.3 | 0.4 | 21  | 18  | 17  | 214 | 244 | 81  | 82 | 145.8 | 7.7 | 69.9 | 405 | 11.8 | 35.8 | 30.3 | 317 | 16.7 | 0.69 | 140 | 4.6 | 103 | 9.5 | 3.8 | 72  | 12.6 | 15.8 | 0.9 | 1.2 |
| 58 M | 159.1 | 72.1 | 28.48 | 24.3 | 86   | 161 | 88 | 112.3 | 58 | 3.8  | 7.4 | 4.6 | 1.6 | 0.5 | 21  | 31  | 35  | 256 | 202 | 288 | 37 | 107.4 | 8.2 | 58.2 | 516 | 15.7 | 46.7 | 21.3 | 277 | 15   | 0.85 | 143 | 3.9 | 101 | 9.4 | 4.4 | 76  | 15.7 | 15.9 | 0.9 | 0.8 |
| 61 F | 154.9 | 62.2 | 25.92 | 33.7 | 89   | 107 | 61 | 76.33 | 67 | 5.5  | 7.7 | 4.6 | 1.5 | 0.8 | 24  | 32  | 73  | 335 | 218 | 59  | 67 | 139.2 | 5.8 | 65.9 | 453 | 13.8 | 42.5 | 20.8 | 301 | 17   | 0.53 | 144 | 4   | 103 | 9.2 | 4.3 | 60  | 10.8 | 11   | 0.5 | 0.5 |
| 65 F | 151.7 | 53.8 | 23.38 | 33.5 | 82.5 | 127 | 75 | 92.33 | 78 | 16.6 | 7.6 | 4.7 | 1.6 | 0.5 | 22  | 16  | 28  | 220 | 178 | 72  | 87 | 76.6  | 5.3 | 49.2 | 454 | 13.7 | 41.1 | 25.3 | 375 | 12.5 | 0.52 | 145 | 4.3 | 106 | 9.4 | 4.1 | 87  | 8.3  | 15.5 | 0.5 | 0.7 |
| 64 F | 150.1 | 47.7 | 21.17 | 26.2 | 79   | 129 | 63 | 85    | 72 | 4.7  | 7.2 | 4.5 | 1.7 | 0.7 | 20  | 17  | 23  | 186 | 206 | 150 | 55 | 121   | 5.9 | 59.7 | 450 | 13.3 | 40.3 | 22.7 | 219 | 15.4 | 0.65 | 143 | 4.1 | 100 | 9.5 | 5.1 | 67  | 15.3 | 17.5 | 0.8 | 1.7 |
| 62 F | 146   | 51.6 | 24.21 | 33   | 86   | 147 | 88 | 107.7 | 78 | 39.2 | 9   | 4.2 | 0.9 | 0.6 | 103 | 125 | 65  | 341 | 208 | 91  | 49 | 140.8 | 5.3 | 59.8 | 443 | 13.4 | 41.9 | 19.1 | 291 | 15.3 | 0.57 | 142 | 3.7 | 103 | 9.2 | 5.3 | 84  | 17.7 | 20.4 | 0.5 | 0.7 |
| 62 M | 162.4 | 69.2 | 26.24 | 24.8 | 83   | 145 | 72 | 96.33 | 74 | 19.3 | 7.5 | 4.7 | 1.7 | 0.9 | 35  | 39  | 58  | 333 | 197 | 90  | 58 | 121   | 5.1 | 64.6 | 490 | 15.7 | 46.6 | 17.8 | 239 | 17.6 | 0.74 | 144 | 3.9 |     |     |     |     |      |      |     |     |

|      |       |      |       |      |      |     |    |       |     |      |     |     |     |     |    |     |     |     |     |     |    |       |     |      |     |      |      |      |     |      |      |     |     |     |     |     |     |      |      |     |     |
|------|-------|------|-------|------|------|-----|----|-------|-----|------|-----|-----|-----|-----|----|-----|-----|-----|-----|-----|----|-------|-----|------|-----|------|------|------|-----|------|------|-----|-----|-----|-----|-----|-----|------|------|-----|-----|
| 65 F | 153.3 | 57   | 24.25 | 33.2 | 72   | 117 | 65 | 82.33 | 65  | 19.1 | 7.4 | 4.1 | 1.2 | 0.5 | 20 | 16  | 17  | 230 | 228 | 200 | 73 | 115   | 5.2 | 39.7 | 450 | 14   | 43.1 | 19.1 | 253 | 13.6 | 0.68 | 145 | 4   | 104 | 9.3 | 3.9 | 59  | 10.8 | 13.3 | 0.7 | 0.8 |
| 65 F | 158.5 | 55.3 | 22.01 | 27.7 | 82   | 138 | 76 | 96.67 | 74  | 10.5 | 7.2 | 4.5 | 1.7 | 0.5 | 33 | 29  | 60  | 191 | 210 | 56  | 73 | 125.8 | 4.7 | 38.7 | 447 | 14   | 42.9 | 14.8 | 318 | 10.3 | 0.56 | 146 | 4.5 | 104 | 9.7 | 3.3 | 73  | 14.8 | 11.5 | 0.7 | 0.7 |
| 52 F | 160.4 | 52   | 20.21 | 27.3 | 74   | 138 | 68 | 91.33 | 62  | 11.9 | 7.3 | 4.8 | 1.9 | 0.5 | 29 | 44  | 78  | 254 | 253 | 92  | 93 | 141.6 | 6   | 53.6 | 452 | 13.1 | 40.9 | 32.4 | 285 | 12   | 0.51 | 142 | 4   | 101 | 9.5 | 4.9 | 80  | 14.1 | 14.4 | 0.5 | 0.7 |
| 60 M | 176.8 | 78   | 24.95 | 22.7 | 86   | 135 | 72 | 93    | 63  | 18.7 | 7.3 | 4.3 | 1.4 | 0.8 | 26 | 20  | 32  | 184 | 246 | 166 | 64 | 148.8 | 6   | 63.7 | 473 | 14.4 | 43.8 | 20.6 | 264 | 14.5 | 1.18 | 142 | 4.2 | 103 | 9.6 | 8.5 | 92  | 12.5 | 12.9 | 0.7 | 0.7 |
| 66 F | 152.6 | 50.1 | 21.51 | 28.9 | 77   | 130 | 67 | 88    | 81  | 9.7  | 6.7 | 4.2 | 1.7 | 0.7 | 20 | 21  | 16  | 233 | 216 | 112 | 63 | 130.6 | 5.1 | 57.7 | 457 | 13.9 | 43.4 | 21.7 | 261 | 11.7 | 0.81 | 142 | 4.4 | 102 | 9   | 3.5 | 110 | 12.8 | 11.4 | 0.7 | 0.7 |
| 41 F | 153   | 55.4 | 23.67 | 36.9 | 75   | 128 | 81 | 96.67 | 70  | 4.2  | 7.7 | 4.6 | 1.5 | 0.7 | 25 | 24  | 17  | 166 | 191 | 84  | 82 | 92.2  | 4.9 | 62.9 | 476 | 14.7 | 44.7 | 24.5 | 261 | 16.2 | 0.63 | 142 | 3.9 | 103 | 9.6 | 4.6 | 79  | 17.4 | 14.1 | 0.7 | 0.7 |
| 58 M | 161   | 58.9 | 22.72 | 20.5 | 81   | 135 | 70 | 91.67 | 62  | 22.1 | 6.9 | 4.5 | 1.8 | 0.6 | 22 | 21  | 23  | 159 | 215 | 98  | 73 | 122.4 | 8   | 57.5 | 521 | 15.6 | 46.5 | 16.3 | 298 | 13   | 0.7  | 144 | 4.9 | 104 | 9.5 | 4.3 | 82  | 14.6 | 16.4 | 1.8 | 0.8 |
| 57 F | 155.4 | 63.8 | 26.42 | 39.2 | 99   | 122 | 71 | 88    | 86  | 2.8  | 7.7 | 4.2 | 1.2 | 0.8 | 19 | 20  | 66  | 929 | 228 | 119 | 78 | 126.2 | 5.3 | 48   | 492 | 15   | 44   | 27.9 | 348 | 11.2 | 0.52 | 146 | 3.9 | 104 | 9.6 | 4.8 | 84  | 17.3 | 18.2 | 0.5 | 0.7 |
| 62 F | 149.4 | 48.8 | 21.86 | 28.3 | 77   | 108 | 60 | 76    | 57  | 16.5 | 7.6 | 4.5 | 1.4 | 0.8 | 36 | 48  | 34  | 227 | 253 | 66  | 84 | 155.8 | 5.6 | 53.3 | 459 | 14.6 | 43.8 | 15.3 | 264 | 15.3 | 0.81 | 143 | 4.3 | 103 | 9.5 | 3.1 | 87  | 7.9  | 9.1  | 0.7 | 0.7 |
| 55 F | 159.4 | 77.6 | 30.54 | 41.2 | 91   | 145 | 84 | 104.3 | 81  | 40.3 | 7.6 | 4.5 | 1.4 | 0.6 | 22 | 24  | 46  | 320 | 205 | 192 | 45 | 121.6 | 6   | 54.7 | 420 | 12.7 | 39.5 | 19.7 | 324 | 13.3 | 0.53 | 143 | 4   | 105 | 9.2 | 5.2 | 58  | 17.9 | 15.1 | 0.7 | 0.7 |
| 65 F | 154.1 | 52.2 | 21.98 | 29.7 | 73   | 119 | 69 | 85.67 | 54  | 19.5 | 7.8 | 4.4 | 1.3 | 0.5 | 20 | 17  | 14  | 175 | 226 | 57  | 63 | 151.6 | 5.5 | 57.4 | 439 | 12.9 | 40.6 | 20.4 | 329 | 15.2 | 0.59 | 144 | 3.9 | 102 | 9.5 | 2.7 | 118 | 14.1 | 15.1 | 0.7 | 0.8 |
| 73 F | 150.8 | 51.5 | 22.65 | 27.1 | 75   | 110 | 67 | 81.33 | 120 | 77   | 7.6 | 4.3 | 1.3 | 0.9 | 30 | 32  | 34  | 341 | 133 | 62  | 62 | 58.6  | 9.8 | 63.9 | 493 | 15.2 | 45.1 | 14.1 | 285 | 17.7 | 0.62 | 140 | 4.4 | 99  | 9.4 | 2.9 | 78  | 13.6 | 12.1 | 0.8 | 0.9 |
| 45 F | 159.7 | 52.8 | 20.7  | 26.6 | 73   | 104 | 55 | 71.33 | 60  | 5.4  | 7.2 | 4.3 | 1.5 | 0.6 | 21 | 16  | 13  | 165 | 208 | 85  | 66 | 125   | 5.1 | 62.8 | 485 | 13.5 | 41.8 | 25.3 | 231 | 9.6  | 0.61 | 142 | 3.9 | 104 | 9.1 | 3.7 | 100 | 10.2 | 12.5 | 0.8 | 0.5 |
| 59 F | 156.9 | 53.8 | 21.85 | 28.9 | 69   | 150 | 84 | 106   | 68  | 13.5 | 7.4 | 4.7 | 1.7 | 0.8 | 15 | 12  | 15  | 235 | 221 | 154 | 66 | 124.2 | 5.7 | 58.1 | 442 | 13.7 | 41.5 | 21.1 | 308 | 11.2 | 0.67 | 144 | 3.9 | 105 | 9.5 | 3.9 | 63  | 13.4 | 11.7 | 0.5 | 0.7 |
| 55 F | 153.9 | 51.5 | 21.74 | 26.9 | 66   | 118 | 76 | 90    | 69  | 5.4  | 7.1 | 4.6 | 1.8 | 0.9 | 18 | 15  | 21  | 268 | 182 | 60  | 78 | 92    | 5.7 | 67.8 | 490 | 13.7 | 43.7 | 21.8 | 264 | 19.6 | 0.58 | 146 | 5.1 | 107 | 9.6 | 3.8 | 93  | 13.1 | 12   | 0.5 | 0.7 |
| 63 M | 166.2 | 67.8 | 24.55 | 21   | 83   | 110 | 55 | 73.33 | 68  | 9    | 7.6 | 4.4 | 1.4 | 1.1 | 21 | 17  | 29  | 198 | 223 | 81  | 52 | 154.8 | 5   | 56.1 | 462 | 16   | 47.6 | 23.1 | 216 | 13   | 0.77 | 144 | 3.6 | 102 | 9.1 | 4.8 | 113 | 8.9  | 8.3  | 0.7 | 0.7 |
| 43 M | 166.3 | 68.7 | 24.84 | 31   | 86   | 121 | 71 | 87.67 | 62  | 3.7  | 7.3 | 4.2 | 1.4 | 1.2 | 37 | 104 | 146 | 259 | 254 | 72  | 70 | 169.6 | 5   | 61   | 514 | 15.1 | 45   | 25.1 | 244 | 20.6 | 0.91 | 143 | 4.2 | 105 | 9.4 | 7.8 | 98  | 9.5  | 9.8  | 0.7 | 0.9 |
| 62 F | 149.3 | 52.1 | 23.37 | 34   | 82   | 112 | 63 | 79.33 | 50  | 49.9 | 7.4 | 4.5 | 1.6 | 1.1 | 33 | 32  | 30  | 212 | 229 | 105 | 67 | 141   | 6.3 | 65.8 | 455 | 13.7 | 41.5 | 24.8 | 272 | 15.2 | 0.68 | 141 | 4.5 | 103 | 9.6 | 3.9 | 123 | 13.6 | 15.2 | 0.5 | 0.7 |
| 68 M | 162.5 | 55.3 | 20.94 | 17.5 | 76   | 127 | 60 | 82.33 | 91  | 8.1  | 7.3 | 4   | 1.2 | 0.4 | 20 | 23  | 37  | 200 | 184 | 157 | 49 | 103.6 | 4.8 | 31.9 | 410 | 12.2 | 38.1 | 23.2 | 348 | 13.3 | 0.69 | 140 | 4.5 | 102 | 9.3 | 6   | 96  | 10   | 10.4 | 0.7 | 0.8 |
| 68 M | 167.9 | 68.2 | 24.19 | 20.8 | 85   | 117 | 63 | 81    | 65  | 150  | 7.5 | 4   | 1.1 | 0.8 | 26 | 15  | 35  | 166 | 167 | 54  | 65 | 91.2  | 5   | 49   | 473 | 14.7 | 45.4 | 15   | 264 | 14.2 | 0.81 | 143 | 4   | 103 | 9   | 6.1 | 66  | 16.3 | 10.3 | 0.7 | 0.5 |
| 68 M | 164.7 | 65.7 | 24.22 | 25.3 | 77   | 121 | 64 | 83    | 65  | 31.7 | 7.5 | 4.5 | 1.5 | 0.7 | 16 | 15  | 56  | 231 | 196 | 111 | 49 | 124.8 | 4.8 | 66.1 | 470 | 14.4 | 43   | 26.8 | 298 | 17.7 | 0.69 | 141 | 4.6 | 102 | 9.5 | 4.7 | 62  | 10.3 | 11.1 | 0.7 | 0.8 |
| 69 M | 162.1 | 66.3 | 25.23 | 30   | 83   | 123 | 74 | 90.33 | 62  | 26.7 | 7.1 | 4.2 | 1.4 | 0.9 | 24 | 21  | 58  | 156 | 195 | 131 | 57 | 111.8 | 5   | 76.3 | 465 | 14.9 | 43.7 | 27.1 | 341 | 9.1  | 0.68 | 139 | 4.3 | 97  | 9.5 | 5.9 | 75  | 16.3 | 17   | 0.7 | 0.7 |
| 57 F | 153.9 | 48.9 | 20.65 | 27.3 | 83.5 | 110 | 67 | 81.33 | 85  | 7.1  | 7.6 | 4.4 | 1.4 | 0.5 | 24 | 27  | 20  | 242 | 221 | 89  | 61 | 142.2 | 5.2 | 49.3 | 426 | 12.8 | 38.4 | 22.3 | 276 | 16.9 | 0.62 | 140 | 4.6 | 102 | 9.4 | 5.7 | 65  | 7.9  | 9.2  | 0.7 | 0.7 |
| 59 F | 159.1 | 60.5 | 23.9  | 35.2 | 91   | 122 | 68 | 86    | 57  | 41   | 8.2 | 4.4 | 1.2 | 0.4 | 15 | 14  | 16  | 317 | 225 | 116 | 56 | 145.8 | 6.2 | 71.5 | 511 | 14.7 | 44.9 | 26.1 | 341 | 12.7 | 0.72 | 143 | 4.5 | 104 | 9.8 | 6.6 | 77  | 19.1 | 13.9 | 0.7 | 0.7 |
| 67 F | 148.2 | 55   | 25.04 | 38.7 | 90   | 153 | 82 | 105.7 | 54  | 33.7 | 7.7 | 4.4 | 1.3 | 1   | 22 | 18  | 16  | 323 | 241 | 114 | 55 | 163.2 | 5.2 | 71   | 487 | 14.9 | 45.9 | 30.6 | 285 | 14.3 | 0.45 | 143 | 3.8 | 101 | 9.2 | 4.7 | 87  | 15.8 | 11.2 | 1.3 | 1.5 |
| 79 M | 160.5 | 65.1 | 25.27 | 18.6 | 83   | 138 | 76 | 96.67 | 57  | 91.2 | 7.3 | 4.2 | 1.4 | 0.6 | 31 | 27  | 32  | 142 | 188 | 77  | 68 | 104.6 | 6.1 | 47.5 | 452 | 15.2 | 45.6 | 16.6 | 298 | 20   | 0.85 | 142 | 4.8 | 101 | 9   | 7.6 | 67  | 17.2 | 17.1 | 0.8 | 0.9 |
| 66 F | 153.3 | 50.2 | 21.36 | 27.6 | 86   | 137 | 74 | 95    | 71  | 9.3  | 7.9 | 4.3 | 1.2 | 0.5 | 25 | 24  | 17  | 264 | 232 | 106 | 55 | 155.8 | 5.4 | 46.6 | 431 | 13.3 | 41.4 | 19.7 | 285 | 14.1 | 0.73 | 142 | 4.1 | 101 | 9.4 | 5.3 | 84  | 12.8 | 15   | 0.7 | 0.8 |
| 64 F | 150.1 | 54.7 | 24.28 | 32.4 | 87   | 160 | 85 | 110   | 64  | 4.7  | 7.4 | 4.4 | 1.5 | 0.7 | 21 | 24  | 42  | 220 | 251 | 161 | 62 | 156.8 | 5.5 | 59.1 | 469 | 14.6 | 44.2 | 25   | 313 | 16   | 0.57 | 144 | 3.8 | 103 | 9.4 | 4.6 | 79  | 17.4 | 13.6 | 1.3 | 1.4 |
| 57 M | 164.1 | 62.2 | 23.1  | 23.2 | 79.5 | 145 | 77 | 99.67 | 60  | 24   | 7.6 | 4.4 | 1.4 | 1   | 23 | 18  | 27  | 232 | 137 | 58  | 58 | 67.4  | 6.1 | 69.8 | 434 | 13.3 | 40.8 | 27.5 | 388 | 13.6 | 0.74 | 145 | 4.4 | 104 | 9.5 | 4.9 | 86  | 17.8 | 17.6 | 0.9 | 0.9 |
| 52 F | 152.1 | 51.6 | 22.3  | 31.1 | 77   | 112 | 65 | 80.67 | 69  | 3.3  | 7.9 | 4.5 | 1.3 | 0.6 | 23 | 17  | 23  | 123 | 254 | 144 | 53 | 172.2 | 5.5 | 58.5 | 427 | 13.5 | 41.8 | 37.3 | 329 | 12.9 | 0.74 | 144 | 4.2 | 102 | 9.9 | 5.1 | 83  | 14.3 | 15.1 | 0.5 | 0.8 |
| 57 F | 156.6 | 42.3 | 17.25 | 21.5 | 70   | 150 | 68 | 95.33 | 76  | 12.1 | 7.4 | 4.5 | 1.6 | 0.8 | 21 | 13  | 13  | 188 | 233 | 73  | 90 | 128.4 | 5.5 | 61.3 | 486 | 14.5 | 44.4 | 28.6 | 368 | 18.7 | 0.63 | 143 | 4.7 | 101 | 9.9 | 4.3 | 57  | 12.9 | 13.5 | 0.7 | 0.5 |
| 66 F | 159.5 | 49.9 | 19.61 | 23   | 62.5 | 148 | 81 | 103.3 | 70  | 15.5 | 7.9 | 4.5 | 1.3 | 0.8 | 23 | 15  | 12  | 342 | 292 | 111 | 82 | 187.8 | 5.6 | 53.3 | 476 | 14   | 44.4 | 31.8 | 261 | 15.1 | 0.6  | 143 | 4.5 | 102 | 9.6 | 3.7 | 107 | 16.3 | 12.9 | 1.2 | 0.9 |
| 69 F | 149.5 | 50.2 | 22.46 | 28.8 | 85   | 118 | 57 | 77.33 | 72  | 28.4 | 7.3 | 4.3 | 1.4 | 0.6 | 30 | 18  | 13  | 187 | 248 | 38  | 89 | 151.4 | 5.8 | 46.4 | 396 | 12.1 | 37.7 | 14.2 | 289 | 17.4 | 0.48 | 144 | 3.8 | 103 | 9.2 | 3.6 | 45  | 13.5 | 11.3 | 0.8 | 0.8 |
| 56 F | 158.8 | 54.5 | 21.61 | 26.7 | 70.5 | 159 | 80 | 106.3 | 63  | 9.5  | 7.6 | 4.7 | 1.6 | 0.9 | 25 | 33  | 45  | 163 | 226 | 212 | 67 | 116.6 | 6.7 | 59.2 | 446 | 13.6 | 41.9 | 33.5 | 261 | 14.8 | 0.59 | 144 | 4.2 | 101 | 9.8 | 6.5 | 77  | 14.8 | 15.1 | 1.3 | 1.4 |
| 68 F | 151.8 | 52.4 | 22.74 | 26.8 | 87   | 147 | 77 | 100.3 | 101 | 4.8  | 7.6 | 4.3 | 1.3 | 0.5 | 28 | 25  | 134 | 289 | 178 | 92  | 78 | 81.6  | 5.5 | 68.3 | 420 | 13.1 | 39.9 | 23.2 | 324 | 12.9 | 0.62 | 144 | 4   | 102 | 9.3 | 5.4 | 65  | 18.2 | 20.8 | 0.7 | 0.9 |
| 62 F | 147.7 | 52.1 | 23.88 | 29.2 | 83   | 128 | 75 | 92.67 | 61  | 9.9  | 7.8 | 4.4 | 1.3 | 0.6 | 18 | 14  | 20  | 205 | 232 | 169 | 71 | 127.2 | 5.7 | 55.2 | 380 | 12.5 | 37.6 | 24.7 | 341 | 16.3 | 0.64 |     |     |     |     |     |     |      |      |     |     |

|      |       |      |       |      |      |     |    |       |     |      |     |     |     |     |    |    |     |     |     |     |    |       |     |       |     |      |      |      |     |      |      |     |     |     |     |     |     |      |      |     |       |
|------|-------|------|-------|------|------|-----|----|-------|-----|------|-----|-----|-----|-----|----|----|-----|-----|-----|-----|----|-------|-----|-------|-----|------|------|------|-----|------|------|-----|-----|-----|-----|-----|-----|------|------|-----|-------|
| 66 F | 151   | 55.4 | 24.3  | 31.2 | 82   | 117 | 64 | 81.67 | 69  | 3.5  | 8.1 | 4.7 | 1.4 | 0.7 | 20 | 13 | 20  | 297 | 221 | 92  | 68 | 134.6 | 5.6 | 78.2  | 475 | 14.1 | 42.5 | 22.1 | 335 | 11.4 | 0.64 | 142 | 3.6 | 100 | 9.3 | 4.4 | 93  | 12.4 | 10.7 | 0.7 | 0.7   |
| 69 M | 163.3 | 51.9 | 19.46 | 16.8 | 74   | 145 | 76 | 99    | 61  | 6.9  | 7.3 | 4.2 | 1.4 | 1.2 | 24 | 17 | 24  | 163 | 174 | 90  | 54 | 102   | 4.7 | 49.5  | 421 | 13.6 | 42.1 | 19.7 | 341 | 16.4 | 0.88 | 142 | 4.1 | 103 | 9.1 | 5.9 | 87  | 15.9 | 10.8 | 0.8 | 1.5   |
| 63 F | 153.9 | 46.6 | 19.67 | 23.6 | 65   | 114 | 65 | 81.33 | 81  | 7.9  | 7.3 | 4.8 | 1.9 | 0.9 | 24 | 26 | 21  | 213 | 212 | 48  | 70 | 132.4 | 5   | 51.1  | 456 | 14.4 | 44   | 19.9 | 261 | 15.4 | 0.7  | 145 | 4.4 | 106 | 9.8 | 4.9 | 103 | 8.3  | 10   | 0.5 | 0.7   |
| 71 F | 150.5 | 42.9 | 18.94 | 21.4 | 64   | 95  | 55 | 68.33 | 67  | 15.4 | 7.8 | 4.6 | 1.4 | 0.6 | 23 | 15 | 20  | 128 | 231 | 63  | 68 | 150.4 | 6   | 37.5  | 440 | 13.3 | 41.2 | 16.4 | 261 | 12.3 | 0.7  | 142 | 4.6 | 101 | 9.9 | 4.5 | 139 | 10.7 | 10.7 | 0.7 | 0.8   |
| 64 F | 153.3 | 47.5 | 20.21 | 22.9 | 73   | 145 | 70 | 95    | 98  | 139  | 7.8 | 4.6 | 1.4 | 1   | 25 | 22 | 21  | 183 | 158 | 63  | 83 | 62.4  | 5.5 | 37    | 484 | 14.3 | 44.4 | 13.9 | 293 | 13.5 | 0.88 | 142 | 4.4 | 103 | 9.4 | 5.1 | 228 | 14.3 | 18.1 | 0.7 | 0.7   |
| 63 M | 166.5 | 62.8 | 22.65 | 20.7 | 86   | 120 | 72 | 88    | 62  | 12.3 | 7.5 | 4.6 | 1.6 | 0.7 | 17 | 13 | 15  | 229 | 200 | 91  | 51 | 130.8 | 5.3 | 65.2  | 440 | 14.3 | 43.3 | 19.2 | 431 | 10.7 | 0.88 | 142 | 4.3 | 103 | 9.2 | 6.4 | 112 | 12.3 | 11.1 | 1.1 | 0.7   |
| 60 F | 165.7 | 70.9 | 25.82 | 34.1 | 88   | 138 | 71 | 93.33 | 51  | 10   | 7.4 | 4.3 | 1.4 | 0.5 | 22 | 27 | 44  | 268 | 189 | 86  | 56 | 115.8 | 5.5 | 35.8  | 440 | 13.2 | 40.7 | 26.2 | 272 | 9.8  | 0.49 | 142 | 4.2 | 106 | 9   | 4.5 | 54  | 9.3  | 11.3 | 0.7 | 0.8   |
| 64 M | 159.3 | 67.8 | 26.72 | 26.4 | 86   | 156 | 90 | 112   | 59  | 13.1 | 7.4 | 4.6 | 1.6 | 1   | 28 | 28 | 44  | 169 | 247 | 118 | 66 | 157.4 | 5.5 | 83.9  | 524 | 16.4 | 48.7 | 20   | 289 | 12.8 | 0.74 | 141 | 3.9 | 103 | 9.2 | 4.6 | 56  | 15.9 | 19.1 | 0.8 | 0.7   |
| 66 F | 150.5 | 48.6 | 21.46 | 30.8 | 71   | 152 | 77 | 102   | 71  | 17.5 | 8.1 | 4.4 | 1.2 | 0.6 | 26 | 19 | 20  | 272 | 228 | 130 | 68 | 134   | 5.3 | 53.7  | 456 | 13.6 | 42.4 | 20.8 | 298 | 18   | 0.74 | 141 | 3.9 | 104 | 9.3 | 4.5 | 69  | 15.7 | 15.5 | 0.7 | 0.5   |
| 69 F | 149.3 | 48.1 | 21.58 | 26.7 | 70   | 117 | 58 | 77.67 | 65  | 11.3 | 7.6 | 4.6 | 1.5 | 0.9 | 26 | 23 | 17  | 224 | 188 | 49  | 67 | 111.2 | 5   | 36.1  | 431 | 13.7 | 41.7 | 18   | 272 | 14.9 | 0.66 | 143 | 4.6 | 105 | 9.4 | 3.8 | 115 | 12.2 | 16.8 | 0.8 | 0.7   |
| 66 F | 154.3 | 58.5 | 24.57 | 34.6 | 96   | 163 | 65 | 97.67 | 99  | 13.7 | 7.8 | 4.7 | 1.5 | 0.6 | 24 | 32 | 46  | 342 | 215 | 193 | 70 | 106.4 | 6.2 | 81.9  | 511 | 15.2 | 46.8 | 25.2 | 375 | 10.8 | 0.61 | 142 | 3.9 | 104 | 9.6 | 4.6 | 82  | 19.1 | 17.7 | 1.2 | 1.1   |
| 54 F | 160.5 | 66.3 | 25.74 | 41.6 | 86   | 115 | 67 | 83    | 72  | 15.9 | 7.9 | 4.6 | 1.4 | 0.7 | 29 | 47 | 98  | 261 | 245 | 262 | 51 | 141.6 | 5.3 | 60.8  | 531 | 15.7 | 46.6 | 24   | 250 | 9.3  | 0.46 | 144 | 3.9 | 101 | 9.8 | 4.8 | 54  | 15.4 | 15.9 | 0.5 | 0.7   |
| 67 F | 155.7 | 65.3 | 26.94 | 27.9 | 80   | 131 | 89 | 103   | 141 | 46.7 | 7.7 | 4   | 1.1 | 1.3 | 21 | 25 | 204 | 342 | 112 | 105 | 31 | 60    | 8.2 | 68.1  | 459 | 13.2 | 41.4 | 18.1 | 368 | 21.8 | 0.82 | 144 | 4.3 | 104 | 9.6 | 8.2 | 71  | 15.8 | 15.5 | 0.8 | 1.316 |
| 64 M | 159   | 51.7 | 20.45 | 15.4 | 74.5 | 139 | 75 | 96.33 | 49  | 22.1 | 6.9 | 4.2 | 1.6 | 0.8 | 29 | 18 | 124 | 124 | 207 | 153 | 76 | 100.4 | 4.9 | 51.6  | 399 | 14.3 | 42.8 | 22.1 | 348 | 19.1 | 0.71 | 144 | 3.9 | 104 | 8.9 | 6.2 | 66  | 14   | 13.9 | 0.7 | 0.7   |
| 80 M | 173.1 | 74.9 | 25    | 24.8 | 93   | 138 | 68 | 91.33 | 91  | 7.3  | 7.7 | 4.1 | 1.1 | 0.6 | 28 | 27 | 27  | 264 | 196 | 73  | 62 | 119.4 | 5.8 | 70.1  | 465 | 15.4 | 45.9 | 21.1 | 529 | 17.2 | 0.73 | 142 | 4.4 | 101 | 9.4 | 5.9 | 140 | 11.2 | 10.8 | 0.8 | 1.2   |
| 73 F | 151.4 | 51.5 | 22.47 | 32.3 | 87   | 138 | 65 | 89.33 | 64  | 46.5 | 7.3 | 4.4 | 1.5 | 0.8 | 19 | 15 | 16  | 173 | 215 | 57  | 69 | 134.6 | 5.4 | 65.2  | 481 | 14.7 | 44.9 | 23.2 | 261 | 15   | 0.54 | 144 | 4   | 105 | 9.6 | 4.2 | 51  | 18.6 | 16.9 | 0.8 | 1.2   |
| 69 M | 161.7 | 60.7 | 23.21 | 19.2 | 80   | 155 | 68 | 97    | 54  | 90.6 | 7.2 | 4.2 | 1.4 | 0.4 | 16 | 15 | 36  | 302 | 179 | 183 | 41 | 101.4 | 8.9 | 104.3 | 497 | 15   | 45.8 | 23.9 | 375 | 18   | 1.06 | 142 | 4.5 | 102 | 9.4 | 4.3 | 50  | 9.3  | 10   | 1.2 | 1.6   |
| 68 M | 168.1 | 69.1 | 24.45 | 22.8 | 88.5 | 128 | 78 | 94.67 | 47  | 27.1 | 7.4 | 4.3 | 1.4 | 1   | 29 | 39 | 16  | 276 | 212 | 125 | 50 | 137   | 5.4 | 70.5  | 578 | 17.2 | 50.5 | 21.3 | 303 | 14.2 | 1.14 | 143 | 4.3 | 104 | 9.6 | 6.3 | 75  | 15.7 | 16.2 | 0.8 | 0.7   |
| 60 F | 149.7 | 54.7 | 24.41 | 31.5 | 83   | 121 | 70 | 87    | 61  | 9    | 7.1 | 4   | 1.3 | 0.5 | 18 | 15 | 16  | 172 | 205 | 67  | 51 | 140.6 | 5.7 | 64.5  | 440 | 13   | 41.2 | 24.6 | 368 | 13.1 | 0.63 | 143 | 4.1 | 105 | 9.1 | 5.7 | 50  | 11.9 | 11.5 | 0.7 | 0.8   |
| 76 F | 150   | 60.3 | 26.8  | 35.2 | 76   | 129 | 75 | 93    | 58  | 28   | 8.1 | 4.4 | 1.2 | 0.6 | 23 | 14 | 16  | 380 | 222 | 94  | 76 | 127.2 | 5.4 | 50.4  | 506 | 13.5 | 43.3 | 30.9 | 308 | 12.9 | 0.66 | 140 | 4.9 | 103 | 9.6 | 5.7 | 101 | 14.6 | 15.8 | 0.7 | 0.8   |
| 77 M | 159.3 | 50.1 | 19.74 | 13.6 | 73   | 137 | 78 | 97.67 | 68  | 36.1 | 7   | 3.7 | 1.1 | 0.7 | 22 | 10 | 13  | 300 | 166 | 61  | 64 | 89.8  | 6.2 | 63.8  | 330 | 11.8 | 36.9 | 26.8 | 494 | 14.9 | 0.54 | 139 | 4.5 | 99  | 8.6 | 2.7 | 126 | 7.9  | 9.1  | 1.7 | 0.9   |
| 70 F | 148.3 | 57.2 | 26.01 | 35.1 | 81   | 156 | 92 | 113.3 | 91  | 4.5  | 7.5 | 4.6 | 1.6 | 0.7 | 24 | 26 | 43  | 188 | 195 | 172 | 63 | 97.6  | 5.2 | 46.2  | 439 | 14.4 | 43.5 | 26.1 | 324 | 10.7 | 0.8  | 142 | 4.3 | 101 | 9.2 | 6.2 | 63  | 12   | 12.6 | 0.5 | 1.3   |
| 72 M | 161.7 | 73.4 | 28.07 | 22.1 | 95   | 123 | 77 | 92.33 | 73  | 11.9 | 7.5 | 4.3 | 1.3 | 0.6 | 36 | 36 | 39  | 316 | 183 | 215 | 39 | 101   | 5.3 | 46.3  | 479 | 14.5 | 44.4 | 20.8 | 341 | 11.8 | 0.77 | 140 | 4.3 | 102 | 9.3 | 5.3 | 105 | 7.9  | 8.7  | 0.9 | 0.7   |
| 51 M | 169.9 | 86.8 | 30.07 | 38.1 | 105  | 142 | 88 | 106   | 57  | 5    | 7.4 | 4.5 | 1.6 | 0.7 | 54 | 48 | 51  | 272 | 219 | 196 | 45 | 134.8 | 4.9 | 43.1  | 463 | 15.7 | 45.5 | 19.6 | 335 | 10.9 | 0.87 | 141 | 4.5 | 105 | 9.5 | 4.6 | 54  | 14.9 | 13.1 | 0.5 | 0.7   |
| 29 M | 176.5 | 76.6 | 24.59 | 22.4 | 79.5 | 119 | 70 | 86.33 | 64  | 2    | 7.7 | 4.6 | 1.5 | 0.9 | 28 | 21 | 16  | 210 | 178 | 54  | 40 | 127.2 | 4.9 | 52.9  | 514 | 15.8 | 47.9 | 24.5 | 239 | 15.8 | 0.86 | 141 | 4.3 | 101 | 9.4 | 5.8 | 76  | 15.8 | 17   | 0.5 | 0.7   |
| 71 F | 146.2 | 40.3 | 18.85 | 26.9 | 68   | 168 | 92 | 117.3 | 67  | 54.4 | 7.9 | 4.5 | 1.3 | 0.6 | 30 | 23 | 22  | 200 | 215 | 140 | 68 | 119   | 5.4 | 62.8  | 455 | 12.9 | 41   | 32.5 | 268 | 14.2 | 0.59 | 139 | 4.1 | 100 | 9.7 | 4.9 | 99  | 10.8 | 10.8 | 0.7 | 0.7   |
| 62 M | 165.7 | 75.9 | 27.64 | 31.7 | 98   | 144 | 79 | 100.7 | 57  | 44.6 | 6.5 | 4.1 | 1.7 | 0.8 | 16 | 21 | 30  | 317 | 173 | 130 | 40 | 107   | 5.6 | 81.9  | 494 | 15.2 | 46.4 | 20.8 | 253 | 16.8 | 0.77 | 143 | 4.3 | 106 | 8.8 | 4.8 | 78  | 8    | 7.9  | 0.9 | 0.7   |
| 53 M | 174.5 | 89.2 | 29.29 | 28.4 | 100  | 137 | 75 | 95.67 | 58  | 5.2  | 7.4 | 4.6 | 1.6 | 0.7 | 54 | 98 | 94  | 281 | 185 | 241 | 33 | 103.8 | 5.8 | 73.4  | 550 | 17.1 | 50.8 | 15.1 | 228 | 10.9 | 0.98 | 140 | 4   | 102 | 9.1 | 3.7 | 202 | 15.9 | 15.9 | 0.7 | 0.7   |
| 71 F | 135.3 | 41.9 | 22.89 | 29.6 | 75   | 103 | 57 | 72.33 | 75  | 29.5 | 7.4 | 4.3 | 1.4 | 0.8 | 40 | 44 | 23  | 199 | 207 | 70  | 68 | 125   | 4.9 | 37.3  | 448 | 14.4 | 42.1 | 9.6  | 231 | 20.3 | 0.5  | 141 | 4.2 | 105 | 9.1 | 2.7 | 87  | 9.5  | 10.7 | 0.7 | 0.7   |
| 78 F | 149.2 | 52.3 | 23.49 | 27.9 | 89   | 107 | 53 | 71    | 53  | 43.3 | 6.9 | 4   | 1.4 | 0.5 | 39 | 20 | 32  | 169 | 218 | 103 | 64 | 133.4 | 5.4 | 74.9  | 454 | 13.4 | 40.7 | 19.5 | 298 | 21.6 | 0.48 | 144 | 4.8 | 108 | 8.6 | 4.4 | 52  | 9.7  | 10.1 | 1.3 | 1.3   |
| 71 F | 155.9 | 69.1 | 28.43 | 37.1 | 85.5 | 150 | 82 | 104.7 | 58  | 46.6 | 7.4 | 4.5 | 1.6 | 1.2 | 20 | 20 | 18  | 192 | 196 | 117 | 67 | 105.6 | 5.4 | 58.1  | 443 | 13.4 | 40.8 | 19.3 | 253 | 15.6 | 0.56 | 143 | 4.3 | 105 | 9.7 | 4.1 | 48  | 12.8 | 14   | 0.9 | 0.9   |
| 66 M | 168.5 | 65.8 | 23.18 | 24.5 | 80.5 | 151 | 86 | 107.7 | 54  | 26.2 | 7.7 | 4.7 | 1.5 | 1.4 | 24 | 17 | 32  | 203 | 233 | 101 | 68 | 144.8 | 6.7 | 64    | 482 | 15.1 | 46   | 20.9 | 361 | 20.7 | 0.88 | 141 | 4.7 | 105 | 9.6 | 7   | 49  | 12.9 | 10.8 | 0.9 | 0.8   |
| 48 M | 164.1 | 64   | 23.77 | 27.2 | 82.6 | 117 | 66 | 83    | 57  | 8.1  | 6.6 | 4.2 | 1.7 | 0.7 | 21 | 27 | 71  | 173 | 214 | 232 | 51 | 116.6 | 4.8 | 101.8 | 521 | 16.9 | 46.5 | 24.1 | 313 | 13.8 | 1.02 | 143 | 4.7 | 105 | 9   | 8.8 | 74  | 21.3 | 21.4 | 0.8 | 0.7   |
| 46 M | 163.6 | 68.3 | 25.52 | 23.2 | 85   | 129 | 84 | 99    | 90  | 2.6  | 7.6 | 4.7 | 1.7 | 0.7 | 28 | 50 | 111 | 242 | 220 | 330 | 60 | 94    | 5.1 | 71.1  | 492 | 14.7 | 43.1 | 18   | 280 | 13.4 | 0.87 | 144 | 4   | 106 | 9.3 | 5.1 | 63  | 14.4 | 13.2 | 0.5 | 0.5   |
| 75 M | 168.9 | 58.9 | 20.65 | 19.1 | 78   | 131 | 71 | 91    | 71  | 12.9 | 7.1 | 4.1 | 1.3 | 0.6 | 28 | 20 | 24  | 174 | 165 | 66  | 41 | 110.8 | 8   | 56.9  | 460 | 13.8 | 42.5 | 18.7 | 253 | 18.8 | 1.05 | 145 | 4.5 | 110 | 9.1 | 6.7 | 68  | 12.5 | 8.2  | 0.6 | 1.6   |
| 59 F | 155.4 | 64.5 | 26.71 | 41.9 | 92.5 | 157 | 99 | 118.3 | 75  | 10.3 | 7.8 | 4.5 | 1.3 | 1.3 | 27 | 27 | 118 | 316 | 248 | 101 | 87 | 140.8 | 4.8 | 54    | 469 | 14.2 | 42.9 | 36.4 | 206 |      |      |     |     |     |     |     |     |      |      |     |       |

|      |       |      |       |      |      |     |     |       |    |      |     |     |     |     |    |    |     |     |     |     |    |       |     |       |     |      |      |      |     |      |      |     |     |     |      |     |     |      |      |     |     |
|------|-------|------|-------|------|------|-----|-----|-------|----|------|-----|-----|-----|-----|----|----|-----|-----|-----|-----|----|-------|-----|-------|-----|------|------|------|-----|------|------|-----|-----|-----|------|-----|-----|------|------|-----|-----|
| 81 M | 162.6 | 71.9 | 27.19 | 24.4 | 101  | 134 | 78  | 96.67 | 95 | 27.6 | 7.6 | 4.3 | 1.3 | 1.1 | 27 | 24 | 48  | 158 | 214 | 99  | 74 | 120.2 | 4.9 | 59.4  | 458 | 14.7 | 44.1 | 13.8 | 247 | 18.5 | 0.6  | 143 | 4   | 103 | 9.3  | 7.8 | 48  | 9.3  | 8.9  | 0.6 | 1   |
| 52 M | 172.1 | 73.7 | 24.88 | 19.8 | 86   | 138 | 87  | 104   | 58 | 6.1  | 6.6 | 4.3 | 1.9 | 0.7 | 20 | 14 | 20  | 169 | 174 | 50  | 55 | 109   | 5.8 | 66    | 446 | 15.4 | 45.2 | 22.4 | 353 | 13.3 | 0.84 | 144 | 4.2 | 105 | 9.2  | 7   | 52  | 15.5 | 17.7 | 0.5 | 0.7 |
| 56 M | 168.1 | 66.5 | 23.53 | 21.3 | 83   | 143 | 95  | 111   | 58 | 22.6 | 7.5 | 4.4 | 1.4 | 1.9 | 24 | 18 | 139 | 314 | 202 | 52  | 76 | 115.6 | 5.1 | 44.1  | 494 | 14.4 | 43.4 | 24.4 | 208 | 15.2 | 0.78 | 143 | 4   | 105 | 8.8  | 4.6 | 91  | 13.4 | 11.5 | 0.6 | 0.6 |
| 65 M | 169.5 | 67.4 | 23.46 | 21.2 | 87   | 135 | 78  | 97    | 63 | 14.6 | 7.2 | 4.2 | 1.4 | 0.7 | 40 | 25 | 53  | 114 | 200 | 135 | 51 | 122   | 5.8 | 71    | 445 | 13.9 | 41.8 | 25.3 | 262 | 26.4 | 1.28 | 141 | 4.8 | 106 | 9.2  | 6.4 | 52  | 15.9 | 12.9 | 0.5 | 0.8 |
| 59 M | 162.9 | 63.7 | 24    | 24.9 | 81.5 | 137 | 86  | 103   | 99 | 3.2  | 8.3 | 4.7 | 1.3 | 0.9 | 31 | 39 | 26  | 235 | 231 | 81  | 61 | 153.8 | 5.7 | 74.9  | 537 | 16.7 | 49   | 17.3 | 279 | 15.9 | 0.8  | 141 | 4.1 | 100 | 9.9  | 6.9 | 97  | 16.5 | 16.9 | 0.5 | 0.6 |
| 67 M | 163.5 | 65.9 | 24.65 | 23.4 | 87   | 156 | 96  | 116   | 97 | 2    | 7.6 | 4.6 | 1.5 | 0.7 | 21 | 15 | 16  | 141 | 190 | 63  | 71 | 106.4 | 5.2 | 77.9  | 443 | 14.4 | 42.9 | 16.6 | 472 | 13.8 | 1.02 | 142 | 3.9 | 103 | 9.6  | 5.9 | 51  | 22   | 18.3 | 0.7 | 0.6 |
| 52 M | 168.9 | 67.8 | 23.77 | 20.7 | 84   | 121 | 81  | 94.33 | 62 | 5.6  | 7.2 | 4   | 1.3 | 0.5 | 21 | 14 | 22  | 147 | 161 | 183 | 44 | 80.4  | 5.4 | 86.9  | 501 | 15.4 | 47.7 | 25.2 | 339 | 10.8 | 0.74 | 143 | 4.6 | 105 | 9.1  | 6.6 | 50  | 12.5 | 11.7 | 0.6 | 0.7 |
| 51 M | 164   | 56.5 | 21.01 | 23.5 | 84   | 127 | 89  | 101.7 | 69 | 2    | 7.3 | 4.1 | 1.3 | 0.6 | 32 | 35 | 29  | 212 | 231 | 222 | 47 | 139.6 | 5.5 | 59.9  | 501 | 15.4 | 46.6 | 20.6 | 262 | 11   | 0.95 | 141 | 4.9 | 101 | 9.1  | 6.8 | 66  | 9.7  | 9.6  | 0.5 | 0.7 |
| 65 F | 156.2 | 58.3 | 23.89 | 34.3 | 85   | 139 | 77  | 97.67 | 66 | 18.8 | 7.6 | 4.1 | 1.2 | 0.7 | 28 | 44 | 40  | 180 | 194 | 114 | 50 | 121.2 | 4.7 | 46.1  | 436 | 14.6 | 40.4 | 11.4 | 274 | 18.7 | 0.51 | 144 | 4.5 | 108 | 9.2  | 4.7 | 91  | 13.4 | 13.6 | 0.7 | 0.7 |
| 67 F | 150.7 | 43.6 | 19.2  | 24.4 | 69.5 | 137 | 84  | 101.7 | 67 | 17.4 | 7   | 4.2 | 1.5 | 0.5 | 20 | 15 | 12  | 397 | 180 | 47  | 80 | 90.6  | 5.9 | 37.2  | 418 | 12.2 | 37.5 | 22   | 309 | 14.9 | 0.48 | 142 | 4.3 | 106 | 9    | 4.2 | 68  | 15.7 | 12   | 0.7 | 0.7 |
| 68 M | 174.1 | 67.9 | 22.4  | 20.3 | 84   | 149 | 92  | 111   | 70 | 10   | 7   | 4.1 | 1.4 | 0.8 | 23 | 20 | 24  | 215 | 179 | 165 | 41 | 105   | 5.7 | 51.8  | 414 | 13.7 | 41.3 | 13   | 226 | 21.4 | 1.02 | 141 | 4.4 | 105 | 8.9  | 7.9 | 93  | 11.9 | 10.6 | 0.8 | 0.7 |
| 63 F | 146.7 | 55.5 | 25.79 | 35.6 | 88   | 148 | 86  | 106.7 | 78 | 10.5 | 7.2 | 4.5 | 1.7 | 0.9 | 27 | 42 | 26  | 293 | 261 | 126 | 68 | 167.8 | 5.6 | 48.7  | 466 | 15.2 | 44.4 | 27.4 | 288 | 16.8 | 0.52 | 144 | 4.4 | 105 | 9.9  | 5   | 57  | 19.1 | 17.5 | 0.7 | 0.9 |
| 65 F | 149.7 | 60.5 | 27    | 38.1 | 91   | 137 | 74  | 95    | 69 | 5.5  | 7.8 | 4.5 | 1.4 | 0.9 | 41 | 60 | 44  | 515 | 252 | 124 | 72 | 155.2 | 5.7 | 54.4  | 464 | 14.6 | 43.9 | 16   | 274 | 12   | 0.49 | 142 | 4.2 | 104 | 9.4  | 4.8 | 101 | 21.9 | 20.3 | 0.8 | 0.7 |
| 57 M | 166.3 | 67.4 | 24.37 | 26.1 | 86   | 119 | 75  | 89.67 | 61 | 4.3  | 7.3 | 4.7 | 1.8 | 0.9 | 19 | 16 | 18  | 142 | 185 | 86  | 51 | 116.8 | 4.9 | 47.6  | 454 | 14.2 | 41.8 | 17.7 | 212 | 19.9 | 0.87 | 143 | 4.3 | 105 | 9.3  | 5.1 | 85  | 9.2  | 10   | 0.8 | 0.7 |
| 53 M | 160.4 | 70.6 | 27.44 | 25.6 | 87   | 165 | 100 | 121.7 | 53 | 6.4  | 7.5 | 4.6 | 1.6 | 1   | 26 | 33 | 40  | 273 | 209 | 128 | 40 | 143.4 | 5   | 67.8  | 437 | 14.8 | 43   | 22.7 | 253 | 13.7 | 0.84 | 142 | 4.3 | 103 | 9    | 7.5 | 62  | 13.6 | 10.1 | 0.7 | 0.7 |
| 61 F | 157   | 59.3 | 24.06 | 31   | 83   | 125 | 76  | 92.33 | 69 | 13.1 | 7.6 | 4.8 | 1.7 | 0.9 | 18 | 17 | 30  | 205 | 205 | 90  | 55 | 132   | 5.5 | 52    | 453 | 12.9 | 40.3 | 23.4 | 298 | 11.1 | 0.61 | 144 | 4   | 105 | 9.7  | 5.7 | 77  | 15.2 | 14.2 | 0.8 | 0.7 |
| 64 F | 137.3 | 39.8 | 21.11 | 25.9 | 67.5 | 116 | 66  | 82.67 | 54 | 32.4 | 7.2 | 4.4 | 1.5 | 0.9 | 19 | 9  | 15  | 239 | 236 | 107 | 55 | 159.6 | 5.2 | 47.9  | 371 | 11.3 | 34.8 | 22   | 313 | 14.6 | 0.49 | 144 | 4.1 | 108 | 9.2  | 4   | 68  | 14.3 | 9.5  | 0.8 | 1.1 |
| 50 M | 177.7 | 71.2 | 22.55 | 18.2 | 79   | 128 | 75  | 92.67 | 59 | 7.8  | 6.6 | 4.2 | 1.8 | 0.6 | 21 | 33 | 13  | 149 | 190 | 169 | 41 | 115.2 | 5.2 | 38.4  | 475 | 13.6 | 42.3 | 26.1 | 241 | 20.5 | 0.82 | 145 | 4   | 107 | 9    | 5.2 | 86  | 7.8  | 8.9  | 0.5 | 0.7 |
| 59 M | 167.7 | 73   | 25.96 | 26.2 | 89.5 | 132 | 91  | 104.7 | 68 | 4.9  | 7.4 | 4.5 | 1.6 | 0.5 | 51 | 57 | 175 | 200 | 230 | 466 | 62 | 74.8  | 5.4 | 112.6 | 456 | 15.1 | 45.8 | 29   | 313 | 14.3 | 0.88 | 141 | 4.2 | 102 | 9.8  | 8.8 | 73  | 12.4 | 12.4 | 0.7 | 0.7 |
| 72 M | 167.3 | 71.3 | 25.47 | 24.9 | 88.5 | 140 | 77  | 98    | 72 | 82.4 | 7.4 | 4.7 | 1.7 | 0.8 | 23 | 20 | 24  | 195 | 169 | 161 | 44 | 92.8  | 5.2 | 66.7  | 469 | 15.4 | 45.4 | 22.1 | 341 | 12.1 | 0.87 | 143 | 4.3 | 107 | 9.4  | 6.8 | 78  | 15.7 | 15   | 0.8 | 1.3 |
| 77 F | 144.4 | 61.5 | 29.49 | 35.4 | 94   | 119 | 66  | 83.67 | 57 | 20.7 | 6.9 | 4.4 | 1.8 | 0.5 | 21 | 17 | 17  | 183 | 195 | 102 | 48 | 126.6 | 5.7 | 47.4  | 375 | 11   | 33.4 | 22.5 | 204 | 22.8 | 0.55 | 141 | 4.4 | 104 | 9.3  | 5.1 | 60  | 7.1  | 7.1  | 0.9 | 0.9 |
| 83 F | 148.7 | 71.4 | 32.29 | 33.8 | 100  | 128 | 66  | 86.67 | 70 | 16   | 7.6 | 4.3 | 1.3 | 0.7 | 23 | 17 | 23  | 212 | 237 | 120 | 66 | 147   | 5.6 | 54.3  | 379 | 11.3 | 33.8 | 23.6 | 348 | 12.4 | 0.57 | 144 | 3.7 | 102 | 8.9  | 5.8 | 75  | 12   | 9    | 0.8 | 0.7 |
| 86 F | 131.3 | 35.1 | 20.36 | 23.1 | 64.5 | 162 | 80  | 107.3 | 86 | 29.2 | 7.5 | 4.2 | 1.3 | 0.4 | 36 | 14 | 16  | 239 | 190 | 33  | 60 | 123.4 | 5.5 | 64.3  | 305 | 10.9 | 30.3 | 26.9 | 361 | 15   | 0.56 | 137 | 4.3 | 102 | 9.5  | 6.9 | 115 | 9    | 12.1 | 0.9 | 0.8 |
| 63 F | 158.2 | 56.5 | 22.58 | 29.9 | 76   | 141 | 88  | 105.7 | 70 | 31.5 | 7.5 | 4.5 | 1.5 | 0.7 | 22 | 20 | 20  | 334 | 199 | 60  | 62 | 125   | 5.3 | 47.4  | 505 | 14.4 | 44.2 | 22.8 | 308 | 15.4 | 0.49 | 143 | 4.2 | 105 | 9.4  | 4.3 | 88  | 13.8 | 12.7 | 0.9 | 0.7 |
| 63 M | 168.5 | 74.2 | 26.13 | 27.3 | 86   | 123 | 75  | 91    | 72 | 4.3  | 7.3 | 4.1 | 1.3 | 0.4 | 47 | 36 | 37  | 192 | 185 | 120 | 68 | 93    | 5.4 | 55.5  | 481 | 14.8 | 46.1 | 18   | 318 | 21.2 | 0.88 | 141 | 4.6 | 102 | 9.2  | 6.5 | 33  | 8.7  | 8    | 0.7 | 0.7 |
| 60 F | 160.7 | 48.1 | 18.63 | 26   | 76.6 | 121 | 62  | 81.67 | 50 | 49.3 | 7.8 | 4.4 | 1.3 | 1   | 44 | 36 | 30  | 396 | 195 | 150 | 54 | 111   | 5.5 | 58.1  | 419 | 13.6 | 40.4 | 16.8 | 298 | 15.4 | 0.65 | 142 | 4.4 | 102 | 9.6  | 4   | 78  | 12.2 | 14.2 | 0.8 | 0.7 |
| 81 F | 154.9 | 56.9 | 23.71 | 16.1 | 74.5 | 109 | 55  | 73    | 60 | 162  | 7.6 | 4.2 | 1.2 | 0.7 | 35 | 16 | 63  | 146 | 173 | 41  | 89 | 75.8  | 5.4 | 57    | 394 | 12.3 | 37.5 | 23.2 | 272 | 18.6 | 1.1  | 140 | 4.6 | 104 | 9.3  | 7.4 | 145 | 7.4  | 7    | 0.7 | 0.7 |
| 60 F | 154.9 | 52.4 | 21.84 | 29.8 | 75   | 127 | 70  | 89    | 69 | 2.8  | 7.3 | 4.4 | 1.5 | 0.6 | 17 | 22 | 18  | 308 | 254 | 312 | 46 | 145.6 | 5.5 | 60.3  | 503 | 15.2 | 44.6 | 30.7 | 354 | 12.1 | 0.58 | 142 | 4.4 | 104 | 10.1 | 5   | 90  | 13.9 | 16.2 | 0.7 | 0.7 |
| 64 F | 161.3 | 51.8 | 19.91 | 26.4 | 71.5 | 108 | 54  | 72    | 63 | 31.3 | 7.8 | 4.3 | 1.2 | 0.8 | 20 | 11 | 26  | 219 | 266 | 118 | 73 | 169.4 | 5.3 | 66.1  | 416 | 12.5 | 39.3 | 31.1 | 298 | 12   | 0.62 | 141 | 4.3 | 103 | 9.3  | 4.8 | 108 | 8.7  | 8.9  | 0.7 | 0.7 |
| 53 M | 176.9 | 68.6 | 21.92 | 20.1 | 80   | 130 | 80  | 96.67 | 72 | 2    | 6.7 | 4.3 | 1.8 | 0.4 | 18 | 18 | 31  | 277 | 265 | 228 | 43 | 176.4 | 5.6 | 139.9 | 513 | 16.3 | 49.2 | 31.4 | 452 | 11.8 | 0.79 | 143 | 4.5 | 103 | 9.5  | 6.3 | 79  | 13.8 | 12   | 0.6 | 0.6 |
| 59 M | 170.4 | 67.4 | 23.21 | 19.7 | 80.5 | 152 | 90  | 110.7 | 45 | 5.9  | 7.2 | 4.4 | 1.6 | 0.8 | 19 | 19 | 26  | 176 | 171 | 88  | 46 | 107.4 | 5.2 | 65.8  | 478 | 15.4 | 45.9 | 20.8 | 261 | 14.1 | 0.97 | 143 | 4.3 | 104 | 8.9  | 7   | 74  | 17.4 | 15.2 | 0.8 | 0.7 |
| 57 M | 165.9 | 64.4 | 23.4  | 21.7 | 79.5 | 143 | 83  | 103   | 67 | 10.4 | 7.6 | 4.7 | 1.6 | 0.8 | 22 | 17 | 38  | 248 | 212 | 66  | 70 | 128.8 | 5.6 | 47.3  | 504 | 16.3 | 48.5 | 22.7 | 293 | 15.7 | 0.96 | 144 | 4.8 | 104 | 9.5  | 5.1 | 56  | 15   | 13   | 0.7 | 0.8 |
| 66 M | 174.1 | 80.6 | 26.59 | 25.4 | 92.5 | 122 | 77  | 92    | 46 | 5.2  | 7.3 | 4.3 | 1.4 | 0.8 | 25 | 23 | 19  | 207 | 200 | 61  | 50 | 137.8 | 5.8 | 64.2  | 456 | 15.1 | 44.5 | 25.5 | 361 | 13.4 | 1.15 | 144 | 4.1 | 105 | 9.3  | 8.1 | 89  | 11.4 | 12.1 | 0.7 | 0.8 |
| 64 F | 158.9 | 58   | 22.97 | 29.9 | 83.5 | 195 | 113 | 140.3 | 82 | 5.6  | 8.1 | 4.9 | 1.5 | 0.8 | 18 | 20 | 24  | 315 | 308 | 158 | 68 | 208.4 | 5.7 | 45.5  | 491 | 15.1 | 44.1 | 26.8 | 313 | 11.8 | 0.51 | 144 | 3.4 | 103 | 9.6  | 3.6 | 67  | 9.6  | 8.3  | 1.1 | 1.3 |
| 64 M | 170.5 | 74.4 | 25.59 | 22.8 | 95   | 157 | 87  | 110.3 | 52 | 22.9 | 7.4 | 4.3 | 1.4 | 0.9 | 20 | 13 | 41  | 220 | 222 | 64  | 63 | 146.2 | 5   | 60.2  | 484 | 15.5 | 45.4 | 23.9 | 354 | 11.6 | 1.11 | 142 | 4.3 | 103 | 9.4  | 6.1 | 86  | 10.7 | 11.1 | 1.2 | 1.1 |
| 67 F | 156.1 | 69.9 | 28.69 | 40.8 | 92.5 | 135 | 72  | 93    | 70 | 14.3 | 7.5 | 4.3 | 1.3 | 0.7 | 25 | 20 | 19  | 180 | 222 | 159 | 57 | 133.2 | 4.9 | 48.1  | 456 | 13.5 | 40.7 | 21.4 | 318 | 10.9 | 0.69 | 143 | 4.  |     |      |     |     |      |      |     |     |

|      |       |      |       |      |      |     |     |       |    |      |     |     |     |     |     |    |     |     |     |     |    |       |     |      |     |      |      |      |     |      |      |     |     |     |     |     |     |      |      |     |     |
|------|-------|------|-------|------|------|-----|-----|-------|----|------|-----|-----|-----|-----|-----|----|-----|-----|-----|-----|----|-------|-----|------|-----|------|------|------|-----|------|------|-----|-----|-----|-----|-----|-----|------|------|-----|-----|
| 77 M | 160.1 | 58   | 22.63 | 18.1 | 72.5 | 136 | 71  | 92.67 | 54 | 59   | 7.2 | 4.3 | 1.5 | 1   | 20  | 17 | 26  | 176 | 220 | 103 | 90 | 109.4 | 5.3 | 47.2 | 475 | 15.1 | 45   | 16.6 | 231 | 14.9 | 0.98 | 140 | 4.4 | 102 | 8.9 | 7.2 | 89  | 12.7 | 11.5 | 0.7 | 0.6 |
| 63 M | 167.8 | 53.5 | 19    | 14.4 | 70.5 | 145 | 83  | 103.7 | 66 | 23.4 | 7.5 | 4.5 | 1.5 | 0.8 | 20  | 30 | 16  | 245 | 166 | 68  | 71 | 81.4  | 5.8 | 74.5 | 446 | 14.3 | 42.5 | 17.3 | 272 | 21.2 | 0.81 | 141 | 4.1 | 103 | 8.9 | 3.6 | 57  | 9    | 9.8  | 0.5 | 0.6 |
| 59 M | 170.1 | 77.1 | 26.65 | 25   | 91   | 149 | 84  | 105.7 | 60 | 3.6  | 7.8 | 4.4 | 1.3 | 0.5 | 16  | 20 | 44  | 215 | 260 | 327 | 53 | 141.6 | 6.6 | 85.7 | 490 | 13.9 | 42.7 | 26.2 | 340 | 15.5 | 0.69 | 141 | 4.7 | 103 | 9.8 | 8.7 | 42  | 9.8  | 11.2 | 0.8 | 0.9 |
| 50 M | 177.3 | 89.6 | 28.5  | 27.8 | 94   | 113 | 70  | 84.33 | 60 | 2    | 6.9 | 4.3 | 1.7 | 1.2 | 18  | 32 | 88  | 190 | 213 | 381 | 40 | 96.8  | 4.5 | 50.7 | 468 | 14.7 | 41.6 | 26.2 | 246 | 14   | 0.78 | 143 | 3.8 | 105 | 9.1 | 5.9 | 38  | 13.7 | 13.3 | 0.7 | 0.8 |
| 52 M | 162.9 | 71.6 | 26.98 | 30.7 | 90   | 165 | 109 | 127.7 | 64 | 4    | 7.2 | 4.4 | 1.5 | 0.8 | 14  | 19 | 32  | 215 | 216 | 112 | 58 | 135.6 | 5.3 | 58.3 | 536 | 15.5 | 46.2 | 24.8 | 257 | 13.5 | 0.95 | 142 | 4   | 106 | 9.2 | 6.3 | 101 | 10.8 | 11.6 | 0.7 | 0.9 |
| 58 M | 161.4 | 60   | 23.03 | 17.4 | 75   | 129 | 79  | 95.67 | 53 | 9.9  | 6.7 | 4.1 | 1.6 | 0.7 | 16  | 13 | 23  | 217 | 192 | 111 | 52 | 117.8 | 6.4 | 64.3 | 485 | 15.9 | 47.5 | 23.3 | 282 | 11.3 | 0.7  | 144 | 4.2 | 105 | 8.9 | 5.6 | 57  | 10.1 | 12.5 | 0.9 | 0.8 |
| 57 F | 157.9 | 52.7 | 21.14 | 25.6 | 79.5 | 106 | 55  | 72    | 59 | 6.6  | 7.2 | 4.4 | 1.6 | 0.7 | 24  | 25 | 15  | 146 | 221 | 88  | 77 | 126.4 | 5.3 | 37.9 | 437 | 13.4 | 40.3 | 14.4 | 300 | 15.5 | 0.6  | 141 | 4.3 | 106 | 9.5 | 4.1 | 113 | 8.9  | 7.8  | 0.5 | 0.7 |
| 57 M | 167.7 | 69.4 | 24.68 | 25.6 | 82   | 138 | 87  | 104   | 66 | 4.5  | 7.5 | 4.6 | 1.6 | 1.1 | 22  | 17 | 22  | 154 | 205 | 74  | 74 | 116.2 | 5   | 50.6 | 453 | 14.5 | 43.8 | 21   | 286 | 15.9 | 0.8  | 142 | 4.1 | 105 | 9.6 | 7.1 | 61  | 16.8 | 16.2 | 0.7 | 0.7 |
| 55 F | 156.5 | 52.8 | 21.56 | 28.5 | 75.5 | 159 | 98  | 118.3 | 62 | 22.1 | 8   | 4.6 | 1.4 | 1.3 | 16  | 14 | 23  | 259 | 247 | 105 | 59 | 167   | 5.7 | 62.8 | 510 | 14.8 | 43.7 | 27.5 | 291 | 8.4  | 0.51 | 143 | 3.9 | 103 | 9.7 | 5.2 | 70  | 16.7 | 18.5 | 0.8 | 0.7 |
| 68 M | 160.9 | 62   | 23.95 | 19.3 | 82   | 133 | 79  | 97    | 63 | 10.9 | 7.1 | 4.3 | 1.5 | 0.9 | 17  | 18 | 25  | 205 | 183 | 64  | 56 | 114.2 | 5   | 61.9 | 505 | 15.4 | 47.3 | 22.3 | 218 | 17   | 0.9  | 143 | 4.3 | 106 | 9   | 3.8 | 73  | 9.3  | 10   | 0.8 | 1.1 |
| 68 F | 150.9 | 45.9 | 20.16 | 20   | 64   | 156 | 93  | 114   | 71 | 99.7 | 7.4 | 4.6 | 1.6 | 0.9 | 32  | 22 | 18  | 384 | 208 | 61  | 68 | 127.8 | 6.2 | 46.2 | 445 | 12.2 | 38   | 20.5 | 257 | 13   | 0.7  | 143 | 3.6 | 103 | 9.4 | 6.1 | 73  | 13.2 | 12.7 | 0.9 | 1.1 |
| 57 F | 153.9 | 46.7 | 19.72 | 23.6 | 72   | 113 | 61  | 78.33 | 76 | 8.1  | 7.7 | 4.6 | 1.5 | 0.7 | 23  | 15 | 13  | 145 | 190 | 75  | 64 | 111   | 4.9 | 51.7 | 413 | 12.5 | 38.2 | 20.7 | 347 | 20.7 | 0.52 | 143 | 4.5 | 107 | 9.5 | 3.8 | 68  | 15.3 | 13.8 | 0.9 | 1.1 |
| 63 F | 150.6 | 48.9 | 21.56 | 29.7 | 79   | 129 | 87  | 101   | 69 | 20.5 | 6.9 | 4.4 | 1.8 | 0.7 | 20  | 15 | 23  | 199 | 258 | 162 | 96 | 129.6 | 5.4 | 54   | 464 | 13.1 | 40.9 | 23.2 | 282 | 12.6 | 0.65 | 141 | 4.1 | 105 | 9   | 4.3 | 106 | 10.6 | 11.1 | 0.7 | 0.8 |
| 59 M | 156.7 | 69.3 | 28.22 | 28   | 90.5 | 177 | 97  | 123.7 | 72 | 24.2 | 7.4 | 4.4 | 1.5 | 1.2 | 114 | 90 | 60  | 215 | 180 | 100 | 52 | 108   | 5.7 | 76.5 | 512 | 15.3 | 45.5 | 22.2 | 296 | 14.5 | 0.87 | 142 | 4.4 | 105 | 9.3 | 7.1 | 62  | 15.1 | 14.2 | 2.8 | 0.8 |
| 54 F | 149.3 | 51.5 | 23.1  | 28.7 | 77.5 | 100 | 57  | 71.33 | 69 | 17   | 7.5 | 4.6 | 1.6 | 1   | 26  | 18 | 20  | 219 | 252 | 93  | 68 | 165.4 | 5   | 49.6 | 442 | 13.6 | 41.2 | 20.8 | 184 | 12.3 | 0.74 | 144 | 4   | 104 | 9.7 | 5.4 | 128 | 14.1 | 15.3 | 0.8 | 0.5 |
| 55 M | 166.7 | 70.3 | 25.3  | 18   | 83   | 142 | 85  | 104   | 55 | 3.9  | 7.6 | 4.8 | 1.7 | 1   | 26  | 34 | 23  | 153 | 207 | 60  | 56 | 139   | 5.4 | 73.1 | 447 | 14.6 | 43   | 25.9 | 247 | 19.5 | 0.96 | 142 | 4.2 | 103 | 9.7 | 6.3 | 129 | 10.8 | 10.6 | 0.8 | 0.9 |
| 52 F | 157.2 | 42.8 | 17.32 | 18   | 58.5 | 101 | 65  | 77    | 67 | 5.4  | 7.3 | 4.3 | 1.4 | 0.8 | 19  | 14 | 14  | 185 | 212 | 53  | 62 | 119.4 | 4.9 | 45.2 | 458 | 12.6 | 39.1 | 20   | 257 | 11   | 0.68 | 144 | 4.5 | 107 | 9.5 | 3.6 | 57  | 14.1 | 13.8 | 0.5 | 0.5 |
| 57 M | 170.7 | 67.5 | 23.17 | 22.5 | 84.5 | 132 | 83  | 99.33 | 61 | 5.9  | 7.2 | 4.5 | 1.7 | 1.1 | 31  | 34 | 80  | 254 | 218 | 188 | 53 | 127.4 | 5.6 | 68.8 | 549 | 16.2 | 49.1 | 21.1 | 238 | 16.9 | 1.01 | 144 | 4.7 | 106 | 9.5 | 8.5 | 63  | 12   | 11.2 | 0.5 | 0.6 |
| 53 M | 165.1 | 81.6 | 29.94 | 25.2 | 89.5 | 132 | 82  | 98.67 | 63 | 2.7  | 7.8 | 4.5 | 1.4 | 1   | 51  | 86 | 205 | 187 | 204 | 200 | 56 | 108   | 5.1 | 60.7 | 472 | 15.1 | 44.1 | 23.3 | 233 | 13.6 | 0.97 | 141 | 3.8 | 104 | 9.3 | 6.1 | 43  | 13.4 | 12.5 | 0.7 | 0.8 |
| 58 M | 165.9 | 78.7 | 28.59 | 24.7 | 91   | 141 | 89  | 106.3 | 61 | 12.9 | 7.6 | 4.6 | 1.5 | 0.4 | 51  | 62 | 164 | 144 | 186 | 219 | 43 | 99.2  | 5.1 | 40.3 | 505 | 15.8 | 47   | 15.3 | 265 | 17.1 | 0.78 | 141 | 4.1 | 103 | 9.3 | 4.4 | 69  | 13.6 | 14.1 | 0.6 | 0.6 |
| 70 M | 164.5 | 63.5 | 23.47 | 22.3 | 80   | 162 | 71  | 101.3 | 58 | 26   | 7.5 | 4.1 | 1.2 | 1   | 22  | 15 | 26  | 208 | 163 | 55  | 67 | 85    | 5.2 | 46.9 | 450 | 13.9 | 42.3 | 17.5 | 233 | 12.6 | 0.83 | 140 | 4.9 | 104 | 8.7 | 5.2 | 59  | 7.8  | 7.9  | 0.6 | 0.7 |
| 47 M | 180.5 | 73.1 | 22.44 | 25.6 | 84.5 | 132 | 90  | 104   | 74 | 2    | 8.2 | 4.8 | 1.4 | 1.3 | 40  | 57 | 160 | 181 | 218 | 228 | 55 | 117.4 | 4.8 | 62   | 557 | 15.5 | 46.9 | 24.2 | 197 | 16.8 | 0.8  | 142 | 4   | 104 | 9.7 | 6.8 | 46  | 10.7 | 13.8 | 0.7 | 0.5 |
| 67 M | 167.9 | 67.9 | 24.09 | 20.9 | 87   | 128 | 82  | 97.33 | 56 | 7.9  | 7.1 | 4.3 | 1.5 | 1.5 | 31  | 31 | 47  | 172 | 178 | 92  | 46 | 113.6 | 5.3 | 64   | 479 | 16   | 47   | 23.7 | 250 | 15.1 | 0.81 | 140 | 4.2 | 105 | 9.2 | 6.8 | 60  | 16.7 | 14.5 | 0.8 | 0.8 |
| 68 F | 155.2 | 53.9 | 22.38 | 28.7 | 77   | 183 | 112 | 135.7 | 67 | 32.1 | 7.5 | 4.6 | 1.6 | 0.8 | 26  | 40 | 96  | 235 | 199 | 124 | 74 | 100.2 | 5.1 | 46.1 | 424 | 13   | 39.6 | 17   | 328 | 15.6 | 0.76 | 143 | 4.2 | 104 | 9.3 | 5.8 | 60  | 13   | 11.3 | 1.1 | 1.1 |
| 60 F | 160.1 | 45.7 | 17.83 | 18.1 | 66   | 139 | 79  | 99    | 65 | 25.6 | 7   | 4.3 | 1.6 | 1.3 | 23  | 13 | 13  | 279 | 235 | 84  | 92 | 126.2 | 5   | 49.3 | 437 | 13   | 40.7 | 20.5 | 269 | 15   | 0.8  | 142 | 3.9 | 100 | 9.6 | 5.3 | 128 | 10.2 | 13   | 0.7 | 0.5 |
| 65 F | 147.1 | 47.4 | 21.91 | 29.7 | 77.5 | 133 | 68  | 89.67 | 69 | 3.3  | 7.8 | 4.7 | 1.5 | 0.7 | 22  | 17 | 12  | 212 | 205 | 78  | 89 | 100.4 | 5   | 32.3 | 359 | 11.6 | 35.6 | 17.8 | 291 | 15.9 | 0.66 | 143 | 4.3 | 105 | 9.7 | 3.5 | 102 | 10.5 | 11.2 | 0.8 | 0.9 |
| 65 M | 163.3 | 65.8 | 24.67 | 24.4 | 89   | 139 | 92  | 107.7 | 80 | 2    | 7.2 | 3.9 | 1.2 | 0.8 | 19  | 16 | 27  | 197 | 192 | 142 | 42 | 121.6 | 5.3 | 97.6 | 437 | 14   | 42.4 | 35   | 322 | 16.9 | 0.79 | 140 | 4.8 | 104 | 9.1 | 7.6 | 123 | 10.4 | 10.9 | 0.8 | 0.9 |
| 66 M | 164.1 | 67   | 24.88 | 24.2 | 84.5 | 145 | 91  | 109   | 73 | 96.7 | 7.5 | 4.5 | 1.5 | 0.9 | 20  | 23 | 27  | 242 | 200 | 133 | 58 | 115.4 | 5.1 | 52.6 | 515 | 16.6 | 48.3 | 17.3 | 311 | 17.3 | 0.92 | 141 | 4.1 | 100 | 9.5 | 5.9 | 61  | 7.5  | 7.5  | 1.1 | 0.9 |
| 65 F | 150.9 | 50.8 | 22.31 | 29.7 | 80   | 123 | 69  | 87    | 57 | 21.9 | 7.1 | 4.5 | 1.7 | 0.7 | 23  | 18 | 13  | 152 | 228 | 57  | 74 | 142.6 | 5.2 | 35   | 433 | 13.5 | 40.2 | 20.7 | 261 | 14.2 | 0.63 | 144 | 4.1 | 105 | 9.1 | 5.2 | 80  | 10.8 | 11.3 | 0.7 | 0.9 |
| 60 M | 167.7 | 63   | 22.4  | 25.2 | 76.5 | 109 | 66  | 80.33 | 56 | 8.3  | 6.9 | 4.3 | 1.7 | 0.7 | 23  | 15 | 16  | 229 | 181 | 58  | 68 | 101.4 | 5.7 | 46.8 | 422 | 12.6 | 39.3 | 21.5 | 250 | 14   | 0.76 | 141 | 4.5 | 102 | 9.6 | 5.1 | 47  | 11.6 | 11.4 | 0.8 | 0.8 |
| 66 F | 151.3 | 52   | 22.72 | 27.5 | 73   | 147 | 80  | 102.3 | 65 | 10   | 7.4 | 4.5 | 1.6 | 0.8 | 15  | 9  | 13  | 327 | 208 | 50  | 64 | 134   | 5.4 | 44.2 | 401 | 12   | 37   | 23.2 | 300 | 13.7 | 0.5  | 142 | 4.1 | 106 | 9   | 3.9 | 52  | 15   | 13.2 | 0.6 | 0.7 |
| 58 M | 169.9 | 62.7 | 21.72 | 14.6 | 74   | 111 | 69  | 83    | 59 | 7.5  | 7   | 4.5 | 1.8 | 0.8 | 17  | 15 | 22  | 172 | 185 | 79  | 78 | 91.2  | 6.2 | 54.3 | 477 | 14.5 | 42.3 | 18.8 | 286 | 14.4 | 0.88 | 143 | 4   | 104 | 9.2 | 5.6 | 85  | 11.9 | 17.4 | 0.7 | 0.7 |
| 54 F | 157.4 | 72.2 | 29.14 | 41.3 | 93.5 | 116 | 76  | 89.33 | 61 | 28.5 | 6.6 | 4.2 | 1.8 | 0.5 | 18  | 19 | 18  | 193 | 206 | 50  | 56 | 140   | 5.7 | 61   | 493 | 14.5 | 43.5 | 23.1 | 375 | 22.1 | 0.72 | 144 | 4.3 | 106 | 9.5 | 5.6 | 51  | 19   | 16.4 | 0.5 | 0.5 |
| 65 F | 149.6 | 46.4 | 20.73 | 25.5 | 69.5 | 95  | 46  | 62.33 | 59 | 17.2 | 7.4 | 4.3 | 1.4 | 0.7 | 29  | 35 | 35  | 221 | 216 | 77  | 82 | 118.6 | 5.1 | 43.1 | 407 | 12.6 | 38.8 | 20   | 254 | 14.5 | 0.65 | 141 | 4.3 | 104 | 9.3 | 5   | 90  | 11.6 | 10.7 | 0.7 | 0.7 |
| 63 M | 160.4 | 51.6 | 20.06 | 17.2 | 76   | 121 | 77  | 91.67 | 82 | 2.8  | 7.5 | 4.5 | 1.5 | 0.9 | 27  | 36 | 40  | 166 | 247 | 143 | 69 | 149.4 | 5.3 | 87.5 | 479 | 14.5 | 43.7 | 22   | 213 | 11.3 | 0.84 | 142 | 4.3 | 102 | 9.3 | 6   | 103 | 15.5 | 17.7 | 0.7 | 0.7 |
| 55 F | 154.1 | 54.5 | 22.95 | 29.2 | 72.5 | 106 | 65  | 78.67 | 64 | 24.2 | 7.2 | 4.1 | 1.3 | 0.8 | 20  | 18 | 16  | 289 | 160 | 71  | 61 | 84.8  | 5.1 | 43.4 | 450 | 13.4 | 39.6 | 22.4 | 209 | 12   | 0.49 | 143 | 4   | 103 | 9.1 |     |     |      |      |     |     |

|      |       |      |       |      |       |     |    |       |    |      |     |     |     |     |     |     |     |     |     |     |     |       |     |      |     |      |      |      |     |      |      |     |     |     |      |     |     |      |      |     |     |
|------|-------|------|-------|------|-------|-----|----|-------|----|------|-----|-----|-----|-----|-----|-----|-----|-----|-----|-----|-----|-------|-----|------|-----|------|------|------|-----|------|------|-----|-----|-----|------|-----|-----|------|------|-----|-----|
| 67 M | 167.4 | 68.2 | 24.34 | 21.2 | 75.5  | 127 | 82 | 97    | 73 | 4.8  | 7.8 | 4.4 | 1.3 | 0.9 | 24  | 31  | 33  | 249 | 213 | 172 | 48  | 130.6 | 5.2 | 76.1 | 483 | 15   | 45.2 | 22   | 265 | 14.2 | 0.8  | 141 | 3.8 | 100 | 9.6  | 4.9 | 86  | 9.3  | 10.1 | 0.8 | 0.8 |
| 64 F | 154.5 | 54.9 | 23    | 31.1 | 84    | 119 | 68 | 85    | 69 | 15.1 | 7.6 | 4.6 | 1.5 | 0.9 | 28  | 31  | 103 | 220 | 210 | 141 | 59  | 122.8 | 5.2 | 49.5 | 421 | 13   | 37.4 | 18   | 198 | 14.3 | 0.71 | 142 | 4.4 | 106 | 9.6  | 5.2 | 38  | 14.5 | 18.2 | 0.7 | 0.7 |
| 67 F | 145.3 | 53.1 | 25.15 | 31.5 | 84.5  | 144 | 81 | 102   | 59 | 30.7 | 7.2 | 4.1 | 1.3 | 0.5 | 25  | 23  | 26  | 262 | 214 | 98  | 53  | 141.4 | 5.1 | 32.9 | 411 | 12.3 | 37.6 | 18.1 | 247 | 9.9  | 0.59 | 143 | 4   | 106 | 9.2  | 5.1 | 73  | 10   | 11.4 | 0.7 | 0.8 |
| 61 F | 151.2 | 56.8 | 24.85 | 30.8 | 80    | 136 | 85 | 102   | 71 | 6.6  | 7.3 | 4.5 | 1.6 | 0.7 | 38  | 31  | 20  | 210 | 229 | 136 | 51  | 150.8 | 4.8 | 59.1 | 474 | 14.3 | 43.4 | 27.1 | 306 | 13.2 | 0.49 | 142 | 4.4 | 104 | 9.4  | 4.8 | 64  | 8.6  | 10.6 | 1.1 | 1   |
| 60 M | 167.7 | 68   | 24.18 | 24.8 | 81    | 138 | 82 | 100.7 | 59 | 5.4  | 7.6 | 4.5 | 1.5 | 0.6 | 22  | 23  | 54  | 169 | 160 | 122 | 49  | 86.6  | 5   | 52.4 | 462 | 15.1 | 44.1 | 20.8 | 213 | 13.6 | 0.75 | 141 | 4   | 104 | 9.2  | 7.6 | 64  | 10.9 | 10   | 0.9 | 0.7 |
| 61 M | 162.5 | 64.3 | 24.35 | 24.8 | 82    | 155 | 92 | 113   | 61 | 14   | 8.1 | 4.7 | 1.4 | 0.8 | 35  | 28  | 51  | 228 | 278 | 88  | 65  | 195.4 | 4.9 | 75.2 | 462 | 14.9 | 43.7 | 19.9 | 211 | 14.5 | 0.91 | 142 | 3.9 | 102 | 9.7  | 3.9 | 89  | 11.6 | 9    | 1.8 | 1.3 |
| 50 M | 170.5 | 80.6 | 27.73 | 27   | 91.5  | 137 | 77 | 97    | 59 | 5.2  | 7.7 | 4.5 | 1.4 | 0.9 | 18  | 17  | 28  | 206 | 198 | 273 | 40  | 103.4 | 5.2 | 54.2 | 539 | 14.3 | 44.5 | 21   | 353 | 14   | 0.75 | 142 | 4.3 | 102 | 9.6  | 5.6 | 40  | 9.8  | 10.8 | 0.7 | 0.5 |
| 64 F | 148.1 | 58.1 | 26.49 | 33   | 85.5  | 149 | 86 | 107   | 77 | 9.7  | 7.3 | 5   | 2.2 | 0.7 | 22  | 22  | 13  | 231 | 268 | 85  | 87  | 164   | 5.5 | 62.6 | 447 | 13.5 | 40.8 | 30.5 | 316 | 13.4 | 0.56 | 143 | 3.8 | 104 | 9.3  | 3.9 | 40  | 9    | 9.4  | 0.7 | 0.7 |
| 50 M | 167.3 | 60.3 | 21.54 | 24.5 | 80    | 132 | 83 | 99.33 | 45 | 18.1 | 7   | 4.3 | 1.6 | 0.7 | 24  | 19  | 43  | 225 | 178 | 60  | 67  | 99    | 5.3 | 58.1 | 484 | 15.3 | 46   | 18.9 | 220 | 16.3 | 0.69 | 142 | 4.2 | 104 | 9.5  | 5.6 | 53  | 11.9 | 11.9 | 0.5 | 0.7 |
| 56 F | 156.1 | 44   | 18.06 | 19.1 | 64    | 150 | 97 | 114.7 | 69 | 11.5 | 7.3 | 4.4 | 1.5 | 1.2 | 15  | 10  | 13  | 303 | 241 | 42  | 113 | 119.6 | 4.9 | 33   | 417 | 13.5 | 42.6 | 19.8 | 238 | 11.7 | 0.52 | 145 | 3.6 | 104 | 9.7  | 4.7 | 92  | 9.1  | 10.2 | 0.8 | 0.7 |
| 52 M | 171.6 | 78   | 26.49 | 26   | 88    | 138 | 87 | 104   | 83 | 13.1 | 7.3 | 4.5 | 1.6 | 0.8 | 60  | 72  | 269 | 316 | 188 | 375 | 44  | 69    | 5.1 | 46.6 | 489 | 14.8 | 43.8 | 17.5 | 257 | 13.6 | 0.74 | 140 | 4.2 | 104 | 9.3  | 6.1 | 96  | 10.2 | 12.6 | 0.8 | 0.9 |
| 53 M | 164.6 | 73   | 26.94 | 24.5 | 86    | 126 | 86 | 99.33 | 58 | 2    | 7   | 4.2 | 1.5 | 1.2 | 22  | 19  | 138 | 205 | 153 | 109 | 58  | 73.2  | 5   | 69   | 478 | 15.4 | 45.9 | 19.5 | 322 | 11.1 | 0.71 | 140 | 4.1 | 101 | 9.2  | 5.1 | 53  | 13.6 | 11.7 | 0.8 | 0.9 |
| 63 F | 147.9 | 48   | 21.94 | 29   | 80    | 109 | 71 | 83.67 | 61 | 17   | 7.8 | 4.9 | 1.7 | 1   | 24  | 27  | 25  | 202 | 118 | 147 | 38  | 50.6  | 5.6 | 85.3 | 533 | 14.3 | 45.1 | 24.7 | 273 | 19.8 | 0.71 | 143 | 4.2 | 105 | 9.7  | 6.3 | 78  | 12.3 | 10.5 | 0.5 | 0.7 |
| 63 F | 156.2 | 48   | 19.67 | 23.3 | 69    | 122 | 79 | 93.33 | 73 | 28.1 | 7.4 | 4.8 | 1.8 | 1.2 | 26  | 16  | 21  | 212 | 255 | 57  | 113 | 130.6 | 5.2 | 49.6 | 483 | 14.8 | 45.3 | 15.9 | 306 | 13.9 | 0.73 | 142 | 4.5 | 101 | 9.5  | 2.9 | 94  | 12   | 14.9 | 0.7 | 0.8 |
| 62 F | 166.6 | 64.1 | 23.09 | 31.3 | 89    | 111 | 63 | 79    | 63 | 24.9 | 7.1 | 4.2 | 1.4 | 0.6 | 16  | 15  | 15  | 194 | 201 | 80  | 58  | 127   | 5.6 | 56.4 | 454 | 13.7 | 43.3 | 19.8 | 353 | 10.8 | 0.51 | 145 | 3.8 | 107 | 9.5  | 4.9 | 57  | 9.3  | 8.2  | 0.8 | 0.8 |
| 69 M | 164.3 | 65.3 | 24.19 | 29.6 | 87.5  | 121 | 77 | 91.67 | 72 | 10.6 | 7.5 | 4.4 | 1.4 | 0.9 | 32  | 22  | 95  | 155 | 206 | 70  | 95  | 97    | 5.4 | 47.1 | 475 | 14.4 | 44.1 | 18.2 | 265 | 15   | 0.85 | 140 | 4.4 | 100 | 9.5  | 7.9 | 100 | 14.2 | 13.8 | 0.7 | 0.7 |
| 65 M | 160.3 | 63.4 | 24.67 | 26.3 | 84    | 121 | 72 | 88.33 | 90 | 29.8 | 6.1 | 4.2 | 2.2 | 0.7 | 16  | 14  | 17  | 138 | 198 | 57  | 56  | 130.6 | 5.2 | 95.7 | 483 | 14.7 | 43.6 | 18.5 | 311 | 13.3 | 0.8  | 145 | 4.1 | 108 | 9.1  | 5.5 | 81  | 10.9 | 13.1 | 0.5 | 0.7 |
| 58 M | 164.5 | 72   | 26.61 | 24.8 | 86    | 118 | 71 | 86.67 | 53 | 17   | 7.1 | 4.5 | 1.7 | 0.7 | 22  | 21  | 33  | 217 | 219 | 143 | 37  | 153.4 | 5.9 | 70.5 | 468 | 15.4 | 45.2 | 19   | 291 | 16.1 | 0.81 | 142 | 4.6 | 103 | 9.4  | 5   | 60  | 12.9 | 14.3 | 0.5 | 0.5 |
| 57 F | 152.9 | 54.7 | 23.4  | 27.3 | 78    | 151 | 86 | 107.7 | 48 | 33.5 | 7.2 | 4.3 | 1.5 | 0.7 | 20  | 16  | 22  | 227 | 190 | 77  | 64  | 110.6 | 5.1 | 52.8 | 466 | 13.8 | 41.9 | 15.6 | 306 | 13.1 | 0.55 | 143 | 4.1 | 105 | 9.2  | 4.6 | 63  | 11.7 | 12.5 | 0.5 | 0.8 |
| 64 M | 162.2 | 84   | 31.93 | 34   | 103.5 | 169 | 97 | 121   | 68 | 10.6 | 7.5 | 4.2 | 1.3 | 1   | 23  | 10  | 54  | 246 | 196 | 141 | 50  | 117.8 | 5.4 | 67.9 | 561 | 16.1 | 48.8 | 23.3 | 393 | 13.4 | 0.85 | 140 | 3.9 | 101 | 9.4  | 6.1 | 78  | 15.3 | 14.1 | 0.8 | 1   |
| 57 M | 171.6 | 57.2 | 19.43 | 14.2 | 71    | 117 | 68 | 84.33 | 52 | 25.3 | 6.9 | 4.3 | 1.7 | 0.8 | 19  | 11  | 23  | 162 | 190 | 55  | 76  | 103   | 5   | 47.1 | 413 | 13.5 | 41.2 | 27.2 | 300 | 17.2 | 0.88 | 143 | 4.6 | 103 | 9.4  | 6.3 | 72  | 11.9 | 13.2 | 0.7 | 0.7 |
| 66 F | 150.1 | 46   | 20.42 | 23.2 | 67    | 112 | 61 | 78    | 74 | 24.8 | 7.9 | 4.8 | 1.5 | 1   | 26  | 28  | 17  | 360 | 196 | 92  | 72  | 105.6 | 5.3 | 77.2 | 418 | 13.2 | 39.5 | 24.7 | 269 | 11.6 | 0.68 | 143 | 4.6 | 104 | 9.7  | 5.1 | 78  | 11.9 | 11.6 | 0.7 | 2.1 |
| 65 F | 154   | 52.9 | 22.31 | 31.2 | 83.5  | 133 | 78 | 96.33 | 65 | 20.6 | 7.2 | 4.5 | 1.7 | 0.9 | 19  | 16  | 16  | 269 | 207 | 148 | 44  | 133.4 | 4.8 | 63.8 | 492 | 14.9 | 43.9 | 22.5 | 261 | 11.7 | 0.7  | 144 | 3.9 | 105 | 9.3  | 1   | 61  | 12.1 | 15.5 | 0.6 | 0.6 |
| 60 F | 156.3 | 47.6 | 19.48 | 22.4 | 65.5  | 121 | 79 | 93    | 64 | 25.4 | 7.8 | 4.3 | 1.2 | 0.7 | 23  | 19  | 14  | 232 | 151 | 97  | 57  | 74.6  | 4.8 | 36.7 | 414 | 11.9 | 37.7 | 22.2 | 222 | 16.1 | 0.5  | 143 | 4.1 | 104 | 9.5  | 3.9 | 89  | 8.5  | 8.9  | 0.7 | 0.7 |
| 60 M | 175.1 | 90.6 | 29.55 | 24.3 | 104.5 | 145 | 88 | 107   | 62 | 20.9 | 6.8 | 4.2 | 1.6 | 0.8 | 32  | 31  | 63  | 366 | 159 | 72  | 70  | 74.6  | 4.8 | 58   | 491 | 15.4 | 46.1 | 13.5 | 211 | 18.7 | 0.79 | 144 | 4.2 | 106 | 9    | 6.8 | 57  | 16.2 | 16.1 | 0.7 | 0.8 |
| 65 M | 165.3 | 70   | 25.62 | 29.7 | 85.5  | 168 | 98 | 121.3 | 63 | 16.3 | 7.7 | 4.6 | 1.5 | 0.7 | 34  | 37  | 50  | 311 | 207 | 154 | 47  | 129.2 | 5.4 | 79.5 | 482 | 15.5 | 45.4 | 23.3 | 300 | 21.2 | 0.84 | 140 | 4.9 | 102 | 9.6  | 7.7 | 95  | 11.9 | 13.9 | 0.9 | 0.8 |
| 80 M | 165.3 | 66.4 | 24.3  | 20.6 | 83.5  | 171 | 94 | 119.7 | 67 | 44.5 | 7.8 | 4.6 | 1.4 | 2.1 | 21  | 22  | 20  | 197 | 245 | 52  | 80  | 154.6 | 4.7 | 41.9 | 516 | 17.1 | 49.9 | 22.9 | 178 | 11.8 | 0.78 | 141 | 4.2 | 102 | 9.5  | 4.5 | 110 | 11.3 | 11.3 | 0.9 | 0.8 |
| 58 F | 156.9 | 50.1 | 20.35 | 24.2 | 79.5  | 114 | 57 | 76    | 66 | 4.4  | 6.1 | 3.9 | 1.8 | 1.2 | 19  | 17  | 10  | 163 | 243 | 88  | 58  | 167.4 | 5.5 | 58.8 | 414 | 12.6 | 38.3 | 15   | 328 | 14.1 | 0.49 | 144 | 4.7 | 106 | 9.2  | 4.3 | 99  | 12.9 | 9.2  | 0.7 | 0.7 |
| 60 M | 160.9 | 49.1 | 18.97 | 14.7 | 64.5  | 127 | 73 | 91    | 63 | 7.9  | 7.2 | 4.3 | 1.5 | 0.8 | 31  | 21  | 25  | 273 | 254 | 164 | 77  | 144.2 | 6.1 | 93.2 | 482 | 14.8 | 45.1 | 21.9 | 300 | 14   | 0.82 | 142 | 4.1 | 102 | 9.4  | 5   | 89  | 7.7  | 7.3  | 0.8 | 0.8 |
| 56 M | 172.5 | 75.9 | 25.51 | 21.2 | 91    | 133 | 79 | 97    | 54 | 9.7  | 6.7 | 4.4 | 1.9 | 1   | 19  | 23  | 25  | 296 | 176 | 155 | 53  | 92    | 8.2 | 73.5 | 488 | 15.4 | 47.2 | 20.5 | 353 | 8.7  | 0.8  | 143 | 4.6 | 102 | 9.7  | 5   | 52  | 16.6 | 14.9 | 0.9 | 0.9 |
| 52 F | 160   | 51.4 | 20.08 | 22.6 | 69.5  | 121 | 74 | 89.67 | 60 | 94.5 | 6.7 | 4.2 | 1.7 | 0.6 | 15  | 11  | 13  | 146 | 176 | 96  | 79  | 77.8  | 4.8 | 64.1 | 431 | 12.8 | 38.7 | 22.2 | 257 | 13.7 | 0.57 | 140 | 3.4 | 103 | 9.3  | 3.3 | 58  | 14.5 | 15.2 | 0.7 | 0.7 |
| 58 M | 171   | 58.9 | 20.14 | 15.6 | 76    | 118 | 80 | 92.67 | 78 | 6.4  | 7   | 4.3 | 1.6 | 0.7 | 100 | 114 | 875 | 411 | 193 | 473 | 50  | 48.4  | 5.5 | 49.7 | 460 | 14.5 | 43.4 | 33.4 | 172 | 12.7 | 0.75 | 141 | 4.9 | 104 | 9.2  | 5.6 | 73  | 12.7 | 14.6 | 0.7 | 0.7 |
| 66 F | 150.7 | 46.6 | 20.52 | 34.8 | 77    | 144 | 97 | 112.7 | 98 | 4.4  | 8.1 | 4.9 | 1.5 | 0.8 | 25  | 36  | 27  | 181 | 279 | 56  | 98  | 169.8 | 5   | 50.5 | 494 | 15.1 | 46.2 | 23.7 | 282 | 13.5 | 0.58 | 141 | 5.5 | 100 | 10.3 | 4.1 | 68  | 13.7 | 12   | 0.9 | 0.9 |
| 68 M | 179.3 | 69.8 | 21.71 | 17.5 | 82    | 143 | 93 | 109.7 | 65 | 15.9 | 6.6 | 3.9 | 1.4 | 0.6 | 18  | 19  | 25  | 139 | 182 | 80  | 64  | 102   | 5.9 | 48.5 | 452 | 14.5 | 43.9 | 16.4 | 241 | 14.3 | 0.98 | 143 | 4.1 | 106 | 8.9  | 6.6 | 61  | 15.4 | 14.3 | 0.9 | 0.7 |
| 65 M | 156.6 | 55.4 | 22.59 | 23.9 | 80    | 141 | 87 | 105   | 63 | 7.6  | 8.5 | 4.4 | 1.1 | 1.3 | 32  | 32  | 46  | 224 | 176 | 127 | 48  | 102.6 | 7.1 | 59.9 | 456 | 15.4 | 45.7 | 20.2 | 282 | 13.4 | 0.72 | 141 | 4.3 | 101 | 9.4  | 4.9 | 52  | 10.3 | 8.2  | 0.9 | 0.8 |
| 67 M | 172.5 | 80.4 | 27.02 | 28.8 | 95    | 131 | 82 | 98.33 | 56 | 16.9 | 7.1 | 4.4 | 1.6 | 1   | 28  | 29  | 73  | 257 | 234 | 169 | 54  | 146.2 | 5.8 | 62.6 | 519 | 16.5 | 49.6 | 18.1 | 230 |      |      |     |     |     |      |     |     |      |      |     |     |

|      |       |      |       |      |       |     |    |       |     |      |     |     |     |     |    |    |     |     |     |     |     |       |     |      |     |      |      |      |     |      |      |     |     |     |      |     |     |      |      |     |     |
|------|-------|------|-------|------|-------|-----|----|-------|-----|------|-----|-----|-----|-----|----|----|-----|-----|-----|-----|-----|-------|-----|------|-----|------|------|------|-----|------|------|-----|-----|-----|------|-----|-----|------|------|-----|-----|
| 67 M | 161.5 | 52.6 | 20.17 | 23   | 75    | 134 | 89 | 104   | 54  | 8.7  | 7.6 | 4.4 | 1.4 | 2   | 22 | 11 | 22  | 166 | 192 | 170 | 49  | 109   | 5   | 70.9 | 462 | 15.1 | 45.2 | 20.9 | 347 | 16.8 | 0.73 | 142 | 4.3 | 101 | 9    | 6.5 | 86  | 14.6 | 13.4 | 0.8 | 0.7 |
| 62 M | 154.9 | 53.3 | 22.21 | 21.5 | 79    | 137 | 78 | 97.67 | 73  | 3.5  | 8   | 4.6 | 1.4 | 0.5 | 21 | 24 | 198 | 299 | 165 | 240 | 48  | 69    | 7.6 | 83.2 | 397 | 12.9 | 39.1 | 23.7 | 411 | 23.4 | 1.21 | 138 | 5   | 101 | 10.7 | 5.2 | 102 | 15.3 | 14.4 | 0.6 | 0.7 |
| 52 F | 151.3 | 52.1 | 22.76 | 26.2 | 70.5  | 125 | 67 | 86.33 | 61  | 7.9  | 7.1 | 4.3 | 1.5 | 0.8 | 20 | 25 | 28  | 241 | 195 | 70  | 67  | 114   | 5   | 42.1 | 507 | 14.6 | 44.1 | 17.5 | 227 | 16.9 | 0.67 | 143 | 4.2 | 102 | 9.2  | 5   | 111 | 14.6 | 13.2 | 0.8 | 0.6 |
| 64 M | 160.5 | 52.6 | 20.42 | 19.2 | 74    | 140 | 78 | 98.67 | 59  | 10.6 | 6.9 | 4.3 | 1.7 | 0.6 | 33 | 37 | 15  | 186 | 184 | 72  | 73  | 96.6  | 6.3 | 47.7 | 440 | 14.2 | 44.1 | 22.5 | 300 | 14.1 | 0.83 | 140 | 4.6 | 102 | 9.2  | 4.1 | 89  | 14.8 | 18.2 | 0.6 | 0.7 |
| 62 F | 147.3 | 54.6 | 25.16 | 28.9 | 76.5  | 124 | 69 | 87.33 | 64  | 9.9  | 6.6 | 4.1 | 1.6 | 0.6 | 22 | 30 | 131 | 327 | 222 | 66  | 76  | 132.8 | 5.2 | 54   | 441 | 12.7 | 39.6 | 17.9 | 282 | 15.2 | 0.71 | 143 | 3.9 | 104 | 9.4  | 6.6 | 70  | 13.7 | 13.4 | 0.7 | 0.9 |
| 84 M | 154.5 | 51   | 21.37 | 17.5 | 80    | 135 | 77 | 96.33 | 56  | 118  | 7.1 | 4   | 1.3 | 0.7 | 22 | 20 | 38  | 221 | 149 | 79  | 53  | 80.2  | 5.7 | 73.9 | 476 | 14.1 | 43.6 | 23   | 367 | 12   | 0.86 | 140 | 5.2 | 102 | 9.7  | 5.4 | 81  | 13   | 12.5 | 1   | 1.2 |
| 80 F | 135.3 | 41.1 | 22.45 | 30.1 | 74    | 132 | 85 | 100.7 | 93  | 7.8  | 8   | 4.7 | 1.4 | 0.6 | 31 | 15 | 28  | 276 | 244 | 76  | 90  | 138.8 | 4.6 | 78.5 | 484 | 15.1 | 46.5 | 24.3 | 334 | 13.3 | 0.41 | 143 | 4.1 | 101 | 9.3  | 4.4 | 69  | 12.8 | 13.1 | 0.6 | 0.8 |
| 63 M | 172.5 | 60   | 20.16 | 26.5 | 78    | 127 | 81 | 96.33 | 58  | 38.1 | 7.4 | 4.5 | 1.6 | 0.8 | 18 | 17 | 24  | 165 | 250 | 81  | 71  | 162.8 | 5.1 | 77.5 | 489 | 15.3 | 46.5 | 21.9 | 296 | 15.5 | 0.86 | 142 | 4.1 | 104 | 9.7  | 7.2 | 116 | 11   | 12.1 | 0.7 | 0.7 |
| 54 M | 166.4 | 88.8 | 32.07 | 34.1 | 108.5 | 136 | 80 | 98.67 | 119 | 3.7  | 8.1 | 4.5 | 1.3 | 1.7 | 51 | 28 | 93  | 426 | 171 | 103 | 67  | 83.4  | 7.5 | 50   | 512 | 15.7 | 47.2 | 12.4 | 188 | 12   | 0.96 | 142 | 3.6 | 102 | 9.4  | 5.4 | 62  | 15.5 | 13.6 | 0.7 | 0.7 |
| 54 M | 174.2 | 73.6 | 24.25 | 21.9 | 84    | 123 | 78 | 93    | 53  | 11.4 | 7.1 | 4.4 | 1.6 | 0.7 | 19 | 20 | 51  | 179 | 229 | 251 | 46  | 132.8 | 5.4 | 69.6 | 527 | 15.7 | 47.3 | 21.8 | 233 | 12.8 | 0.79 | 142 | 4.3 | 105 | 9.3  | 6   | 72  | 9.8  | 9.7  | 0.7 | 0.7 |
| 53 M | 167.5 | 55.9 | 19.92 | 17.5 | 75.2  | 115 | 74 | 87.67 | 54  | 2.5  | 7.2 | 4.2 | 1.4 | 0.5 | 25 | 23 | 42  | 142 | 202 | 58  | 81  | 109.4 | 5.2 | 51.2 | 472 | 14.6 | 42.9 | 24   | 225 | 20.4 | 0.81 | 139 | 4.2 | 102 | 8.9  | 5.2 | 80  | 12.3 | 15.3 | 0.5 | 0.5 |
| 51 M | 164.1 | 54.3 | 20.16 | 18.6 | 71    | 113 | 70 | 84.33 | 57  | 5    | 7.4 | 4.5 | 1.6 | 1.3 | 33 | 25 | 33  | 163 | 211 | 74  | 95  | 101.2 | 5.1 | 47.8 | 451 | 14.9 | 44.4 | 13.1 | 186 | 22.3 | 0.8  | 143 | 4.4 | 103 | 9.2  | 5.1 | 105 | 13.5 | 15.5 | 0.5 | 0.5 |
| 67 F | 151.1 | 51.1 | 22.38 | 27.4 | 77    | 132 | 72 | 92    | 82  | 6.5  | 7.4 | 4.5 | 1.6 | 0.7 | 19 | 10 | 15  | 199 | 243 | 99  | 106 | 117.2 | 5.2 | 34.9 | 412 | 12.1 | 38.2 | 29.1 | 340 | 13.3 | 0.55 | 141 | 3.9 | 102 | 9.4  | 4.3 | 297 | 12.9 | 12.7 | 0.7 | 0.8 |
| 59 F | 153.7 | 48.3 | 20.45 | 27.3 | 76.5  | 114 | 61 | 78.67 | 69  | 9.5  | 7.2 | 4.2 | 1.4 | 0.4 | 17 | 9  | 15  | 280 | 218 | 89  | 53  | 147.2 | 5.1 | 62.4 | 390 | 11.3 | 35   | 32.3 | 328 | 15.9 | 0.56 | 142 | 3.9 | 105 | 9.1  | 3.7 | 129 | 12.9 | 11.4 | 0.8 | 0.7 |
| 56 F | 155.9 | 49.6 | 20.41 | 26.1 | 71    | 94  | 44 | 60.67 | 59  | 27.1 | 6.9 | 4.4 | 1.8 | 0.6 | 26 | 16 | 14  | 171 | 207 | 58  | 80  | 115.4 | 5.4 | 50.1 | 417 | 12.5 | 38.6 | 16.4 | 306 | 19.5 | 0.89 | 142 | 4.4 | 102 | 9.2  | 4.8 | 123 | 9.5  | 9.1  | 0.7 | 0.5 |
| 56 F | 157.3 | 51   | 20.61 | 26.8 | 75    | 125 | 84 | 97.67 | 90  | 3.2  | 7.7 | 4.8 | 1.7 | 1   | 22 | 28 | 41  | 308 | 282 | 266 | 54  | 174.8 | 5.4 | 57.2 | 425 | 13.1 | 40.3 | 21.4 | 277 | 13.2 | 0.86 | 142 | 4.5 | 101 | 10.1 | 4.9 | 117 | 14.7 | 14.3 | 0.5 | 0.8 |
| 63 F | 149.2 | 59.7 | 26.82 | 35.6 | 83    | 142 | 84 | 103.3 | 59  | 40.5 | 7.3 | 4.6 | 1.7 | 0.6 | 17 | 12 | 17  | 162 | 192 | 100 | 63  | 109   | 7.1 | 63.5 | 428 | 13.2 | 40.2 | 29.3 | 353 | 14.1 | 0.58 | 141 | 4   | 102 | 9.5  | 3.3 | 91  | 19.4 | 17.7 | 0.5 | 1   |
| 61 M | 169.3 | 84.4 | 29.45 | 36.3 | 106.5 | 127 | 83 | 97.67 | 83  | 47.8 | 7.6 | 4.6 | 1.5 | 0.6 | 47 | 49 | 166 | 220 | 213 | 302 | 49  | 103.6 | 6.5 | 67.9 | 510 | 17.6 | 51   | 10.9 | 269 | 14.2 | 0.85 | 139 | 4.6 | 101 | 9.4  | 6.7 | 46  | 14.2 | 16.6 | 0.9 | 1.7 |
| 58 F | 153.3 | 62.6 | 26.64 | 35.4 | 84    | 129 | 82 | 97.67 | 48  | 7.8  | 7   | 4.3 | 1.6 | 0.9 | 23 | 14 | 24  | 181 | 191 | 51  | 119 | 61.8  | 5   | 27.6 | 380 | 12.5 | 38.2 | 16.7 | 286 | 13.8 | 0.59 | 144 | 4.1 | 104 | 9.3  | 5.9 | 56  | 15.2 | 15.5 | 0.8 | 0.7 |
| 51 F | 156   | 65.4 | 26.87 | 46.2 | 90    | 115 | 79 | 91    | 69  | 4.1  | 7.3 | 4.5 | 1.6 | 1   | 17 | 19 | 17  | 174 | 277 | 112 | 87  | 167.6 | 4.8 | 55.9 | 492 | 13.2 | 41.7 | 29.3 | 273 | 13.6 | 0.53 | 141 | 4.3 | 103 | 9.3  | 3.7 | 85  | 14.5 | 15.7 | 0.7 | 0.7 |
| 66 F | 153.5 | 80.4 | 34.12 | 27   | 108   | 134 | 79 | 97.33 | 63  | 7.6  | 7.1 | 4.1 | 1.4 | 0.7 | 53 | 68 | 26  | 215 | 180 | 132 | 53  | 100.6 | 6.1 | 68.2 | 469 | 14.1 | 42.9 | 17.5 | 241 | 12.8 | 0.51 | 141 | 4.4 | 103 | 8.9  | 5.9 | 57  | 8.9  | 7.9  | 0.9 | 0.9 |
| 42 M | 167.7 | 60.3 | 21.44 | 16.5 | 68.5  | 138 | 72 | 94    | 49  | 2.1  | 7   | 4.2 | 1.5 | 1.2 | 28 | 18 | 25  | 253 | 186 | 84  | 66  | 103.2 | 4.7 | 55.7 | 513 | 15.3 | 44.3 | 23.3 | 273 | 12.8 | 0.84 | 142 | 4.3 | 102 | 9.2  | 6.1 | 104 | 14.4 | 11.7 | 0.7 | 0.7 |
| 67 F | 155.9 | 54.3 | 22.34 | 29.8 | 79.5  | 121 | 74 | 89.67 | 60  | 26   | 7.1 | 4.5 | 1.7 | 0.7 | 25 | 20 | 16  | 242 | 209 | 86  | 71  | 120.8 | 5.1 | 54.7 | 442 | 13.1 | 41.1 | 27   | 306 | 11.1 | 0.54 | 144 | 4.2 | 105 | 9.6  | 4.2 | 61  | 10.9 | 7.7  | 1   | 0.8 |
| 67 M | 160.3 | 75.6 | 29.42 | 28.6 | 97.5  | 134 | 82 | 99.33 | 71  | 8.6  | 6.8 | 4.5 | 2   | 1.4 | 31 | 7  | 16  | 186 | 224 | 128 | 51  | 147.4 | 5   | 44.2 | 503 | 16.2 | 48.2 | 16.9 | 273 | 11.7 | 0.93 | 144 | 4.9 | 104 | 9.2  | 5.3 | 117 | 14.4 | 15.6 | 0.6 | 0.7 |
| 64 M | 162.1 | 53.2 | 20.25 | 20.1 | 72    | 146 | 89 | 108   | 72  | 2    | 7.5 | 4.6 | 1.6 | 0.5 | 84 | 86 | 116 | 260 | 133 | 154 | 51  | 51.2  | 5.2 | 64.6 | 484 | 16.2 | 47.1 | 19.1 | 254 | 14.8 | 0.93 | 140 | 4.2 | 99  | 9    | 6.3 | 136 | 14.2 | 16.3 | 1.4 | 1.4 |
| 64 M | 158.9 | 61.9 | 24.52 | 27.6 | 83    | 134 | 86 | 102   | 67  | 3.3  | 7.6 | 4.6 | 1.5 | 0.8 | 27 | 26 | 92  | 170 | 221 | 164 | 69  | 119.2 | 5.1 | 49.6 | 478 | 14.2 | 42.6 | 27.6 | 261 | 18.8 | 0.8  | 142 | 3.8 | 100 | 9.4  | 5.9 | 63  | 20.9 | 21.1 | 0.8 | 0.8 |
| 49 F | 148.1 | 56.4 | 25.71 | 41   | 89    | 135 | 85 | 101.7 | 73  | 2.3  | 7.8 | 4.6 | 1.4 | 0.8 | 26 | 44 | 33  | 201 | 230 | 130 | 60  | 144   | 5.9 | 58.5 | 483 | 13.5 | 40.4 | 25.2 | 215 | 12.8 | 0.5  | 141 | 3.9 | 103 | 9.3  | 5.4 | 59  | 11.9 | 13.2 | 0.6 | 0.7 |
| 60 M | 164.6 | 76   | 28.05 | 32.4 | 92.5  | 127 | 77 | 93.67 | 51  | 27.7 | 6.7 | 4.2 | 1.7 | 1   | 40 | 60 | 47  | 203 | 186 | 80  | 45  | 125   | 7.1 | 71.1 | 560 | 16.1 | 48.7 | 16.2 | 244 | 14.2 | 0.84 | 143 | 4.2 | 106 | 8.8  | 5.2 | 117 | 11.8 | 9.1  | 1.1 | 1.1 |
| 65 M | 171.7 | 84.2 | 28.56 | 31.3 | 108   | 149 | 79 | 102.3 | 64  | 2.1  | 7.5 | 4.7 | 1.7 | 0.5 | 18 | 33 | 40  | 184 | 206 | 89  | 53  | 135.2 | 5.9 | 63.9 | 505 | 15.2 | 46.4 | 23.9 | 353 | 13.8 | 0.63 | 142 | 4.3 | 105 | 9.5  | 5.7 | 89  | 13.8 | 14.2 | 0.8 | 1   |
| 60 F | 154.9 | 59.4 | 24.76 | 29.3 | 82    | 161 | 88 | 112.3 | 56  | 21.2 | 7.5 | 4.3 | 1.3 | 0.9 | 17 | 14 | 18  | 190 | 197 | 95  | 86  | 92    | 5.1 | 74.6 | 438 | 14.4 | 42.2 | 30.1 | 296 | 10.9 | 0.63 | 141 | 3.8 | 100 | 9.4  | 4   | 73  | 9.7  | 10.4 | 0.8 | 0.9 |
| 64 M | 163.1 | 54.5 | 20.49 | 17.9 | 75    | 132 | 90 | 104   | 70  | 12.1 | 7   | 3.7 | 1.1 | 0.9 | 20 | 18 | 39  | 257 | 216 | 96  | 78  | 118.8 | 5.3 | 54.1 | 455 | 14.4 | 44   | 20.4 | 296 | 14   | 0.97 | 140 | 3.7 | 103 | 8.7  | 6.7 | 74  | 11.1 | 13   | 0.7 | 0.7 |
| 67 M | 159.3 | 62.6 | 24.67 | 26.3 | 86.5  | 142 | 72 | 95.33 | 54  | 14.4 | 6.7 | 4.1 | 1.6 | 0.6 | 34 | 51 | 38  | 242 | 190 | 94  | 46  | 125.2 | 5.5 | 67.3 | 492 | 15.1 | 46.5 | 26.1 | 291 | 16.3 | 0.77 | 142 | 4   | 102 | 9.1  | 6.7 | 94  | 8.2  | 12.7 | 1.1 | 0.8 |
| 57 F | 152.4 | 52.4 | 22.56 | 29.7 | 73.5  | 158 | 89 | 112   | 75  | 7    | 7.7 | 4.7 | 1.6 | 1.1 | 20 | 13 | 14  | 289 | 209 | 81  | 66  | 126.8 | 4.7 | 59   | 464 | 14.5 | 42.4 | 24.3 | 230 | 17.4 | 0.59 | 142 | 4   | 102 | 9.6  | 4.6 | 71  | 11.4 | 14.9 | 0.8 | 0.8 |
| 56 M | 164.1 | 69.2 | 25.7  | 25.6 | 86    | 131 | 93 | 105.7 | 71  | 3.1  | 7.4 | 4.6 | 1.6 | 0.7 | 16 | 27 | 74  | 199 | 179 | 141 | 35  | 115.8 | 5.1 | 55.8 | 555 | 16.1 | 48.9 | 21.5 | 250 | 13.7 | 1.05 | 143 | 4.1 | 103 | 9.3  | 6.4 | 80  | 8.3  | 11.1 | 0.6 | 0.6 |
| 58 F | 145.3 | 48.6 | 23.02 | 29.4 | 79    | 136 | 67 | 90    | 40  | 10.8 | 7   | 4.4 | 1.7 | 0.5 | 15 | 12 | 20  | 207 | 208 | 77  | 82  | 110.6 | 5.2 | 47.3 | 401 | 12.5 | 38.6 | 17.5 | 233 | 18.2 | 0.61 | 141 | 4   | 102 | 9.1  | 4.6 | 42  | 15.5 | 14.9 | 0.7 | 0.7 |
| 53 F | 158.2 | 70.6 | 28.21 | 37.4 | 95    | 132 | 77 | 95.33 | 75  | 18.2 | 7.4 | 4.1 | 1.2 | 0.6 | 23 | 19 | 20  | 208 | 179 | 73  | 59  | 105.4 | 5   | 72.8 | 467 | 12.6 | 38.4 | 25.3 | 347 |      |      |     |     |     |      |     |     |      |      |     |     |

|      |       |      |       |      |      |     |     |       |    |      |     |     |     |     |    |     |     |     |     |     |     |       |     |      |     |      |      |      |     |      |      |     |     |     |     |     |     |      |      |     |     |
|------|-------|------|-------|------|------|-----|-----|-------|----|------|-----|-----|-----|-----|----|-----|-----|-----|-----|-----|-----|-------|-----|------|-----|------|------|------|-----|------|------|-----|-----|-----|-----|-----|-----|------|------|-----|-----|
| 64 F | 156.9 | 49   | 19.9  | 25.9 | 74   | 143 | 81  | 101.7 | 60 | 13.9 | 7.4 | 4.5 | 1.6 | 0.7 | 19 | 13  | 17  | 283 | 191 | 71  | 59  | 117.8 | 6   | 41.5 | 425 | 12.7 | 39.3 | 16.4 | 261 | 13.4 | 0.57 | 142 | 4.1 | 101 | 9.5 | 3   | 58  | 14.7 | 13.1 | 0.8 | 0.8 |
| 44 M | 173.3 | 76.7 | 25.54 | 25.9 | 87   | 140 | 84  | 102.7 | 65 | 5.8  | 7.5 | 4.3 | 1.3 | 0.7 | 35 | 53  | 101 | 176 | 209 | 470 | 40  | 75    | 5.3 | 60.7 | 470 | 14.1 | 42.2 | 27.3 | 197 | 12.8 | 0.86 | 141 | 4.2 | 103 | 9.2 | 7.2 | 139 | 14.6 | 15.3 | 0.6 | 0.6 |
| 52 F | 154.6 | 68.7 | 28.74 | 47.7 | 96   | 108 | 74  | 85.33 | 72 | 2.5  | 7.1 | 4   | 1.3 | 0.5 | 83 | 163 | 39  | 297 | 243 | 131 | 52  | 164.8 | 6   | 85.2 | 435 | 14.1 | 41.6 | 22.4 | 334 | 8.9  | 0.53 | 142 | 4   | 105 | 9.2 | 4.7 | 44  | 14   | 15   | 0.7 | 0.6 |
| 55 M | 166.3 | 71.3 | 25.78 | 31   | 90   | 139 | 91  | 107   | 69 | 12   | 7.2 | 4.3 | 1.5 | 1.1 | 16 | 18  | 73  | 123 | 255 | 123 | 83  | 147.4 | 5   | 97   | 436 | 14.4 | 42.6 | 26.9 | 222 | 14.2 | 0.66 | 142 | 3.9 | 100 | 8.9 | 4.5 | 50  | 13.9 | 12.5 | 0.8 | 0.6 |
| 65 F | 153.9 | 53.1 | 22.42 | 33.4 | 74.5 | 121 | 61  | 81    | 57 | 6.6  | 6.9 | 4.1 | 1.5 | 0.8 | 21 | 15  | 13  | 189 | 240 | 93  | 60  | 161.4 | 5   | 51.8 | 428 | 13.6 | 41.4 | 20.1 | 265 | 13.3 | 0.68 | 143 | 4.1 | 103 | 9.3 | 4.6 | 53  | 7.8  | 9.1  | 0.8 | 0.9 |
| 58 M | 168.3 | 84.4 | 29.8  | 31.9 | 98.5 | 125 | 73  | 90.33 | 48 | 14.5 | 7.6 | 4.7 | 1.6 | 2.1 | 29 | 28  | 22  | 199 | 178 | 73  | 63  | 100.4 | 5.2 | 59   | 516 | 16.7 | 49.5 | 16.1 | 241 | 15.2 | 0.94 | 144 | 4.1 | 101 | 9.8 | 7.9 | 138 | 13.4 | 12.6 | 0.7 | 0.6 |
| 55 F | 158.6 | 64.8 | 25.76 | 35.9 | 83.5 | 166 | 91  | 116   | 63 | 11.9 | 7   | 4.3 | 1.6 | 0.7 | 18 | 16  | 40  | 129 | 229 | 80  | 76  | 137   | 5.2 | 47.8 | 492 | 14   | 43.6 | 31   | 230 | 15.3 | 0.54 | 143 | 4.3 | 104 | 9   | 5.1 | 89  | 16.7 | 15.4 | 0.7 | 0.7 |
| 61 F | 156.1 | 53   | 21.75 | 23.4 | 71   | 130 | 68  | 88.67 | 55 | 12.2 | 7.7 | 4.2 | 1.2 | 0.9 | 18 | 13  | 17  | 172 | 239 | 79  | 84  | 139.2 | 5.3 | 91.7 | 447 | 13.5 | 42.4 | 21.9 | 282 | 15.3 | 0.66 | 142 | 3.9 | 103 | 9   | 4.7 | 107 | 13   | 11.9 | 0.6 | 0.6 |
| 53 M | 164.1 | 72.5 | 26.92 | 28.2 | 92.5 | 127 | 79  | 95    | 77 | 2.8  | 7   | 4.2 | 1.5 | 0.5 | 27 | 41  | 45  | 397 | 220 | 531 | 34  | 79.8  | 6.1 | 70.7 | 551 | 16.2 | 48.5 | 21.7 | 254 | 11   | 1.05 | 142 | 4.1 | 104 | 9   | 6.9 | 65  | 11.1 | 10.8 | 0.7 | 0.5 |
| 65 F | 142.2 | 45.9 | 22.7  | 31.5 | 78   | 149 | 95  | 113   | 82 | 11   | 8.5 | 4.4 | 1.1 | 0.7 | 19 | 14  | 18  | 176 | 219 | 159 | 49  | 138.2 | 5.2 | 48.8 | 429 | 12.6 | 39.3 | 18.7 | 273 | 22.4 | 0.6  | 143 | 3.5 | 103 | 9.4 | 5.6 | 149 | 15.4 | 13.3 | 1   | 1   |
| 68 M | 161.3 | 57.3 | 22.02 | 21.7 | 76   | 160 | 85  | 110   | 87 | 6.7  | 7.7 | 4.5 | 1.4 | 0.7 | 28 | 34  | 33  | 283 | 219 | 130 | 49  | 144   | 5.4 | 61.4 | 554 | 16.4 | 50.2 | 16.7 | 411 | 19.6 | 0.93 | 143 | 4   | 102 | 9.3 | 6.5 | 114 | 18.5 | 19.7 | 1.4 | 1.2 |
| 66 F | 150.7 | 59.7 | 26.29 | 42.8 | 95   | 117 | 64  | 81.67 | 71 | 8.7  | 7.6 | 4.4 | 1.4 | 0.8 | 17 | 13  | 24  | 255 | 324 | 204 | 65  | 218.2 | 5.5 | 52.9 | 463 | 14.1 | 44.4 | 26.8 | 353 | 16.8 | 0.47 | 142 | 3.9 | 102 | 9.4 | 4.6 | 84  | 15.8 | 13.2 | 0.5 | 0.7 |
| 67 M | 175.2 | 74.5 | 24.27 | 29.1 | 97   | 143 | 95  | 111   | 57 | 4.2  | 7.1 | 4   | 1.3 | 0.9 | 19 | 12  | 33  | 159 | 192 | 174 | 43  | 114.2 | 5.6 | 73.8 | 470 | 15.2 | 46.7 | 16.7 | 347 | 17.7 | 0.88 | 140 | 4.1 | 101 | 8.8 | 5.8 | 80  | 7.3  | 7.8  | 0.8 | 2.1 |
| 55 F | 153.5 | 68.1 | 28.9  | 47   | 93   | 131 | 71  | 91    | 68 | 18.2 | 7.5 | 4.4 | 1.4 | 0.5 | 48 | 61  | 47  | 287 | 165 | 121 | 58  | 82.8  | 7.2 | 42.6 | 433 | 13   | 40.6 | 15.9 | 273 | 10.3 | 0.53 | 144 | 3.9 | 104 | 9.4 | 3.3 | 61  | 12.8 | 11.7 | 0.6 | 0.7 |
| 68 F | 146.5 | 45.1 | 21.01 | 28.4 | 74.5 | 154 | 90  | 111.3 | 69 | 11.4 | 7.2 | 4.2 | 1.4 | 1.1 | 24 | 10  | 10  | 245 | 198 | 49  | 67  | 121.2 | 5   | 59.2 | 421 | 12.6 | 40   | 22.6 | 291 | 15.6 | 0.59 | 141 | 3.4 | 101 | 8.9 | 3.8 | 78  | 13.3 | 13.3 | 0.7 | 0.7 |
| 57 F | 156.6 | 59.1 | 24.1  | 30.4 | 83.5 | 150 | 85  | 106.7 | 74 | 10.4 | 7.7 | 4.7 | 1.6 | 1.2 | 13 | 14  | 21  | 264 | 256 | 108 | 63  | 171.4 | 5.3 | 34.1 | 483 | 14.1 | 43.2 | 23.6 | 311 | 13.9 | 0.54 | 144 | 4.5 | 103 | 9.9 | 4.3 | 78  | 19   | 15.6 | 0.7 | 0.7 |
| 57 F | 152.1 | 53.8 | 23.26 | 32.7 | 79.5 | 130 | 77  | 94.67 | 52 | 9.8  | 8.5 | 4.3 | 1   | 0.7 | 21 | 15  | 18  | 326 | 225 | 137 | 42  | 155.6 | 5   | 51   | 414 | 13.2 | 40.1 | 19.5 | 334 | 11.8 | 0.53 | 142 | 4.3 | 103 | 9.3 | 5.5 | 96  | 15.7 | 15.5 | 0.9 | 0.8 |
| 67 F | 147.7 | 46.5 | 21.32 | 29.7 | 69.5 | 121 | 71  | 87.67 | 72 | 37.8 | 6.7 | 4.1 | 1.6 | 0.7 | 21 | 17  | 26  | 336 | 215 | 72  | 104 | 96.6  | 5.8 | 57   | 431 | 13.4 | 41.6 | 17.1 | 273 | 10.4 | 0.54 | 143 | 4.3 | 100 | 9.3 | 4.2 | 106 | 9.4  | 11.3 | 0.7 | 0.6 |
| 65 F | 151.7 | 50.4 | 21.9  | 27.6 | 74.5 | 130 | 79  | 96    | 67 | 21.1 | 7.5 | 4.3 | 1.3 | 0.7 | 20 | 16  | 17  | 264 | 257 | 178 | 54  | 167.4 | 5.7 | 63.6 | 447 | 13.7 | 42.7 | 27.4 | 340 | 11.5 | 0.61 | 143 | 4   | 104 | 9.6 | 3.6 | 82  | 13.8 | 12.6 | 0.6 | 0.6 |
| 64 M | 172.5 | 65.3 | 21.94 | 23.1 | 81   | 147 | 98  | 114.3 | 83 | 4.7  | 7.9 | 4.7 | 1.5 | 0.7 | 44 | 35  | 158 | 199 | 217 | 162 | 59  | 125.6 | 5.2 | 61.6 | 545 | 17.2 | 50.4 | 17.9 | 316 | 14.2 | 0.77 | 142 | 3.9 | 102 | 9.7 | 6.2 | 122 | 15.2 | 16.3 | 0.8 | 0.8 |
| 61 F | 153.5 | 50.1 | 21.26 | 31.6 | 76.5 | 150 | 82  | 104.7 | 75 | 6    | 7.9 | 4.4 | 1.3 | 0.8 | 19 | 20  | 30  | 240 | 210 | 60  | 55  | 143   | 5.3 | 50.3 | 537 | 15.8 | 47.6 | 26.3 | 316 | 10.2 | 0.58 | 143 | 4.2 | 104 | 9.6 | 5.4 | 138 | 11.8 | 13   | 1   | 1.2 |
| 63 M | 172.9 | 63.7 | 21.31 | 16.8 | 78   | 151 | 86  | 107.7 | 53 | 21.4 | 7   | 4.2 | 1.5 | 0.7 | 21 | 15  | 30  | 178 | 231 | 88  | 79  | 134.4 | 5.3 | 47.5 | 440 | 14.1 | 43.5 | 21.1 | 311 | 20.3 | 0.73 | 142 | 3.9 | 105 | 8.9 | 5.6 | 94  | 11.9 | 9.5  | 0.7 | 0.8 |
| 64 F | 148.3 | 66.8 | 30.37 | 41.5 | 92   | 123 | 81  | 95    | 61 | 26.4 | 7.5 | 4.4 | 1.4 | 0.9 | 23 | 20  | 17  | 214 | 220 | 99  | 66  | 134.2 | 5.2 | 50   | 485 | 14.8 | 45.8 | 22.7 | 257 | 11.3 | 0.5  | 141 | 3.8 | 99  | 9.5 | 3.8 | 98  | 9.5  | 11.4 | 0.7 | 0.8 |
| 51 M | 166.1 | 67.4 | 24.43 | 26.4 | 83.5 | 139 | 84  | 102.3 | 48 | 4    | 7   | 4.6 | 1.9 | 0.7 | 26 | 19  | 34  | 145 | 172 | 60  | 71  | 89    | 5.2 | 53.7 | 481 | 14.9 | 44.8 | 20.4 | 235 | 18.9 | 1.03 | 143 | 4.1 | 104 | 9.5 | 7.8 | 49  | 19.6 | 14.7 | 0.8 | 0.8 |
| 66 M | 166   | 63.6 | 23.08 | 17.6 | 85.5 | 153 | 94  | 113.7 | 55 | 18   | 7.2 | 4.5 | 1.7 | 0.8 | 21 | 16  | 19  | 190 | 220 | 93  | 48  | 153.4 | 6.2 | 61.2 | 430 | 13.1 | 40.5 | 21.5 | 273 | 21.6 | 1.07 | 140 | 4.3 | 103 | 8.9 | 6.1 | 67  | 8.5  | 9.5  | 0.7 | 0.8 |
| 64 F | 157.7 | 64.5 | 25.94 | 36.2 | 94.5 | 147 | 83  | 104.3 | 70 | 42.4 | 6.7 | 4.2 | 1.7 | 0.5 | 15 | 11  | 14  | 125 | 250 | 163 | 46  | 171.4 | 5.8 | 51.7 | 522 | 13.2 | 42.1 | 21.5 | 269 | 12.2 | 0.56 | 144 | 4.5 | 104 | 8.8 | 4.5 | 74  | 12.7 | 10.1 | 0.6 | 0.8 |
| 65 F | 154.5 | 49.7 | 20.82 | 24.6 | 76.5 | 114 | 73  | 86.67 | 61 | 23.1 | 6.9 | 3.9 | 1.3 | 0.7 | 25 | 25  | 19  | 173 | 172 | 87  | 73  | 81.6  | 5.6 | 49.4 | 435 | 12.8 | 39.5 | 25.2 | 282 | 19.8 | 0.68 | 145 | 4.2 | 106 | 9   | 5.5 | 68  | 10.5 | 9.2  | 0.8 | 0.8 |
| 65 M | 162.5 | 58   | 21.96 | 17.2 | 78   | 164 | 105 | 124.7 | 71 | 10.8 | 7.4 | 4.4 | 1.5 | 1.4 | 21 | 17  | 23  | 238 | 199 | 88  | 86  | 95.4  | 5   | 48.7 | 511 | 15.9 | 47.6 | 18.1 | 176 | 17.4 | 0.87 | 142 | 3.8 | 102 | 9.1 | 0.8 | 85  | 11.8 | 12.6 | 0.7 | 0.8 |
| 66 M | 159.6 | 64.1 | 25.16 | 28.5 | 82   | 154 | 87  | 109.3 | 79 | 6.4  | 7.5 | 4.3 | 1.3 | 0.5 | 22 | 18  | 91  | 159 | 202 | 153 | 94  | 77.4  | 5   | 44.9 | 547 | 14   | 42.6 | 25.6 | 213 | 23.8 | 0.92 | 141 | 4.6 | 101 | 9.2 | 7.3 | 87  | 11.2 | 13.2 | 1.3 | 0.9 |
| 51 M | 164.9 | 56.7 | 20.85 | 17.7 | 71.5 | 154 | 110 | 124.7 | 69 | 10.5 | 8.2 | 4.1 | 1   | 0.7 | 22 | 15  | 29  | 266 | 192 | 127 | 49  | 117.6 | 5.2 | 84.5 | 459 | 14   | 43.4 | 30.7 | 431 | 15.7 | 1.17 | 138 | 4   | 99  | 9.4 | 5.6 | 146 | 15   | 16   | 0.7 | 0.8 |
| 62 F | 151.3 | 38.2 | 16.69 | 16.1 | 62   | 124 | 77  | 92.67 | 72 | 15.5 | 7.3 | 4.6 | 1.7 | 0.7 | 24 | 13  | 19  | 258 | 173 | 66  | 70  | 89.8  | 5.4 | 35.5 | 477 | 13.2 | 40.6 | 26.7 | 291 | 10.6 | 0.45 | 142 | 3.7 | 102 | 8.9 | 3.3 | 90  | 11.7 | 9.8  | 0.6 | 0.7 |
| 70 M | 161.7 | 68.4 | 26.16 | 22.2 | 87   | 154 | 87  | 109.3 | 71 | 6.1  | 8   | 4.3 | 1.2 | 0.9 | 24 | 37  | 33  | 209 | 215 | 149 | 49  | 136.2 | 5.3 | 72.7 | 475 | 14.6 | 45.2 | 25.3 | 261 | 13.2 | 0.81 | 141 | 4.2 | 103 | 9.1 | 6.1 | 69  | 15.5 | 13.3 | 1   | 0.7 |
| 62 F | 155.3 | 57.3 | 23.76 | 31   | 80.5 | 116 | 61  | 79.33 | 61 | 7.3  | 6.9 | 4.3 | 1.7 | 0.7 | 26 | 18  | 16  | 264 | 234 | 86  | 73  | 143.8 | 4.9 | 57.1 | 462 | 14.3 | 46   | 14.7 | 209 | 17.1 | 0.57 | 143 | 3.9 | 101 | 9.2 | 5.6 | 87  | 15.3 | 12.2 | 0.7 | 0.9 |
| 59 M | 165.8 | 66.3 | 24.12 | 22.7 | 82.5 | 126 | 81  | 96    | 62 | 8.5  | 7   | 4.2 | 1.5 | 0.9 | 23 | 17  | 67  | 230 | 220 | 316 | 51  | 105.8 | 5.1 | 77   | 470 | 16.4 | 47.6 | 21.8 | 311 | 11.6 | 0.71 | 145 | 3.9 | 105 | 9.3 | 5.7 | 66  | 11.3 | 11.2 | 0.7 | 0.5 |
| 64 M | 160.9 | 57.6 | 22.25 | 22.8 | 75   | 150 | 81  | 104   | 52 | 8.5  | 8.1 | 4.9 | 1.5 | 0.8 | 26 | 26  | 53  | 259 | 225 | 125 | 54  | 146   | 5.5 | 72.7 | 530 | 15.4 | 46.9 | 23   | 277 | 12.4 | 0.69 | 142 | 4.1 | 101 | 9.5 | 5.9 | 151 | 13.3 | 14.1 | 1   | 0.8 |
| 81 M | 165.7 | 62.3 | 22.69 | 26.3 | 81.5 | 132 | 79  | 96.67 | 61 | 25.2 | 7.5 | 4.2 | 1.3 | 0.6 | 27 | 17  | 15  | 277 | 175 | 81  | 46  | 112.8 | 5.5 | 59.7 | 508 | 16   |      |      |     |      |      |     |     |     |     |     |     |      |      |     |     |

|      |       |       |       |      |       |     |     |       |    |      |     |     |     |     |     |    |     |     |     |     |     |       |     |      |     |      |      |      |     |      |      |     |     |     |     |     |     |      |      |     |     |
|------|-------|-------|-------|------|-------|-----|-----|-------|----|------|-----|-----|-----|-----|-----|----|-----|-----|-----|-----|-----|-------|-----|------|-----|------|------|------|-----|------|------|-----|-----|-----|-----|-----|-----|------|------|-----|-----|
| 80 M | 154.8 | 57.5  | 24    | 27.2 | 85    | 133 | 80  | 97.67 | 68 | 12   | 7.3 | 4.1 | 1.3 | 1.2 | 18  | 13 | 19  | 217 | 262 | 116 | 63  | 175.8 | 5.9 | 55.9 | 456 | 13.8 | 42.5 | 20.3 | 306 | 16.2 | 0.9  | 141 | 3.9 | 103 | 8.8 | 4.6 | 72  | 13   | 12.8 | 1.4 | 1.1 |
| 76 F | 142.8 | 49.7  | 24.37 | 38.3 | 75    | 119 | 79  | 92.33 | 81 | 24.9 | 7.1 | 4.2 | 1.4 | 0.9 | 25  | 11 | 15  | 197 | 182 | 101 | 64  | 97.8  | 5.1 | 41.9 | 451 | 13   | 40.6 | 14.5 | 247 | 17.9 | 0.57 | 143 | 4.1 | 105 | 9.2 | 4.2 | 90  | 10.6 | 10.5 | 0.8 | 0.6 |
| 70 F | 145   | 51.1  | 24.3  | 31.3 | 71.3  | 130 | 65  | 86.67 | 59 | 15.4 | 7.8 | 4.6 | 1.4 | 0.6 | 23  | 16 | 15  | 169 | 212 | 89  | 61  | 133.2 | 5.3 | 53.1 | 388 | 12.6 | 38.8 | 16.4 | 269 | 11.6 | 0.56 | 144 | 4.1 | 105 | 9.2 | 4.9 | 117 | 10.7 | 10.8 | 0.8 | 0.7 |
| 71 M | 165.3 | 69    | 25.25 | 23.8 | 86.5  | 146 | 82  | 103.3 | 57 | 19.2 | 7.7 | 4.2 | 1.2 | 0.8 | 21  | 18 | 50  | 258 | 176 | 109 | 48  | 106.2 | 5   | 69.5 | 483 | 14.9 | 45.2 | 23.4 | 311 | 15.7 | 0.92 | 141 | 4.1 | 102 | 9.4 | 5.6 | 130 | 11.4 | 12.2 | 1   | 0.8 |
| 60 M | 171.7 | 67.9  | 23.03 | 23.9 | 80    | 135 | 87  | 103   | 64 | 17.8 | 7.7 | 4.4 | 1.3 | 1   | 25  | 27 | 61  | 132 | 236 | 111 | 54  | 159.8 | 5.3 | 71.6 | 525 | 16.5 | 50.3 | 20.5 | 347 | 15.2 | 0.93 | 142 | 4   | 103 | 9.4 | 5.9 | 92  | 10.5 | 10.3 | 0.8 | 0.8 |
| 64 F | 158.3 | 63.2  | 25.22 | 31.3 | 92.5  | 185 | 86  | 119   | 67 | 43.5 | 7.2 | 4.4 | 1.6 | 0.6 | 21  | 15 | 17  | 152 | 171 | 112 | 47  | 101.6 | 5.6 | 60.2 | 462 | 13.9 | 43.5 | 18.8 | 235 | 12.8 | 0.44 | 145 | 3.6 | 107 | 9.2 | 5   | 56  | 9.3  | 7.9  | 0.9 | 0.8 |
| 69 M | 164.5 | 68.8  | 25.42 | 23   | 88    | 139 | 92  | 107.7 | 82 | 4.7  | 7.5 | 4.4 | 1.4 | 0.8 | 21  | 38 | 35  | 164 | 183 | 139 | 40  | 115.2 | 5.4 | 70.1 | 501 | 14.6 | 43.9 | 23.5 | 265 | 11.9 | 0.76 | 141 | 4.3 | 105 | 9.1 | 5.2 | 80  | 14.8 | 12.8 | 0.9 | 0.8 |
| 66 F | 153.3 | 52.4  | 22.3  | 29.1 | 78    | 123 | 73  | 89.67 | 63 | 36.5 | 7.2 | 4.5 | 1.7 | 1.1 | 24  | 16 | 19  | 332 | 135 | 35  | 55  | 73    | 5   | 42.3 | 474 | 14   | 42.9 | 18.2 | 218 | 15.5 | 0.5  | 141 | 4   | 104 | 9.3 | 4.4 | 48  | 12.8 | 13.1 | 0.8 | 1   |
| 29 M | 183.2 | 171.6 | 51.13 | 40.2 | 146   | 142 | 97  | 112   | 67 | 8.1  | 7   | 4.3 | 1.6 | 0.5 | 33  | 62 | 29  | 243 | 150 | 122 | 44  | 81.6  | 5.6 | 74.1 | 512 | 15.1 | 45.6 | 26.6 | 306 | 11.3 | 0.64 | 140 | 3.9 | 105 | 9   | 6   | 54  | 15.7 | 14.6 | 0.7 | 0.6 |
| 58 M | 167.9 | 68.4  | 24.26 | 22.6 | 81.5  | 120 | 74  | 89.33 | 65 | 9.8  | 7.7 | 4.4 | 1.3 | 0.9 | 19  | 32 | 117 | 245 | 174 | 104 | 42  | 111.2 | 5.8 | 56.8 | 496 | 15   | 45.3 | 27.2 | 375 | 15.6 | 0.85 | 140 | 4.5 | 103 | 9.4 | 5.7 | 104 | 7.8  | 9.4  | 0.7 | 0.5 |
| 76 M | 161.7 | 59.7  | 22.83 | 21.1 | 77.5  | 116 | 65  | 82    | 67 | 28.4 | 7.1 | 4   | 1.3 | 0.6 | 20  | 14 | 14  | 216 | 192 | 66  | 44  | 134.8 | 5.2 | 68.5 | 464 | 14.5 | 44.2 | 18.7 | 316 | 17.1 | 1.04 | 140 | 4.6 | 106 | 8.6 | 5.1 | 87  | 9.4  | 9.7  | 1   | 1.1 |
| 60 M | 161.3 | 66.2  | 25.44 | 26.2 | 85    | 133 | 81  | 98.33 | 67 | 6.3  | 7.8 | 4.5 | 1.4 | 0.9 | 54  | 51 | 133 | 220 | 239 | 237 | 53  | 138.6 | 5.7 | 75.4 | 473 | 15.3 | 46.2 | 20.1 | 296 | 14.2 | 0.75 | 142 | 4.2 | 105 | 9.6 | 7.4 | 47  | 14.2 | 14.2 | 1.3 | 1.5 |
| 55 M | 169.7 | 84.4  | 29.31 | 35.2 | 99    | 128 | 85  | 99.33 | 64 | 12.1 | 7.3 | 4.6 | 1.7 | 0.9 | 22  | 25 | 183 | 309 | 293 | 235 | 67  | 179   | 5.3 | 93.7 | 511 | 14.9 | 45.1 | 23.8 | 257 | 13.2 | 0.86 | 141 | 3.9 | 105 | 9.5 | 7.7 | 40  | 17.6 | 14.4 | 0.9 | 0.7 |
| 58 F | 155.5 | 71.4  | 29.53 | 35.6 | 93.5  | 142 | 88  | 106   | 67 | 49.8 | 7.6 | 4.8 | 1.7 | 1   | 18  | 15 | 21  | 216 | 231 | 88  | 70  | 143.4 | 4.9 | 53.7 | 478 | 14.2 | 41.9 | 26.3 | 257 | 15.2 | 0.68 | 142 | 4   | 105 | 9.7 | 5.2 | 78  | 10   | 12.7 | 0.7 | 1   |
| 57 F | 149.9 | 53.4  | 23.77 | 31.7 | 79.5  | 152 | 76  | 101.3 | 89 | 98.3 | 7.4 | 4.6 | 1.6 | 1.6 | 13  | 19 | 49  | 336 | 209 | 70  | 87  | 108   | 5.2 | 100  | 584 | 17.9 | 53.4 | 14.4 | 316 | 11.1 | 0.91 | 141 | 4.4 | 103 | 9.5 | 6   | 78  | 16.5 | 16.6 | 0.7 | 0.5 |
| 72 M | 162.8 | 59.8  | 22.56 | 25   | 79    | 150 | 94  | 112.7 | 72 | 54.5 | 7.2 | 4.1 | 1.3 | 0.9 | 20  | 22 | 37  | 219 | 213 | 63  | 70  | 120   | 5.1 | 57.5 | 514 | 15.4 | 46.3 | 21   | 296 | 16.6 | 1.13 | 141 | 3.9 | 105 | 9.2 | 5.1 | 109 | 14.4 | 14.2 | 0.8 | 1.2 |
| 44 F | 154.5 | 47    | 19.69 | 20.3 | 67    | 103 | 54  | 70.33 | 62 | 14.7 | 7   | 4.3 | 1.6 | 0.6 | 29  | 22 | 16  | 110 | 190 | 52  | 85  | 80    | 4.9 | 62.2 | 385 | 11.8 | 35.7 | 27.1 | 225 | 19.5 | 0.57 | 144 | 3.3 | 107 | 8.9 | 2.7 | 81  | 11.9 | 11.5 | 0.6 | 0.6 |
| 75 M | 153.1 | 53.5  | 22.82 | 16.1 | 81.5  | 138 | 78  | 98    | 52 | 23.7 | 6.9 | 4.1 | 1.5 | 0.6 | 28  | 23 | 72  | 397 | 249 | 81  | 116 | 110   | 5.6 | 41.2 | 435 | 14   | 43.2 | 28.3 | 306 | 13   | 0.66 | 142 | 4.4 | 102 | 9.1 | 3.5 | 110 | 7.6  | 9.4  | 0.7 | 0.8 |
| 64 M | 170.5 | 61    | 20.98 | 21.5 | 82    | 132 | 73  | 92.67 | 63 | 50   | 7.5 | 4.4 | 1.4 | 1.9 | 112 | 74 | 548 | 235 | 227 | 126 | 61  | 153   | 4.9 | 74.3 | 493 | 16.8 | 50.6 | 24.6 | 322 | 7.7  | 0.73 | 142 | 4.3 | 103 | 9.7 | 6.8 | 94  | 20.3 | 17.5 | 0.7 | 0.8 |
| 57 M | 167.9 | 58.8  | 20.86 | 21.3 | 69    | 129 | 75  | 93    | 43 | 19.6 | 7.5 | 4.8 | 1.8 | 0.6 | 30  | 19 | 17  | 203 | 196 | 37  | 93  | 78    | 5.1 | 42   | 451 | 13.6 | 41.8 | 15.7 | 225 | 18.2 | 0.93 | 139 | 4.3 | 101 | 9.4 | 5.9 | 116 | 8    | 7.7  | 0.6 | 0.6 |
| 57 F | 157.3 | 59.4  | 24.01 | 32.3 | 85    | 120 | 69  | 86    | 59 | 10.4 | 7.5 | 4.3 | 1.3 | 0.5 | 26  | 24 | 76  | 190 | 260 | 87  | 54  | 80    | 5.3 | 45   | 439 | 12.5 | 38.6 | 30.2 | 269 | 14.4 | 0.62 | 140 | 4   | 103 | 9.2 | 4   | 78  | 8.8  | 7.9  | 0.7 | 0.9 |
| 52 M | 165.2 | 57.1  | 20.92 | 16.3 | 72    | 161 | 105 | 123.7 | 65 | 9.9  | 6.4 | 4   | 1.7 | 0.7 | 16  | 23 | 47  | 177 | 209 | 62  | 48  | 153   | 4.9 | 70.7 | 539 | 16.5 | 49.4 | 25.7 | 277 | 15   | 0.72 | 143 | 4.2 | 107 | 9   | 5.2 | 102 | 10.1 | 11.3 | 0.7 | 0.7 |
| 82 F | 137.7 | 42.9  | 22.63 | 32.6 | 89.5  | 154 | 84  | 107.3 | 67 | 15.1 | 7.8 | 4.3 | 1.2 | 0.8 | 23  | 16 | 19  | 275 | 216 | 103 | 64  | 117   | 5.4 | 54.3 | 466 | 14.5 | 43.9 | 23.3 | 340 | 16.6 | 0.61 | 142 | 4.6 | 104 | 10  | 5.1 | 92  | 10.5 | 12   | 0.7 | 0.6 |
| 58 M | 159.9 | 71.7  | 28.04 | 29.4 | 99    | 149 | 98  | 115   | 98 | 147  | 6.7 | 4.1 | 1.6 | 0.4 | 44  | 61 | 592 | 290 | 244 | 274 | 52  | 124   | 6.8 | 91.5 | 517 | 16.8 | 49.7 | 21.4 | 296 | 15.1 | 0.57 | 137 | 4.1 | 102 | 9   | 7.2 | 60  | 15.1 | 15.1 | 1.2 | 0.8 |
| 54 M | 162.5 | 52.5  | 19.88 | 14.4 | 71.5  | 144 | 91  | 108.7 | 66 | 6.8  | 7.2 | 4.4 | 1.6 | 0.9 | 16  | 25 | 34  | 204 | 191 | 76  | 67  | 109   | 5.3 | 40.5 | 505 | 15.1 | 45.2 | 5.2  | 291 | 13.3 | 1.03 | 141 | 3.8 | 100 | 9.4 | 5.9 | 74  | 9.9  | 11.3 | 0.6 | 0.5 |
| 63 M | 163   | 50.2  | 18.89 | 18.6 | 68    | 110 | 69  | 82.67 | 53 | 34.1 | 7.1 | 4.2 | 1.4 | 1.5 | 29  | 26 | 67  | 169 | 207 | 54  | 79  | 108   | 5.1 | 60.5 | 462 | 14.2 | 44.1 | 18   | 265 | 14.6 | 0.92 | 143 | 4.1 | 105 | 8.8 | 5.6 | 64  | 12.5 | 13.2 | 0.6 | 1   |
| 52 M | 169.7 | 87.4  | 30.35 | 35.2 | 104.5 | 126 | 76  | 92.67 | 72 | 7.1  | 7.3 | 4.3 | 1.4 | 0.6 | 73  | 84 | 53  | 264 | 207 | 166 | 41  | 156   | 4.9 | 91.3 | 458 | 15.3 | 44.7 | 22.8 | 340 | 12.3 | 0.8  | 141 | 4.3 | 103 | 9.5 | 4.8 | 63  | 16   | 11.5 | 0.6 | 0.6 |
| 50 M | 164.5 | 60.8  | 22.47 | 24.5 | 80.5  | 123 | 67  | 85.67 | 55 | 15.9 | 6.7 | 4.1 | 1.6 | 0.8 | 18  | 18 | 28  | 189 | 191 | 122 | 56  | 123   | 4.7 | 98.3 | 520 | 16.2 | 45.8 | 23.6 | 360 | 14.2 | 0.96 | 145 | 4.1 | 105 | 9.3 | 8.6 | 82  | 20.3 | 20.6 | 0.6 | 0.7 |
| 65 M | 170.9 | 76.1  | 26.06 | 24.7 | 87    | 165 | 88  | 113.7 | 57 | 33.8 | 7.3 | 4.3 | 1.4 | 1.2 | 25  | 19 | 42  | 203 | 226 | 101 | 58  | 147   | 5   | 60.8 | 484 | 15.8 | 46.4 | 22.3 | 282 | 16   | 1.08 | 139 | 3.9 | 100 | 9.3 | 5.4 | 82  | 8.2  | 10.2 | 1.2 | 0.8 |
| 41 M | 166.5 | 60.1  | 21.68 | 21.3 | 76.5  | 113 | 75  | 87.67 | 66 | 8.1  | 6.7 | 4.4 | 1.9 | 0.4 | 12  | 15 | 14  | 198 | 173 | 102 | 53  | 101   | 5.2 | 74.3 | 533 | 15.7 | 46.5 | 29.1 | 261 | 13.9 | 0.85 | 142 | 4.1 | 104 | 9.5 | 6.2 | 56  | 13.1 | 12.3 | 0.6 | 0.7 |
| 81 M | 170.5 | 64.9  | 22.33 | 17.9 | 78    | 137 | 75  | 95.67 | 49 | 96.7 | 7.6 | 4.3 | 1.3 | 0.9 | 31  | 23 | 15  | 233 | 180 | 79  | 44  | 116   | 4.8 | 49.6 | 418 | 13.2 | 40.4 | 19.7 | 277 | 19.5 | 0.99 | 138 | 4.3 | 104 | 8.9 | 6   | 74  | 7.6  | 7    | 1.2 | 0.7 |
| 46 F | 149.7 | 62.8  | 28.02 | 40.4 | 87.5  | 108 | 62  | 77.33 | 59 | 5.2  | 7.5 | 4.6 | 1.6 | 0.6 | 19  | 23 | 31  | 139 | 245 | 103 | 69  | 157   | 5.2 | 56.4 | 506 | 14   | 41   | 35.2 | 200 | 10.5 | 0.41 | 139 | 4   | 105 | 9.6 | 4.4 | 68  | 14.6 | 15.1 | 0.5 | 0.5 |
| 44 M | 168.8 | 69.3  | 24.32 | 27.4 | 83    | 127 | 71  | 89.67 | 54 | 5.5  | 7.6 | 4.7 | 1.6 | 0.8 | 46  | 86 | 252 | 195 | 286 | 122 | 63  | 203   | 5.4 | 63   | 450 | 14.3 | 43.3 | 35.6 | 202 | 20.4 | 0.76 | 139 | 4.5 | 105 | 9.6 | 7   | 80  | 16.5 | 14.3 | 0.6 | 0.8 |
| 47 M | 163.7 | 67    | 25    | 21.8 | 82.5  | 135 | 85  | 101.7 | 55 | 13.9 | 7.4 | 4.6 | 1.7 | 1   | 24  | 32 | 85  | 227 | 212 | 387 | 62  | 105   | 5.1 | 75.4 | 485 | 14.6 | 42.8 | 16.9 | 265 | 10.3 | 0.83 | 143 | 3.7 | 105 | 9.3 | 5.6 | 57  | 17.2 | 15.8 | 0.5 | 0.6 |
| 56 M | 167   | 65.2  | 23.38 | 25.5 | 79.5  | 138 | 92  | 107.3 | 68 | 10.6 | 7   | 4.1 | 1.4 | 0.9 | 24  | 23 | 125 | 213 | 228 | 172 | 98  | 109   | 5.2 | 56.5 | 501 | 15.5 | 46   | 23.9 | 282 | 13   | 0.67 | 140 | 4.4 | 105 | 9.1 | 8.7 | 57  | 13.7 | 10.7 | 0.7 | 0.6 |
| 53 F | 153.7 | 55    | 23.28 | 30.6 | 82.5  | 102 | 61  | 74.67 | 57 | 8.5  | 6.9 | 4.3 | 1.7 | 0.5 | 38  | 33 | 16  | 360 | 228 | 41  | 74  | 134   | 5.1 | 52.3 | 460 | 13.4 | 42   | 27.1 | 241 | 13.2 | 0.5  | 141 | 4.1 |     |     |     |     |      |      |     |     |

|      |       |      |       |      |      |     |    |       |    |      |     |     |     |     |    |    |     |     |     |     |    |     |     |      |     |      |      |      |     |      |      |     |     |     |     |     |     |      |        |     |     |
|------|-------|------|-------|------|------|-----|----|-------|----|------|-----|-----|-----|-----|----|----|-----|-----|-----|-----|----|-----|-----|------|-----|------|------|------|-----|------|------|-----|-----|-----|-----|-----|-----|------|--------|-----|-----|
| 61 F | 147.1 | 55.4 | 25.6  | 37   | 75.5 | 148 | 91 | 110   | 69 | 36.2 | 8   | 4.9 | 1.6 | 1   | 22 | 19 | 29  | 176 | 199 | 90  | 63 | 109 | 5.4 | 49.9 | 524 | 15.5 | 46.6 | 16.5 | 296 | 17.2 | 0.69 | 143 | 4   | 102 | 9.5 | 6.3 | 80  | 14.8 | 13.9   | 0.7 | 0.7 |
| 37 M | 173.7 | 76.4 | 25.32 | 30.4 | 86.5 | 143 | 85 | 104.3 | 57 | 6.9  | 7.2 | 4.7 | 1.9 | 0.4 | 21 | 22 | 60  | 207 | 200 | 208 | 47 | 121 | 5   | 71.5 | 514 | 15.5 | 45.5 | 20.8 | 286 | 9.2  | 0.77 | 143 | 3.9 | 102 | 9.6 | 8.8 | 55  | 11.8 | 9      | 0.7 | 0.7 |
| 64 M | 167.1 | 62.5 | 22.38 | 17.1 | 85.2 | 132 | 86 | 101.3 | 67 | 30.9 | 7.2 | 4.2 | 1.4 | 0.6 | 27 | 28 | 48  | 333 | 238 | 90  | 57 | 163 | 7.3 | 67.7 | 482 | 13.7 | 41.1 | 23.6 | 393 | 27.4 | 1.43 | 140 | 4.1 | 104 | 9.4 | 5.3 | 8.5 | 8    | 1.3    | 0.7 |     |
| 56 M | 160.9 | 54.5 | 21.05 | 19.8 | 72.5 | 118 | 64 | 82    | 62 | 19.9 | 7   | 4.2 | 1.5 | 0.9 | 20 | 27 | 34  | 252 | 167 | 103 | 43 | 104 | 5.4 | 64.2 | 494 | 15.5 | 45.6 | 18.9 | 316 | 19.6 | 0.82 | 143 | 4.3 | 109 | 8.7 | 5.1 | 66  | 12.2 | 10.5   | 0.6 | 0.6 |
| 64 F | 140.5 | 43.4 | 21.99 | 26.7 | 80.5 | 140 | 87 | 104.7 | 94 | 20.5 | 8.2 | 4.5 | 1.2 | 0.5 | 32 | 28 | 33  | 233 | 208 | 135 | 50 | 128 | 5   | 69.9 | 450 | 13.9 | 41.5 | 22.5 | 286 | 12   | 0.64 | 143 | 4.2 | 106 | 9.3 | 4.9 | 91  | 15   | 12.4   | 0.6 | 0.5 |
| 71 M | 159.5 | 62.7 | 24.65 | 22.4 | 83.5 | 161 | 94 | 116.3 | 53 | 53.4 | 6.9 | 3.9 | 1.3 | 0.8 | 22 | 18 | 30  | 232 | 161 | 88  | 54 | 88  | 5.1 | 58.2 | 447 | 14.5 | 42.8 | 22.6 | 306 | 12.2 | 0.89 | 144 | 4.1 | 108 | 8.9 | 6   | 66  | 12.7 | 12.7   | 0.9 | 0.8 |
| 65 M | 159.7 | 59.1 | 23.17 | 25.1 | 83.5 | 141 | 77 | 98.33 | 61 | 22.3 | 7.4 | 4.2 | 1.3 | 1.5 | 25 | 31 | 50  | 327 | 196 | 87  | 63 | 111 | 7.7 | 64   | 603 | 19.2 | 56.6 | 21.2 | 250 | 14.9 | 0.79 | 141 | 4.1 | 103 | 9.1 | 5.2 | 77  | 15.4 | 13.4   | 0.6 | 0.6 |
| 78 F | 146.9 | 52.8 | 24.47 | 30.3 | 83.5 | 194 | 97 | 129.3 | 67 | 17.8 | 7.4 | 4.3 | 1.4 | 1.1 | 25 | 18 | 23  | 436 | 220 | 163 | 55 | 127 | 4.7 | 64.9 | 457 | 14.5 | 41.7 | 23   | 328 | 15.6 | 0.9  | 141 | 4.5 | 105 | 9.4 | 4.7 | 89  | 7.9  | 7.6    | 1   | 0.9 |
| 82 M | 155   | 55.4 | 23.06 | 16.8 | 74   | 101 | 66 | 77.67 | 59 | 239  | 7.9 | 4.4 | 1.3 | 0.7 | 34 | 20 | 71  | 156 | 180 | 33  | 80 | 84  | 5.5 | 52   | 393 | 12.4 | 37   | 20.3 | 273 | 18.3 | 1.2  | 138 | 3.6 | 101 | 9.4 | 8.1 | 155 | 7.8  | 7.6    | 0.7 | 0.7 |
| 69 M | 165.9 | 54.9 | 19.95 | 13.6 | 67   | 127 | 72 | 90.33 | 53 | 52.9 | 7.1 | 4.2 | 1.5 | 0.7 | 33 | 42 | 34  | 223 | 176 | 62  | 61 | 100 | 5.2 | 46.2 | 464 | 14   | 41.5 | 21.5 | 241 | 13.1 | 0.77 | 142 | 4.2 | 104 | 8.7 | 4.2 | 116 | 9.8  | 10.7   | 0.7 | 0.6 |
| 63 F | 156.9 | 56.1 | 22.79 | 29.4 | 84   | 136 | 72 | 93.33 | 74 | 8.5  | 7.8 | 4.5 | 1.4 | 0.6 | 20 | 17 | 18  | 251 | 202 | 126 | 55 | 124 | 5.3 | 62.3 | 482 | 14.2 | 41.8 | 28.5 | 353 | 13   | 0.71 | 143 | 4.4 | 104 | 9.5 | 5.3 | 52  | 11.9 | 11.8   | 0.9 | 0.8 |
| 79 M | 170.4 | 58.2 | 20.04 | 13.9 | 76   | 145 | 85 | 105   | 70 | 13.1 | 7.1 | 4.3 | 1.5 | 0.8 | 15 | 15 | 26  | 179 | 181 | 46  | 79 | 79  | 6.7 | 43   | 461 | 12.9 | 39   | 15.7 | 227 | 21.1 | 0.85 | 143 | 4.4 | 105 | 9   | 5.3 | 52  | 9.4  | 9.6    | 0.6 | 0.6 |
| 52 M | 154.5 | 49   | 20.53 | 15.6 | 62.5 | 114 | 72 | 86    | 94 | 12.7 | 7.1 | 4.3 | 1.5 | 0.7 | 15 | 16 | 129 | 249 | 243 | 158 | 57 | 151 | 5   | 72.7 | 466 | 14.5 | 44.1 | 25.4 | 282 | 12.9 | 0.71 | 144 | 4.2 | 106 | 9.6 | 5.3 | 61  | 15.9 | 12     | 0.6 | 0.8 |
| 48 F | 156.9 | 65.4 | 26.57 | 33.9 | 87.5 | 106 | 59 | 74.67 | 63 | 12   | 7.6 | 4.5 | 1.5 | 0.7 | 16 | 15 | 15  | 163 | 248 | 81  | 56 | 174 | 5.5 | 59.1 | 431 | 12.3 | 37.2 | 31.8 | 296 | 14.4 | 0.61 | 141 | 4.2 | 105 | 9.5 | 4   | 56  | 13.8 | 10.2   | 0.7 | 0.8 |
| 66 M | 162.1 | 83.8 | 31.89 | 29.9 | 107  | 127 | 88 | 101   | 73 | 15.7 | 7.1 | 4.4 | 1.6 | 0.5 | 39 | 51 | 115 | 146 | 185 | 88  | 63 | 99  | 5.1 | 65.5 | 498 | 15.9 | 46.7 | 21   | 230 | 21.6 | 1.04 | 142 | 4   | 106 | 8.8 | 6.2 | 60  | 14.5 | 11.7   | 1.3 | 0.7 |
| 59 M | 160.7 | 75.1 | 29.08 | 36   | 90.5 | 145 | 85 | 105   | 85 | 17.1 | 7.3 | 4.6 | 1.7 | 1.1 | 27 | 36 | 144 | 173 | 240 | 165 | 48 | 161 | 5.8 | 66.7 | 502 | 16.6 | 47.9 | 20.5 | 222 | 12.6 | 0.75 | 143 | 3.9 | 106 | 9.4 | 5.2 | 62  | 15.7 | 17.9   | 0.7 | 0.6 |
| 69 F | 153.7 | 54.2 | 22.94 | 30.9 | 76.5 | 124 | 70 | 88    | 56 | 20.4 | 7.1 | 4.2 | 1.4 | 1.7 | 34 | 21 | 15  | 180 | 183 | 118 | 47 | 117 | 5.9 | 59   | 459 | 13.3 | 39.7 | 25.9 | 254 | 12.3 | 0.61 | 143 | 4.2 | 109 | 9.1 | 4.5 | 71  | 10.9 | 10.9   | 0.7 | 0.9 |
| 69 F | 151.3 | 51.7 | 22.58 | 29.6 | 83   | 111 | 67 | 81.67 | 60 | 15   | 7.2 | 4.6 | 1.8 | 0.8 | 21 | 18 | 13  | 225 | 232 | 87  | 73 | 115 | 5.7 | 44.2 | 437 | 13.3 | 38.9 | 17.7 | 300 | 14.9 | 0.69 | 142 | 3.9 | 104 | 9.7 | 4.8 | 98  | 12.1 | 12.5   | 0.6 | 0.8 |
| 70 M | 169.2 | 73.2 | 25.57 | 22.7 | 90.5 | 162 | 90 | 114   | 59 | 29.2 | 7.1 | 4   | 1.3 | 1.4 | 21 | 17 | 32  | 244 | 204 | 81  | 53 | 133 | 4.8 | 94.3 | 494 | 14.9 | 44.6 | 17.1 | 244 | 20.3 | 1.01 | 143 | 4   | 105 | 8.8 | 8.3 | 87  | 11.1 | 12.4   | 0.8 | 0.8 |
| 79 M | 165.2 | 50.3 | 18.43 | 9.5  | 64   | 117 | 63 | 81    | 68 | 61.9 | 7.2 | 4.4 | 1.6 | 0.9 | 23 | 19 | 31  | 209 | 199 | 76  | 71 | 97  | 5.7 | 38.6 | 438 | 13.3 | 40.5 | 16.7 | 265 | 20.5 | 0.96 | 138 | 3.7 | 100 | 9.1 | 5.3 | 96  | 12.7 | 13.4   | 0.7 | 1   |
| 75 F | 154.3 | 49.6 | 20.83 | 25.4 | 65   | 120 | 62 | 81.33 | 47 | 156  | 7.9 | 4.4 | 1.3 | 0.8 | 27 | 38 | 46  | 220 | 174 | 144 | 34 | 103 | 5.4 | 58.1 | 385 | 12.5 | 37.2 | 13.5 | 233 | 19.2 | 0.84 | 139 | 4   | 100 | 9.2 | 8.4 | 97  | 13.1 | 12.5   | 0.6 | 0.8 |
| 63 F | 160   | 59.8 | 23.36 | 31.7 | 85.5 | 136 | 90 | 105.3 | 82 | 16.1 | 7.7 | 4.7 | 1.6 | 0.7 | 21 | 24 | 16  | 267 | 221 | 83  | 48 | 156 | 5.5 | 46.7 | 440 | 13.1 | 39.7 | 26.3 | 291 | 11.8 | 0.53 | 140 | 4   | 105 | 9.5 | 4.9 | 54  | 14.3 | 13.3   | 0.8 | 1   |
| 80 M | 150.9 | 61   | 26.79 | 20.3 | 88.5 | 139 | 83 | 101.7 | 52 | 43   | 6.6 | 4.1 | 1.6 | 0.8 | 17 | 15 | 15  | 246 | 141 | 55  | 52 | 77  | 5.2 | 43.3 | 470 | 14.7 | 43.2 | 17.4 | 254 | 17.9 | 0.82 | 141 | 4.1 | 107 | 8.9 | 6.9 | 63  | 11.2 | 9.7    | 1.2 | 1.4 |
| 63 F | 160.5 | 51.4 | 19.95 | 22.8 | 71   | 130 | 80 | 96.67 | 60 | 22.5 | 6.7 | 4.4 | 1.9 | 0.8 | 17 | 13 | 16  | 168 | 195 | 52  | 69 | 98  | 5.9 | 56.9 | 366 | 11.5 | 34.9 | 21.2 | 282 | 12.2 | 0.69 | 139 | 4.2 | 103 | 9.3 | 3.5 | 75  | 15.6 | 13.2   | 0.8 | 0.8 |
| 66 M | 168.1 | 57.4 | 20.31 | 8.2  | 72.5 | 120 | 70 | 86.67 | 61 | 32.3 | 4.6 | 2.6 | 1.3 | 0.6 | 29 | 25 | 30  | 181 | 163 | 59  | 50 | 94  | 4.3 | 59   | 455 | 14   | 40.8 | 24.8 | 277 | 21.6 | 0.77 | 139 | 4.2 | 105 | 7.9 | 5.8 | 124 | 11.5 | 11.7   | 0.9 | 1.3 |
| 61 F | 154.9 | 57.7 | 24.05 | 21.7 | 93   | 143 | 80 | 101   | 65 | 32.7 | 7   | 4.4 | 1.7 | 0.8 | 17 | 16 | 29  | 382 | 227 | 247 | 39 | 145 | 5.4 | 47.9 | 422 | 12.7 | 37.8 | 20   | 235 | 8.1  | 0.61 | 141 | 4.3 | 103 | 9.3 | 4.3 | 87  | 10.2 | 10.1   | 1.3 | 0.8 |
| 61 M | 171.9 | 64.1 | 21.69 | 20   | 76.5 | 137 | 74 | 95    | 60 | 22.7 | 7.5 | 4.5 | 1.5 | 0.6 | 23 | 21 | 230 | 353 | 218 | 206 | 42 | 121 | 7   | 66.8 | 505 | 15.6 | 45.7 | 24.7 | 334 | 13   | 0.73 | 138 | 4.4 | 99  | 9.9 | 7.5 | 72  | 11.7 | 13     | 3.2 | 1.6 |
| 81 F | 153   | 56.6 | 24.18 | 31.7 | 95.5 | 131 | 66 | 87.67 | 63 | 75.2 | 7.3 | 4.1 | 1.3 | 0.7 | 25 | 19 | 24  | 155 | 201 | 121 | 76 | 86  | 5.5 | 74.3 | 469 | 14.3 | 43.1 | 24.1 | 334 | 21.6 | 0.75 | 142 | 3.7 | 104 | 9.4 | 3.4 | 66  | 14.4 | 15     | 0.7 | 0.8 |
| 57 M | 172.1 | 72.5 | 24.48 | 22.1 | 90.5 | 107 | 63 | 77.67 | 58 | 12.5 | 7.2 | 4.7 | 1.9 | 1.4 | 42 | 85 | 106 | 237 | 212 | 142 | 57 | 132 | 5.2 | 73   | 472 | 14.8 | 44.4 | 21.5 | 220 | 11.8 | 0.76 | 141 | 4.3 | 103 | 9.6 | 6   | 78  | 10.8 | 13.3   | 0.8 | 0.7 |
| 74 M | 167   | 56.5 | 20.26 | 14.3 | 73   | 127 | 80 | 95.67 | 65 | 17.2 | 7.2 | 4   | 1.3 | 0.6 | 19 | 10 | 13  | 234 | 218 | 111 | 50 | 132 | 5.6 | 61.5 | 442 | 13   | 40.3 | 20.5 | 269 | 25.9 | 0.77 | 141 | 4   | 103 | 8.9 | 5   | 99  | 10.1 | 11.2   | 2.2 | 1   |
| 82 F | 145   | 37.6 | 17.88 | 19.1 | 56.5 | 140 | 66 | 90.67 | 65 | 46.6 | 7.4 | 4.5 | 1.5 | 1   | 28 | 20 | 17  | 315 | 209 | 60  | 81 | 105 | 5.3 | 48.2 | 424 | 13.3 | 39.3 | 20   | 316 | 14.5 | 0.58 | 144 | 3.8 | 101 | 9   | 3   | 89  | 11   | 11.7   | 1.1 | 1.1 |
| 59 M | 169.6 | 61.1 | 21.24 | 19.1 | 73.5 | 146 | 92 | 110   | 66 | 10.4 | 6.3 | 4.1 | 1.8 | 0.5 | 16 | 13 | 23  | 307 | 236 | 143 | 56 | 152 | 5.2 | 66.2 | 496 | 15.8 | 47.1 | 21.4 | 286 | 12.8 | 0.98 | 139 | 4   | 100 | 9   | 5.2 | 88  | 7.9  | 8.1    | 0.8 | 0.6 |
| 57 F | 153.9 | 55.7 | 23.52 | 30.4 | 81   | 105 | 57 | 73    | 60 | 11.4 | 7.5 | 4.2 | 1.3 | 0.7 | 20 | 23 | 22  | 203 | 204 | 157 | 43 | 127 | 4.9 | 66.3 | 410 | 12   | 35.3 | 20.9 | 322 | 11.6 | 0.54 | 141 | 3.9 | 102 | 9.4 | 5.2 | 119 | 10.4 | 12.4   | 0.5 | 0.6 |
| 66 M | 161.7 | 52.6 | 20.12 | 16.9 | 68.5 | 116 | 70 | 85.33 | 63 | 16   | 7.7 | 4.5 | 1.4 | 0.8 | 27 | 19 | 63  | 172 | 201 | 58  | 81 | 95  | 5.5 | 41.6 | 424 | 14.7 | 44.3 | 22.2 | 286 | 16.3 | 0.72 | 141 | 4.3 | 99  | 9.7 | 6.7 | 95  | 10.7 | 10.5   | 1.8 | 2.8 |
| 51 M | 170.3 | 68.5 | 23.62 | 20.6 | 81   | 145 | 93 | 110.3 | 66 | 8.5  | 7.6 | 4.6 | 1.5 | 0.7 | 43 | 56 | 132 | 203 | 263 | 346 | 64 | 135 | 5.7 | 42.1 | 535 | 16.7 | 48   | 14.4 | 193 | 17.5 | 0.8  | 140 | 4.2 | 100 | 9.6 | 5.7 | 67  | 9.8  | 9.3    | 0.6 | 0.6 |
| 52 M | 166.9 | 60.4 | 21.68 | 22.2 | 74   | 122 | 77 | 92    | 72 | 13.3 | 8.1 | 4.7 | 1.4 | 0.7 | 33 | 35 | 26  | 210 | 299 | 106 | 58 | 201 | 5.1 | 56.3 | 480 | 16.1 | 44.4 | 18.6 | 347 | 12.3 | 0.82 | 137 | 4.3 | 101 | 9.7 | 6.9 | 171 | 13.3 | 12.8</ |     |     |

|      |       |      |       |      |      |     |    |       |     |       |     |     |     |     |    |    |     |     |     |     |    |     |     |       |     |      |      |      |     |      |      |     |     |     |     |     |     |      |      |     |     |
|------|-------|------|-------|------|------|-----|----|-------|-----|-------|-----|-----|-----|-----|----|----|-----|-----|-----|-----|----|-----|-----|-------|-----|------|------|------|-----|------|------|-----|-----|-----|-----|-----|-----|------|------|-----|-----|
| 73 F | 158.4 | 72.9 | 29.05 | 44.5 | 98   | 141 | 74 | 96.33 | 72  | 11.2  | 7.8 | 4.4 | 1.3 | 0.6 | 23 | 26 | 31  | 309 | 270 | 130 | 63 | 186 | 5.5 | 102.8 | 419 | 12.9 | 39.2 | 38.1 | 318 | 17.2 | 0.56 | 141 | 4   | 102 | 9.5 | 6   | 87  | 13.5 | 12.5 | 0.8 | 0.8 |
| 72 F | 146.6 | 58.6 | 27.27 | 36.7 | 86   | 124 | 49 | 74    | 85  | 146   | 7   | 3.9 | 1.3 | 0.5 | 21 | 17 | 26  | 271 | 223 | 41  | 62 | 134 | 5.7 | 52.4  | 392 | 13.1 | 38.7 | 20.9 | 324 | 17.5 | 0.38 | 142 | 3.9 | 105 | 8.9 | 3.5 | 71  | 12.1 | 11.5 | 0.8 | 1   |
| 61 M | 161.7 | 61.9 | 23.67 | 23.4 | 80.5 | 123 | 76 | 91.67 | 56  | 12.7  | 7.2 | 4.4 | 1.6 | 0.5 | 24 | 23 | 71  | 246 | 207 | 100 | 55 | 124 | 5.3 | 61.5  | 491 | 15.9 | 46.6 | 19.1 | 244 | 16.1 | 0.82 | 140 | 4.2 | 99  | 9.6 | 6.3 | 46  | 12.2 | 11.7 | 0.6 | 0.7 |
| 63 M | 161.7 | 60.4 | 23.1  | 21.6 | 78.5 | 155 | 85 | 108.3 | 60  | 18.2  | 7.5 | 4.8 | 1.8 | 0.6 | 22 | 20 | 77  | 149 | 219 | 93  | 64 | 123 | 5.9 | 93.9  | 474 | 15   | 45   | 305  | 318 | 15   | 0.65 | 138 | 4.5 | 99  | 9.6 | 5.8 | 64  | 13   | 12.5 | 0.8 | 1.8 |
| 69 M | 162.1 | 49.2 | 18.72 | 10.8 | 63.5 | 126 | 69 | 88    | 61  | 43.3  | 7.3 | 4.7 | 1.8 | 1.7 | 65 | 47 | 24  | 202 | 247 | 115 | 76 | 129 | 6.2 | 45.8  | 439 | 14.3 | 42.1 | 14.4 | 345 | 13.7 | 0.72 | 137 | 4   | 96  | 9.4 | 3.1 | 100 | 14   | 18.1 | 0.6 | 1.6 |
| 70 F | 142.9 | 46.4 | 22.72 | 28.2 | 72   | 147 | 75 | 99    | 59  | 339   | 8   | 4   | 1   | 1.3 | 52 | 46 | 122 | 165 | 189 | 104 | 59 | 110 | 5.5 | 75.8  | 516 | 15.8 | 48.1 | 16   | 254 | 16.1 | 0.77 | 142 | 4.2 | 104 | 9.4 | 5.9 | 118 | 15.8 | 16.8 | 0.9 | 1   |
| 76 M | 159   | 51   | 20.17 | 20.1 | 68   | 125 | 67 | 86.33 | 83  | 17.2  | 7.8 | 4.5 | 1.4 | 0.7 | 37 | 34 | 25  | 273 | 203 | 125 | 60 | 117 | 4.8 | 54.6  | 478 | 14.6 | 44.2 | 20.9 | 258 | 16.4 | 0.37 | 140 | 4.2 | 99  | 9   | 5.6 | 110 | 12   | 11.5 | 1.1 | 1.7 |
| 72 F | 150.8 | 36.9 | 16.23 | 16.4 | 59   | 126 | 67 | 86.67 | 91  | 62.6  | 7.7 | 4.5 | 1.4 | 1   | 20 | 21 | 36  | 293 | 220 | 94  | 79 | 116 | 9.9 | 79    | 497 | 15   | 43.5 | 24.4 | 290 | 24.3 | 0.45 | 139 | 4.5 | 96  | 9.7 | 3.2 | 88  | 15.7 | 14.8 | 1.7 | 1.9 |
| 72 M | 158.9 | 49.9 | 19.76 | 19.6 | 74   | 156 | 90 | 112   | 72  | 11    | 7.3 | 4.2 | 1.4 | 1.1 | 26 | 38 | 40  | 174 | 187 | 80  | 53 | 110 | 5.6 | 58.3  | 479 | 15.7 | 46   | 20.9 | 285 | 14.6 | 0.68 | 139 | 4.3 | 102 | 9   | 5.3 | 128 | 9.2  | 10.6 | 0.8 | 1.3 |
| 37 M | 168.4 | 60.2 | 21.23 | 21.4 | 75.5 | 108 | 65 | 79.33 | 61  | 11.4  | 7.5 | 4.5 | 1.5 | 0.7 | 25 | 34 | 32  | 150 | 212 | 225 | 45 | 140 | 5.2 | 60.4  | 462 | 14   | 41.4 | 26.1 | 224 | 17.6 | 0.88 | 140 | 3.9 | 103 | 9.4 | 6.2 | 54  | 12.1 | 14.7 | 0.6 | 0.7 |
| 57 F | 162.3 | 56.7 | 21.53 | 28.8 | 84   | 120 | 75 | 90    | 78  | 32.7  | 7.8 | 4.5 | 1.4 | 0.7 | 19 | 16 | 13  | 252 | 229 | 140 | 60 | 138 | 5   | 54.1  | 477 | 14.3 | 42   | 19.7 | 345 | 11.8 | 0.62 | 141 | 4   | 100 | 9.4 | 4.6 | 116 | 12.6 | 8.9  | 0.6 | 0.6 |
| 56 M | 171.3 | 71.8 | 24.47 | 21.9 | 85.5 | 131 | 88 | 102.3 | 77  | 11.1  | 7.3 | 4.5 | 1.6 | 0.8 | 29 | 25 | 57  | 287 | 210 | 88  | 71 | 118 | 5.3 | 71.4  | 539 | 16.1 | 49.8 | 21.5 | 285 | 11   | 0.61 | 139 | 3.8 | 98  | 9.2 | 5.2 | 101 | 10.5 | 8.5  | 0.7 | 0.5 |
| 53 F | 156.7 | 49.9 | 20.32 | 25.9 | 66.5 | 137 | 87 | 103.7 | 63  | 11.7  | 7.6 | 4.3 | 1.3 | 0.7 | 22 | 16 | 18  | 213 | 250 | 88  | 66 | 152 | 5.2 | 66.7  | 460 | 13.7 | 42.7 | 25.4 | 280 | 13.1 | 0.57 | 140 | 3.8 | 102 | 9.4 | 3.4 | 63  | 16.5 | 15.6 | 1.1 | 0.9 |
| 45 M | 170.1 | 73.4 | 25.37 | 27.2 | 85   | 115 | 71 | 85.67 | 61  | 5.3   | 7.6 | 4.4 | 1.4 | 0.7 | 21 | 42 | 76  | 257 | 252 | 282 | 49 | 181 | 5.5 | 94.9  | 473 | 14.6 | 43.9 | 36.7 | 276 | 10   | 0.74 | 138 | 4.2 | 99  | 9.3 | 4.2 | 43  | 14.7 | 16.4 | 0.8 | 0.6 |
| 43 F | 155.9 | 56.1 | 23.08 | 35.4 | 70.5 | 102 | 62 | 75.33 | 65  | 11    | 7.6 | 4.6 | 1.5 | 0.5 | 12 | 8  | 12  | 223 | 200 | 52  | 88 | 89  | 4.7 | 49.9  | 489 | 9.6  | 32.7 | 37.8 | 267 | 13   | 0.51 | 138 | 4   | 102 | 9.6 | 3.2 | 63  | 13.7 | 12.7 | 0.6 | 0.7 |
| 78 F | 147.5 | 50   | 22.98 | 29.3 | 78.5 | 131 | 76 | 94.33 | 64  | 56.3  | 7.6 | 4.8 | 1.7 | 0.5 | 36 | 44 | 52  | 332 | 180 | 84  | 80 | 67  | 5.4 | 45.1  | 441 | 14.5 | 42.6 | 20.6 | 250 | 12.7 | 0.52 | 143 | 3.8 | 103 | 9.4 | 5.1 | 97  | 12.2 | 10.1 | 1.1 | 1.1 |
| 69 F | 146.1 | 48.2 | 22.58 | 26.5 | 85.5 | 131 | 73 | 92.33 | 69  | 17    | 7.2 | 4.3 | 1.5 | 0.5 | 14 | 10 | 37  | 177 | 204 | 83  | 61 | 121 | 5.2 | 51.8  | 446 | 12.7 | 38.6 | 21.9 | 307 | 15   | 0.48 | 143 | 4.1 | 104 | 9   | 6   | 56  | 15.3 | 12.9 | 0.6 | 1.3 |
| 62 F | 144.5 | 40   | 19.16 | 22.3 | 62   | 156 | 80 | 105.3 | 59  | 102   | 7.6 | 4.6 | 1.5 | 0.7 | 26 | 21 | 27  | 178 | 269 | 47  | 81 | 152 | 5.4 | 37.6  | 465 | 14   | 42.6 | 20.3 | 238 | 18.1 | 0.66 | 142 | 3.6 | 101 | 9   | 5.3 | 70  | 13.5 | 16.3 | 1.1 | 1.5 |
| 61 F | 156.5 | 56.5 | 23.07 | 30.1 | 79   | 128 | 73 | 91.33 | 58  | 34.4  | 7.1 | 4.6 | 1.8 | 0.5 | 19 | 18 | 33  | 152 | 242 | 115 | 65 | 141 | 5   | 64.2  | 428 | 13.9 | 42.4 | 29   | 307 | 14.1 | 0.58 | 143 | 4.7 | 103 | 9.6 | 5.8 | 66  | 17   | 17   | 0.9 | 1   |
| 57 F | 148.6 | 41.3 | 18.7  | 22.5 | 59   | 147 | 87 | 107   | 62  | 16.1  | 7.3 | 4.1 | 1.3 | 1.4 | 32 | 46 | 60  | 273 | 206 | 65  | 80 | 104 | 4.9 | 43.3  | 422 | 13.2 | 39.3 | 22.3 | 285 | 15.9 | 0.61 | 139 | 3.7 | 100 | 9.1 | 5.2 | 119 | 12.8 | 12   | 0.7 | 0.7 |
| 66 F | 152.1 | 41.8 | 18.07 | 21.9 | 61.5 | 128 | 81 | 96.67 | 63  | 95.9  | 7.5 | 4.6 | 1.6 | 0.6 | 20 | 14 | 20  | 276 | 264 | 104 | 66 | 171 | 5.4 | 53.7  | 467 | 14.2 | 44   | 21.8 | 390 | 15.5 | 0.49 | 145 | 4.3 | 102 | 9.4 | 4.7 | 110 | 14.9 | 16   | 1   | 0.8 |
| 55 M | 164.5 | 70.6 | 26.09 | 28.6 | 90.5 | 109 | 70 | 83    | 72  | 17.5  | 7.6 | 4.5 | 1.5 | 0.5 | 39 | 67 | 79  | 355 | 259 | 241 | 58 | 171 | 5.7 | 64.7  | 517 | 16.2 | 46.1 | 21.9 | 262 | 18.8 | 0.68 | 140 | 4.2 | 101 | 9   | 6.4 | 62  | 16.3 | 15.6 | 0.5 | 0.7 |
| 82 F | 146.5 | 42   | 19.57 | 20.9 | 69   | 121 | 63 | 82.33 | 82  | 63.21 | 7.3 | 4.1 | 1.3 | 0.5 | 24 | 15 | 17  | 220 | 180 | 81  | 53 | 102 | 7.3 | 55.9  | 357 | 10.3 | 33   | 21.7 | 440 | 13.4 | 0.6  | 143 | 5   | 104 | 9.2 | 3.9 | 88  | 9.1  | 8.5  | 3.7 | 1.1 |
| 71 F | 150.1 | 46.8 | 20.77 | 26.2 | 69.5 | 112 | 71 | 84.67 | 70  | 13.5  | 6.9 | 4.2 | 1.6 | 0.9 | 27 | 18 | 12  | 238 | 247 | 52  | 82 | 138 | 5.2 | 52    | 409 | 13   | 38.6 | 22.8 | 375 | 13.7 | 0.49 | 142 | 3.9 | 104 | 9.1 | 3.5 | 84  | 17.4 | 18.4 | 0.8 | 0.9 |
| 90 M | 164.8 | 48   | 17.67 | 14.4 | 64   | 127 | 67 | 87    | 65  | 112   | 7.1 | 4.3 | 1.5 | 0.7 | 44 | 24 | 32  | 201 | 155 | 79  | 52 | 82  | 5.4 | 43.1  | 410 | 12.2 | 38.3 | 12.8 | 301 | 20.4 | 0.89 | 140 | 4.8 | 96  | 8.8 | 4.9 | 154 | 7.8  | 8.1  | 1.3 | 0.9 |
| 60 F | 146.8 | 47.1 | 21.86 | 28.4 | 73.5 | 115 | 72 | 86.33 | 63  | 10.3  | 6.9 | 4.2 | 1.6 | 0.5 | 23 | 13 | 17  | 328 | 214 | 86  | 70 | 107 | 5.5 | 58    | 443 | 13.7 | 41.8 | 20.3 | 312 | 16.7 | 0.63 | 144 | 3.8 | 102 | 9.1 | 4.2 | 88  | 14.9 | 12.9 | 0.6 | 0.7 |
| 68 M | 156.9 | 74.4 | 30.22 | 31.3 | 92   | 138 | 83 | 101.3 | 53  | 13    | 7.7 | 4   | 1.1 | 0.8 | 51 | 20 | 27  | 347 | 170 | 48  | 49 | 97  | 5.4 | 75.4  | 485 | 15.2 | 45.3 | 27.1 | 324 | 15.1 | 0.68 | 143 | 4.3 | 103 | 9   | 4.9 | 150 | 13.4 | 18.5 | 0.9 | 1.1 |
| 64 F | 154.2 | 56.8 | 23.89 | 34   | 85.5 | 127 | 75 | 92.33 | 69  | 15.8  | 7.7 | 4.3 | 1.3 | 0.7 | 73 | 85 | 30  | 337 | 185 | 62  | 57 | 97  | 5.2 | 75.4  | 460 | 13.4 | 41.3 | 14.9 | 250 | 20.2 | 0.63 | 146 | 5.6 | 106 | 9.6 | 6.8 | 80  | 13.3 | 14.3 | 0.8 | 0.7 |
| 66 M | 158.8 | 65.7 | 26.05 | 24.9 | 79   | 122 | 71 | 88    | 64  | 13.5  | 7.8 | 4.5 | 1.4 | 0.5 | 31 | 24 | 154 | 169 | 208 | 103 | 64 | 123 | 5.7 | 73.9  | 490 | 14.7 | 44.9 | 21.4 | 312 | 15   | 0.95 | 143 | 4.4 | 102 | 9.5 | 6.7 | 49  | 14.7 | 14.9 | 1.7 | 1.5 |
| 56 F | 153.7 | 38.7 | 16.38 | 16.7 | 72   | 94  | 61 | 72    | 61  | 15.6  | 7.9 | 4.4 | 1.3 | 0.5 | 33 | 24 | 12  | 288 | 187 | 45  | 82 | 88  | 5.8 | 72.9  | 443 | 12.6 | 39   | 35   | 359 | 13.3 | 0.52 | 142 | 4.8 | 101 | 9.4 | 4.7 | 131 | 13.5 | 12.3 | 0.7 | 0.7 |
| 77 M | 163.5 | 56.7 | 21.21 | 18.9 | 79   | 135 | 70 | 91.67 | 61  | 17.8  | 7   | 4.2 | 1.5 | 0.8 | 17 | 8  | 13  | 218 | 118 | 56  | 43 | 57  | 5.7 | 51.5  | 426 | 13.1 | 40   | 17.9 | 318 | 14   | 0.7  | 143 | 3.7 | 100 | 8.8 | 4.9 | 119 | 9.8  | 11.9 | 1.4 | 0.7 |
| 64 F | 146   | 56   | 26.27 | 33.4 | 83.5 | 136 | 87 | 103.3 | 117 | 18.1  | 7.7 | 4.6 | 1.5 | 0.7 | 26 | 18 | 17  | 352 | 218 | 84  | 73 | 114 | 5.5 | 52.1  | 459 | 13.3 | 41.2 | 13.8 | 312 | 11.2 | 0.55 | 142 | 3.9 | 102 | 9.6 | 3.3 | 90  | 14.5 | 14   | 0.6 | 0.7 |
| 47 M | 168.9 | 64.3 | 22.54 | 20.8 | 79.5 | 121 | 77 | 91.67 | 41  | 7.6   | 7   | 4.3 | 1.6 | 0.9 | 18 | 16 | 25  | 164 | 183 | 55  | 85 | 80  | 4.7 | 29.2  | 456 | 14.4 | 42   | 20.1 | 218 | 9.7  | 0.6  | 139 | 4.1 | 99  | 9.3 | 4.4 | 78  | 8    | 10.2 | 0.6 | 0.7 |
| 55 M | 176.4 | 73   | 23.46 | 25.6 | 87   | 115 | 77 | 89.67 | 61  | 9.2   | 7.1 | 4.1 | 1.4 | 0.6 | 28 | 36 | 64  | 237 | 199 | 55  | 60 | 13  | 5.1 | 43.4  | 466 | 14.8 | 44.9 | 17.6 | 301 | 18.6 | 0.93 | 142 | 3.4 | 100 | 9.3 | 8.4 | 132 | 14.3 | 13.9 | 0.6 | 0.7 |
| 54 F | 141.3 | 41.7 | 20.89 | 29.1 | 71.5 | 97  | 57 | 70.33 | 65  | 5.6   | 7.3 | 4.3 | 1.4 | 0.8 | 31 | 33 | 12  | 348 | 297 | 77  | 83 | 176 | 4.8 | 46    | 420 | 13   | 39.5 | 25.4 | 367 | 13.6 | 0.57 | 140 | 3.9 | 99  | 9.2 | 3.9 | 148 | 15.2 | 12.1 | 0.5 | 0.7 |
| 60 M | 163.4 | 78.8 | 29.51 | 35.6 | 101  | 146 | 81 | 102.7 | 72  | 76.5  | 7.1 | 4.5 | 1.7 | 0.8 | 25 | 23 | 60  | 183 | 228 | 249 | 50 | 144 | 6.2 | 79.5  | 517 | 15.4 | 46.5 | 33.6 | 290 | 17.5 | 0.81 | 139 | 4   | 99  | 9.3 | 5   | 47  | 17.7 | 14.3 | 0.6 | 0.6 |

|      |       |      |       |      |      |     |    |       |     |      |     |     |     |     |    |    |     |     |     |     |     |     |     |      |     |      |      |      |     |      |      |     |     |     |      |     |     |      |      |     |     |     |
|------|-------|------|-------|------|------|-----|----|-------|-----|------|-----|-----|-----|-----|----|----|-----|-----|-----|-----|-----|-----|-----|------|-----|------|------|------|-----|------|------|-----|-----|-----|------|-----|-----|------|------|-----|-----|-----|
| 61 F | 151.7 | 46.6 | 20.25 | 25.1 | 72   | 140 | 72 | 94.67 | 91  | 11   | 7.1 | 4.4 | 1.6 | 0.5 | 22 | 10 | 16  | 173 | 224 | 110 | 67  | 128 | 5.8 | 53.8 | 465 | 13.4 | 42   | 25.3 | 301 | 13.1 | 0.5  | 142 | 4.3 | 102 | 9.6  | 4.6 | 96  | 14.1 | 13.9 | 0.9 | 1   |     |
| 67 M | 166.9 | 60.1 | 21.58 | 18.3 | 74   | 162 | 97 | 118.7 | 62  | 16.5 | 7.1 | 4.3 | 1.5 | 0.5 | 18 | 12 | 35  | 233 | 199 | 107 | 59  | 108 | 5.5 | 72.2 | 477 | 14.9 | 45   | 18.7 | 301 | 14.9 | 0.73 | 142 | 4.3 | 102 | 9.3  | 4.9 | 96  | 13.7 | 15   | 0.7 | 0.8 |     |
| 67 F | 144.9 | 48.5 | 23.1  | 29.5 | 81.5 | 125 | 72 | 89.67 | 93  | 28.1 | 7.6 | 4.6 | 1.5 | 0.7 | 18 | 18 | 22  | 278 | 194 | 147 | 51  | 117 | 6.6 | 73.4 | 486 | 14.2 | 44.1 | 19.9 | 301 | 13.6 | 0.68 | 143 | 4.1 | 101 | 9.4  | 4.6 | 103 | 19.5 | 16.7 | 1.2 | 1.3 |     |
| 57 M | 156.3 | 56.3 | 23.05 | 20.9 | 76   | 150 | 94 | 112.7 | 51  | 10.3 | 7   | 4.3 | 1.6 | 0.8 | 19 | 12 | 37  | 160 | 198 | 126 | 54  | 127 | 5.6 | 73   | 508 | 15.2 | 47   | 22.3 | 271 | 17.3 | 0.84 | 139 | 3.9 | 97  | 9.4  | 5.3 | 85  | 13.8 | 11.2 | 0.7 | 0.8 |     |
| 75 M | 162.6 | 59.1 | 22.35 | 17.7 | 78   | 142 | 78 | 99.33 | 51  | 45.8 | 7.9 | 4.7 | 1.5 | 0.9 | 17 | 11 | 25  | 162 | 195 | 67  | 66  | 102 | 5.4 | 49.1 | 449 | 13.9 | 42.6 | 14.4 | 440 | 15.1 | 0.79 | 142 | 4   | 100 | 9.8  | 6.6 | 80  | 12.4 | 11.9 | 2.5 | 1.9 |     |
| 67 M | 153.8 | 54.5 | 23.04 | 20.5 | 77.5 | 149 | 87 | 107.7 | 56  | 9.7  | 7.3 | 4.2 | 1.4 | 0.5 | 24 | 17 | 26  | 267 | 223 | 136 | 49  | 143 | 5.1 | 69.1 | 473 | 15.9 | 48.7 | 23.8 | 290 | 17   | 0.97 | 144 | 3.7 | 104 | 9.5  | 6.6 | 92  | 10.4 | 12.5 | 0.7 | 0.7 |     |
| 68 F | 155.7 | 53.8 | 22.19 | 25.7 | 77.5 | 176 | 80 | 112   | 68  | 20.5 | 7.3 | 4.3 | 1.4 | 0.8 | 20 | 15 | 28  | 253 | 247 | 68  | 68  | 164 | 5.2 | 65.6 | 411 | 12.8 | 39.7 | 25.5 | 280 | 23.9 | 0.53 | 142 | 3.9 | 101 | 9.6  | 2.8 | 101 | 17.8 | 15.8 | 1.3 | 1.4 |     |
| 64 F | 149.5 | 45.1 | 20.18 | 24.3 | 62   | 116 | 73 | 87.33 | 80  | 44.2 | 7.6 | 4.5 | 1.5 | 0.7 | 20 | 15 | 12  | 195 | 191 | 61  | 62  | 103 | 5.3 | 65.3 | 436 | 13.8 | 41   | 21.4 | 352 | 11.4 | 0.51 | 142 | 3.5 | 100 | 9.5  | 4.2 | 64  | 10.6 | 10.6 | 0.7 | 0.6 |     |
| 63 F | 155.3 | 51.4 | 21.31 | 27.4 | 89   | 109 | 54 | 72.33 | 63  | 22.4 | 7   | 4.3 | 1.6 | 0.6 | 23 | 22 | 22  | 118 | 218 | 62  | 56  | 144 | 5.3 | 46   | 426 | 12.5 | 38.3 | 23.5 | 254 | 16.9 | 0.65 | 142 | 3.9 | 103 | 9.3  | 4.6 | 82  | 8.7  | 9.9  | 0.7 | 0.7 |     |
| 54 M | 164.4 | 65   | 24.05 | 24.4 | 82.3 | 130 | 85 | 100   | 53  | 7.3  | 6.9 | 4.3 | 1.7 | 0.2 | 26 | 23 | 114 | 201 | 209 | 801 | 34  | 60  | 5.6 | 67.3 | 472 | 14.6 | 43.7 | 29.7 | 262 | 15.5 | 0.87 | 143 | 4.2 | 102 | 9.7  | 6.2 | 62  | 10.6 | 10.6 | 0.6 | 0.6 |     |
| 70 M | 166.5 | 54.2 | 19.55 | 17.2 | 74.5 | 151 | 89 | 109.7 | 60  | 10.7 | 7.3 | 4.5 | 1.6 | 0.8 | 29 | 23 | 147 | 229 | 160 | 105 | 44  | 83  | 5.5 | 48.9 | 449 | 13.5 | 40.3 | 22.6 | 216 | 25   | 1.14 | 143 | 4.5 | 104 | 9.4  | 7.8 | 95  | 9.5  | 9.5  | 0.7 | 0.8 |     |
| 77 F | 148.3 | 50.9 | 23.14 | 26.7 | 90.5 | 125 | 72 | 89.67 | 77  | 9.1  | 7.7 | 4.4 | 1.3 | 0.6 | 23 | 15 | 17  | 367 | 186 | 96  | 58  | 99  | 5.3 | 64.2 | 459 | 13.9 | 43.1 | 22.8 | 307 | 7.5  | 0.53 | 140 | 3.4 | 98  | 9.4  | 3.6 | 86  | 9.3  | 7.8  | 0.9 | 0.6 |     |
| 83 F | 149.7 | 48.2 | 21.51 | 28.7 | 85.5 | 131 | 70 | 90.33 | 69  | 38.6 | 8.7 | 5.1 | 1.4 | 0.9 | 34 | 21 | 28  | 186 | 200 | 80  | 62  | 113 | 5.4 | 67.7 | 461 | 14.2 | 43   | 23.7 | 307 | 19.1 | 0.61 | 138 | 4.1 | 97  | 10.1 | 4.6 | 72  | 10.6 | 11.3 | 0.8 | 0.7 |     |
| 66 F | 156.1 | 57.7 | 23.68 | 27.6 | 69.5 | 128 | 73 | 91.33 | 62  | 12.3 | 7.3 | 4.5 | 1.6 | 1.3 | 17 | 15 | 30  | 169 | 228 | 113 | 75  | 125 | 5.5 | 47.6 | 473 | 14.8 | 45   | 20.4 | 188 | 12.7 | 0.58 | 143 | 4   | 101 | 9.9  | 4.1 | 78  | 17.3 | 13.7 | 0.7 | 0.7 |     |
| 66 F | 157.2 | 50.6 | 20.48 | 23.1 | 76   | 123 | 77 | 92.33 | 53  | 38.3 | 6.9 | 4.3 | 1.7 | 0.5 | 23 | 17 | 22  | 265 | 199 | 114 | 67  | 100 | 5.1 | 55.9 | 461 | 14.1 | 42.3 | 13.3 | 276 | 11.7 | 0.59 | 144 | 3.8 | 103 | 9.5  | 4.6 | 97  | 12.5 | 12.5 | 0.7 | 0.6 |     |
| 67 M | 166   | 63.7 | 23.12 | 22.9 | 83   | 132 | 78 | 96    | 43  | 5.9  | 7.6 | 4.2 | 1.2 | 0.8 | 24 | 18 | 23  | 172 | 171 | 102 | 39  | 95  | 6   | 49.9 | 482 | 12.9 | 41.2 | 17.1 | 202 | 18.6 | 0.76 | 142 | 3.7 | 102 | 9.3  | 7.3 | 85  | 13.6 | 12.6 | 0.6 | 0.7 |     |
| 43 F | 169.7 | 54.3 | 18.86 | 22.9 | 69.5 | 92  | 57 | 68.67 | 50  | 6.8  | 8.1 | 4.6 | 1.3 | 1   | 18 | 9  | 10  | 135 | 228 | 44  | 74  | 126 | 5.5 | 49   | 449 | 13.8 | 41.9 | 21.4 | 235 | 7.1  | 0.55 | 141 | 4.5 | 99  | 9.6  | 2   | 74  | 11.5 | 13.4 | 0.5 | 0.5 |     |
| 69 F | 159.7 | 63   | 24.7  | 34.8 | 81.5 | 145 | 76 | 99    | 66  | 13.8 | 7.3 | 4.3 | 1.4 | 0.5 | 22 | 19 | 15  | 188 | 235 | 100 | 64  | 136 | 5.7 | 69.7 | 489 | 13.3 | 41.9 | 27.1 | 347 | 13.1 | 0.52 | 142 | 3.8 | 103 | 9.3  | 5.3 | 62  | 11.5 | 16.5 | 0.9 | 1   |     |
| 71 M | 176.5 | 67.8 | 21.76 | 22.9 | 83   | 118 | 76 | 90    | 66  | 7.3  | 7.2 | 4.1 | 1.3 | 0.6 | 19 | 16 | 26  | 221 | 200 | 122 | 42  | 145 | 5.4 | 82.4 | 503 | 15.6 | 47.3 | 22   | 346 | 14.2 | 0.75 | 142 | 4.1 | 101 | 9.2  | 5.2 | 69  | 8    | 9.4  | 0.6 | 0.8 |     |
| 68 F | 150.5 | 52.5 | 23.18 | 31   | 83.5 | 122 | 67 | 85.33 | 74  | 21.3 | 7.9 | 4.7 | 1.5 | 0.5 | 26 | 24 | 21  | 219 | 199 | 301 | 46  | 113 | 5.7 | 67.8 | 512 | 14.9 | 46.4 | 23.5 | 428 | 13.8 | 0.56 | 141 | 4.2 | 100 | 9.7  | 6   | 66  | 13   | 11.4 | 0.6 | 0.6 |     |
| 71 F | 153   | 54.4 | 23.24 | 36.9 | 92.5 | 112 | 56 | 74.67 | 63  | 16.5 | 7.6 | 4.2 | 1.2 | 0.6 | 21 | 16 | 33  | 315 | 187 | 130 | 52  | 101 | 5.7 | 69.6 | 452 | 13.5 | 41.5 | 19.8 | 334 | 15.5 | 0.55 | 140 | 3.9 | 100 | 9.4  | 4.9 | 81  | 11.9 | 12   | 0.6 | 1   |     |
| 60 M | 169.6 | 83.4 | 28.99 | 32.7 | 94.5 | 115 | 72 | 86.33 | 64  | 8.3  | 7.5 | 4.4 | 1.4 | 0.5 | 15 | 20 | 55  | 245 | 223 | 115 | 48  | 143 | 5.8 | 59.3 | 477 | 15.2 | 47.2 | 20.7 | 291 | 21   | 0.8  | 142 | 4   | 103 | 9.6  | 6.7 | 42  | 10.4 | 9.6  | 0.9 | 0.9 |     |
| 68 F | 152.5 | 50.4 | 21.67 | 28.7 | 72.5 | 127 | 68 | 87.67 | 63  | 33.6 | 7.4 | 4.5 | 1.6 | 0.8 | 30 | 21 | 14  | 183 | 226 | 80  | 101 | 93  | 5.1 | 32.8 | 439 | 13.6 | 41.8 | 12.6 | 322 | 18.4 | 0.53 | 142 | 4   | 103 | 9.4  | 5.1 | 70  | 10.4 | 10.2 | 0.8 | 0.8 |     |
| 65 F | 152.9 | 55.3 | 23.65 | 28   | 81   | 124 | 69 | 87.33 | 56  | 30.8 | 7   | 4.1 | 1.4 | 1   | 24 | 29 | 31  | 269 | 212 | 53  | 67  | 118 | 5   | 41.7 | 467 | 14   | 42.8 | 26.3 | 244 | 16.2 | 0.64 | 139 | 4   | 102 | 9    | 3   | 9   | 100  | 9.4  | 9.9 | 0.7 | 0.8 |
| 66 F | 155.7 | 55.5 | 22.89 | 29.1 | 85.5 | 107 | 60 | 75.67 | 54  | 18.9 | 7.6 | 4.4 | 1.4 | 0.7 | 27 | 21 | 22  | 209 | 211 | 96  | 43  | 135 | 5.3 | 55.9 | 440 | 13.9 | 42.9 | 16.7 | 247 | 13.4 | 0.52 | 140 | 3.8 | 101 | 9.4  | 6.1 | 91  | 10   | 11.4 | 1   | 1   |     |
| 28 M | 176.1 | 68   | 21.93 | 23.5 | 75.5 | 127 | 69 | 88.33 | 72  | 4.9  | 8.1 | 5.1 | 1.7 | 0.8 | 21 | 16 | 34  | 195 | 216 | 120 | 56  | 138 | 5   | 82.2 | 553 | 16   | 48.4 | 20.8 | 291 | 13.1 | 0.76 | 140 | 3.6 | 98  | 10   | 6.3 | 58  | 15.9 | 17.2 | 0.5 | 0.5 |     |
| 75 F | 150.5 | 60.2 | 26.58 | 35   | 92   | 140 | 77 | 98    | 67  | 20.3 | 7.4 | 4.4 | 1.5 | 0.4 | 20 | 16 | 16  | 258 | 211 | 63  | 57  | 129 | 5.6 | 55.5 | 441 | 12.7 | 39.4 | 17.8 | 375 | 13.2 | 0.49 | 144 | 4.1 | 104 | 9.2  | 4.5 | 135 | 13.2 | 13.8 | 0.8 | 0.6 |     |
| 75 F | 149   | 44.2 | 19.91 | 23.2 | 70.5 | 134 | 70 | 91.33 | 63  | 39.7 | 7   | 4.1 | 1.4 | 0.4 | 15 | 16 | 39  | 230 | 164 | 91  | 42  | 95  | 6.6 | 69.8 | 455 | 11.9 | 37.9 | 22   | 247 | 15.5 | 0.55 | 140 | 4   | 104 | 9    | 5.7 | 51  | 22.8 | 19.6 | 0.8 | 1.2 |     |
| 48 F | 157.1 | 50.5 | 20.46 | 22.4 | 64   | 103 | 55 | 71    | 72  | 8.7  | 6.9 | 4.2 | 1.6 | 1.7 | 17 | 13 | 12  | 126 | 187 | 42  | 70  | 93  | 5   | 53.2 | 411 | 12.1 | 38   | 20.8 | 212 | 14.5 | 0.58 | 138 | 3.9 | 104 | 8.9  | 4.2 | 81  | 18.6 | 19.3 | 0.6 | 0.6 |     |
| 79 M | 177.8 | 72.8 | 23.03 | 21.2 | 89   | 144 | 84 | 104   | 55  | 16   | 6.8 | 4.1 | 1.5 | 1.1 | 18 | 11 | 18  | 263 | 186 | 153 | 36  | 123 | 5.1 | 45.3 | 424 | 13.6 | 41.4 | 16.9 | 250 | 12.6 | 0.89 | 139 | 3.8 | 106 | 9    | 5.5 | 112 | 9.1  | 7.8  | 0.9 | 1.1 |     |
| 76 M | 172.1 | 51.8 | 17.49 | 16.4 | 77   | 127 | 79 | 95    | 100 | 12.5 | 7.3 | 4.4 | 1.5 | 1.2 | 48 | 30 | 76  | 249 | 232 | 47  | 115 | 89  | 4.9 | 49.4 | 454 | 15   | 43.5 | 28   | 277 | 9.4  | 0.66 | 140 | 3.8 | 101 | 9.3  | 5.7 | 52  | 9.8  | 11.9 | 0.7 | 0.6 |     |
| 76 F | 138.7 | 41.9 | 21.78 | 26   | 87   | 128 | 71 | 90    | 71  | 50.1 | 7.2 | 4.2 | 1.4 | 0.4 | 31 | 19 | 15  | 255 | 203 | 111 | 53  | 117 | 5.5 | 47   | 465 | 13.1 | 41.7 | 17.5 | 416 | 11.3 | 0.55 | 143 | 3.7 | 104 | 9.2  | 3.8 | 69  | 14.4 | 15.4 | 0.7 | 0.6 |     |
| 86 F | 146.3 | 51   | 23.83 | 26.5 | 80.5 | 153 | 76 | 101.7 | 71  | 36.5 | 7.6 | 4.5 | 1.5 | 0.4 | 24 | 25 | 22  | 127 | 165 | 216 | 48  | 76  | 5.8 | 73.5 | 422 | 13.6 | 39.4 | 17.6 | 217 | 21.2 | 0.9  | 140 | 4   | 103 | 9.3  | 5.5 | 77  | 10.8 | 12.3 | 0.6 | 0.9 |     |
| 70 M | 167.7 | 79.2 | 28.16 | 35   | 96.5 | 127 | 65 | 85.67 | 51  | 7.2  | 7.5 | 4.2 | 1.3 | 1.7 | 21 | 17 | 19  | 192 | 175 | 92  | 51  | 93  | 4.9 | 70.5 | 477 | 15.6 | 46.4 | 19.9 | 322 | 20.1 | 0.98 | 139 | 4.7 | 102 | 9.7  | 6.2 | 65  | 13.1 | 11.9 | 0.6 | 1.2 |     |
| 66 M | 170.2 | 67.9 | 23.44 | 22.4 | 85.8 | 141 | 89 | 106.3 | 51  | 42   | 7.2 | 4.3 | 1.5 | 0.5 | 20 | 14 | 11  | 158 | 204 | 122 | 50  | 115 | 5.2 | 51.5 | 488 | 13.7 | 42.3 | 23.2 | 257 | 13.8 | 0.84 | 140 | 3.9 | 101 | 9.3  | 5.3 | 70  | 17.8 | 15.3 | 0.6 | 0.9 |     |
| 65 F | 156.2 | 54.6 | 22.38 | 27   | 87   | 134 | 84 | 100.7 | 69  | 37.4 | 6.7 | 4.2 | 1.7 | 0.6 | 26 | 26 | 29  | 208 | 217 | 110 | 58  | 130 | 5.4 | 43.6 | 414 | 12.9 | 39.5 | 24.1 | 316 | 15.2 | 0.68 | 141 | 4.1 | 104 | 9.1  | 4.2 | 140 |      |      |     |     |     |

|      |       |      |       |      |      |     |    |       |    |      |     |     |     |     |      |     |     |     |     |     |     |     |     |       |     |      |      |      |     |      |      |     |     |     |     |     |     |      |      |     |     |
|------|-------|------|-------|------|------|-----|----|-------|----|------|-----|-----|-----|-----|------|-----|-----|-----|-----|-----|-----|-----|-----|-------|-----|------|------|------|-----|------|------|-----|-----|-----|-----|-----|-----|------|------|-----|-----|
| 59 F | 158.2 | 44.3 | 17.7  | 8.9  | 75.3 | 126 | 72 | 90    | 63 | 56.2 | 6.8 | 4.4 | 1.8 | 2   | 88.6 | 140 | 94  | 222 | 247 | 88  | 150 | 46  | 5   | 55    | 432 | 13.9 | 41.6 | 17.8 | 188 | 11.9 | 0.53 | 138 | 3.4 | 99  | 9.2 | 3.4 | 42  | 16.8 | 15.4 | 1.7 | 1.4 |
| 65 F | 158.5 | 65.2 | 25.95 | 35.2 | 91.7 | 148 | 94 | 112   | 69 | 34.3 | 7.3 | 4.2 | 1.4 | 0.7 | 47   | 58  | 47  | 346 | 159 | 64  | 60  | 74  | 5.2 | 60.6  | 435 | 13.6 | 40   | 23.6 | 194 | 13.3 | 0.55 | 139 | 4   | 102 | 9.2 | 4.1 | 59  | 12.1 | 10.6 | 0.9 | 1   |
| 79 F | 147.4 | 46.1 | 21.22 | 22.4 | 86.5 | 129 | 72 | 91    | 65 | 22.1 | 7.2 | 4.4 | 1.6 | 0.7 | 23   | 13  | 15  | 203 | 205 | 64  | 67  | 110 | 5.5 | 50.2  | 413 | 12.3 | 37.9 | 17.4 | 316 | 23.8 | 0.65 | 141 | 3.6 | 100 | 9.2 | 5.1 | 88  | 10.8 | 11.7 | 0.6 | 0.7 |
| 62 M | 173.4 | 74.7 | 24.84 | 23.2 | 86.2 | 134 | 80 | 98    | 64 | 10.3 | 7.8 | 4.6 | 1.4 | 0.8 | 56   | 101 | 46  | 259 | 233 | 188 | 59  | 135 | 5.7 | 63.4  | 525 | 15.8 | 47.3 | 13.7 | 227 | 12.6 | 0.94 | 138 | 4   | 99  | 9.7 | 6.2 | 90  | 15.5 | 17.2 | 0.8 | 1   |
| 72 F | 152.5 | 37.8 | 16.25 | 14   | 62   | 141 | 75 | 97    | 57 | 37.7 | 7.3 | 4.5 | 1.6 | 1.8 | 53   | 23  | 43  | 386 | 197 | 80  | 76  | 92  | 5   | 33.4  | 408 | 13   | 39.8 | 11.9 | 244 | 10.8 | 0.57 | 141 | 3.3 | 101 | 9.4 | 4.3 | 83  | 10.8 | 13.9 | 0.9 | 0.8 |
| 67 M | 161.3 | 56.2 | 21.6  | 19.6 | 83   | 139 | 66 | 90.33 | 65 | 35.5 | 7.2 | 4.2 | 1.4 | 0.8 | 29   | 22  | 71  | 201 | 206 | 56  | 86  | 96  | 5.3 | 51.6  | 459 | 15.1 | 45   | 29.7 | 291 | 12.7 | 0.76 | 140 | 4.8 | 102 | 9.3 | 4.6 | 91  | 14.4 | 13   | 0.7 | 0.6 |
| 63 M | 167.3 | 76.7 | 27.4  | 37.8 | 94.5 | 135 | 84 | 101   | 66 | 16.9 | 8   | 4.7 | 1.4 | 0.6 | 17   | 13  | 27  | 264 | 167 | 177 | 56  | 44  | 9.9 | 60.8  | 534 | 15.1 | 46.3 | 24.5 | 176 | 19.2 | 0.6  | 137 | 4.1 | 100 | 9.3 | 5   | 35  | 17.7 | 20.4 | 1.1 | 0.7 |
| 74 M | 167.5 | 74.7 | 26.63 | 22.8 | 96.8 | 126 | 71 | 89.33 | 90 | 94.7 | 7   | 4.4 | 1.7 | 0.8 | 24   | 22  | 23  | 188 | 159 | 127 | 44  | 89  | 5.4 | 62.1  | 458 | 14.9 | 43.7 | 19.7 | 311 | 13.4 | 0.83 | 140 | 4   | 104 | 8.8 | 6.2 | 67  | 17.1 | 15.1 | 0.7 | 1.6 |
| 59 M | 168.8 | 60.8 | 21.34 | 18.1 | 83   | 124 | 80 | 94.67 | 62 | 14.6 | 6.5 | 4   | 1.6 | 0.7 | 21   | 15  | 122 | 174 | 181 | 78  | 80  | 82  | 5.5 | 49.5  | 460 | 15.1 | 44.1 | 22.6 | 277 | 11.8 | 0.85 | 141 | 4   | 102 | 8.8 | 5.1 | 102 | 10.5 | 9.5  | 1.1 | 1.4 |
| 60 F | 160.9 | 67.5 | 26.07 | 33.1 | 99.3 | 129 | 84 | 99    | 62 | 26.7 | 6.8 | 4.2 | 1.6 | 0.8 | 24   | 24  | 29  | 156 | 249 | 142 | 71  | 150 | 5.6 | 45.5  | 512 | 15.4 | 46.3 | 15.9 | 186 | 14.7 | 0.52 | 141 | 4.2 | 103 | 9.4 | 6.4 | 75  | 10.8 | 11.5 | 0.7 | 0.7 |
| 68 M | 169.7 | 83   | 28.82 | 31.4 | 94.3 | 151 | 95 | 113.7 | 66 | 8.5  | 7.9 | 4.5 | 1.3 | 1   | 32   | 32  | 37  | 233 | 129 | 82  | 39  | 71  | 5.7 | 70.8  | 475 | 15.6 | 45.6 | 20.3 | 238 | 14.5 | 0.75 | 141 | 4.1 | 104 | 9.1 | 6.8 | 58  | 13.5 | 14.2 | 1.2 | 1.4 |
| 70 M | 169.2 | 70.2 | 24.52 | 20   | 94.5 | 114 | 55 | 74.67 | 77 | 50   | 7.6 | 4.3 | 1.3 | 0.7 | 29   | 24  | 83  | 195 | 173 | 59  | 79  | 72  | 5.4 | 53.5  | 384 | 12.9 | 39.4 | 26.5 | 222 | 14.6 | 0.69 | 139 | 4.1 | 102 | 9.2 | 4   | 68  | 11   | 8    | 1.1 | 1.3 |
| 62 M | 152.5 | 61.4 | 26.4  | 21.9 | 83.3 | 148 | 83 | 104.7 | 78 | 33.8 | 7.2 | 4.4 | 1.6 | 0.8 | 26   | 24  | 41  | 353 | 206 | 136 | 52  | 132 | 5.3 | 59.2  | 465 | 14.6 | 43.6 | 22.2 | 241 | 10.5 | 0.7  | 139 | 3.9 | 99  | 8.9 | 5   | 69  | 11.2 | 9.9  | 2.5 | 1   |
| 54 M | 166.6 | 66.6 | 24    | 19.9 | 85.5 | 96  | 55 | 68.67 | 54 | 17.1 | 6.7 | 4.5 | 2   | 0.9 | 16   | 13  | 15  | 162 | 187 | 97  | 57  | 102 | 5.4 | 51.2  | 488 | 4.5  | 43.1 | 15.5 | 204 | 12.6 | 0.83 | 142 | 4   | 104 | 9   | 6.1 | 82  | 12.5 | 15.5 | 0.7 | 0.6 |
| 57 M | 160.4 | 47.2 | 18.35 | 11.3 | 64.5 | 104 | 59 | 74    | 43 | 18.8 | 7.1 | 4.4 | 1.6 | 1   | 20   | 18  | 35  | 226 | 256 | 75  | 86  | 141 | 5.7 | 61.5  | 455 | 14.6 | 43.2 | 19.8 | 217 | 17.1 | 0.89 | 142 | 4.1 | 103 | 9.4 | 3.4 | 69  | 11   | 7.9  | 1   | 0.6 |
| 61 F | 146.3 | 43.2 | 20.18 | 21   | 61   | 138 | 75 | 96    | 68 | 18.5 | 7.1 | 4.5 | 1.7 | 1.1 | 47   | 65  | 17  | 248 | 235 | 107 | 82  | 127 | 5.5 | 46.4  | 481 | 13.8 | 42.7 | 20.6 | 277 | 12.9 | 0.62 | 142 | 4.2 | 102 | 9.3 | 3.7 | 193 | 8.6  | 9.1  | 0.6 | 0.8 |
| 67 M | 157.4 | 51   | 20.59 | 20   | 73.5 | 114 | 65 | 81.33 | 55 | 14.1 | 6.7 | 4   | 1.5 | 1.1 | 19   | 11  | 165 | 295 | 164 | 106 | 55  | 83  | 5.2 | 36.5  | 432 | 14.2 | 42.4 | 28.3 | 277 | 9.8  | 0.79 | 138 | 4.2 | 104 | 8.8 | 2.8 | 102 | 11.9 | 9.5  | 0.8 | 0.9 |
| 58 M | 172.8 | 57.6 | 19.29 | 15   | 75   | 156 | 83 | 107.3 | 66 | 71.5 | 6.8 | 3.9 | 1.3 | 0.7 | 19   | 17  | 1   | 189 | 154 | 71  | 52  | 85  | 5.6 | 67.3  | 504 | 14.7 | 44.7 | 20   | 465 | 17.1 | 0.79 | 142 | 4.1 | 101 | 9   | 4.6 | 72  | 7.5  | 7.6  | 1.1 | 0.6 |
| 59 F | 154.5 | 48.9 | 20.49 | 25.3 | 74.6 | 134 | 72 | 92.67 | 66 | 9.8  | 7.4 | 4.4 | 1.5 | 0.6 | 23   | 20  | 19  | 161 | 229 | 88  | 77  | 128 | 5.4 | 50.1  | 415 | 12.2 | 36.7 | 26.8 | 291 | 13.7 | 1.56 | 140 | 3.4 | 102 | 9   | 4   | 165 | 14   | 12   | 0.7 | 0.8 |
| 73 M | 170.4 | 76.7 | 26.42 | 22.5 | 94   | 115 | 70 | 85    | 57 | 16.7 | 6.5 | 4.1 | 1.7 | 0.5 | 19   | 19  | 38  | 162 | 144 | 116 | 35  | 88  | 5.2 | 56.9  | 458 | 14.6 | 42.5 | 15.2 | 172 | 14.4 | 0.68 | 139 | 3.6 | 103 | 8.6 | 5.7 | 46  | 7    | 7    | 0.7 | 0.8 |
| 36 M | 166.1 | 85.6 | 31.03 | 30.5 | 104  | 140 | 80 | 100   | 58 | 14.1 | 7.1 | 4.5 | 1.7 | 0.6 | 34   | 75  | 75  | 226 | 261 | 272 | 44  | 177 | 5.8 | 116.7 | 508 | 15.8 | 46.5 | 26.9 | 269 | 14.3 | 0.74 | 139 | 4.2 | 101 | 9.4 | 4.6 | 50  | 10   | 10   | 0.6 | 0.6 |
| 41 M | 170.9 | 70.1 | 24    | 29.4 | 89.5 | 123 | 76 | 91.67 | 64 | 6.9  | 7.7 | 4.7 | 1.6 | 0.4 | 17   | 27  | 63  | 209 | 327 | 353 | 59  | 222 | 5.5 | 118.4 | 509 | 16   | 47.2 | 34.5 | 244 | 10.7 | 0.83 | 140 | 4   | 100 | 9.9 | 6.1 | 91  | 14   | 16   | 0.8 | 0.6 |
| 42 M | 163.2 | 86.6 | 32.51 | 34.9 | 106  | 161 | 80 | 107   | 64 | 24.9 | 7.1 | 4.4 | 1.6 | 0.7 | 36   | 52  | 94  | 163 | 196 | 131 | 46  | 135 | 5.8 | 73.5  | 580 | 17.5 | 50.3 | 23.3 | 235 | 9.9  | 0.87 | 140 | 3.8 | 100 | 9.3 | 7.4 | 46  | 14   | 16   | 0.9 | 1   |
| 65 M | 157.3 | 50.1 | 20.25 | 16.6 | 72.3 | 120 | 72 | 88    | 83 | 16.7 | 7.5 | 4.6 | 1.6 | 1.1 | 23   | 17  | 15  | 176 | 229 | 151 | 43  | 127 | 6.2 | 75.2  | 413 | 13.3 | 40.1 | 22.5 | 322 | 16.7 | 1.03 | 141 | 4   | 101 | 9.4 | 6.6 | 75  | 17.7 | 17.6 | 0.7 | 0.6 |
| 67 F | 158.1 | 78.2 | 31.29 | 36.2 | 101  | 147 | 66 | 93    | 72 | 29.1 | 7.4 | 4.5 | 1.6 | 1   | 42   | 58  | 40  | 298 | 239 | 68  | 42  | 173 | 6.1 | 55.8  | 492 | 15   | 45.1 | 16.3 | 265 | 17.8 | 0.63 | 144 | 4.3 | 102 | 9.6 | 5.7 | 32  | 8.9  | 9.3  | 0.8 | 1   |
| 57 F | 153   | 44.7 | 19.1  | 22.9 | 74.5 | 93  | 49 | 63.67 | 61 | 7.3  | 7.6 | 4.3 | 1.3 | 0.7 | 18   | 13  | 9   | 270 | 252 | 85  | 79  | 132 | 5.2 | 32.6  | 431 | 13.3 | 40.9 | 21   | 230 | 15.2 | 0.55 | 139 | 4.4 | 100 | 9.5 | 4.6 | 81  | 9.8  | 14.2 | 0.6 | 1.2 |
| 61 F | 162.5 | 52.3 | 19.81 | 21.2 | 72.7 | 130 | 71 | 90.67 | 50 | 97.3 | 6.6 | 4   | 1.5 | 1.4 | 21   | 15  | 42  | 212 | 225 | 46  | 65  | 137 | 5.6 | 44.3  | 440 | 13   | 39.3 | 14.9 | 250 | 15.5 | 0.75 | 143 | 4.1 | 104 | 9.1 | 5.8 | 54  | 7.8  | 7.6  | 0.5 | 0.7 |
| 72 F | 155.3 | 55.9 | 23.18 | 29.1 | 90.8 | 143 | 78 | 99.67 | 67 | 38.6 | 7.8 | 4.5 | 1.4 | 0.5 | 24   | 19  | 15  | 200 | 257 | 88  | 57  | 192 | 5.5 | 94.4  | 510 | 14.6 | 43.8 | 21.7 | 269 | 18.5 | 0.69 | 141 | 4.2 | 104 | 9.4 | 7.5 | 73  | 12.6 | 12.7 | 0.8 | 0.8 |
| 60 F | 157.3 | 56.2 | 22.71 | 29.6 | 78.5 | 126 | 83 | 97.33 | 75 | 19.4 | 8.1 | 4.5 | 1.3 | 0.6 | 22   | 17  | 24  | 351 | 226 | 92  | 54  | 148 | 5.1 | 58.6  | 448 | 13.1 | 39.9 | 23.3 | 208 | 10.9 | 0.46 | 142 | 3.6 | 104 | 9.1 | 2.6 | 71  | 15.5 | 17.2 | 0.6 | 0.7 |
| 73 F | 155.4 | 45.3 | 18.76 | 19.4 | 83.5 | 150 | 79 | 102.7 | 71 | 73.3 | 7.3 | 4.5 | 1.6 | 0.9 | 31   | 15  | 23  | 196 | 174 | 80  | 55  | 93  | 6.6 | 58.3  | 461 | 12.7 | 39.8 | 16.5 | 192 | 20.6 | 0.65 | 140 | 4.4 | 99  | 9.2 | 5   | 78  | 13.4 | 15.6 | 0.6 | 0.6 |
| 64 M | 163.6 | 68.5 | 25.59 | 29   | 87.5 | 144 | 91 | 108.7 | 53 | 34.8 | 7.7 | 4.7 | 1.6 | 2.3 | 24   | 23  | 59  | 200 | 223 | 96  | 66  | 139 | 5.6 | 67.8  | 519 | 17.5 | 51   | 22.8 | 446 | 14.4 | 0.89 | 139 | 4.3 | 98  | 9.7 | 7   | 63  | 8.8  | 10   | 1.4 | 0.6 |
| 69 M | 170.1 | 64.7 | 22.36 | 21.5 | 89.3 | 140 | 81 | 100.7 | 60 | 19.1 | 7.6 | 4.7 | 1.6 | 1   | 39   | 37  | 29  | 191 | 194 | 76  | 40  | 133 | 5.4 | 38.8  | 460 | 14.4 | 42.5 | 16.4 | 261 | 14.2 | 0.76 | 141 | 3.7 | 101 | 9.2 | 6   | 87  | 18.9 | 17.7 | 0.7 | 0.7 |
| 77 F | 146.5 | 48.1 | 22.41 | 27.7 | 85.2 | 113 | 63 | 79.67 | 65 | 12.5 | 7.4 | 4   | 1.2 | 0.5 | 22   | 13  | 16  | 439 | 211 | 121 | 50  | 144 | 6   | 79.3  | 435 | 13.2 | 40.7 | 29.6 | 431 | 15.2 | 0.56 | 141 | 4.3 | 101 | 9.1 | 4   | 61  | 16.7 | 16.1 | 0.8 | 0.9 |
| 50 F | 151.6 | 62.9 | 27.37 | 40.5 | 87.5 | 148 | 95 | 112.7 | 63 | 15.8 | 7.6 | 4.4 | 1.4 | 0.9 | 21   | 20  | 18  | 203 | 273 | 97  | 69  | 174 | 6.4 | 49.6  | 482 | 14.5 | 45.3 | 21.3 | 277 | 12.1 | 0.61 | 142 | 4.1 | 101 | 9.5 | 6.8 | 50  | 17.3 | 16.9 | 0.8 | 0.6 |
| 61 M | 166.9 | 54.7 | 19.64 | 13.3 | 74   | 135 | 95 | 108.3 | 72 | 7.8  | 7.3 | 4.5 | 1.6 | 0.6 | 31   | 30  | 36  | 134 | 237 | 117 | 61  | 164 | 5.5 | 56.7  | 465 | 14.5 | 44.2 | 20.7 | 224 | 10   | 0.65 | 141 | 4.2 | 102 | 8.9 | 7.3 | 88  | 15.1 | 15   | 0.6 | 1   |
| 82 F | 134.4 | 42.9 | 23.75 | 29.1 | 84.5 | 139 | 69 | 92.33 | 59 | 83.8 | 7.4 | 4   | 1.2 | 0.6 | 29   | 16  | 30  | 174 | 233 | 168 | 64  | 125 | 5.5 | 59    | 424 | 12.9 | 40.6 | 18   | 250 | 16.3 | 0.76 | 142 | 3.6 | 104 | 8.9 | 5.2 | 70  | 13.8 | 12.9 | 0.7 | 0.7 |
| 73   |       |      |       |      |      |     |    |       |    |      |     |     |     |     |      |     |     |     |     |     |     |     |     |       |     |      |      |      |     |      |      |     |     |     |     |     |     |      |      |     |     |

|      |       |      |       |      |      |     |    |       |     |      |     |     |     |     |    |    |     |     |     |     |    |     |     |      |     |      |      |      |     |      |      |     |     |     |      |     |     |      |      |     |     |
|------|-------|------|-------|------|------|-----|----|-------|-----|------|-----|-----|-----|-----|----|----|-----|-----|-----|-----|----|-----|-----|------|-----|------|------|------|-----|------|------|-----|-----|-----|------|-----|-----|------|------|-----|-----|
| 63 F | 145.6 | 55.6 | 26.23 | 37.2 | 84.5 | 164 | 98 | 120   | 70  | 7.9  | 7.7 | 4.7 | 1.6 | 0.7 | 17 | 17 | 33  | 341 | 231 | 313 | 49 | 119 | 5   | 56.6 | 501 | 15   | 44.5 | 24.8 | 217 | 21.9 | 0.46 | 139 | 3.9 | 99  | 9.6  | 4.7 | 115 | 15.3 | 16.2 | 0.8 | 0.8 |
| 87 M | 161.4 | 59.3 | 22.76 | 14.7 | 81.5 | 124 | 60 | 81.33 | 67  | 272  | 7.4 | 4.1 | 1.2 | 0.6 | 18 | 11 | 15  | 227 | 184 | 40  | 71 | 100 | 4.9 | 30.4 | 371 | 10   | 33.3 | 18.7 | 296 | 13.3 | 0.65 | 140 | 4.3 | 102 | 8.9  | 4   | 113 | 7.6  | 7.3  | 3.2 | 1.6 |
| 64 M | 162.9 | 65.9 | 24.83 | 26.9 | 87.2 | 137 | 87 | 103.7 | 58  | 10.3 | 7.5 | 4.2 | 1.3 | 0.8 | 19 | 12 | 136 | 325 | 215 | 163 | 73 | 109 | 8.9 | 66.1 | 520 | 16.5 | 49   | 24.5 | 265 | 14.7 | 0.67 | 140 | 4.3 | 101 | 9.6  | 5.2 | 37  | 20   | 20.5 | 1   | 0.8 |
| 65 M | 164.1 | 53.3 | 19.79 | 21   | 75.5 | 106 | 63 | 77.33 | 57  | 5.3  | 7.4 | 4.2 | 1.3 | 0.6 | 14 | 11 | 12  | 337 | 205 | 342 | 44 | 104 | 5.2 | 50.3 | 504 | 14.3 | 43.3 | 24.3 | 322 | 12.9 | 0.77 | 140 | 3.8 | 99  | 9.3  | 5.7 | 58  | 13.1 | 7.8  | 0.7 | 0.7 |
| 60 M | 171.7 | 66.5 | 22.56 | 20.6 | 84.2 | 147 | 67 | 93.67 | 57  | 25.8 | 7.7 | 4.7 | 1.6 | 0.9 | 28 | 18 | 44  | 219 | 195 | 129 | 73 | 92  | 5.5 | 41.2 | 440 | 14.9 | 46.1 | 22.9 | 217 | 12.6 | 0.85 | 140 | 4.1 | 97  | 9.8  | 5.2 | 77  | 12.6 | 12.5 | 1.1 | 0.8 |
| 62 F | 155.2 | 46.5 | 19.3  | 21.5 | 78   | 127 | 86 | 99.67 | 60  | 15.1 | 7.1 | 4.5 | 1.7 | 0.8 | 30 | 36 | 19  | 305 | 231 | 127 | 74 | 126 | 5.2 | 42.1 | 506 | 15.4 | 47.2 | 17.8 | 238 | 9.6  | 0.51 | 141 | 3.6 | 100 | 10.5 | 3.8 | 109 | 11.4 | 13.5 | 0.6 | 0.8 |
| 60 M | 172.1 | 80.4 | 27.15 | 25.9 | 93.4 | 135 | 87 | 103   | 95  | 5.1  | 7.1 | 4.5 | 1.7 | 0.9 | 27 | 29 | 96  | 278 | 180 | 409 | 49 | 56  | 5.4 | 64   | 528 | 16.7 | 48.8 | 20.1 | 282 | 12   | 0.84 | 139 | 4.2 | 99  | 9.6  | 6.1 | 71  | 11.6 | 12.3 | 0.6 | 0.8 |
| 68 F | 151   | 46   | 20.17 | 28.4 | 80.6 | 136 | 74 | 94.67 | 75  | 17   | 8   | 4.5 | 1.3 | 0.5 | 23 | 13 | 19  | 278 | 212 | 127 | 68 | 107 | 5.3 | 60.1 | 477 | 14.3 | 44.4 | 20.8 | 291 | 13.6 | 0.71 | 143 | 4   | 103 | 9.5  | 5.1 | 72  | 14.9 | 12.7 | 0.7 | 0.8 |
| 60 F | 155.3 | 61.9 | 25.67 | 37.5 | 82.2 | 118 | 62 | 80.67 | 63  | 21.3 | 7.6 | 4.2 | 1.2 | 0.6 | 18 | 16 | 17  | 293 | 208 | 86  | 62 | 125 | 7.8 | 63.9 | 409 | 12.4 | 38.6 | 32.4 | 254 | 18.5 | 0.73 | 143 | 3.8 | 104 | 9    | 5.2 | 108 | 13.3 | 13.9 | 0.8 | 0.8 |
| 66 M | 168.9 | 83.9 | 29.41 | 26.4 | 106  | 145 | 85 | 105   | 68  | 17   | 7.7 | 4.2 | 1.2 | 1.5 | 44 | 49 | 79  | 218 | 201 | 80  | 69 | 109 | 5.6 | 73.5 | 498 | 16.4 | 47.9 | 15.5 | 269 | 10.9 | 0.62 | 140 | 3.9 | 101 | 9.3  | 3.5 | 103 | 14.2 | 14.4 | 0.8 | 1   |
| 60 F | 158.9 | 47   | 18.61 | 22.5 | 70   | 103 | 61 | 75    | 74  | 6    | 8.6 | 4.9 | 1.3 | 0.9 | 32 | 28 | 27  | 181 | 260 | 82  | 82 | 140 | 5   | 46.5 | 473 | 14.9 | 44.5 | 23.8 | 257 | 11.2 | 0.41 | 141 | 3.6 | 99  | 10   | 4.4 | 136 | 12.6 | 11.5 | 0.7 | 0.7 |
| 71 F | 166.1 | 53.5 | 19.39 | 23.6 | 77.5 | 127 | 73 | 91    | 70  | 25.1 | 7.8 | 4.5 | 1.4 | 1.2 | 23 | 19 | 15  | 257 | 209 | 68  | 79 | 108 | 5.7 | 75.5 | 456 | 14.8 | 45.4 | 19.3 | 322 | 11.1 | 0.51 | 142 | 3.9 | 99  | 9.4  | 4.6 | 100 | 16.2 | 15   | 0.6 | 0.7 |
| 59 F | 146.6 | 61   | 28.38 | 40.2 | 89   | 98  | 59 | 72    | 57  | 9.9  | 7.9 | 4.4 | 1.3 | 0.7 | 36 | 61 | 72  | 216 | 242 | 125 | 54 | 160 | 7   | 83.6 | 496 | 15.9 | 45.9 | 26   | 311 | 10.9 | 0.44 | 140 | 3.7 | 102 | 9.2  | 4.9 | 33  | 13.9 | 14.9 | 0.7 | 0.7 |
| 63 M | 158.6 | 48.8 | 19.4  | 15.2 | 74.7 | 114 | 60 | 78    | 55  | 9.6  | 8   | 4.9 | 4.6 | 0.7 | 26 | 13 | 22  | 231 | 211 | 106 | 78 | 110 | 5.6 | 58.8 | 493 | 14.8 | 45.4 | 15   | 222 | 14.3 | 0.83 | 140 | 3.8 | 99  | 9.5  | 6.7 | 112 | 20.8 | 19.4 | 1.2 | 0.8 |
| 65 M | 175.2 | 79.1 | 25.77 | 27.5 | 91   | 144 | 79 | 100.7 | 51  | 41.7 | 7.6 | 4.3 | 1.3 | 0.4 | 33 | 31 | 71  | 239 | 179 | 61  | 66 | 104 | 5.8 | 93.7 | 451 | 14.7 | 44.9 | 19.7 | 257 | 11.5 | 0.66 | 141 | 4.1 | 103 | 9.2  | 5.5 | 65  | 10.4 | 12.1 | 1.2 | 1.4 |
| 75 M | 161.3 | 69   | 26.52 | 24.8 | 88.2 | 144 | 75 | 98    | 63  | 35.5 | 7.5 | 4.7 | 1.7 | 0.7 | 16 | 23 | 65  | 168 | 160 | 73  | 55 | 87  | 5.6 | 42.8 | 459 | 15.1 | 46.3 | 11.9 | 247 | 22.5 | 1.07 | 143 | 3.8 | 103 | 9.1  | 6.8 | 97  | 7.9  | 10.5 | 0.9 | 1.1 |
| 70 F | 154.7 | 48.1 | 20.1  | 21.8 | 77.3 | 143 | 81 | 101.7 | 70  | 111  | 8.4 | 4.3 | 1   | 0.6 | 28 | 17 | 31  | 251 | 170 | 195 | 45 | 69  | 5.6 | 34.4 | 466 | 12.4 | 39.1 | 9.6  | 286 | 22.3 | 0.54 | 139 | 3.7 | 102 | 9.3  | 3.6 | 109 | 12.4 | 13.3 | 0.8 | 0.7 |
| 49 F | 155   | 54.8 | 22.81 | 28.6 | 77.2 | 113 | 66 | 81.67 | 65  | 14.6 | 6.9 | 4.1 | 1.5 | 0.7 | 19 | 20 | 17  | 256 | 231 | 54  | 78 | 135 | 5.4 | 59   | 412 | 12.6 | 39.1 | 40.8 | 269 | 7.7  | 0.52 | 139 | 3.6 | 101 | 9    | 3.4 | 69  | 11.4 | 12.1 | 0.7 | 0.6 |
| 78 M | 154.1 | 48.3 | 20.34 | 20.8 | 73.5 | 156 | 72 | 100   | 65  | 37.5 | 7.1 | 4.1 | 1.4 | 0.9 | 28 | 17 | 28  | 195 | 171 | 105 | 55 | 100 | 5.3 | 71.4 | 519 | 15.7 | 47   | 20.6 | 208 | 11.8 | 0.79 | 140 | 4   | 101 | 9.1  | 7.3 | 71  | 10.8 | 12.6 | 0.8 | 0.9 |
| 79 F | 145.2 | 49.9 | 23.67 | 31.3 | 86.3 | 160 | 75 | 103.3 | 61  | 97   | 7.6 | 4   | 1.1 | 1.3 | 21 | 14 | 17  | 182 | 240 | 132 | 41 | 167 | 5.1 | 44.3 | 392 | 13.3 | 40.3 | 26.5 | 254 | 16.6 | 0.76 | 140 | 4.7 | 103 | 9.5  | 3.4 | 79  | 14   | 12.8 | 1.1 | 1.2 |
| 69 F | 158.5 | 53.5 | 21.3  | 23.8 | 80   | 122 | 64 | 83.33 | 78  | 24.3 | 7.5 | 4.3 | 1.3 | 0.7 | 24 | 18 | 17  | 214 | 250 | 99  | 63 | 156 | 5.3 | 57.9 | 441 | 13.5 | 42.3 | 15.4 | 277 | 19.7 | 0.83 | 140 | 4   | 99  | 9.4  | 5.5 | 95  | 10.4 | 12.3 | 0.7 | 0.8 |
| 49 F | 159.3 | 53.9 | 21.24 | 25.6 | 74.7 | 95  | 54 | 67.67 | 61  | 33.2 | 7.6 | 4.3 | 1.3 | 0.5 | 22 | 16 | 13  | 118 | 223 | 28  | 97 | 105 | 5.4 | 48.3 | 420 | 9.7  | 32   | 28.1 | 244 | 11.1 | 0.55 | 139 | 4   | 101 | 9    | 3.1 | 71  | 11.3 | 12.1 | 0.6 | 0.6 |
| 70 F | 155.7 | 54.6 | 22.52 | 34.7 | 85.8 | 144 | 83 | 103.3 | 56  | 45.7 | 6.8 | 4.2 | 1.6 | 1   | 23 | 17 | 54  | 172 | 215 | 83  | 72 | 121 | 5.2 | 75.3 | 473 | 14.7 | 44.6 | 20.4 | 282 | 15.6 | 0.71 | 140 | 3.9 | 99  | 9.2  | 5   | 77  | 15   | 16.7 | 1   | 2.3 |
| 69 F | 148.5 | 43.4 | 19.68 | 23.3 | 80   | 127 | 64 | 85    | 67  | 25   | 6.9 | 3.9 | 1.3 | 0.6 | 20 | 15 | 13  | 169 | 193 | 93  | 60 | 112 | 5.3 | 57.4 | 393 | 12.3 | 37.7 | 19.8 | 482 | 11.9 | 0.52 | 141 | 3.7 | 101 | 8.5  | 3.8 | 97  | 12.5 | 15.9 | 1.7 | 0.7 |
| 81 M | 162.9 | 56.4 | 21.25 | 16   | 84.2 | 154 | 82 | 106   | 81  | 19.6 | 7.2 | 4.6 | 1.8 | 0.6 | 25 | 17 | 21  | 269 | 216 | 200 | 52 | 140 | 5.8 | 92.6 | 410 | 13.1 | 38.6 | 15.4 | 301 | 12.2 | 0.88 | 139 | 3.7 | 100 | 9.3  | 4.2 | 151 | 11.1 | 11.9 | 2.6 | 1.8 |
| 75 F | 148.9 | 42.3 | 19.08 | 18.5 | 68.5 | 153 | 81 | 105   | 79  | 30.5 | 7.3 | 4.1 | 1.3 | 0.5 | 23 | 15 | 15  | 272 | 207 | 91  | 74 | 109 | 5.8 | 49.1 | 363 | 11.2 | 35.5 | 32.6 | 368 | 10.4 | 0.63 | 141 | 4.4 | 103 | 9.5  | 4.7 | 109 | 10.9 | 11.1 | 0.7 | 0.8 |
| 61 M | 170.7 | 73.1 | 25.09 | 21.7 | 94.2 | 139 | 87 | 104.3 | 76  | 12.9 | 7.5 | 4.6 | 1.6 | 1.1 | 24 | 25 | 225 | 239 | 251 | 251 | 49 | 154 | 5.3 | 59.3 | 515 | 15.2 | 45.2 | 20   | 257 | 11   | 0.69 | 139 | 3.4 | 100 | 8.7  | 3.9 | 118 | 18.4 | 17.6 | 0.6 | 0.8 |
| 70 M | 165.7 | 70.9 | 25.82 | 32.5 | 92.8 | 123 | 75 | 91    | 55  | 8.7  | 7.5 | 4.5 | 1.5 | 0.8 | 52 | 97 | 242 | 309 | 173 | 59  | 52 | 102 | 5.2 | 52.9 | 501 | 15.7 | 45.1 | 15.7 | 375 | 19.4 | 0.87 | 140 | 3.7 | 101 | 9.1  | 7   | 74  | 10.5 | 9.3  | 0.7 | 0.8 |
| 78 F | 145.7 | 45.9 | 21.62 | 28.3 | 80.5 | 142 | 91 | 108   | 89  | 14.2 | 7.8 | 4.8 | 1.6 | 0.9 | 29 | 43 | 64  | 254 | 258 | 148 | 68 | 149 | 6   | 46.2 | 510 | 15.1 | 45.8 | 21.2 | 227 | 14.8 | 0.59 | 141 | 4.3 | 102 | 9.6  | 3.8 | 58  | 14.7 | 16.3 | 1   | 1.4 |
| 63 F | 158.5 | 55.1 | 21.93 | 27.8 | 87.3 | 141 | 84 | 103   | 103 | 12.6 | 7.7 | 4.7 | 1.6 | 0.6 | 19 | 19 | 45  | 234 | 238 | 152 | 5  | 143 | 5.3 | 83.7 | 473 | 14.6 | 45.9 | 16.3 | 254 | 19.1 | 0.64 | 140 | 3.8 | 101 | 9.7  | 4.6 | 84  | 11.8 | 10.3 | 0.8 | 0.8 |
| 63 M | 164.1 | 64.4 | 23.91 | 26.9 | 89.7 | 159 | 96 | 117   | 68  | 136  | 7.2 | 4.3 | 1.5 | 0.6 | 17 | 17 | 117 | 256 | 201 | 186 | 70 | 107 | 5.2 | 94.8 | 424 | 14.4 | 44.3 | 25.9 | 388 | 9.1  | 0.83 | 142 | 4   | 105 | 9.1  | 4.4 | 68  | 10.8 | 11.1 | 0.7 | 1.1 |
| 57 F | 168.5 | 75.6 | 26.63 | 38.5 | 102  | 127 | 75 | 92.33 | 51  | 9.9  | 7.8 | 4.7 | 1.5 | 0.8 | 22 | 17 | 15  | 277 | 276 | 89  | 62 | 189 | 5.6 | 48.2 | 477 | 14.8 | 44.9 | 20.6 | 334 | 16.6 | 0.6  | 138 | 4   | 102 | 10.6 | 4.6 | 59  | 9.9  | 9.4  | 1   | 1.2 |
| 60 M | 175.9 | 67.2 | 21.72 | 16.9 | 83.5 | 128 | 82 | 97.33 | 45  | 36.9 | 7.4 | 4.6 | 1.6 | 0.6 | 18 | 21 | 25  | 229 | 173 | 155 | 42 | 114 | 5.3 | 55   | 490 | 15.6 | 47.6 | 18.9 | 306 | 10.4 | 0.75 | 142 | 4   | 99  | 9.2  | 6.2 | 57  | 14.3 | 16.1 | 0.9 | 1   |
| 61 F | 154.9 | 52.2 | 21.76 | 28.9 | 81   | 120 | 72 | 88    | 57  | 5.8  | 7.9 | 4.6 | 1.4 | 0.8 | 22 | 17 | 23  | 275 | 235 | 99  | 61 | 132 | 5.4 | 57.7 | 485 | 14.2 | 43.4 | 21.9 | 322 | 15.9 | 0.61 | 140 | 3.9 | 100 | 9.5  | 4.5 | 94  | 8.6  | 7.7  | 0.8 | 1.2 |
| 33 M | 178.7 | 64.1 | 20.07 | 17.5 | 71.3 | 128 | 81 | 96.67 | 67  | 2.8  | 7.6 | 4.9 | 1.8 | 1   | 25 | 17 | 23  | 160 | 188 | 82  | 58 | 115 | 4.9 | 65.2 | 491 | 15.2 | 44.3 | 21.9 | 179 | 11.4 | 0.9  | 139 | 4.4 | 100 | 9.6  | 5.1 | 93  | 14.8 | 11.6 | 0.6 | 0.6 |
| 72 F | 158.1 | 40.9 | 16.36 | 17.1 | 68.5 | 126 | 61 | 82.67 | 67  | 52.8 | 7.4 | 4.6 | 1.6 | 0.7 | 31 | 19 | 21  | 219 | 201 | 94  | 98 | 80  | 5   | 25.5 | 395 | 13.6 | 40.1 | 12.7 | 241 | 12.8 | 0.67 | 140 | 4.1 | 100 | 9.4  |     |     |      |      |     |     |

|      |       |      |       |      |      |     |    |       |    |      |     |     |     |     |    |    |     |     |     |     |     |     |     |       |     |      |      |      |     |      |      |     |     |     |      |     |     |      |      |     |     |
|------|-------|------|-------|------|------|-----|----|-------|----|------|-----|-----|-----|-----|----|----|-----|-----|-----|-----|-----|-----|-----|-------|-----|------|------|------|-----|------|------|-----|-----|-----|------|-----|-----|------|------|-----|-----|
| 50 M | 168.9 | 76.8 | 26.92 | 31.1 | 92.5 | 120 | 73 | 88.67 | 61 | 3.8  | 7.3 | 4.6 | 1.7 | 1   | 18 | 27 | 37  | 176 | 229 | 139 | 57  | 135 | 5.4 | 65.7  | 479 | 14.5 | 43.9 | 26.5 | 250 | 10.4 | 0.65 | 141 | 3.9 | 102 | 9.5  | 6   | 74  | 14.4 | 14.3 | 0.8 | 0.7 |
| 45 F | 164   | 56.2 | 20.9  | 27.2 | 83.5 | 122 | 68 | 86    | 64 | 16.5 | 6.8 | 4.1 | 1.5 | 0.7 | 14 | 12 | 12  | 123 | 184 | 70  | 71  | 82  | 5.2 | 42.9  | 441 | 14   | 41.6 | 17.2 | 240 | 15.8 | 0.67 | 141 | 4.3 | 105 | 8.8  | 4.7 | 91  | 16.2 | 12   | 0.7 | 0.7 |
| 72 M | 162.8 | 53.4 | 20.15 | 11.2 | 69   | 102 | 51 | 68    | 73 | 300  | 6.5 | 3.7 | 1.3 | 0.5 | 29 | 22 | 43  | 291 | 227 | 87  | 54  | 144 | 5.9 | 35.9  | 381 | 12.6 | 38.7 | 16.1 | 307 | 17.5 | 0.96 | 143 | 3.9 | 106 | 8.8  | 6.2 | 84  | 8.7  | 7.7  | 1.8 | 1.8 |
| 72 F | 146.9 | 45.6 | 21.13 | 26.8 | 81.3 | 113 | 60 | 77.67 | 72 | 10   | 7.1 | 4.1 | 1.4 | 0.8 | 18 | 23 | 14  | 128 | 212 | 87  | 81  | 107 | 5.4 | 59.8  | 440 | 13.1 | 39.6 | 22.7 | 307 | 15.2 | 0.61 | 143 | 3.7 | 102 | 9.1  | 5   | 105 | 8.5  | 10.2 | 1.1 | 1   |
| 67 M | 166.5 | 64   | 23.09 | 22.6 | 92.5 | 124 | 70 | 88    | 52 | 4.7  | 7   | 4.3 | 1.6 | 0.8 | 22 | 22 | 40  | 137 | 212 | 78  | 51  | 145 | 5.5 | 48.3  | 480 | 14.6 | 43.6 | 21.1 | 275 | 19.1 | 0.79 | 143 | 3.8 | 104 | 9.3  | 4.9 | 46  | 11.4 | 12   | 1.2 | 1.4 |
| 67 F | 151.3 | 55   | 24.03 | 34   | 82.5 | 141 | 86 | 104.3 | 63 | 18.4 | 7   | 4.3 | 1.6 | 0.6 | 19 | 12 | 26  | 179 | 255 | 138 | 92  | 141 | 5.6 | 56.4  | 415 | 13.3 | 39.9 | 22.1 | 218 | 12.2 | 0.53 | 142 | 4.1 | 103 | 9.1  | 3.4 | 91  | 14.2 | 12.5 | 1.1 | 1.5 |
| 67 M | 165.3 | 73.7 | 26.97 | 21.9 | 96.5 | 143 | 97 | 112.3 | 73 | 8.3  | 7.4 | 4.3 | 1.4 | 0.5 | 29 | 25 | 85  | 230 | 229 | 287 | 53  | 130 | 6.1 | 62    | 434 | 14   | 40   | 25.3 | 264 | 17.3 | 0.89 | 140 | 4.4 | 102 | 9.7  | 6.1 | 120 | 16.4 | 13.2 | 1.1 | 2   |
| 79 F | 144.1 | 36.2 | 17.43 | 17.8 | 73.5 | 132 | 71 | 91.33 | 78 | 14.7 | 7.3 | 4.4 | 1.5 | 0.5 | 23 | 19 | 16  | 204 | 202 | 83  | 88  | 52  | 6.1 | 53    | 442 | 13.3 | 40.3 | 18.9 | 297 | 16.2 | 0.5  | 143 | 4   | 103 | 9.5  | 4.6 | 109 | 11.8 | 12.9 | 1.4 | 1   |
| 78 M | 156.1 | 58   | 23.8  | 17.7 | 82.3 | 135 | 82 | 99.67 | 57 | 27.4 | 6.5 | 3.8 | 1.4 | 0.6 | 29 | 15 | 63  | 286 | 180 | 39  | 74  | 83  | 5.1 | 48.6  | 385 | 13.5 | 39.8 | 21.4 | 312 | 14.2 | 0.6  | 144 | 4.1 | 105 | 8.7  | 5.6 | 68  | 12.4 | 17.4 | 2.8 | 2.6 |
| 75 F | 150   | 40.5 | 18    | 19.1 | 82.5 | 133 | 87 | 102.3 | 66 | 28.4 | 7   | 4.1 | 1.4 | 0.6 | 24 | 22 | 30  | 215 | 218 | 65  | 81  | 104 | 5.2 | 48.5  | 395 | 13.3 | 39.1 | 24.6 | 250 | 14.6 | 0.47 | 144 | 3.9 | 105 | 8.7  | 3.4 | 96  | 16   | 15.9 | 0.7 | 0.7 |
| 58 M | 166.9 | 61.2 | 21.97 | 17.3 | 81   | 159 | 79 | 105.7 | 57 | 7.8  | 7.3 | 4.4 | 1.5 | 0.4 | 36 | 25 | 23  | 164 | 143 | 87  | 52  | 74  | 5.3 | 46.8  | 460 | 15.4 | 45.5 | 19.3 | 226 | 12.4 | 0.8  | 144 | 4   | 105 | 8.8  | 4.8 | 88  | 9.8  | 8.1  | 0.9 | 0.8 |
| 74 F | 144.1 | 45.4 | 21.86 | 26.4 | 84   | 155 | 87 | 109.7 | 79 | 18.8 | 7.5 | 4.4 | 1.4 | 0.6 | 34 | 36 | 24  | 166 | 216 | 79  | 65  | 123 | 5.2 | 59.3  | 448 | 13.6 | 42.4 | 22   | 271 | 17.3 | 0.77 | 137 | 3.9 | 96  | 9.3  | 6.2 | 63  | 9.3  | 10   | 0.6 | 0.8 |
| 66 F | 146.9 | 39.9 | 18.49 | 17.3 | 69   | 131 | 75 | 93.67 | 63 | 35.3 | 6.7 | 4.1 | 1.6 | 0.6 | 27 | 21 | 17  | 352 | 259 | 46  | 112 | 124 | 5.5 | 45.9  | 431 | 11.9 | 37.2 | 28.4 | 257 | 14.7 | 0.48 | 142 | 4.3 | 102 | 9.1  | 2.8 | 150 | 16.4 | 17.3 | 2   | 0.8 |
| 61 M | 167.5 | 63.9 | 22.78 | 22.2 | 90.2 | 109 | 72 | 84.33 | 73 | 25.7 | 7.7 | 4.3 | 1.3 | 0.3 | 19 | 12 | 25  | 205 | 178 | 151 | 40  | 114 | 5.6 | 53    | 461 | 14.4 | 43   | 21.1 | 297 | 17.5 | 0.71 | 141 | 4.2 | 105 | 9.3  | 5.6 | 112 | 14.9 | 15.2 | 0.9 | 0.8 |
| 59 M | 159   | 60   | 23.73 | 21.6 | 84.3 | 168 | 89 | 115.3 | 60 | 11.1 | 7.3 | 4.3 | 1.4 | 0.5 | 22 | 10 | 35  | 266 | 216 | 229 | 64  | 106 | 5.5 | 52.9  | 438 | 14.1 | 43.4 | 21   | 340 | 17.3 | 0.88 | 141 | 4   | 99  | 9.5  | 6.7 | 62  | 20   | 20   | 0.9 | 0.8 |
| 58 M | 169.2 | 73.9 | 25.81 | 22.8 | 86   | 126 | 80 | 95.33 | 65 | 10.5 | 6.6 | 4.3 | 1.9 | 0.9 | 24 | 28 | 68  | 197 | 225 | 97  | 61  | 150 | 6   | 42.7  | 487 | 15.9 | 47   | 15.4 | 201 | 28.6 | 0.87 | 143 | 4.3 | 106 | 9.3  | 4.7 | 97  | 7.8  | 9.7  | 0.8 | 0.8 |
| 63 F | 150.6 | 61.1 | 26.94 | 32.7 | 85   | 127 | 67 | 87    | 84 | 8.1  | 7.1 | 4.3 | 1.5 | 0.6 | 21 | 14 | 11  | 158 | 255 | 44  | 77  | 157 | 5.4 | 41.6  | 418 | 13.3 | 38.6 | 19.8 | 294 | 10.8 | 0.73 | 141 | 4.4 | 104 | 9.6  | 6   | 45  | 18.9 | 8.9  | 1   | 0.8 |
| 53 M | 161.7 | 61.2 | 23.41 | 21.7 | 84.8 | 149 | 76 | 100.3 | 71 | 5.7  | 7.2 | 4.5 | 1.7 | 0.4 | 35 | 41 | 82  | 368 | 202 | 363 | 61  | 89  | 6.1 | 58.8  | 479 | 15.1 | 45   | 26.3 | 223 | 15   | 0.8  | 141 | 4.4 | 103 | 9.4  | 6.5 | 43  | 8.1  | 9    | 1.2 | 1   |
| 73 F | 145.4 | 48.5 | 22.94 | 28.3 | 89   | 148 | 83 | 104.7 | 65 | 8.9  | 7.4 | 4.4 | 1.5 | 0.6 | 17 | 15 | 43  | 265 | 238 | 125 | 48  | 146 | 5.2 | 59.4  | 418 | 13.3 | 39.5 | 20.3 | 302 | 14.5 | 0.64 | 143 | 3.9 | 104 | 9.2  | 4.3 | 78  | 14.2 | 11.3 | 0.9 | 1.8 |
| 38 F | 164.1 | 52.6 | 19.53 | 23.8 | 80   | 104 | 62 | 76    | 58 | 5.5  | 7.1 | 4.3 | 1.5 | 0.6 | 18 | 12 | 10  | 137 | 168 | 107 | 57  | 86  | 5.1 | 56.2  | 433 | 11.8 | 36.7 | 19.2 | 201 | 9.9  | 0.53 | 139 | 3.8 | 105 | 8.9  | 2.9 | 84  | 12.3 | 10.2 | 0.8 | 0.7 |
| 56 M | 154.1 | 72.9 | 30.7  | 25.9 | 94   | 136 | 94 | 108   | 70 | 3.8  | 6.8 | 4.2 | 1.6 | 0.7 | 21 | 29 | 34  | 163 | 200 | 104 | 50  | 128 | 5.7 | 57.9  | 476 | 15.1 | 44.8 | 21.5 | 237 | 14.5 | 0.84 | 144 | 3.7 | 107 | 8.9  | 5.6 | 105 | 8.7  | 9.6  | 1   | 1.2 |
| 55 M | 158.1 | 54.8 | 21.92 | 19.5 | 79.8 | 118 | 67 | 84    | 54 | 6.6  | 7.3 | 4.3 | 1.4 | 0.6 | 20 | 14 | 16  | 183 | 247 | 96  | 67  | 161 | 5   | 48.5  | 452 | 14.4 | 42.6 | 22.6 | 210 | 10.4 | 1.03 | 142 | 4.5 | 106 | 9.8  | 4.7 | 92  | 14.9 | 12.7 | 0.8 | 0.8 |
| 37 M | 172.8 | 61.7 | 20.66 | 22.2 | 76.8 | 117 | 67 | 83.67 | 54 | 8.3  | 7.5 | 4.6 | 1.6 | 0.5 | 26 | 46 | 92  | 216 | 214 | 88  | 48  | 148 | 5.2 | 61.7  | 505 | 15.4 | 45.1 | 16.3 | 246 | 15.7 | 0.85 | 143 | 3.8 | 105 | 9.1  | 5.7 | 82  | 13.2 | 14.6 | 0.6 | 0.8 |
| 61 M | 180.9 | 86.6 | 26.46 | 26   | 97.3 | 130 | 74 | 92.67 | 49 | 13.5 | 7.2 | 4   | 1.3 | 0.7 | 17 | 13 | 23  | 182 | 202 | 93  | 50  | 133 | 5.2 | 57    | 459 | 13.8 | 41   | 28.5 | 234 | 11.2 | 1.03 | 144 | 4.2 | 107 | 9.3  | 7   | 98  | 14.1 | 12.8 | 1.9 | 0.8 |
| 69 F | 151.1 | 60.2 | 26.37 | 35.7 | 90.5 | 154 | 79 | 104   | 63 | 28.1 | 7.8 | 4.2 | 1.2 | 0.7 | 29 | 30 | 27  | 247 | 193 | 322 | 35  | 116 | 5.6 | 55.8  | 536 | 15.2 | 47.5 | 20.4 | 240 | 16.9 | 0.63 | 142 | 4.6 | 102 | 9.4  | 4.6 | 87  | 11.2 | 14.4 | 3.1 | 1.3 |
| 67 M | 167.8 | 54.6 | 19.39 | 16.5 | 75.5 | 139 | 68 | 91.67 | 54 | 8.3  | 7.3 | 3.7 | 1   | 0.6 | 33 | 28 | 163 | 476 | 190 | 78  | 64  | 105 | 5.7 | 56.7  | 417 | 13.3 | 39.5 | 19.5 | 312 | 15.4 | 0.77 | 142 | 3.8 | 103 | 8.8  | 4.4 | 99  | 13.6 | 16.6 | 2.2 | 2.4 |
| 63 M | 162.1 | 71.7 | 27.29 | 29.4 | 91.8 | 121 | 67 | 85    | 66 | 15.6 | 7.4 | 4.2 | 1.3 | 0.7 | 21 | 33 | 28  | 311 | 228 | 121 | 50  | 157 | 6.7 | 65.6  | 500 | 16.1 | 47.5 | 23.6 | 302 | 10.9 | 0.64 | 143 | 3.8 | 102 | 9.3  | 4.4 | 63  | 17.2 | 17.1 | 0.8 | 1   |
| 58 F | 158.5 | 53.1 | 21.14 | 25.9 | 82   | 117 | 69 | 85    | 57 | 27   | 7.8 | 4.5 | 1.4 | 1.1 | 19 | 17 | 14  | 240 | 204 | 34  | 83  | 102 | 5.4 | 55.4  | 470 | 14.4 | 42.4 | 25.5 | 246 | 9.6  | 0.51 | 141 | 3.8 | 105 | 9.1  | 3   | 65  | 9.6  | 11   | 1   | 1   |
| 42 M | 171.7 | 85   | 28.83 | 32.4 | 97.5 | 147 | 86 | 106.3 | 72 | 2.4  | 7.8 | 4.5 | 1.4 | 0.8 | 25 | 38 | 162 | 272 | 191 | 550 | 42  | 90  | 5.1 | 93.1  | 505 | 17.2 | 48.4 | 29.8 | 237 | 9.6  | 0.74 | 140 | 3.9 | 102 | 9.4  | 6.3 | 53  | 13.1 | 15.3 | 0.8 | 0.7 |
| 37 M | 174.1 | 63.9 | 21.08 | 23.5 | 81.3 | 111 | 66 | 81    | 68 | 2    | 8.2 | 4.9 | 1.5 | 0.5 | 21 | 20 | 25  | 243 | 220 | 572 | 40  | 87  | 5.3 | 105.2 | 525 | 16.3 | 49.1 | 16   | 226 | 14.6 | 0.72 | 140 | 4.1 | 100 | 10.2 | 6.6 | 61  | 8.9  | 10.2 | 0.9 | 0.7 |
| 53 M | 174.5 | 65.9 | 21.64 | 18.2 | 77.8 | 147 | 89 | 108.3 | 68 | 7.5  | 6.3 | 4.1 | 1.9 | 1.7 | 21 | 21 | 42  | 191 | 197 | 57  | 95  | 80  | 4.9 | 42.1  | 468 | 15.5 | 46   | 18.1 | 213 | 12.8 | 0.79 | 143 | 3.9 | 108 | 9.1  | 4.9 | 99  | 12.5 | 13.9 | 1   | 0.8 |
| 61 F | 159.6 | 45.5 | 17.86 | 19.4 | 68.7 | 94  | 49 | 64    | 61 | 4.4  | 8   | 4.7 | 1.4 | 0.7 | 24 | 29 | 48  | 248 | 273 | 108 | 72  | 178 | 5.6 | 65.9  | 469 | 14.1 | 42.3 | 23.4 | 271 | 17   | 0.7  | 144 | 3.8 | 104 | 10.4 | 6.6 | 53  | 10.2 | 11.4 | 0.8 | 0.9 |
| 65 M | 172.4 | 64.3 | 21.63 | 16.5 | 82.5 | 135 | 71 | 92.33 | 48 | 30.6 | 7.1 | 4.2 | 1.4 | 0.6 | 17 | 11 | 34  | 172 | 232 | 122 | 78  | 132 | 5.4 | 51.2  | 412 | 13.5 | 40.8 | 25.6 | 288 | 22   | 0.77 | 142 | 4.1 | 104 | 9.8  | 6.7 | 97  | 11.4 | 8.4  | 2.2 | 1.1 |
| 78 F | 146.7 | 48.4 | 22.49 | 30.6 | 90.5 | 120 | 60 | 80    | 66 | 41.4 | 7.7 | 4.3 | 1.3 | 0.5 | 19 | 11 | 19  | 211 | 205 | 92  | 76  | 103 | 5.6 | 86.5  | 409 | 12.6 | 38.3 | 30.5 | 406 | 13.7 | 0.71 | 140 | 4.2 | 103 | 9.4  | 5.8 | 97  | 12.1 | 14.2 | 3.1 | 3.1 |
| 74 F | 153.7 | 59   | 24.97 | 33   | 93   | 111 | 58 | 75.67 | 51 | 33.9 | 7.6 | 4.3 | 1.3 | 0.8 | 18 | 18 | 20  | 242 | 252 | 200 | 48  | 144 | 6.2 | 69.6  | 414 | 12.9 | 38.7 | 19.5 | 253 | 17.4 | 0.83 | 143 | 4.2 | 106 | 9.8  | 5   | 58  | 14   | 16.4 | 2.8 | 2.5 |
| 63 M | 162.9 | 59.4 | 22.38 | 14.4 | 78   | 128 | 73 | 91.33 | 57 | 12.6 | 6.8 | 4.1 | 1.5 | 1.1 | 26 | 19 | 27  | 224 | 247 | 106 | 67  | 157 | 5.9 | 72.3  | 480 | 15.2 | 44.5 | 22.3 | 250 | 16.7 | 0.83 | 141 | 3.8 | 104 | 9.3  | 5.9 | 72  | 7.9  | 9.3  | 1.7 | 2   |

|      |       |       |       |      |       |     |    |       |    |      |     |     |     |     |    |    |     |     |     |     |    |     |     |      |     |      |      |      |     |      |      |     |     |     |      |     |     |      |      |     |     |
|------|-------|-------|-------|------|-------|-----|----|-------|----|------|-----|-----|-----|-----|----|----|-----|-----|-----|-----|----|-----|-----|------|-----|------|------|------|-----|------|------|-----|-----|-----|------|-----|-----|------|------|-----|-----|
| 63 F | 154.1 | 62.5  | 26.32 | 35.2 | 92.5  | 132 | 64 | 86.67 | 78 | 12.4 | 7.9 | 4.6 | 1.4 | 0.4 | 20 | 15 | 14  | 272 | 217 | 88  | 57 | 129 | 6.7 | 84.2 | 478 | 13.5 | 41.9 | 27.4 | 307 | 14.1 | 0.73 | 141 | 4.1 | 101 | 9.8  | 5.3 | 103 | 15.3 | 14.6 | 0.9 | 0.7 |
| 68 F | 146.2 | 37.7  | 17.64 | 17.4 | 61.5  | 132 | 69 | 90    | 77 | 15.8 | 7.2 | 4.3 | 1.5 | 0.6 | 23 | 14 | 18  | 124 | 261 | 67  | 84 | 138 | 5.1 | 46.1 | 400 | 12.5 | 38.3 | 23.1 | 260 | 19.4 | 0.48 | 143 | 3.7 | 101 | 9.7  | 4.8 | 101 | 9.6  | 9.3  | 0.9 | 0.8 |
| 64 F | 148.9 | 47.6  | 21.47 | 27.7 | 69.3  | 117 | 72 | 87    | 64 | 16.5 | 7.6 | 4.4 | 1.4 | 0.6 | 30 | 28 | 19  | 421 | 158 | 83  | 53 | 81  | 5.6 | 46.4 | 453 | 14.2 | 43.3 | 27.3 | 213 | 15.6 | 0.58 | 142 | 4.3 | 101 | 9.6  | 5   | 147 | 15   | 14.8 | 1.2 | 0.9 |
| 65 M | 178.9 | 70.7  | 22.09 | 17   | 84.4  | 126 | 76 | 92.67 | 58 | 10.7 | 7.3 | 4.5 | 1.6 | 0.9 | 23 | 19 | 20  | 186 | 198 | 114 | 51 | 123 | 5.9 | 50   | 485 | 15   | 44.5 | 21.9 | 234 | 12.9 | 0.77 | 144 | 3.8 | 101 | 9.5  | 4.8 | 82  | 9.6  | 8.6  | 1   | 0.9 |
| 66 F | 150.4 | 44.1  | 19.5  | 22.4 | 77    | 126 | 62 | 83.33 | 95 | 17.4 | 7.3 | 4.3 | 1.4 | 0.9 | 20 | 22 | 41  | 268 | 260 | 133 | 79 | 129 | 5.4 | 48.1 | 458 | 14.9 | 44.5 | 17.7 | 302 | 16   | 0.66 | 144 | 3.9 | 101 | 9.5  | 4.5 | 109 | 22.2 | 18.8 | 0.6 | 0.8 |
| 56 F | 159.3 | 58.6  | 23.09 | 34   | 89.7  | 116 | 68 | 84    | 68 | 10.6 | 7.9 | 4.5 | 1.3 | 0.5 | 19 | 16 | 16  | 219 | 232 | 56  | 64 | 142 | 5.7 | 65.6 | 455 | 14.3 | 42.1 | 23.3 | 288 | 13.8 | 0.55 | 145 | 4.4 | 102 | 9.8  | 5.1 | 45  | 10.9 | 10.3 | 0.8 | 0.8 |
| 65 M | 171.7 | 68    | 23.07 | 19.8 | 84.6  | 102 | 64 | 76.67 | 55 | 4.7  | 7.1 | 4.4 | 1.6 | 0.8 | 23 | 21 | 40  | 248 | 182 | 99  | 47 | 109 | 5.1 | 48.9 | 483 | 15.9 | 45.4 | 22.1 | 240 | 21   | 0.99 | 142 | 4.3 | 99  | 9.2  | 5.5 | 95  | 11.3 | 8.5  | 0.9 | 0.9 |
| 58 M | 173.5 | 70.9  | 23.55 | 25.6 | 90.6  | 111 | 71 | 84.33 | 58 | 4.8  | 6.9 | 4.5 | 1.9 | 0.7 | 27 | 43 | 116 | 178 | 224 | 134 | 45 | 150 | 5.6 | 59.3 | 515 | 15.4 | 45.6 | 22.3 | 243 | 10.8 | 0.84 | 142 | 4.1 | 101 | 9.2  | 5.3 | 78  | 13.9 | 12.1 | 0.7 | 0.6 |
| 55 F | 157.3 | 43.4  | 17.54 | 21.4 | 73    | 148 | 83 | 104.7 | 58 | 13   | 7.7 | 4.7 | 1.6 | 0.9 | 25 | 24 | 13  | 261 | 275 | 104 | 64 | 184 | 4.9 | 45.1 | 451 | 14.9 | 42.1 | 16.2 | 264 | 13   | 0.46 | 146 | 4.2 | 103 | 9.7  | 3.8 | 177 | 13.5 | 13.5 | 1.4 | 0.8 |
| 42 M | 165.3 | 59.9  | 21.92 | 25.2 | 82.8  | 119 | 76 | 90.33 | 59 | 4.3  | 7.3 | 4.6 | 1.7 | 0.3 | 76 | 98 | 36  | 261 | 283 | 66  | 51 | 236 | 5.6 | 71.8 | 478 | 14.8 | 44.3 | 30.8 | 293 | 20.3 | 0.9  | 144 | 4.1 | 103 | 9.3  | 7.2 | 99  | 10.2 | 10.1 | 0.7 | 0.8 |
| 61 F | 151.8 | 50.5  | 21.92 | 28.1 | 79.8  | 126 | 80 | 95.33 | 70 | 3.8  | 7.1 | 4.4 | 1.6 | 0.7 | 20 | 20 | 30  | 193 | 167 | 82  | 51 | 100 | 5.4 | 58.1 | 421 | 13.3 | 39.8 | 20.3 | 228 | 15.9 | 0.68 | 145 | 3.5 | 105 | 9.5  | 4   | 96  | 12.4 | 8.9  | 0.9 | 0.8 |
| 61 F | 145.8 | 42.8  | 20.13 | 22.9 | 76.5  | 117 | 77 | 90.33 | 84 | 11   | 7.6 | 4.7 | 1.6 | 0.6 | 21 | 17 | 31  | 235 | 215 | 93  | 40 | 153 | 5.8 | 38.7 | 420 | 13   | 38.2 | 23.2 | 257 | 14   | 0.43 | 143 | 3.7 | 103 | 9.5  | 4.1 | 56  | 8    | 8    | 0.9 | 0.8 |
| 59 M | 162.4 | 58    | 21.99 | 26.1 | 87    | 105 | 76 | 85.67 | 75 | 7.7  | 7.8 | 4.6 | 1.4 | 0.4 | 37 | 31 | 30  | 160 | 202 | 135 | 36 | 145 | 7.3 | 53.3 | 481 | 15.2 | 45.6 | 23.8 | 280 | 11.2 | 0.97 | 141 | 4.4 | 103 | 9.8  | 7.5 | 84  | 11.6 | 13.2 | 0.7 | 0.7 |
| 68 F | 145.3 | 49.3  | 23.35 | 29.3 | 87.2  | 135 | 77 | 96.33 | 80 | 10   | 7.3 | 4.4 | 1.5 | 2.1 | 31 | 31 | 29  | 204 | 191 | 99  | 60 | 102 | 5.4 | 42.5 | 407 | 13.1 | 38.9 | 22.9 | 317 | 10.5 | 0.59 | 144 | 3.8 | 106 | 9.8  | 4.3 | 80  | 16.2 | 16.7 | 0.8 | 0.6 |
| 67 M | 162.8 | 54.5  | 20.56 | 15   | 75.5  | 125 | 73 | 90.33 | 70 | 38.3 | 7.1 | 4.1 | 1.4 | 0.8 | 25 | 24 | 37  | 162 | 179 | 85  | 74 | 87  | 5.7 | 34.1 | 499 | 14.7 | 43.9 | 16   | 189 | 12.7 | 0.67 | 143 | 3.8 | 104 | 9.2  | 4.8 | 57  | 9.2  | 9.5  | 0.9 | 1   |
| 59 M | 171.5 | 68.7  | 23.36 | 23.7 | 90.3  | 152 | 88 | 109.3 | 68 | 7    | 7.5 | 4.5 | 1.5 | 0.8 | 26 | 30 | 83  | 240 | 218 | 138 | 60 | 139 | 5.7 | 58.3 | 461 | 15.4 | 44.6 | 20.5 | 243 | 10.4 | 0.78 | 141 | 3.9 | 102 | 9.6  | 7   | 54  | 11.7 | 12.7 | 0.8 | 0.9 |
| 66 M | 157.6 | 62.9  | 25.32 | 28.1 | 90    | 101 | 62 | 75    | 69 | 13.9 | 7.9 | 4.4 | 1.3 | 0.6 | 25 | 21 | 78  | 206 | 230 | 64  | 74 | 133 | 5.5 | 52.7 | 411 | 14.4 | 42   | 23.5 | 250 | 12   | 0.74 | 140 | 4.6 | 102 | 9.5  | 5.9 | 58  | 9.5  | 9.4  | 2   | 1.4 |
| 55 F | 152.9 | 64.9  | 27.76 | 40.1 | 103   | 126 | 76 | 92.67 | 76 | 7    | 7.6 | 4.5 | 1.5 | 2.2 | 18 | 18 | 20  | 217 | 199 | 83  | 50 | 128 | 5.7 | 61.6 | 482 | 14.6 | 43.6 | 21.3 | 250 | 12.2 | 0.58 | 143 | 4   | 104 | 9.8  | 6.8 | 48  | 20   | 19   | 0.9 | 1.2 |
| 52 M | 179.8 | 93    | 28.77 | 32.8 | 102   | 141 | 85 | 103.7 | 71 | 4.4  | 7.8 | 4.7 | 1.5 | 0.5 | 25 | 31 | 27  | 176 | 226 | 110 | 43 | 163 | 5.7 | 78.6 | 515 | 15.3 | 45.6 | 26   | 253 | 18.3 | 0.94 | 143 | 4.7 | 107 | 9.8  | 5   | 63  | 16   | 16   | 0.9 | 1.2 |
| 55 F | 161.4 | 57    | 21.88 | 30   | 87.7  | 145 | 88 | 107   | 77 | 7    | 8   | 4.4 | 1.2 | 0.8 | 21 | 18 | 16  | 274 | 184 | 69  | 68 | 96  | 5.1 | 47.8 | 475 | 14.3 | 41.8 | 19.9 | 260 | 12.6 | 0.54 | 142 | 3.6 | 103 | 9.4  | 6.2 | 60  | 16   | 16   | 0.8 | 0.9 |
| 52 F | 161.7 | 52.8  | 20.19 | 25.6 | 73    | 102 | 58 | 72.67 | 59 | 5.8  | 7.8 | 4.6 | 1.4 | 0.7 | 23 | 21 | 60  | 267 | 185 | 34  | 79 | 85  | 5.4 | 46.6 | 432 | 13.8 | 41.9 | 22.9 | 297 | 19.3 | 0.61 | 140 | 3.8 | 101 | 10.1 | 2.8 | 122 | 14   | 11   | 0.8 | 1.4 |
| 66 M | 155.7 | 64.9  | 26.77 | 34.7 | 96.5  | 109 | 74 | 85.67 | 56 | 4.3  | 7.1 | 4.7 | 2   | 0.6 | 24 | 16 | 28  | 231 | 230 | 95  | 59 | 145 | 6.1 | 87   | 512 | 16.5 | 48.1 | 19.5 | 297 | 22.1 | 0.89 | 143 | 3.8 | 102 | 10.1 | 5.7 | 88  | 15   | 12   | 1.6 | 2.4 |
| 63 M | 164.1 | 65.4  | 24.29 | 20.4 | 79.8  | 113 | 71 | 85    | 57 | 5.7  | 7.5 | 4.2 | 1.3 | 0.5 | 43 | 23 | 147 | 213 | 164 | 84  | 88 | 55  | 5.5 | 31.4 | 473 | 15.2 | 44.5 | 21.2 | 223 | 18.1 | 0.83 | 142 | 5   | 103 | 8.9  | 6.7 | 91  | 10   | 10   | 0.8 | 1   |
| 67 F | 155.3 | 45.7  | 18.95 | 25.1 | 83.5  | 127 | 63 | 84.33 | 93 | 17.8 | 7.8 | 4.5 | 1.4 | 0.6 | 23 | 33 | 29  | 246 | 249 | 116 | 53 | 161 | 6.4 | 42.8 | 425 | 13.9 | 40.1 | 27.2 | 284 | 13.1 | 0.55 | 143 | 4.3 | 104 | 10   | 4   | 32  | 13   | 1.2  | 1   |     |
| 69 M | 167.7 | 68.1  | 24.21 | 29   | 92    | 130 | 80 | 96.67 | 77 | 6.9  | 7.7 | 4.6 | 1.5 | 0.9 | 23 | 23 | 24  | 123 | 250 | 156 | 54 | 167 | 6.6 | 76.6 | 463 | 14.6 | 42.9 | 23.9 | 275 | 19.8 | 1.06 | 140 | 4.3 | 100 | 10   | 7.9 | 67  | 13   | 12   | 0.8 | 0.8 |
| 43 M | 178.1 | 100.4 | 31.65 | 33.4 | 105   | 141 | 82 | 101.7 | 63 | 12.2 | 7.6 | 4.3 | 1.3 | 0.7 | 21 | 22 | 79  | 201 | 222 | 240 | 39 | 132 | 5.3 | 69   | 502 | 16   | 47.4 | 31.2 | 271 | 14.8 | 0.9  | 141 | 4.2 | 104 | 9.6  | 6.3 | 84  | 15   | 16   | 0.7 | 0.8 |
| 67 M | 168.2 | 71.3  | 25.2  | 20.8 | 87.3  | 118 | 70 | 86    | 73 | 3.4  | 7.4 | 4.7 | 1.7 | 0.9 | 25 | 24 | 55  | 229 | 162 | 160 | 47 | 95  | 5.2 | 78.1 | 492 | 16.8 | 48.3 | 24.7 | 317 | 11   | 0.8  | 144 | 4.3 | 105 | 10.2 | 5.3 | 93  | 8    | 10   | 2   | 2.3 |
| 68 F | 152.1 | 59.5  | 25.72 | 31.4 | 92    | 158 | 81 | 106.7 | 68 | 6.2  | 7.4 | 4.2 | 1.3 | 0.4 | 32 | 30 | 18  | 71  | 158 | 72  | 53 | 84  | 5.6 | 41.6 | 384 | 11.8 | 34.4 | 34.6 | 210 | 11.9 | 0.58 | 143 | 4.6 | 107 | 9.4  | 3.2 | 50  | 11   | 13   | 1   | 1.4 |
| 62 F | 154.1 | 61.1  | 25.73 | 38.9 | 95    | 112 | 63 | 79.33 | 59 | 10.4 | 7.7 | 4.3 | 1.3 | 0.9 | 23 | 20 | 16  | 164 | 234 | 54  | 86 | 122 | 6   | 43.9 | 444 | 14.3 | 41.6 | 24.7 | 297 | 20.8 | 0.66 | 143 | 4.1 | 103 | 9.3  | 4.6 | 50  | 14   | 19   | 1.3 | 0.8 |
| 62 F | 156.9 | 64.8  | 26.32 | 35.5 | 87.5  | 106 | 71 | 82.67 | 69 | 5.3  | 7.4 | 4.6 | 1.6 | 0.5 | 16 | 13 | 17  | 238 | 198 | 113 | 45 | 130 | 5.6 | 42.3 | 475 | 14.5 | 43.2 | 24.1 | 260 | 13   | 0.57 | 143 | 4.2 | 106 | 9.4  | 3.2 | 72  | 13   | 12   | 0.6 | 0.5 |
| 73 F | 151.5 | 66.7  | 29.06 | 38.4 | 103.5 | 140 | 71 | 94    | 62 | 83.7 | 7.4 | 4.4 | 1.5 | 1.2 | 20 | 16 | 22  | 184 | 227 | 82  | 68 | 127 | 5.4 | 76.3 | 456 | 14.2 | 42.3 | 19.4 | 302 | 14.6 | 0.62 | 143 | 4.2 | 103 | 9.9  | 5   | 83  | 10   | 13   | 1.6 | 1.2 |
| 58 F | 148.7 | 59.1  | 26.73 | 38.4 | 92.7  | 128 | 67 | 87.33 | 59 | 22   | 7.5 | 4.6 | 1.6 | 0.8 | 17 | 23 | 25  | 306 | 204 | 109 | 69 | 104 | 5.4 | 49.5 | 482 | 14.9 | 43.3 | 24.8 | 268 | 15.2 | 0.61 | 142 | 4   | 101 | 9.9  | 4.9 | 96  | 17   | 18   | 1.2 | 1.2 |
| 62 F | 151.6 | 56.5  | 24.58 | 38.9 | 81    | 117 | 60 | 79    | 62 | 13.8 | 7.6 | 4.4 | 1.4 | 1   | 23 | 21 | 20  | 145 | 195 | 102 | 38 | 126 | 6   | 49.2 | 429 | 12.8 | 38.6 | 31.4 | 312 | 13.1 | 0.53 | 141 | 4   | 103 | 9.3  | 3.9 | 77  | 14   | 14   | 1.8 | 1.1 |
| 52 M | 163.3 | 77.9  | 29.21 | 33.1 | 94.6  | 164 | 96 | 118.7 | 90 | 4.2  | 8.5 | 4.6 | 1.2 | 0.6 | 25 | 27 | 43  | 205 | 193 | 93  | 59 | 111 | 5.4 | 54.4 | 501 | 16.1 | 45.7 | 30.3 | 340 | 12.7 | 0.74 | 142 | 4.2 | 103 | 9.7  | 6.6 | 34  | 16   | 17   | 1   | 0.7 |
| 34 F | 149.2 | 44.3  | 19.9  | 23.5 | 72.6  | 111 | 60 | 77    | 84 | 6.1  | 7.4 | 4.5 | 1.6 | 0.7 | 12 | 10 | 11  | 153 | 206 | 109 | 70 | 107 | 5.3 | 84.5 | 448 | 13.3 | 38.6 | 30.6 | 231 | 16.6 | 0.66 | 139 | 3.7 | 105 | 9.1  | 5.6 | 123 | 15   | 18   | 0.9 | 0.6 |
| 73 M | 157.9 | 59.7  | 23.94 | 28.9 | 90    | 123 | 75 | 91    | 68 | 45.5 | 7.7 | 4.7 | 1.6 | 0.6 | 33 | 48 | 23  | 226 | 233 | 184 | 43 | 165 | 9.7 | 59.3 | 506 | 15.1 | 44.4 | 18.8 | 213 | 18.6 | 0.88 | 140 | 4.3 | 100 | 9.8  | 3.5 | 83  | 15   | 13   | 1.3 | 1.3 |
| 71 F | 144.5 | 49.3  |       |      |       |     |    |       |    |      |     |     |     |     |    |    |     |     |     |     |    |     |     |      |     |      |      |      |     |      |      |     |     |     |      |     |     |      |      |     |     |

|      |       |      |       |      |       |     |    |       |    |        |     |     |     |     |    |    |     |     |     |     |    |     |     |      |     |      |      |      |     |      |      |     |     |     |     |     |     |    |    |     |     |
|------|-------|------|-------|------|-------|-----|----|-------|----|--------|-----|-----|-----|-----|----|----|-----|-----|-----|-----|----|-----|-----|------|-----|------|------|------|-----|------|------|-----|-----|-----|-----|-----|-----|----|----|-----|-----|
| 79 F | 144.4 | 44.7 | 21.44 | 21.4 | 87.7  | 127 | 55 | 79    | 87 | 18.7   | 7.7 | 4.1 | 1.1 | 0.6 | 19 | 13 | 12  | 263 | 187 | 149 | 51 | 102 | 6.9 | 45.1 | 415 | 13.1 | 40   | 24.5 | 306 | 13.6 | 0.63 | 145 | 3.8 | 104 | 9.2 | 3.5 | 81  | 9  | 10 | 1.1 | 3.1 |
| 75 M | 157.8 | 60.3 | 24.22 | 27.3 | 83.2  | 143 | 78 | 99.67 | 53 | 48.1   | 7.4 | 4.4 | 1.5 | 0.4 | 28 | 20 | 21  | 160 | 184 | 60  | 67 | 90  | 5.3 | 48.2 | 466 | 13.9 | 41.2 | 20.3 | 330 | 14.6 | 0.57 | 140 | 4   | 102 | 9.3 | 5.1 | 62  | 17 | 15 | 2.7 | 2.1 |
| 74 F | 146.6 | 39.7 | 18.47 | 22.7 | 77    | 129 | 73 | 91.67 | 55 | 11.1   | 7.4 | 4.3 | 1.4 | 0.4 | 18 | 16 | 21  | 190 | 191 | 198 | 40 | 112 | 6   | 61.6 | 449 | 13.9 | 40.3 | 24.9 | 318 | 13.2 | 0.51 | 142 | 3.7 | 100 | 9   | 4   | 78  | 13 | 12 | 0.8 | 1.4 |
| 71 M | 161.3 | 57.5 | 22.1  | 17.9 | 81.8  | 152 | 75 | 100.7 | 79 | 13.6   | 7.3 | 4.5 | 1.6 | 2.3 | 37 | 41 | 64  | 233 | 178 | 149 | 80 | 68  | 4.9 | 34.8 | 351 | 13.4 | 38.9 | 12.4 | 209 | 16.9 | 0.56 | 141 | 3.9 | 102 | 8.9 | 4.1 | 47  | 9  | 10 | 1.7 | 0.8 |
| 83 M | 158.9 | 51.6 | 20.44 | 20.1 | 78.5  | 133 | 55 | 81    | 53 | 12.5   | 7.7 | 4.6 | 1.5 | 0.7 | 22 | 13 | 23  | 228 | 184 | 120 | 51 | 92  | 6.3 | 58.8 | 447 | 13.5 | 39.7 | 21.4 | 291 | 15.6 | 0.9  | 141 | 4.5 | 102 | 9.7 | 4.8 | 62  | 14 | 12 | 1.1 | 2.7 |
| 75 F | 153.3 | 45   | 19.15 | 24.4 | 79.7  | 139 | 79 | 99    | 70 | 28.7   | 7.6 | 4.3 | 1.3 | 0.6 | 21 | 14 | 17  | 178 | 172 | 132 | 54 | 82  | 5.7 | 62.5 | 393 | 12.4 | 38.7 | 19.5 | 383 | 19.3 | 0.86 | 144 | 5   | 105 | 9.3 | 7.3 | 74  | 10 | 12 | 1.4 | 1.3 |
| 69 M | 153.3 | 54.6 | 23.23 | 20.2 | 84.7  | 131 | 76 | 94.33 | 53 | 7.5    | 7.5 | 4.3 | 1.3 | 0.8 | 27 | 24 | 27  | 289 | 211 | 106 | 46 | 140 | 5.2 | 75.9 | 479 | 16.2 | 48.2 | 21.4 | 268 | 18.7 | 0.97 | 144 | 3.9 | 106 | 9.3 | 6.8 | 97  | 10 | 10 | 1.4 | 1.1 |
| 64 M | 171.5 | 56.4 | 19.18 | 15   | 76    | 106 | 69 | 81.33 | 63 | 6.7    | 7.4 | 4.6 | 1.6 | 0.6 | 31 | 24 | 40  | 133 | 227 | 73  | 94 | 111 | 6.1 | 43.7 | 438 | 15.3 | 44.8 | 20.2 | 245 | 11.8 | 0.76 | 142 | 4   | 100 | 9.3 | 3.7 | 81  | 20 | 12 | 3.4 | 3   |
| 47 M | 164   | 70.9 | 26.36 | 31.5 | 88.5  | 131 | 92 | 105   | 66 | 4.5    | 7.3 | 4.7 | 1.8 | 0.2 | 37 | 58 | 146 | 216 | 160 | 242 | 54 | 78  | 7.6 | 69.9 | 532 | 16.6 | 48.3 | 26.1 | 221 | 16.3 | 0.67 | 141 | 4.7 | 103 | 9.3 | 6.3 | 37  | 18 | 17 | 0.9 | 0.9 |
| 68 F | 148.5 | 44.7 | 20.27 | 25   | 76.7  | 171 | 95 | 120.3 | 65 | 17.8   | 7.8 | 4.4 | 1.3 | 0.7 | 22 | 16 | 21  | 234 | 291 | 146 | 60 | 182 | 5.5 | 71.2 | 428 | 13.3 | 39.7 | 23.7 | 318 | 17.8 | 0.74 | 140 | 3.8 | 100 | 9.4 | 4.8 | 155 | 11 | 14 | 1.2 | 1.6 |
| 60 M | 184.1 | 90   | 26.55 | 26.2 | 102.3 | 121 | 80 | 93.67 | 57 | 13.7   | 7   | 4.2 | 1.5 | 0.6 | 34 | 49 | 88  | 159 | 205 | 196 | 52 | 122 | 6.3 | 53.5 | 501 | 16.5 | 46.9 | 16.6 | 242 | 12.8 | 0.99 | 142 | 4.1 | 104 | 9.2 | 5.7 | 46  | 9  | 11 | 0.8 | 0.9 |
| 68 M | 169.7 | 67.3 | 23.37 | 18.1 | 87    | 124 | 78 | 93.33 | 61 | 27.9   | 7.5 | 4.4 | 1.4 | 0.4 | 22 | 20 | 27  | 174 | 186 | 66  | 59 | 96  | 5.6 | 86.7 | 507 | 14.7 | 43.6 | 21.2 | 343 | 17.8 | 0.84 | 141 | 4.3 | 102 | 9.2 | 6.3 | 81  | 12 | 12 | 1.2 | 0.9 |
| 66 F | 153.3 | 52.1 | 22.17 | 26.7 | 83.4  | 118 | 62 | 80.67 | 57 | 8.6    | 8.1 | 4.6 | 1.3 | 0.8 | 20 | 13 | 14  | 307 | 253 | 59  | 75 | 156 | 5   | 44.3 | 473 | 14.1 | 41.7 | 19.5 | 242 | 18.8 | 0.52 | 141 | 4.3 | 101 | 9.9 | 6.3 | 71  | 14 | 13 | 0.9 | 1.3 |
| 70 M | 176.1 | 61.2 | 19.73 | 17   | 81.3  | 125 | 53 | 77    | 50 | 27.4   | 7.3 | 4.4 | 1.5 | 0.8 | 26 | 16 | 18  | 208 | 201 | 78  | 72 | 115 | 5.2 | 45.3 | 456 | 14.7 | 43.3 | 18.6 | 256 | 14.1 | 0.79 | 141 | 4.2 | 101 | 9.4 | 6.2 | 64  | 8  | 11 | 1   | 1.3 |
| 67 F | 149.1 | 56.3 | 25.33 | 32.9 | 87.8  | 108 | 63 | 78    | 49 | 15.2   | 7.9 | 4.6 | 1.4 | 0.7 | 19 | 16 | 27  | 235 | 240 | 88  | 74 | 143 | 5.4 | 37.6 | 448 | 14.5 | 42.8 | 18.1 | 238 | 12.4 | 0.49 | 143 | 4   | 103 | 9.3 | 4.9 | 63  | 13 | 14 | 0.8 | 0.9 |
| 66 M | 170.5 | 75.6 | 26.01 | 26.1 | 95    | 140 | 76 | 97.33 | 68 | 8      | 7   | 4.5 | 1.8 | 0.8 | 21 | 26 | 44  | 223 | 168 | 172 | 77 | 56  | 5.3 | 55.1 | 459 | 14.9 | 43.4 | 28.3 | 252 | 15.9 | 0.59 | 143 | 4.1 | 101 | 9.2 | 4.8 | 44  | 14 | 13 | 2.1 | 0.9 |
| 73 F | 149.1 | 42.4 | 19.07 | 22.2 | 73    | 139 | 97 | 111   | 86 | 42.7   | 7.7 | 4.3 | 1.3 | 0.8 | 25 | 16 | 37  | 140 | 209 | 61  | 87 | 92  | 4.7 | 44   | 411 | 14.1 | 41.7 | 18   | 224 | 12.6 | 0.57 | 144 | 3.9 | 105 | 9.1 | 5.2 | 124 | 18 | 16 | 0.9 | 0.8 |
| 72 M | 172.2 | 77.1 | 26    | 28.8 | 96.5  | 135 | 80 | 98.33 | 52 | 33.2   | 7.9 | 4.3 | 1.2 | 1.4 | 23 | 16 | 28  | 159 | 212 | 65  | 59 | 141 | 5.3 | 53.2 | 460 | 15   | 44   | 26.1 | 296 | 15   | 0.89 | 140 | 3.9 | 100 | 9.2 | 6   | 99  | 12 | 13 | 0.9 | 0.8 |
| 70 F | 152.1 | 43.3 | 18.72 | 26   | 86.8  | 146 | 85 | 105.3 | 83 | 17.4   | 7.6 | 4.3 | 1.3 | 0.6 | 21 | 13 | 21  | 321 | 226 | 87  | 81 | 99  | 6   | 56.9 | 478 | 13.8 | 42.2 | 24.1 | 264 | 15   | 0.35 | 142 | 3.9 | 103 | 9   | 2.7 | 69  | 12 | 12 | 2.8 | 1.7 |
| 68 M | 168.2 | 64.8 | 22.9  | 20.7 | 88.5  | 136 | 88 | 104   | 64 | 26.4   | 6.7 | 4   | 1.5 | 0.9 | 18 | 17 | 34  | 205 | 202 | 101 | 50 | 137 | 4.8 | 39.9 | 431 | 13.6 | 40.3 | 24   | 238 | 13.2 | 0.83 | 144 | 3.9 | 107 | 9   | 7.5 | 77  | 14 | 12 | 0.9 | 1.3 |
| 63 M | 167.4 | 63.3 | 22.59 | 22.8 | 89.5  | 125 | 78 | 93.67 | 55 | 5.4    | 8   | 4.4 | 1.2 | 0.9 | 27 | 21 | 31  | 214 | 197 | 131 | 49 | 114 | 5.2 | 63.9 | 450 | 13.7 | 40.8 | 29.3 | 312 | 16.5 | 0.72 | 142 | 4.3 | 104 | 9.4 | 6.6 | 75  | 14 | 12 | 2.4 | 3.3 |
| 78 F | 155.6 | 49.1 | 20.28 | 22.7 | 73.5  | 135 | 63 | 87    | 84 | 60.3   | 7.4 | 4.3 | 1.4 | 0.8 | 23 | 24 | 21  | 193 | 154 | 130 | 63 | 59  | 5.5 | 46.3 | 456 | 14.7 | 43.5 | 17   | 238 | 18.6 | 0.6  | 145 | 4.3 | 102 | 9.6 | 5.2 | 56  | 14 | 17 | 0.7 | 1   |
| 70 F | 154.5 | 60.9 | 25.51 | 32.3 | 100   | 132 | 76 | 94.67 | 68 | 27.4   | 6.9 | 4   | 1.4 | 0.5 | 15 | 13 | 40  | 348 | 187 | 86  | 73 | 88  | 5.4 | 48.4 | 475 | 14   | 41.3 | 24.7 | 202 | 16.6 | 0.58 | 143 | 4.1 | 106 | 9.2 | 4.3 | 43  | 9  | 10 | 0.9 | 1.3 |
| 42 M | 172   | 66.6 | 22.51 | 16.9 | 77.3  | 154 | 92 | 112.7 | 56 | 24.3   | 7.9 | 4.6 | 1.4 | 0.9 | 18 | 15 | 61  | 189 | 209 | 160 | 67 | 110 | 4.9 | 42.2 | 522 | 16.4 | 46.5 | 21.6 | 281 | 16   | 0.93 | 141 | 3.9 | 99  | 9.4 | 7   | 58  | 22 | 21 | 1   | 0.9 |
| 60 M | 168.7 | 71   | 24.95 | 26.7 | 93.5  | 142 | 83 | 102.7 | 63 | 7.8    | 7.6 | 4.1 | 1.2 | 0.9 | 17 | 13 | 23  | 212 | 232 | 210 | 58 | 114 | 5.5 | 56   | 481 | 15.5 | 45.1 | 26.3 | 330 | 16.9 | 1.03 | 142 | 4   | 104 | 9.6 | 7.8 | 55  | 11 | 13 | 2.1 | 2.7 |
| 55 F | 151.7 | 46.2 | 20.08 | 25.3 | 74    | 117 | 65 | 82.33 | 60 | 2.7    | 7.1 | 4.4 | 1.6 | 0.8 | 18 | 17 | 15  | 218 | 265 | 54  | 88 | 150 | 5.6 | 42.1 | 502 | 15.2 | 44.5 | 21.3 | 216 | 16   | 0.59 | 142 | 3.7 | 102 | 9.8 | 3.9 | 102 | 12 | 11 | 0.8 | 0.8 |
| 46 F | 160   | 64.8 | 25.31 | 31.3 | 91.5  | 133 | 90 | 104.3 | 65 | 11.1   | 7.5 | 4.2 | 1.3 | 0.6 | 19 | 16 | 27  | 126 | 184 | 62  | 68 | 101 | 5.6 | 69.8 | 451 | 8    | 28.2 | 24.2 | 221 | 15.4 | 0.63 | 141 | 4.6 | 104 | 9.5 | 5   | 64  | 14 | 12 | 0.7 | 0.8 |
| 61 M | 162.1 | 51.6 | 19.64 | 16.4 | 74.6  | 116 | 75 | 88.67 | 68 | 8.1    | 7.5 | 4.3 | 1.3 | 1.2 | 24 | 14 | 16  | 162 | 214 | 63  | 73 | 118 | 5.7 | 27.7 | 469 | 15.4 | 46.5 | 18   | 286 | 20   | 0.85 | 143 | 5   | 103 | 9.3 | 5.9 | 120 | 8  | 13 | 0.9 | 1.5 |
| 70 M | 168.1 | 68.7 | 24.31 | 24.5 | 86.5  | 151 | 81 | 104.3 | 69 | 24.8   | 7.5 | 4.4 | 1.4 | 1.5 | 27 | 16 | 44  | 169 | 196 | 76  | 67 | 106 | 6.2 | 58.7 | 443 | 14.3 | 41.9 | 18.8 | 318 | 22.4 | 0.85 | 142 | 4.3 | 104 | 9.5 | 7.6 | 43  | 13 | 15 | 2.5 | 3.6 |
| 62 M | 181.3 | 89.6 | 27.26 | 29.5 | 99.8  | 138 | 89 | 105.3 | 50 | 9.9    | 7.3 | 4.1 | 1.3 | 0.7 | 18 | 15 | 24  | 171 | 213 | 133 | 50 | 144 | 5.1 | 62.3 | 488 | 14.9 | 42.9 | 28   | 227 | 11.3 | 1.07 | 143 | 4.3 | 105 | 9.4 | 7   | 82  | 10 | 14 | 1.9 | 0.8 |
| 38 M | 173.3 | 61.4 | 20.44 | 22.5 | 76.5  | 119 | 72 | 87.67 | 51 | 6      | 7.5 | 4.6 | 1.6 | 1.1 | 23 | 39 | 120 | 247 | 219 | 108 | 50 | 147 | 5.1 | 56.1 | 521 | 15.8 | 45.7 | 17.3 | 264 | 11.9 | 0.98 | 143 | 3.8 | 102 | 9.5 | 6.3 | 58  | 14 | 13 | 0.7 | 0.8 |
| 83 M | 154.6 | 59.6 | 24.94 | 16.6 | 88    | 97  | 42 | 60.33 | 76 | 36.7   | 7.4 | 4.3 | 1.4 | 0.8 | 23 | 16 | 29  | 519 | 198 | 84  | 89 | 103 | 5.3 | 46.9 | 437 | 14.5 | 40.4 | 10.2 | 286 | 11.2 | 0.92 | 146 | 3.9 | 106 | 9.2 | 6.5 | 159 | 8  | 8  | 2.3 | 2.9 |
| 77 M | 166.9 | 51.4 | 18.45 | 11.7 | 70    | 87  | 60 | 69    | 68 | 56.5   | 7.8 | 4.4 | 1.3 | 0.5 | 23 | 12 | 90  | 349 | 197 | 72  | 76 | 99  | 5.4 | 58.4 | 515 | 16.4 | 47.1 | 15   | 224 | 20.1 | 1    | 139 | 5.1 | 101 | 9.5 | 5.4 | 210 | 8  | 8  | 1   | 1.1 |
| 62 M | 167.2 | 64.8 | 23.18 | 27   | 91.3  | 119 | 75 | 89.67 | 63 | 28     | 7.6 | 4.3 | 1.3 | 0.5 | 17 | 14 | 23  | 229 | 197 | 192 | 38 | 126 | 5.6 | 50.5 | 459 | 14.4 | 41.7 | 23.7 | 301 | 19.9 | 0.75 | 140 | 4.3 | 102 | 9.2 | 4.8 | 98  | 15 | 15 | 1.1 | 0.8 |
| 63 M | 162.4 | 62.4 | 23.66 | 22.2 | 87.5  | 129 | 70 | 89.67 | 57 | 8      | 7.1 | 4.1 | 1.4 | 0.6 | 32 | 16 | 68  | 145 | 200 | 171 | 50 | 118 | 5.6 | 85.4 | 457 | 14.2 | 40.8 | 24   | 224 | 18.7 | 0.88 | 143 | 4.7 | 104 | 9.1 | 5   | 97  | 15 | 14 | 2.6 | 1.7 |
| 62 F | 161.5 | 52.8 | 20.24 | 24.2 | 74    | 103 | 57 | 72.33 | 59 | 20.4   | 7.7 | 4.6 | 1.5 | 0.8 | 46 | 29 | 40  | 177 | 196 | 125 | 76 | 95  | 5.4 | 87.4 | 421 | 13.6 | 38.8 | 21.3 | 272 | 14.5 | 0.58 | 142 | 4.5 | 102 | 9.6 | 3.9 | 84  | 8  | 9  | 1   | 1.1 |
| 71 M | 164.7 | 63.1 | 23.26 | 20.8 | 81.5  | 129 | 67 | 87.67 | 52 | 17.2</ |     |     |     |     |    |    |     |     |     |     |    |     |     |      |     |      |      |      |     |      |      |     |     |     |     |     |     |    |    |     |     |
